# Supplementary material for: Use of extracellular vesicles from lymphatic drainage as surrogate markers of melanoma progression and BRAFV600E mutation
Source: PubMed Central journal article supplement — J Exp Med. 2019 Apr 11;216(5):1061–70. doi: 10.1084/jem.20181522 (PMC6504207; doi:10.1084/jem.20181522), 2019-04-11
Supplement: JEM_20181522_sm.pdf [file JEM_20181522_sm.pdf]

Supplemental material

García-Silva et al., <https://doi.org/10.1084/jem.20181522>

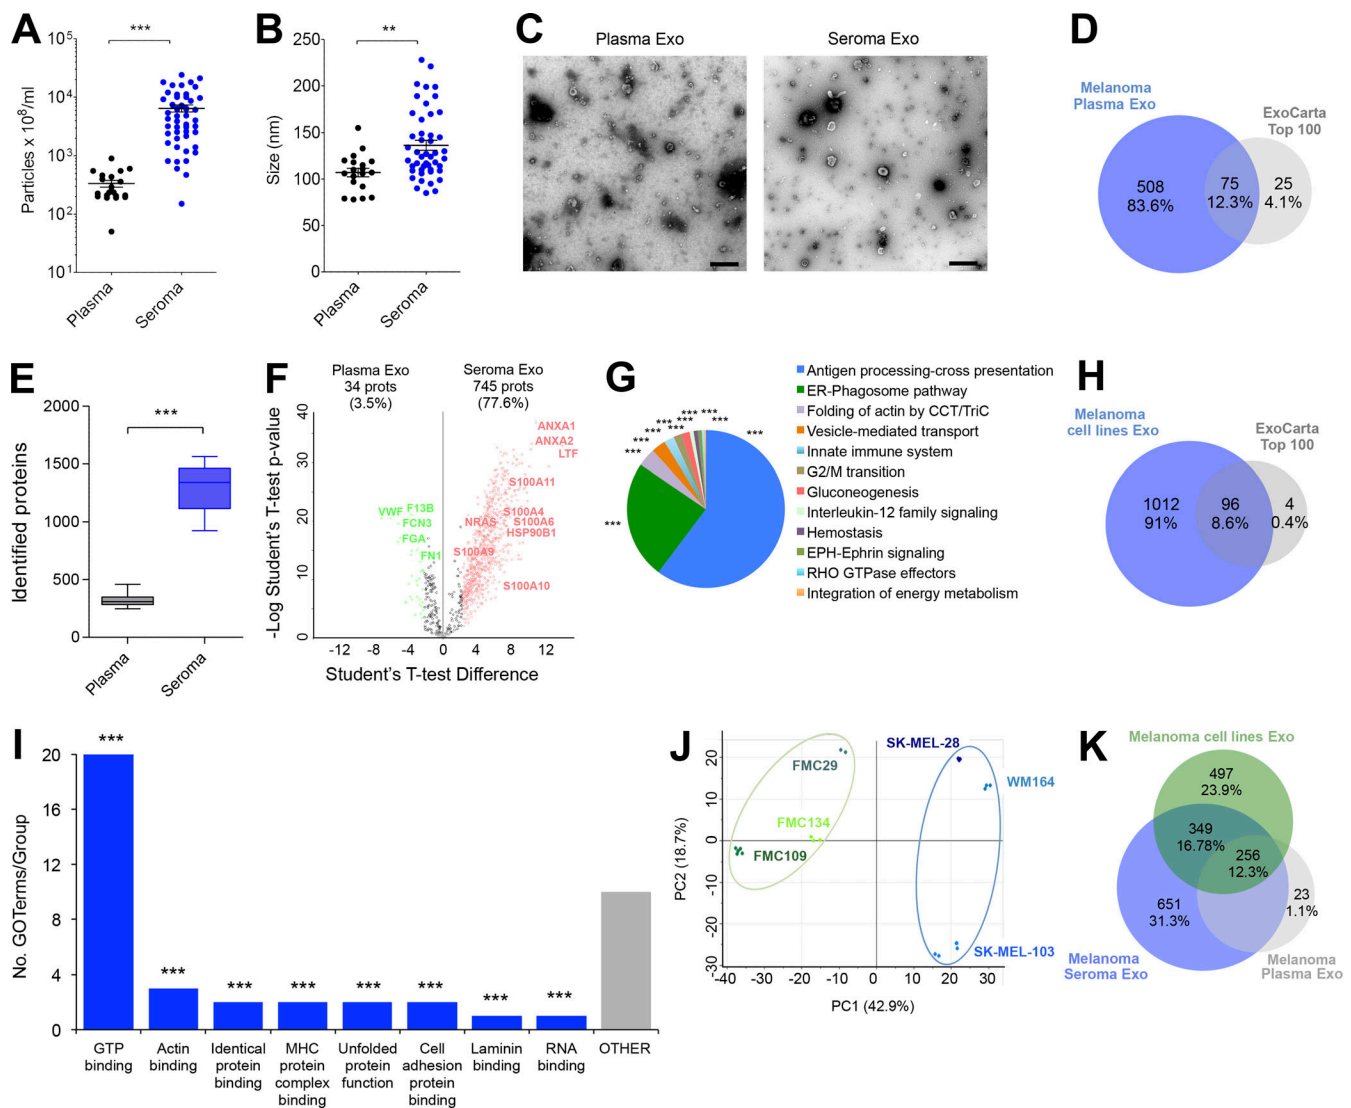

Figure S1. **Characterization of ES-derived exosomes.** (A and B) Concentration of particles (A) and size (diameter, mean) of exosomes (B) purified from plasma ( $n = 20$ ) and ES ( $n = 40$ ) from melanoma patients. (C) Representative EM images of exosomes from plasma and ES. Bars, 500 nm. (D) Overlap between proteins in plasma-derived exosomes and the top 100 proteins in the ExoCarta database. (E) Number of proteins identified by LC-MS/MS in plasma- and ES-derived exosomes. (F) Volcano plot of differentially expressed proteins in plasma- and ES-derived exosomes. Red and green circles represent proteins differentially expressed with  $P < 0.05$ . (G) Reactome pathways associated with upregulated proteins in ES- compared with plasma-derived exosomes. (H) Venn diagram of proteins in melanoma cell line-derived exosomes overlapping with the top 100 proteins in the ExoCarta database. (I) Significant GO Terms (molecular function) enriched in melanoma cell line-derived exosomes. (J) PCA of melanocyte- and melanoma cell line-derived exosomes. (K) Venn diagram of proteins in exosomes purified from ES, plasma, and melanoma cell lines. Dot plots represent mean  $\pm$  SEM. \*\*\*,  $P < 0.001$ ; \*\*,  $P < 0.01$ , as determined by unpaired Student's  $t$  test (A and B). In pie charts, \*\*\* indicates group-corrected  $P < 0.001$  as determined by Bonferroni stepdown test applied to pathway networks (G). Exo, exosomes; prots, proteins.

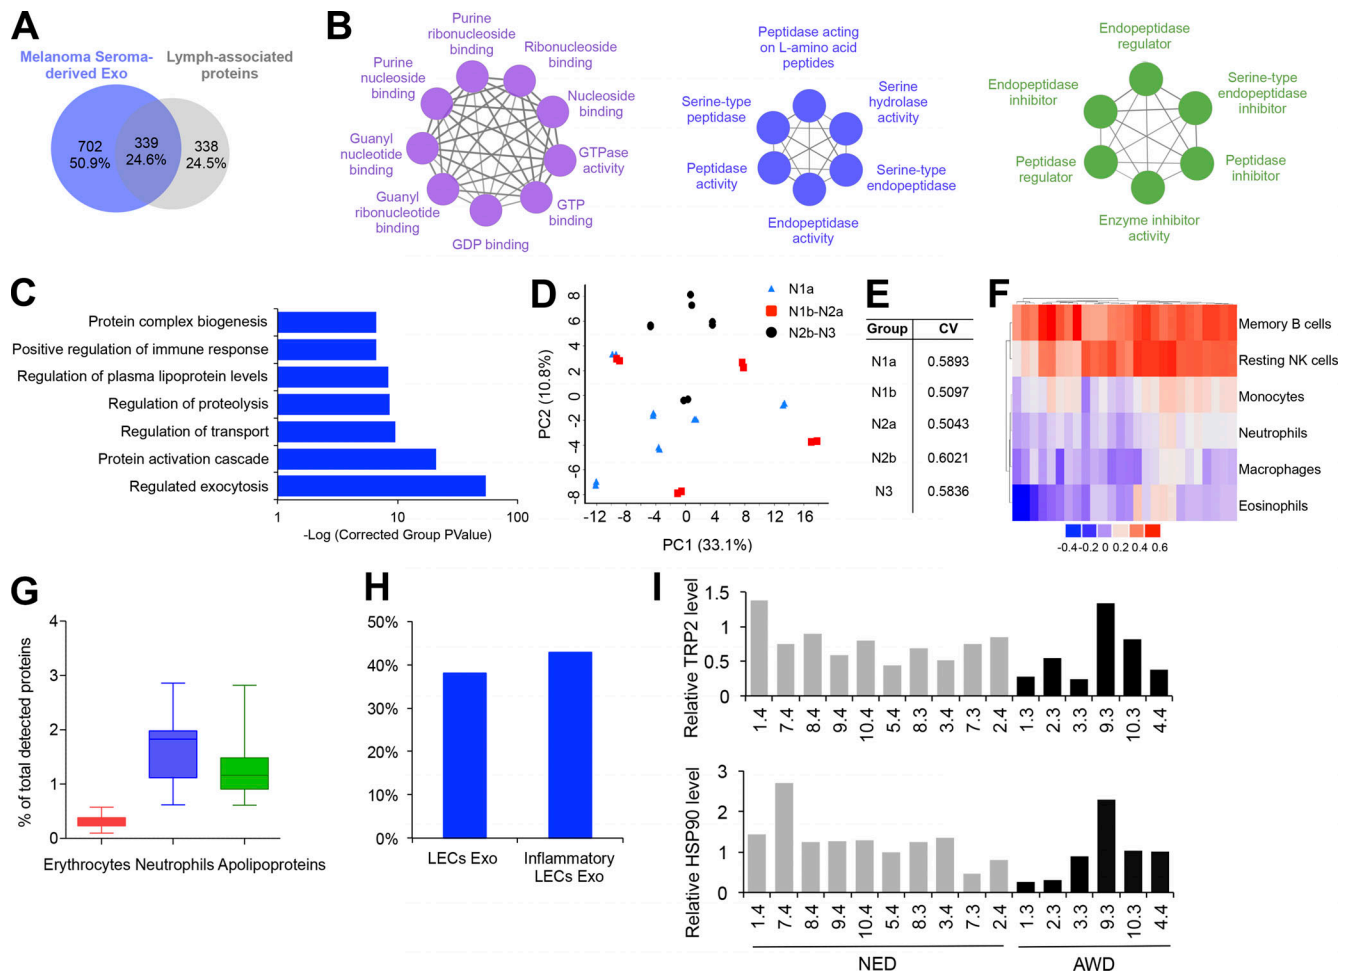

Figure S2. **Characterization of ES-derived exosomes.** (A) Venn diagram of proteins in ES-derived exosomes and the proteins identified in human lymph. (B) GO Terms (molecular function) enriched in ES-derived exosomes by ClueGO and plotted with Cytoscape. (C) GO Terms (biological process) significantly enriched in ES-derived exosomes analyzed by ClueGO. (D) PCA of ES-derived exosome samples from stage III melanoma patients with different LN involvement. (E) Coefficients of variation (CV) for the proteomic samples grouped by substage. (F) Gene set enrichment analysis of ES-derived exosomes for the indicated hematopoietic cell types. (G) Analysis of contaminants in ES-derived EVs. (H) Percentage of proteins identified in human lymphatic endothelial cell exosomes in steady state (LECs Exo) and in inflammatory conditions (Inflammatory LECs Exo) that were present in ES-derived exosomes. (I) Quantification of Western blot shown in Fig. 3 G. AWD, alive with disease; Exo, exosomes; NED, no evidence of disease.

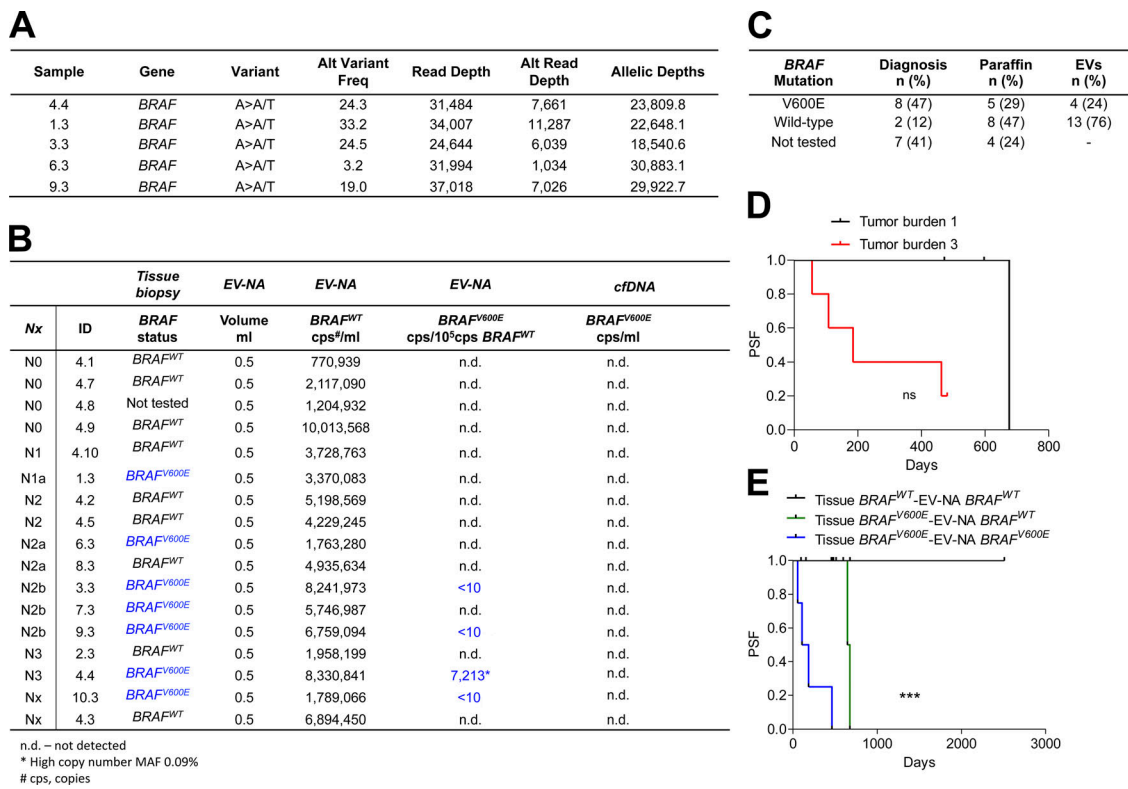

Figure S3. **Detection of the *BRAF*<sup>V600E</sup> mutation in melanoma patient samples.** (A) *BRAF* status and the percentage of allelic variation in LN paraffin sections obtained by deep sequencing in patients when available. (B) *BRAF*<sup>WT</sup> and *BRAF*<sup>V600E</sup> copies found in ES-derived EV-NAs and cfDNA by quantitative PCR. (C) Summary of analyzed patients. (D) Kaplan–Meier plot showing PFS of *BRAF*<sup>V600E</sup> patients classified according to the tumor burden criteria specified in Fig. 4 B. (E) Kaplan–Meier curve showing PFS of patients stratified according to *BRAF* status both in tissue and liquid biopsy. Mantel–Cox log-rank test was applied to the survival curves. ns, not significant,  $P = 0.0532$  (D), and  $***, P < 0.0001$  (E). cps, copies; MAF, mutant allele frequency.

Table S1. **Clinicopathologic characteristics of melanoma patients for matched plasma and ES samples**

| Nx  | CNIO ID | Age (yr) | T   | Primary tumor location | LN.D. location | Metastatic LNs (n) | Tumor burden <sup>a</sup> |
|-----|---------|----------|-----|------------------------|----------------|--------------------|---------------------------|
| N1a | 5.1     | 73       | T3a | Back                   | Axillary       | 1                  | No                        |
| N0  | 5.2     | 38       | T3b | Breast                 | Axillary       | 0                  | 1                         |
| N1a | 5.3     | 75       | T3b | Leg (shank)            | Inguinal       | 1                  | 1                         |
| N0  | 5.4     | 64       | T4  | Leg (thigh)            | Inguinal       | 0                  | 1                         |
| N0  | 5.5     | 58       | T3b | Loins                  | Axillary       | 0                  | 1                         |
| N1b | 5.6     | 66       | T3a | Arm                    | Axillary       | 1                  | No                        |
| N2b | 5.7     | 72       | T1b | Abdomen                | Axillary       | 3                  | 1                         |
| N3a | 5.8     | 68       | T3b | Back                   | Axillary       | 4                  | 1                         |
| N2b | 5.9     | 35       | T4b | Leg (thigh)            | Inguinal       | 2                  | 3                         |
| N3b | 5.10    | 85       | T3b | Leg (shank)            | Inguinal       | 4                  | 3                         |
| N1b | 5.11    | 70       | T3b | Chest                  | Axillary       | 1                  | 3                         |

CNIO, Spanish National Cancer Research Center; LN.D. location, lymphadenectomy location; Nx, AJCC stage; T, tumor classification.

<sup>a</sup>Tumor burden: 1, low (micrometastases detected in sLN biopsy only); 3, high (clinically detected macrometastases).

Table S2. **Clinicopathologic characteristics of melanoma patients for independent plasma and ES samples**

| <b>Variable</b>                 | <b>Value</b>    |
|---------------------------------|-----------------|
| Age (median), yr                | 61              |
| Primary tumor stage             | No. of patients |
| T1                              | 5               |
| T2                              | 9               |
| T3                              | 9               |
| T4                              | 10              |
| Tx                              | 7               |
| LN involvement                  | No. of patients |
| N0                              | 4               |
| N1                              | 15              |
| N2                              | 11              |
| N3                              | 8               |
| Nx                              | 2               |
| Primary tumor location          | No. of patients |
| Arm                             | 5               |
| Back                            | 4               |
| Head                            | 4               |
| Heel                            | 2               |
| Leg                             | 3               |
| Neck                            | 1               |
| Thorax/shoulder                 | 4               |
| Thigh                           | 1               |
| Trunk                           | 9               |
| Location of lymphadenectomy     | No. of patients |
| Axillary                        | 24              |
| Inguinal                        | 10              |
| Neck                            | 5               |
| Unknown                         | 1               |
| Number of metastatic LNs        | No. of patients |
| 0                               | 6               |
| 1                               | 15              |
| 2                               | 7               |
| >3                              | 10              |
| Extracapsular involvement       | No. of patients |
| No                              | 28              |
| Yes                             | 10              |
| Unknown                         | 2               |
| <i>BRAF</i> status at diagnosis | No. of patients |
| V600-                           | 4               |
| V600+                           | 14              |
| V600E+                          | 3               |
| Not tested                      | 19              |

Table S6. **Clinicopathologic characteristics of the melanoma patients included in the proteomic profile of ES samples with different LN involvement**

| Nx  | CNIO ID | Age (yr) | T   | Primary tumor location | LN.D. Location | Metastatic LNs (n) | Extracapsular involvement | Excised nodes (n) |
|-----|---------|----------|-----|------------------------|----------------|--------------------|---------------------------|-------------------|
| N1a | 2.2     | 33       | T3a | Thorax/shoulder        | Axillary       | 1                  | No                        | 9                 |
| N1a | 3.2     | 71       | T4b | Back                   | Axillary       | 1                  | No                        | 13                |
| N1a | 7.2     | 61       | T1a | Back                   | Axillary       | 1                  | No                        | 15                |
| N1a | 1.3     | 54       | T3b | Head                   | Iliac-inguinal | 1                  | No                        | 14                |
| N1b | 4.2     | 85       | T1b | Arm                    | Axillary       | 1                  | No                        | 12                |
| N1b | 5.2     | 67       | Tx  | N.D.                   | Axillary       | 1                  | No                        | 18                |
| N2  | 5.3     | 71       | T2a | Trunk                  | Axillary       | N.D.               | No                        | N.D.              |
| N2a | 4.3     | 49       | T2a | L. arm                 | Axillary       | 2                  | No                        | 12                |
| N2a | 6.3     | 40       | T2a | Trunk                  | Axillary       | 2                  | No                        | 13                |
| N2a | 8.3     | 70       | T3a | Trunk                  | Axillary       | 3                  | Yes                       | 12                |
| N2b | 11.2    | 46       | T2a | Arm                    | Axillary       | 2                  | Yes                       | 18                |
| N2b | 3.3     | 57       | Tx  | N.D.                   | Axillary       | 2                  | Yes                       | 6                 |
| N3  | 8.2     | 59       | T4a | Thorax                 | Axillary       | 18                 | Yes                       | 32                |
| N3  | 2.3     | 69       | T3b | Back                   | Axillary       | 4                  | No                        | 14                |

Gray shading indicates that patients were used also for *BRAF*<sup>V600E</sup> analysis. CNIO, Spanish National Cancer Research Center; L., left; LN.D. location, lymphadenectomy location; N.D., not determined/unknown; Nx, AJCC stage; T, tumor classification.

Table S10. **Proteins differentially expressed in melanoma AJCC stage III LNs found in melanoma patient-derived seroma exosomes**

| Entry  | Entry name  | Gene     | Protein names                                                 |
|--------|-------------|----------|---------------------------------------------------------------|
| P23526 | SAHH_HUMAN  | AHCY     | Adenosylhomocysteinase                                        |
| Q09666 | AHNAK_HUMAN | AHNAK    | Neuroblast differentiation-associated protein AHNAK           |
| P04083 | ANXA1_HUMAN | ANXA1    | Annexin A1                                                    |
| P01024 | CO3_HUMAN   | C3       | Complement C3                                                 |
| P27797 | CALR_HUMAN  | CALR     | Calreticulin                                                  |
| P78371 | TCPB_HUMAN  | CCT2     | T-complex protein 1 subunit beta                              |
| P10909 | CLUS_HUMAN  | CLU      | Clusterin                                                     |
| P02452 | CO1A1_HUMAN | COL1A1   | Collagen alpha-1                                              |
| Q14019 | COTL1_HUMAN | COTL1    | Coactosin-like protein                                        |
| Q08211 | DHX9_HUMAN  | DHX9     | ATP-dependent RNA helicase A                                  |
| Q96C19 | EFHD2_HUMAN | EFHD2    | EF-hand domain-containing protein D2                          |
| P60842 | IF4A1_HUMAN | EIF4A1   | Eukaryotic initiation factor 4A-I                             |
| O75367 | H2AY_HUMAN  | H2AFY    | Core histone macro-H2A.1                                      |
| P61978 | HNRPK_HUMAN | HNRNPK   | Heterogeneous nuclear ribonucleoprotein K                     |
| Q00839 | HNRPU_HUMAN | HNRNPU   | Heterogeneous nuclear ribonucleoprotein U                     |
| P00738 | HPT_HUMAN   | HP       | Haptoglobin                                                   |
| P02790 | HEMO_HUMAN  | HPX      | Hemopexin                                                     |
| P08238 | HS90B_HUMAN | HSP90AB1 | Heat shock protein HSP 90-beta                                |
| P11142 | HSP7C_HUMAN | HSPA8    | Heat shock cognate 71-kD protein                              |
| P35527 | K1C9_HUMAN  | KRT9     | Keratin                                                       |
| P13796 | PLSL_HUMAN  | LCP1     | Plastin-2                                                     |
| P00338 | LDHA_HUMAN  | LDHA     | L-lactate dehydrogenase A chain                               |
| P07195 | LDHB_HUMAN  | LDHB     | L-lactate dehydrogenase B chain                               |
| P33241 | LSP1_HUMAN  | LSP1     | Lymphocyte-specific protein 1                                 |
| P51884 | LUM_HUMAN   | LUM      | Lumican                                                       |
| P29966 | MARCS_HUMAN | MARCKS   | Myristoylated alanine-rich C-kinase substrate                 |
| P40926 | MDHM_HUMAN  | MDH2     | Malate dehydrogenase                                          |
| P26038 | MOES_HUMAN  | MSN      | Moesin                                                        |
| P19105 | ML12A_HUMAN | MYL12A   | Myosin regulatory light-chain 12A                             |
| P07237 | PDIA1_HUMAN | P4HB     | Protein disulfide-isomerase                                   |
| Q99497 | PARK7_HUMAN | PARK7    | Protein/nucleic acid deglycase DJ-1                           |
| P30048 | PRDX3_HUMAN | PRDX3    | Thioredoxin-dependent peroxide reductase                      |
| P10644 | KAPO_HUMAN  | PRKAR1A  | cAMP-dependent protein kinase type I-alpha regulatory subunit |
| P14314 | GLU2B_HUMAN | PRKCSH   | Glucosidase 2 subunit beta                                    |
| Q06323 | PSME1_HUMAN | PSME1    | Proteasome activator complex subunit 1                        |
| P62826 | RAN_HUMAN   | RAN      | GTP-binding nuclear protein Ran                               |
| P23396 | RS3_HUMAN   | RPS3     | 40S ribosomal protein S3                                      |
| P31949 | S10AB_HUMAN | S100A11  | Protein S100-A11                                              |
| P01009 | A1AT_HUMAN  | SERPINA1 | Alpha-1-antitrypsin                                           |
| P04179 | SODM_HUMAN  | SOD2     | Superoxide dismutase [Mn]                                     |
| P53999 | TCP4_HUMAN  | SUB1     | Activated RNA polymerase II transcriptional coactivator p15   |
| P37802 | TAGL2_HUMAN | TAGLN2   | Transgelin-2                                                  |
| O15533 | TPSN_HUMAN  | TAPBP    | Tapasin                                                       |
| P02787 | TRFE_HUMAN  | TF       | Serotransferrin                                               |

Table S10. **Proteins differentially expressed in melanoma AJCC stage III LNs found in melanoma patient-derived seroma exosomes (Continued)**

| Entry  | Entry name   | Gene     | Protein names                                                 |
|--------|--------------|----------|---------------------------------------------------------------|
| P19971 | TYPH_HUMAN   | TYMP     | Thymidine phosphorylase                                       |
| P13010 | XRCC5_HUMAN  | XRCC5    | X-ray repair cross-complementing protein 5                    |
| P12956 | XRCC6_HUMAN  | XRCC6    | X-ray repair cross-complementing protein 6                    |
| P63104 | 1433Z_HUMAN  | YWHAZ    | 14-3-3 protein zeta/delta                                     |
| Q92820 | GGH_HUMAN    | GGH      | Gamma-glutamyl hydrolase                                      |
| O75431 | MTX2_HUMAN   | MTX2     | Metaxin-2                                                     |
| P09874 | PARP1_HUMAN  | PARP1    | Poly [ADP-ribose] polymerase 1                                |
| P30046 | DOPD_HUMAN   | DDT      | D-dopachrome decarboxylase                                    |
| Q99798 | ACON_HUMAN   | ACO2     | Aconitate hydratase                                           |
| Q15233 | NONO_HUMAN   | NONO     | Non-POU domain-containing octamer-binding protein             |
| P35580 | MYH10_HUMAN  | MYH10    | Myosin-10                                                     |
| Q99832 | TCPH_HUMAN   | CCT7     | T-complex protein 1 subunit eta                               |
| P22087 | FBRL_HUMAN   | FBL      | rRNA 2'-O-methyltransferase fibrillarin                       |
| Q9Y3E5 | PTH2_HUMAN   | PTRH2    | Peptidyl-tRNA hydrolase 2                                     |
| Q15121 | PEA15_HUMAN  | PEA15    | Astrocytic phosphoprotein PEA-15                              |
| P78417 | GSTO1_HUMAN  | GSTO1    | Glutathione S-transferase omega-1                             |
| O75368 | SH3L1_HUMAN  | SH3BGR1  | SH3 domain-binding glutamic acid-rich-like protein            |
| P23381 | SYWC_HUMAN   | WARS     | Tryptophan-tRNA ligase                                        |
| P28838 | AMPL_HUMAN   | LAP3     | Cytosol aminopeptidase                                        |
| P42224 | STAT1_HUMAN  | STAT1    | Signal transducer and activator of transcription 1-alpha/beta |
| Q07021 | C1QBP_HUMAN  | C1QBP    | Complement component 1 Q subcomponent-binding protein         |
| P24821 | TENA_HUMAN   | TNC      | Tenascin                                                      |
| Q9ULZ3 | ASC_HUMAN    | PYCARD   | Apoptosis-associated speck-like protein containing a CARD     |
| P99999 | CYC_HUMAN    | CYCS     | Cytochrome c                                                  |
| Q27J81 | INF2_HUMAN   | INF2     | Inverted formin-2                                             |
| Q53HJ8 | Q53HJ8_HUMAN | Unknown  | PKCI-1-related HIT protein variant                            |
| Q9UL46 | PSME2_HUMAN  | PSME2    | Proteasome activator complex subunit 2                        |
| P07093 | GDN_HUMAN    | SERPINE2 | Glia-derived nexin                                            |
| P55008 | AIF1_HUMAN   | AIF1     | Allograft inflammatory factor 1                               |

Gray shaded rows indicate common proteins between ES exosomes and differentially expressed proteins in LNs from poor and good prognosis patients described in [Mactier et al. \(2014\)](#). Unshaded rows indicate proteins exclusively found in [Mactier et al. \(2014\)](#).

Table S11. **Prognostic markers in melanoma AJCC stage III found in melanoma patient-derived seroma exosomes**

| <b>Entry</b> | <b>Entry name</b> | <b>Protein names</b>                                             | <b>Gene names</b> |
|--------------|-------------------|------------------------------------------------------------------|-------------------|
| Q15063       | POSTN_HUMAN       | Periostin (PN)                                                   | POSTN             |
| P08238       | HS90B_HUMAN       | Heat shock protein HSP 90-beta (HSP 90)                          | HSP90AB1          |
| P11142       | HSP7C_HUMAN       | Heat shock cognate 71-kD protein                                 | HSPA8             |
| P60842       | IF4A1_HUMAN       | Eukaryotic initiation factor 4A-I                                | EIF4A1            |
| P23526       | SAHH_HUMAN        | Adenosylhomocysteinase (AdoHcyase)                               | AHCY              |
| P12956       | XRCC6_HUMAN       | X-ray repair cross-complementing protein 6                       | XRCC6             |
| P13010       | XRCC5_HUMAN       | X-ray repair cross-complementing protein 5                       | XRCC5             |
| P00338       | LDHA_HUMAN        | L-lactate dehydrogenase A chain (LDH-A)                          | LDHA              |
| Q08211       | DHX9_HUMAN        | ATP-dependent RNA helicase A                                     | DHX9              |
| P40227       | TCPZ_HUMAN        | T-complex protein 1 subunit zeta                                 | CCT6A             |
| P06576       | ATPB_HUMAN        | ATP synthase subunit beta, mitochondrial                         | ATP5F1B           |
| P27797       | CALR_HUMAN        | Calreticulin (CRP55)                                             | CALR              |
| P04179       | SODM_HUMAN        | Superoxide dismutase                                             | SOD2              |
| P10909       | CLUS_HUMAN        | Clusterin                                                        | CLU               |
| Q06323       | PSME1_HUMAN       | Proteasome activator complex subunit 1                           | PSME1             |
| O75367       | H2AY_HUMAN        | Core histone macro-H2A.1                                         | H2AFY             |
| P13796       | PLSL_HUMAN        | Plastin-2                                                        | LCP1              |
| P35527       | K1C9_HUMAN        | Keratin, type I cytoskeletal 9                                   | KRT9              |
| P09874       | PARP1_HUMAN       | Poly [ADP-ribose] polymerase 1 (PARP-1)                          | PARP1             |
| P17844       | DDX5_HUMAN        | Probable ATP-dependent RNA helicase DDX5                         | DDX5              |
| Q99798       | ACON_HUMAN        | Aconitate hydratase                                              | ACO2              |
| Q9UL46       | PSME2_HUMAN       | Proteasome activator complex subunit 2                           | PSME2             |
| Q9ULZ3       | ASC_HUMAN         | Apoptosis-associated speck-like protein containing a CARD (hASC) | PYCARD            |

Gray shaded rows indicate common proteins between ES exosomes and prognostic candidates in LNs from poor and good prognosis patients described in [Mactier et al. \(2014\)](#). Unshaded rows indicate proteins exclusively found in [Mactier et al. \(2014\)](#).



Table S12. Details of the cohort of patients included in the proteomic analysis for different LN involvement and the analysis of *BRAF*<sup>V600E</sup> in EV-NAs

| Nx  | CNIO ID | Age (yr) | T   | Primary tumor location | LN.D. location     | Metastatic LNs (n) | Extracapsular involvement | Excised nodes (n) |
|-----|---------|----------|-----|------------------------|--------------------|--------------------|---------------------------|-------------------|
| N0  | 4.1     | 60       | T1a | Back                   | Axillary L.        | 0                  | No                        | 2                 |
| N0  | 4.7     | 60       | T1b | N.D.                   | Axillary L.        | 0                  | No                        | 3                 |
| N0  | 4.8     | 86       | T1b | L. leg                 | Inguinal           | 0                  | No                        | 3                 |
| N0  | 4.9     | 57       | T2a | Shoulder               | Axillary           | 0                  | No                        | 4                 |
| N1  | 4.10    | 73       | T2a | L. arm                 | Axillary           | 1                  | No                        | 5                 |
| N1a | 10.1    | 31       | T2a | Trunk                  | Axillary           | 1                  | No                        | 12                |
| N1a | 1.2     | 72       | T4b | Lower Leg              | Inguinal           | 1                  | No                        | 10                |
| N1a | 2.2     | 33       | T3a | Thorax/shoulder        | Axillary           | 1                  | No                        | 9                 |
| N1a | 3.2     | 71       | T4b | Back                   | Axillary           | 1                  | No                        | 13                |
| N1a | 6.2     | 44       | T3b | Head                   | Neck               | 1                  | No                        | 22                |
| N1a | 7.2     | 61       | T1a | Back                   | Axillary           | 1                  | No                        | 15                |
| N1a | 10.2    | 56       | T3b | Arm                    | Axillary           | 1                  | No                        | 8                 |
| N1a | 1.3     | 54       | T3b | Head                   | Iliac-inguinal     | 1                  | No                        | 14                |
| N1b | 5.1     | 63       | Tx  | N.D.                   | Iliac-inguinal     | 1                  | Yes                       | 16                |
| N1b | 4.1     | 72       | T4b | Trunk                  | Iliac-inguinal     | 1                  | No                        | 9                 |
| N1b | 6.1     | 37       | Tx  | N.D.                   | Iliac-inguinal     | 1                  | N.D.                      | 7                 |
| N1b | 4.2     | 85       | T1b | Arm                    | Axillary           | 1                  | No                        | 12                |
| N1b | 5.2     | 67       | Tx  | N.D.                   | Axillary           | 1                  | No                        | 18                |
| N1b | 9.2     | 67       | T4b | Thigh                  | Iliac-inguinal     | 1                  | No                        | 14                |
| N2  | 5.3     | 71       | T2a | Trunk                  | Axillary           | N.D.               | No                        | N.D.              |
| N2  | 4.2     | 28       | T2  | R. shoulder            | Axillary R.        | 2                  | No                        | 2                 |
| N2  | 4.5     | 58       | T2b | L. heel                | N.D.               | N.D.               | No                        | 2                 |
| N2a | 4.3     | 49       | T2a | L. arm                 | Axillary           | 2                  | No                        | 12                |
| N2a | 6.3     | 40       | T2a | Trunk                  | Axillary           | 2                  | No                        | 13                |
| N2a | 8.3     | 70       | T3a | Trunk                  | Axillary           | 3                  | Yes                       | 12                |
| N2b | 8.1     | 61       | T4a | Trunk                  | Axillary           | 3                  | Yes                       | 10                |
| N2b | 11.2    | 46       | T2a | Arm                    | Axillary           | 2                  | Yes                       | 18                |
| N2b | 3.3     | 57       | Tx  | N.D.                   | Axillary           | 2                  | Yes                       | 6                 |
| N2b | 7.3     | 62       | Tx  | Neck                   | Neck               | 2                  | No                        | 10                |
| N2b | 9.3     | 64       | T4b | Trunk                  | Iliac-inguinal     | 2                  | Yes                       | 10                |
| N3  | 1.1     | 81       | T4a | Head                   | Neck bilateral     | 7                  | Yes                       | 28                |
| N3  | 2.1     | 31       | Tx  | N.D.                   | Neck L.            | 4                  | No                        | 14                |
| N3  | 3.1     | 52       | T3a | Trunk                  | Axillary bilateral | 6                  | No                        | 31                |
| N3  | 7.1     | 88       | T4b | Lower leg              | Inguinal           | 7                  | No                        | 10                |
| N3  | 9.1     | 82       | T3b | Trunk                  | Axillary           | 5                  | Yes                       | N.D.              |
| N3  | 8.2     | 59       | T4a | Thorax                 | Axillary           | 18                 | Yes                       | 32                |
| N3  | 2.3     | 69       | T3b | Back                   | Axillary           | 4                  | No                        | 14                |
| N3  | 4.4     | 74       | Tx  | N.D.                   | Axillary R.        | 15                 | Yes                       | 39                |
| Nx  | 10.3    | 45       | T4b | Head                   | Neck               | N.D.               | N.D.                      | N.D.              |
| Nx  | 4.3     | 73       | T3  | R. heel                | Inguinal           | 0                  | No                        | 2                 |

Patients in gray shading were used for *BRAF*<sup>V600E</sup> analysis in EV-NAs. CNIO, Spanish National Cancer Research Center; L., left; LN.D. location, lymphadenectomy location; N.D., not determined/unknown; Nx, AJCC stage; R., right; T, tumor classification.

Tables S3, S4, S5, S7, S8, and S9 are provided online as separate PDF files. Table S3 lists proteins identified by LC/MS-MS in EVs from plasma and ES paired samples and in three human melanoma cell lines. Table S4 lists proteins identified in melanoma cell line-derived exosomes. Table S5 lists differentially expressed proteins between melanoma and melanocyte-derived exosomes. Table S7 lists proteins found in melanoma patient seroma-derived exosomes. Table S8 lists proteins found in melanoma patient ES-derived exosomes not found in human lymph data sets. Table S9 lists proteins upregulated in ES-derived exosomes from N3 versus N1a melanoma patients not found in human lymph datasets.

## Reference

Mactier, S., K.L. Kaufman, P. Wang, B. Crossett, G.M. Pupo, P.L. Kohnke, J.F. Thompson, R.A. Scolyer, J.Y. Yang, G.J. Mann, and R.I. Christopherson. 2014. Protein signatures correspond to survival outcomes of AJCC stage III melanoma patients. *Pigment Cell Melanoma Res.* 27:1106–1116. <https://doi.org/10.1111/pcmr.12290>
