# Supplementary material for: Use of extracellular vesicles from lymphatic drainage as surrogate markers of melanoma progression and BRAFV600E mutation
Source: PubMed Central journal article supplement — J Exp Med. 2019 Apr 11;216(5):1061–70. doi: 10.1084/jem.20181522 (PMC6504207; doi:10.1084/jem.20181522), 2019-04-11
Supplement: JEM_20181522_TableS3.pdf [file JEM_20181522_TableS3.pdf]

**Table S3. Proteins identified by LC/MS-MS in EVs from plasma and ES paired samples and in three human melanoma cell lines**

| Plasma   | Seroma  | Melanoma cell lines |
|----------|---------|---------------------|
| A1BG     | A1BG    | SEPT11              |
| A2M      | A2M     | SEPT2               |
| ACHE     | ABCB6   | SEPT6               |
| ACTA1    | ABCC1   | SEPT7               |
| ACTB     | ABCC4   | SEPT8               |
| ACTN1    | ABCC5   | SEPT9               |
| ACTN2    | ABCG2   | A2M                 |
| ACTR2    | ABHD14B | AARS                |
| ACTR3    | ABI1    | ABCC1               |
| ADAM10   | ABI3BP  | ABCC4               |
| ADAMTS13 | ACAA1   | ABCE1               |
| ADD1     | ACAA2   | ABCF1               |
| ADD2     | ACACB   | ABI1                |
| ADH1B    | ACADVL  | ACAT2               |
| ADIPOQ   | ACAP1   | ACLY                |
| AFM      | ACAT1   | ACO1                |
| AGL      | ACAT2   | ACOT7               |
| AGT      | ACHE    | ACSL3               |
| AHCY     | ACLY    | ACSL4               |
| AHNAK    | ACO1    | ACTA2               |
| AHSG     | ACO2    | ACTG1               |
| AK1      | ACOX1   | ACTN1               |
| ALAD     | ACP1    | ACTN4               |
| ALB      | ACSL1   | ACTR1A              |
| ALDH16A1 | ACSL3   | ACTR2               |
| ALDOA    | ACSL4   | ACTR3               |
| ALPL     | ACSL6   | ADAM10              |

|         |        |          |
|---------|--------|----------|
| AMBP    | ACSS2  | ADAM17   |
| ANG     | ACTA1  | ADAM9    |
| ANK1    | ACTB   | ADD1     |
| ANPEP   | ACTC1  | ADGRG1   |
| ANXA1   | ACTN1  | ADGRG6   |
| ANXA11  | ACTN2  | ADH5     |
| ANXA2   | ACTN3  | ADK      |
| ANXA3   | ACTN4  | AFP      |
| ANXA5   | ACTR1A | AGRN     |
| ANXA6   | ACTR2  | AHCY     |
| ANXA7   | ACTR3  | AHCYL1   |
| APCS    | ADAM10 | AHNAK    |
| APOA1   | ADAM8  | AIDA     |
| APOA2   | ADD1   | AK1      |
| APOA4   | ADD2   | AKAP12   |
| APOB    | ADD3   | AKR1A1   |
| APOC1   | ADH1B  | AKR1B1   |
| APOC2   | ADH5   | ALB      |
| APOC3   | ADIPOQ | ALCAM    |
| APOD    | ADK    | ALDH16A1 |
| APOE    | ADRM1  | ALDH1A1  |
| APOF    | ADSL   | ALDH1A3  |
| APOH    | AEBP1  | ALDH9A1  |
| APOL1   | AFM    | ALDOA    |
| APOM    | AGL    | ALDOC    |
| AQP1    | AGO2   | ANGPTL2  |
| ARF1    | AGPAT9 | ANLN     |
| ARG1    | AGPS   | ANO6     |
| ARHGDI3 | AGT    | ANPEP    |
| ARPC3   | AHCY   | ANTXR1   |

|          |          |          |
|----------|----------|----------|
| ATP1A1   | AHCYL1   | ANXA1    |
| ATP2A3   | AHNAK    | ANXA11   |
| ATP5A1   | AHSG     | ANXA2    |
| ATP5B    | AHSP     | ANXA4    |
| ATP6V0D1 | AK1      | ANXA5    |
| ATP6V1B2 | AK2      | ANXA6    |
| ATRN     | AKAP12   | ANXA7    |
| AZGP1    | AKR1A1   | AP1B1    |
| B2M      | AKR1B1   | AP1M1    |
| BAIAP2   | AKR1C2   | AP2A1    |
| BANF1    | AKR1C3   | AP2A2    |
| BASP1    | AKR7A2   | AP2B1    |
| BCAM     | ALAD     | AP2M1    |
| BCHE     | ALB      | APOB     |
| BLVRB    | ALDH16A1 | APOE     |
| BPI      | ALDH1A1  | APOH     |
| BSG      | ALDH1L1  | ARCN1    |
| BTD      | ALDH2    | ARF1     |
| C1QA     | ALDH3A2  | ARF3     |
| C1QB     | ALDH3B1  | ARF4     |
| C1QC     | ALDH9A1  | ARF6     |
| C1R      | ALDOA    | ARHGDI1A |
| C1S      | ALDOC    | ARL8B    |
| C2       | ALOX5    | ARPC1A   |
| C3       | ALOX5AP  | ARPC1B   |
| C4A      | ALPL     | ARPC2    |
| C4B      | AMBIP    | ARPC3    |
| C4BPA    | AMPD1    | ARPC4    |
| C4BPB    | AMPD3    | ASNA1    |
| C5       | AMY1A    | ASNS     |

|        |         |          |
|--------|---------|----------|
| C5AR1  | ANG     | ASS1     |
| C6     | ANK1    | ATIC     |
| C7     | ANK3    | ATP1A1   |
| C8A    | ANKFY1  | ATP1B1   |
| C8B    | ANKRD2  | ATP1B3   |
| C8G    | ANKRD44 | ATP2B1   |
| C9     | ANO10   | ATP2B4   |
| CA1    | ANPEP   | ATP5F1A  |
| CA2    | ANTXR2  | ATP5F1B  |
| CALML5 | ANXA1   | ATP6V0A1 |
| CALR   | ANXA11  | ATP6V0D1 |
| CAMP   | ANXA2   | ATP6V1A  |
| CAP1   | ANXA3   | ATP6V1B2 |
| CAPN1  | ANXA4   | ATP6V1C1 |
| CAPN5  | ANXA5   | ATP6V1E1 |
| CAPZA1 | ANXA6   | ATP6V1H  |
| CAPZA2 | ANXA7   | ATRN     |
| CAPZB  | AOC3    | ATXN2L   |
| CASP14 | AP1B1   | B2M      |
| CAT    | AP2A1   | BAG2     |
| CCT2   | AP2B1   | BAG5     |
| CCT3   | AP2M1   | BAIAP2   |
| CCT4   | APCS    | BAIAP2L1 |
| CCT5   | APEH    | BANF1    |
| CCT6A  | APMAP   | BASP1    |
| CCT7   | APOA1   | BLVRA    |
| CCT8   | APOA2   | BPNT1    |
| CD14   | APOA4   | BROX     |
| CD2AP  | APOA5   | BSG      |
| CD36   | APOB    | BTN2A1   |

|         |         |          |
|---------|---------|----------|
| CD44    | APOC1   | C5       |
| CD59    | APOC2   | C9       |
| CD5L    | APOC3   | CAB39    |
| CD81    | APOD    | CACNA2D1 |
| CD82    | APOE    | CACYBP   |
| CD9     | APOF    | CAD      |
| CDC42   | APOH    | CADM1    |
| CFB     | APOL1   | CALM1    |
| CFD     | APOM    | CALR     |
| CFH     | APRT    | CALU     |
| CFHR1   | AQP1    | CAND1    |
| CFHR2   | ARCN1   | CANX     |
| CFHR3   | ARF1    | CAP1     |
| CFHR5   | ARF4    | CAPG     |
| CFI     | ARF5    | CAPN1    |
| CFL1    | ARF6    | CAPN2    |
| CFP     | ARG1    | CAPN5    |
| CHMP4A  | ARHGAP1 | CAPNS1   |
| CHMP4B  | ARHGDIA | CAPZA1   |
| CLEC3B  | ARHGDIB | CAPZA2   |
| CLIC1   | ARHGEF1 | CAPZB    |
| CLTA    | ARL15   | CASK     |
| CLTC    | ARL6IP5 | CBR1     |
| CLU     | ARL8B   | CC2D1B   |
| CNDP1   | ARPC1B  | CCDC50   |
| COASY   | ARPC2   | CCDC66   |
| COL1A2  | ARPC3   | CCT2     |
| COL6A1  | ARPC4   | CCT3     |
| COL6A3  | ARPC5   | CCT4     |
| COLEC11 | ARRB2   | CCT5     |

|          |          |         |
|----------|----------|---------|
| COMP     | ART4     | CCT6A   |
| CORO1A   | ASAH1    | CCT7    |
| CORO1C   | ASAP1    | CCT8    |
| CP       | ASNA1    | CD109   |
| CPB2     | ASPH     | CD151   |
| CPN1     | ASPN     | CD276   |
| CPN2     | ASS1     | CD2AP   |
| CPNE1    | ATIC     | CD36    |
| CRP      | ATL3     | CD44    |
| CSTA     | ATP11B   | CD46    |
| CYBB     | ATP11C   | CD47    |
| CYFIP2   | ATP1A1   | CD55    |
| DBH      | ATP1B3   | CD59    |
| DCD      | ATP2A1   | CD63    |
| DDX3X    | ATP2A2   | CD81    |
| DERA     | ATP2A3   | CD82    |
| DPP4     | ATP2B1   | CD9     |
| DSC1     | ATP2B4   | CD97    |
| DSG1     | ATP5A1   | CD99    |
| DSP      | ATP5B    | CDC37   |
| DSTN     | ATP5F1   | CDC42   |
| DYNC1H1  | ATP5H    | CDH13   |
| ECD      | ATP5O    | CDH2    |
| ECM1     | ATP6V0A1 | CDK1    |
| EEF1A1P5 | ATP6V0D1 | CEACAM1 |
| EEF2     | ATP6V1A  | CEP55   |
| EFEMP1   | ATP6V1B2 | CFB     |
| EHD1     | ATP6V1E1 | CFL1    |
| EHD2     | ATP6V1G1 | CFL2    |
| EIF5A    | ATP7A    | CHMP1A  |

|         |          |         |
|---------|----------|---------|
| EMILIN1 | ATP8A1   | CHMP1B  |
| ENO1    | ATRN     | CHMP2A  |
| EPB41   | AZGP1    | CHMP2B  |
| EPB42   | AZU1     | CHMP3   |
| EPHX1   | B2M      | CHMP4A  |
| EPS8    | BAG2     | CHMP4B  |
| F10     | BANF1    | CHMP5   |
| F11     | BASP1    | CIT     |
| F11R    | BCAM     | CLDND1  |
| F12     | BCAP31   | CLIC1   |
| F13A1   | BCHE     | CLIC4   |
| F13B    | BGN      | CLTA    |
| F2      | BIN1     | CLTC    |
| F5      | BLMH     | CMPK1   |
| F8      | BLVRA    | CNDP2   |
| F9      | BLVRB    | CNP     |
| FABP5   | BMP2K    | CNRIP1  |
| FAM151A | BNIP1    | COL12A1 |
| FBLN1   | BOLA2    | COL18A1 |
| FBN1    | BPGM     | COL4A2  |
| FCGBP   | BPI      | COL6A1  |
| FCGR2A  | BRK1     | COL6A2  |
| FCGR3B  | BSG      | COL6A3  |
| FCN1    | BST1     | COMT    |
| FCN2    | BTD      | COPA    |
| FCN3    | C10orf54 | COPB1   |
| FERMT3  | C1QA     | COPB2   |
| FETUB   | C1QB     | COPG1   |
| FGA     | C1QC     | COPS4   |
| FGB     | C1R      | COPS5   |

|        |         |         |
|--------|---------|---------|
| FGG    | C1S     | CORO1B  |
| FGL1   | C2      | CORO1C  |
| FLG    | C2CD2L  | COTL1   |
| FLNA   | C2orf88 | CPB2    |
| FLNC   | C3      | CPM     |
| FLOT1  | C4A     | CPNE1   |
| FLOT2  | C4B     | CPNE3   |
| FN1    | C4BPA   | CPNE8   |
| FTL    | C4BPB   | CPSF6   |
| GANAB  | C5      | CRIP2   |
| GAPDH  | C5AR1   | CRYZ    |
| GC     | C6      | CSF2RA  |
| GDI2   | C7      | CSNK1A1 |
| GGT1   | C8A     | CSNK1G2 |
| GLIPR2 | C8B     | CSNK2A3 |
| GNAI2  | C8G     | CSPG4   |
| GNAQ   | C9      | CSRP1   |
| GNB1   | CA1     | CSTB    |
| GNB2   | CA2     | CTHRC1  |
| GNB2L1 | CA3     | CTNNA1  |
| GOT2   | CA4     | CTNNB1  |
| GP1BB  | CAD     | CTNND1  |
| GP9    | CALML5  | CTSD    |
| GPI    | CALR    | CTTN    |
| GPLD1  | CALU    | CUL3    |
| GPRC5C | CAMK2G  | CUTA    |
| GPX3   | CAMP    | CXADR   |
| GSN    | CAND1   | CYFIP1  |
| GYPA   | CANX    | DAAM2   |
| HABP2  | CAP1    | DAG1    |



|           |         |         |
|-----------|---------|---------|
| HBA1      | CAPG    | DARS    |
| HBB       | CAPN1   | DBN1    |
| HBD       | CAPN5   | DCBLD2  |
| HBG1      | CAPNS1  | DDB1    |
| HGS       | CAPZA1  | DDX1    |
| HIST1H1C  | CAPZA2  | DDX39B  |
| HIST1H2AJ | CAPZB   | DDX3X   |
| HIST1H2BL | CARHSP1 | DHX9    |
| HIST1H4A  | CARM1   | DIP2A   |
| HIST2H3A  | CASQ1   | DIP2B   |
| HLA-A     | CASQ2   | DIP2C   |
| HLA-A     | CAST    | DLG1    |
| HLA-B     | CAT     | DMBT1   |
| HLA-B     | CAV1    | DNAJA1  |
| HLA-C     | CAV2    | DNAJA2  |
| HLA-C     | CBR1    | DNAJA4  |
| HLA-DRA   | CCS     | DNAJB1  |
| HMBS      | CCT2    | DNAJC13 |
| HNRNPA2B1 | CCT3    | DNAJC5  |
| HNRNPC    | CCT4    | DNAJC7  |
| HNRNPD    | CCT5    | DNM1L   |
| HNRNPK    | CCT6A   | DNM2    |
| HNRNPU    | CCT7    | DNPEP   |
| HP        | CCT8    | DOCK10  |
| HPR       | CD101   | DPYSL2  |
| HPX       | CD14    | DPYSL5  |
| HRG       | CD163   | DSG1    |
| HRNR      | CD177   | DSG2    |
| HSP90AA1  | CD2AP   | DSTN    |
| HSP90AB1  | CD33    | DYNC1H1 |

|            |         |         |
|------------|---------|---------|
| HSP90B1    | CD34    | DYNC112 |
| HSPA1B     | CD36    | DYNLL1  |
| HSPA4      | CD38    | DYNLL2  |
| HSPA5      | CD44    | ECE1    |
| HSPA8      | CD46    | ECM1    |
| HSPB1      | CD47    | EDIL3   |
| HSPD1      | CD55    | EDNRB   |
| HSPE1      | CD58    | EEA1    |
| HSPG2      | CD59    | EEF1A1  |
| ICAM3      | CD5L    | EEF1A2  |
| IGFALS     | CD63    | EEF1B2  |
| IGHA1      | CD81    | EEF1D   |
| IGHA2      | CD82    | EEF1G   |
| IGHD       | CD9     | EEF2    |
| IGHG1      | CD93    | EFNB2   |
| IGHG2      | CD97    | EHD1    |
| IGHG3      | CD99    | EHD2    |
| IGHG4      | CDA     | EHD3    |
| IGHM       | CDC42   | EHD4    |
| IGHV1-18   | CDH5    | EIF1AX  |
| IGHV1-3    | CEACAM1 | EIF2S3  |
| IGHV1-69-2 | CEACAM8 | EIF3A   |
| IGHV2-26   | CES1    | EIF3B   |
| IGHV3-15   | CETP    | EIF3C   |
| IGHV3-21   | CFB     | EIF3D   |
| IGHV3-23   | CFD     | EIF3E   |
| IGHV3-43   | CFH     | EIF3F   |
| IGHV3-49   | CFHR1   | EIF3L   |
| IGHV3-64   | CFHR2   | EIF4A1  |
| IGHV3-66   | CFHR3   | EIF4A2  |

|           |         |         |
|-----------|---------|---------|
| IGHV3-72  | CFHR5   | EIF4A3  |
| IGHV3-73  | CFI     | EIF5A   |
| IGHV3-74  | CFL1    | EIF6    |
| IGHV4-28  | CFL2    | EMILIN1 |
| IGHV4-4   | CFP     | EMILIN2 |
| IGHV5-51  | CHI3L1  | EML2    |
| IGHV6-1   | CHIT1   | ENAH    |
| IGJ       | CHMP4B  | ENG     |
| IGKC      | CHP1    | ENO1    |
| IGKV1-12  | CILP    | ENO2    |
| IGKV1-5   | CISD2   | ENPP1   |
| IGKV1-6   | CKAP4   | EPB41L2 |
| IGKV1-8   | CKB     | EPB41L3 |
| IGKV1D-13 | CKM     | EPHA2   |
| IGKV1D-8  | CKMT2   | EPHA3   |
| IGKV2-24  | CLEC12A | EPHX1   |
| IGKV2-40  | CLEC3B  | EPRS    |
| IGKV2D-28 | CLIC1   | ERBIN   |
| IGKV2D-29 | CLNS1A  | ESD     |
| IGKV3D-11 | CLTA    | ESYT1   |
| IGKV4-1   | CLTB    | EVA1A   |
| IGLL1     | CLTC    | EVA1B   |
| IGLL5     | CLU     | EXOC4   |
| IGLV3-10  | CMBL    | EXT1    |
| IGLV3-9   | CMPK1   | EZR     |
| IGLV4-69  | CNDP1   | F11R    |
| IGLV7-46  | CNP     | F13A1   |
| IGLV8-61  | CNPY3   | F2      |
| IGLV9-49  | COL12A1 | F5      |
| ILK       | COL14A1 | FABP5   |

|        |          |         |
|--------|----------|---------|
| IPO5   | COL15A1  | FAM126A |
| ITGA2B | COL18A1  | FAM129B |
| ITGA6  | COL1A1   | FAM234A |
| ITGAL  | COL1A2   | FAM49B  |
| ITGAM  | COL3A1   | FARP1   |
| ITGB1  | COL6A1   | FASN    |
| ITGB2  | COL6A2   | FAT1    |
| ITGB3  | COL6A3   | FERMT2  |
| ITIH1  | COLEC11  | FERMT3  |
| ITIH2  | COLGALT1 | FGA     |
| ITIH3  | COMP     | FGG     |
| ITIH4  | COMT     | FH      |
| KLKB1  | COPA     | FKBP1A  |
| KNG1   | COPB1    | FLG2    |
| KPNB1  | COPB2    | FLNA    |
| KPRP   | COPG1    | FLNB    |
| KRT1   | COPS2    | FLOT1   |
| KRT10  | COPS3    | FLOT2   |
| KRT13  | COPS4    | FMNL2   |
| KRT14  | COPS5    | FN1     |
| KRT16  | COPS6    | FTH1    |
| KRT17  | COPS8    | FZD7    |
| KRT2   | CORO1A   | G6PD    |
| KRT4   | CORO1C   | GALE    |
| KRT5   | CORO7    | GALK1   |
| KRT6B  | COTL1    | GANAB   |
| KRT73  | COX4I1   | GAP43   |
| KRT77  | COX5A    | GAPDH   |
| KRT78  | COX5B    | GARS    |
| KRT9   | CP       | GART    |

|          |         |        |
|----------|---------|--------|
| LAMP1    | CPB1    | GDF15  |
| LBP      | CPB2    | GDI1   |
| LCP1     | CPM     | GDI2   |
| LDHA     | CPN1    | GFPT1  |
| LDHB     | CPN2    | GIPC1  |
| LGALS3   | CPNE1   | GJA1   |
| LGALS3BP | CPNE2   | GJC1   |
| LPA      | CPNE3   | GLG1   |
| LRG1     | CPPED1  | GLO1   |
| LRP1     | CPT1A   | GLRX3  |
| LTBP1    | CR1     | GMPPB  |
| LTF      | CRISP3  | GMPR   |
| LUM      | CRKL    | GMPS   |
| LYN      | CRLF3   | GNA11  |
| LYZ      | CRP     | GNA13  |
| MASP1    | CRTAC1  | GNAI1  |
| MASP2    | CRYAB   | GNAI2  |
| MBL2     | CS      | GNAI3  |
| MDH2     | CSNK1A1 | GNAO1  |
| MFGE8    | CSNK2B  | GNAQ   |
| MME      | CSRP3   | GNAS   |
| MMP8     | CST3    | GNB1   |
| MMP9     | CSTA    | GNB2   |
| MMRN1    | CSTB    | GNB4   |
| MPO      | CTPS1   | GNG12  |
| MPP1     | CTSB    | GOLGA7 |
| MSN      | CTSD    | GOT1   |
| MVP      | CTSG    | GPC1   |
| MYBPC1   | CTSS    | GPI    |
| MYH1     | CUL1    | GPM6B  |

|         |        |           |
|---------|--------|-----------|
| MYH2    | CUL2   | GPNMB     |
| MYH3    | CXCL8  | GPRC5A    |
| MYH7    | CXCR1  | GPRC5B    |
| MYH9    | CYB5A  | GRB2      |
| MYL1    | CYB5R3 | GSN       |
| MYL12A  | CYBA   | GSPT1     |
| MYL6    | CYBB   | GSTO1     |
| MYLPF   | CYBRD1 | GSTP1     |
| MYOM1   | CYCS   | GSTZ1     |
| NACA    | CYFIP2 | GYPC      |
| NAP1L1  | CYP4F3 | H2AFV     |
| NAPA    | DAAM1  | H2AFY     |
| NCL     | DAK    | HBD       |
| NID1    | DARS   | HBZ       |
| NME1    | DBH    | HEBP1     |
| NME2    | DBNL   | HEG1      |
| NPM1    | DCD    | HEXB      |
| NT5E    | DCN    | HGFAC     |
| OIT3    | DCTN1  | HGS       |
| OLFM4   | DCTN2  | HIC2      |
| ORM1    | DCXR   | HINT1     |
| ORM2    | DDAH2  | HIST1H1B  |
| P4HB    | DDB1   | HIST1H1E  |
| PCBP1   | DDI2   | HIST1H2AJ |
| PDCD6   | DDOST  | HIST1H4A  |
| PDCD6IP | DDT    | HIST2H2BE |
| PDIA3   | DDX39A | HIST2H3A  |
| PECAM1  | DDX3X  | HLA-A     |
| PF4     | DECR1  | HLA-B     |
| PFKL    | DEFA1  | HLA-C     |

|         |          |           |
|---------|----------|-----------|
| PFN1    | DERA     | HLA-DPA1  |
| PGK1    | DES      | HLA-DPB1  |
| PGLYRP2 | DHRS7    | HLA-DRA   |
| PHB     | DHX15    | HLA-DRB1  |
| PIGR    | DIAPH1   | HLA-DRB3  |
| PIP     | DLST     | HNRNPA1   |
| PKM     | DMTN     | HNRNPA3   |
| PLEK    | DNAJA2   | HNRNPD    |
| PLG     | DNAJA4   | HNRNPH1   |
| PLTP    | DNAJB11  | HNRNPK    |
| PNP     | DNAJB2   | HNRNPL    |
| PON1    | DNAJC13  | HNRNPU    |
| PPIA    | DNAJC5   | HP        |
| PRDX1   | DNM2     | HPCAL1    |
| PRDX2   | DNPEP    | HPRT1     |
| PRDX6   | DOCK2    | HRNR      |
| PRG4    | DOCK8    | HSP90AA1  |
| PRKAR1A | DPYSL2   | HSP90AB1  |
| PRKDC   | DPYSL3   | HSP90AB2P |
| PRMT5   | DSTN     | HSP90B1   |
| PROS1   | DYNC1H1  | HSPA1A    |
| PROZ    | DYNLL1   | HSPA2     |
| PSMA1   | DYSF     | HSPA4     |
| PSMA2   | ECD      | HSPA5     |
| PSMA3   | ECH1     | HSPA6     |
| PSMA4   | ECHS1    | HSPA8     |
| PSMA5   | ECM1     | HSPA9     |
| PSMA6   | EEF1A1P5 | HSPB1     |
| PSMA7   | EEF1A2   | HSPD1     |
| PSMB6   | EEF1D    | HSPG2     |

|        |         |         |
|--------|---------|---------|
| PSMB7  | EEF1G   | HSPH1   |
| PSMD2  | EEF2    | HTRA1   |
| PTBP1  | EFEMP1  | HYOU1   |
| PTPRC  | EFHD2   | IARS    |
| PTPRJ  | EFTUD2  | ICAM1   |
| PYGL   | EHD1    | IDH1    |
| PYGM   | EHD2    | IFITM3  |
| PZP    | EHD3    | IGF1R   |
| QSOX1  | EHD4    | IGF2BP2 |
| RAB10  | EIF2S1  | IGF2R   |
| RAB1B  | EIF2S3  | IGLL5   |
| RAB3D  | EIF3A   | IGSF3   |
| RAB7A  | EIF4A1  | IGSF8   |
| RAC2   | EIF4A3  | IL1RAP  |
| RAN    | EIF4B   | ILF2    |
| RAP1B  | EIF5A   | ILF3    |
| RAP2B  | EIF6    | ILK     |
| RBP4   | ELANE   | IMPDH2  |
| RELN   | ELMO1   | INCENP  |
| RHCE   | ELMOD2  | IPO5    |
| RHOA   | EMB     | IPO7    |
| RPL18A | EMILIN1 | IQGAP1  |
| RPL23  | EMR3    | IST1    |
| RPL27  | ENDOD1  | ITCH    |
| RPLP0  | ENO1    | ITGA1   |
| RPLP2  | ENO3    | ITGA2   |
| RPS16  | EPB41   | ITGA3   |
| RPS18  | EPB41L2 | ITGA4   |
| RPS2   | EPB42   | ITGA5   |
| RPS7   | EPHX1   | ITGA6   |



|           |        |         |
|-----------|--------|---------|
| RSU1      | EPRS   | ITGAV   |
| S100A12   | EPX    | ITGB1   |
| S100A6    | ERAP1  | ITGB3   |
| S100A7    | ERGIC1 | ITGB5   |
| S100A8    | ERLIN1 | ITGB8   |
| S100A9    | ERLIN2 | ITM2C   |
| SAA1      | ERMAP  | JAM3    |
| SAA2      | ERO1L  | JCHAIN  |
| SAA4      | ERP29  | KIF23   |
| SDCBP     | ERP44  | KIF5B   |
| SDPR      | ESD    | KIRREL1 |
| SEPP1     | ESYT1  | KLC1    |
| SERPINA1  | ESYT2  | KPNA2   |
| SERPINA10 | ETFA   | KPNA4   |
| SERPINA3  | EVI2B  | KPNB1   |
| SERPINA4  | EZR    | KRAS    |
| SERPINA6  | F10    | KRT1    |
| SERPINA7  | F11    | KRT10   |
| SERPINB1  | F11R   | KRT14   |
| SERPINC1  | F12    | KRT16   |
| SERPIND1  | F13A1  | KRT2    |
| SERPINF1  | F13B   | KRT5    |
| SERPINF2  | F2     | KRT6A   |
| SERPING1  | F5     | KRT9    |
| SLC1A5    | F8     | KTN1    |
| SLC25A5   | F9     | L1CAM   |
| SLC2A1    | FABP3  | LAMA4   |
| SLC2A3    | FABP4  | LAMB1   |
| SLC3A2    | FABP5  | LAMC1   |
| SLC44A1   | FAH    | LAMP1   |

|        |         |          |
|--------|---------|----------|
| SLC4A1 | FAM129A | LAMP2    |
| SNAP23 | FAM213A | LAMTOR1  |
| SNCA   | FAM49B  | LAMTOR3  |
| SNRPD3 | FAS     | LANCL1   |
| SPN    | FASN    | LAP3     |
| SPP2   | FBLN1   | LDHA     |
| SPTA1  | FBLN2   | LDHB     |
| SPTAN1 | FBN1    | LDLR     |
| SPTB   | FBXO7   | LGALS1   |
| SRI    | FCAR    | LGALS3   |
| SRSF2  | FCER1G  | LGALS3BP |
| ST13   | FCGBP   | LHFPL2   |
| STAM   | FCGR1A  | LIMS1    |
| STEAP3 | FCGR2A  | LIN7C    |
| STIP1  | FCGR3A  | LMBRD1   |
| STOM   | FCGR3B  | LMNA     |
| STX7   | FCGRT   | LOXL2    |
| STXBP2 | FCN1    | LPP      |
| SVEP1  | FCN2    | LRP1     |
| TAGLN2 | FCN3    | LRRC59   |
| TCP1   | FERMT2  | LSAMP    |
| TF     | FERMT3  | LSR      |
| TFRC   | FETUB   | LTA4H    |
| TGFB1  | FGA     | LY6E     |
| TGFBI  | FGB     | LYN      |
| TGM2   | FGG     | LYPLA1   |
| THBS1  | FGL2    | LYPLA2   |
| THBS4  | FGR     | M6PR     |
| TIMP1  | FH      | MAGED2   |
| TKT    | FHL1    | MAP2K1   |

|         |        |          |
|---------|--------|----------|
| TLN1    | FKBP15 | MAP4K4   |
| TMED10  | FKBP2  | MAPK1    |
| TMED7   | FLG    | MAPRE1   |
| TNC     | FLNA   | MARCKS   |
| TNXB    | FLNB   | MARCKSL1 |
| TPI1    | FLNC   | MARS     |
| TPM1    | FLOT1  | MAT2A    |
| TPM3    | FLOT2  | MCAM     |
| TPM4    | FMNL1  | MDH1     |
| TPP2    | FMOD   | MDH2     |
| TRIM58  | FN1    | MDK      |
| TSG101  | FN3K   | MELTF    |
| TSPAN14 | FN3KRP | MFAP4    |
| TTN     | FOLR3  | MFGE8    |
| TTR     | FPR1   | MFSD12   |
| TUBA1B  | FSCN1  | MGRN1    |
| TUBA4A  | FTH1   | MICAL1   |
| TUBB    | FTL    | MICALL1  |
| TUBB1   | G6PD   | MIF      |
| TUBB4B  | GANAB  | MINK1    |
| TXN     | GAPDH  | MITD1    |
| TYMP    | GAPVD1 | MLANA    |
| UBA1    | GBE1   | MME      |
| UBA52   | GC     | MMP14    |
| USP9X   | GCA    | MOB1A    |
| VAMP3   | GCLC   | MOV10    |
| VASP    | GCLM   | MPP1     |
| VCL     | GDE1   | MPP6     |
| VCP     | GDI1   | MPZL1    |
| VIM     | GDI2   | MSN      |

|        |        |         |
|--------|--------|---------|
| VNN1   | GGT1   | MTHFD1  |
| VPS13A | GGT5   | MTPN    |
| VPS28  | GIT2   | MVB12A  |
| VPS37C | GLG1   | MVB12B  |
| VTA1   | GLIPR2 | MVP     |
| VTN    | GLO1   | MYH10   |
| VWF    | GLOD4  | MYH9    |
| WBP2   | GLRX   | MYL12A  |
| WDR1   | GLRX3  | MYL6    |
| WDR77  | GLUD1  | MYO10   |
| XPO1   | GLUL   | MYO1B   |
| XRCC6  | GMFG   | MYO1C   |
| YWHAB  | GMPPA  | MYO1D   |
| YWHAE  | GMPPB  | MYO1E   |
| YWHAG  | GMPR   | MYO5A   |
| YWHAH  | GNA13  | MYOF    |
| YWHAQ  | GNAI2  | NAMPT   |
| YWHAZ  | GNAI3  | NANS    |
| ZYX    | GNAQ   | NAP1L1  |
|        | GNAS   | NAP1L4  |
|        | GNB1   | NAPA    |
|        | GNB2   | NCAM1   |
|        | GNB2L1 | NCKAP1  |
|        | GNB4   | NCS1    |
|        | GNG10  | NCSTN   |
|        | GNG12  | NDRG3   |
|        | GNG2   | NECTIN3 |
|        | GNG5   | NEDD4   |
|        | GOLGA7 | NEDD4L  |
|        | GOT1   | NGFR    |

|  |       |         |
|--|-------|---------|
|  | GOT2  | NHLRC2  |
|  | GP1BB | NME1    |
|  | GP9   | NME2    |
|  | GPD1  | NOTCH2  |
|  | GPI   | NPC1    |
|  | GPLD1 | NPEPPS  |
|  | GNMB  | NPM1    |
|  | GPR97 | NPTN    |
|  | GPSM3 | NQO1    |
|  | GPX1  | NRAS    |
|  | GPX3  | NRP1    |
|  | GPX4  | NRP2    |
|  | GRB2  | NT5E    |
|  | GRHPR | NTM     |
|  | GRK6  | NUDC    |
|  | GRN   | NUTF2   |
|  | GSN   | OCA2    |
|  | GSR   | OLA1    |
|  | GSTM1 | ORAI1   |
|  | GSTM2 | OSTF1   |
|  | GSTM3 | OTUB1   |
|  | GSTO1 | OTUD7B  |
|  | GSTP1 | P2RX4   |
|  | GUK1  | P2RX7   |
|  | GYG1  | P4HB    |
|  | GYPA  | PA2G4   |
|  | GYPC  | PABPC1  |
|  | GYS1  | PABPC4  |
|  | H1F0  | PACSIN2 |
|  | H1FX  | PACSIN3 |

|  |           |          |
|--|-----------|----------|
|  | H2AFV     | PAFAH1B1 |
|  | H2AFY     | PAFAH1B2 |
|  | H3F3A     | PAFAH1B3 |
|  | H6PD      | PAG1     |
|  | HABP2     | PAICS    |
|  | HADHA     | PAK2     |
|  | HADHB     | PAPPA    |
|  | HAGH      | PARK7    |
|  | HBA1      | PCBP1    |
|  | HBB       | PCBP2    |
|  | HBD       | PCDHGC3  |
|  | HBG1      | PCMT1    |
|  | HBG2      | PCNA     |
|  | HBM       | PDCD6    |
|  | HBQ1      | PDCD6IP  |
|  | HCK       | PDIA3    |
|  | HDGF      | PDIA4    |
|  | HECTD3    | PDIA6    |
|  | HGFAC     | PEA15    |
|  | HGS       | PEBP1    |
|  | HIDE1     | PEF1     |
|  | HINT1     | PELI2    |
|  | HIST1H1B  | PEPD     |
|  | HIST1H1C  | PFAS     |
|  | HIST1H2AJ | PFKL     |
|  | HIST1H2BL | PFKM     |
|  | HIST1H3A  | PFKP     |
|  | HIST1H4A  | PFN1     |
|  | HIST2H2AB | PGAM1    |
|  | HIST2H3A  | PGD      |

|  |           |         |
|--|-----------|---------|
|  | HK3       | PGK1    |
|  | HLA-A     | PGLS    |
|  | HLA-A     | PGM1    |
|  | HLA-A     | PHB2    |
|  | HLA-A     | PHGDH   |
|  | HLA-A     | PI4K2A  |
|  | HLA-B     | PI4KA   |
|  | HLA-B     | PICALM  |
|  | HLA-B     | PITPNA  |
|  | HLA-B     | PITPNB  |
|  | HLA-C     | PKM     |
|  | HLA-C     | PLAT    |
|  | HLA-DRA   | PLAUR   |
|  | HLA-DRB1  | PLD3    |
|  | HLA-DRB1  | PLEC    |
|  | HMBS      | PLEKHB2 |
|  | HMGB1     | PLP1    |
|  | HMGB2     | PLS3    |
|  | HMHA1     | PLSCR3  |
|  | HNRNPA1   | PLXNA1  |
|  | HNRNPA2B1 | PLXNB2  |
|  | HNRNPA3   | PLXNC1  |
|  | HNRNPAB   | PMEL    |
|  | HNRNPC    | PPA1    |
|  | HNRNPD    | PPFIBP1 |
|  | HNRNPH1   | PPIA    |
|  | HNRNPK    | PPIB    |
|  | HNRNPL    | PPID    |
|  | HNRNPU    | PPIH    |
|  | HP        | PPME1   |

|  |          |         |
|--|----------|---------|
|  | HP1BP3   | PPP1CA  |
|  | HPR      | PPP1CB  |
|  | HPRT1    | PPP1CC  |
|  | HPX      | PPP2CA  |
|  | HRG      | PPP2R1A |
|  | HRNR     | PPP2R2A |
|  | HSD17B11 | PPP2R5D |
|  | HSD17B12 | PRDX1   |
|  | HSD17B4  | PRDX2   |
|  | HSP90AA1 | PRDX6   |
|  | HSP90AB1 | PRKAR1A |
|  | HSP90B1  | PRKDC   |
|  | HSPA12A  | PRKG2   |
|  | HSPA1B   | PRMT1   |
|  | HSPA2    | PRNP    |
|  | HSPA4    | PROCR   |
|  | HSPA5    | PRPS1   |
|  | HSPA6    | PRSS23  |
|  | HSPA8    | PRSS3P2 |
|  | HSPA9    | PSAT1   |
|  | HSPB1    | PSCA    |
|  | HSPB2    | PSMA1   |
|  | HSPB6    | PSMA2   |
|  | HSPD1    | PSMA3   |
|  | HSPE1    | PSMA4   |
|  | HSPG2    | PSMA5   |
|  | HVCN1    | PSMA6   |
|  | HYOU1    | PSMA7   |
|  | ICAM3    | PSMB1   |
|  | ICAM4    | PSMB4   |



|  |            |         |
|--|------------|---------|
|  | IDH1       | PSMB5   |
|  | IDH2       | PSMC1   |
|  | IFITM2     | PSMC2   |
|  | IGF2R      | PSMC3   |
|  | IGFALS     | PSMC4   |
|  | IGHA1      | PSMC5   |
|  | IGHA2      | PSMC6   |
|  | IGHD       | PSMD1   |
|  | IGHG1      | PSMD11  |
|  | IGHG2      | PSMD12  |
|  | IGHG3      | PSMD13  |
|  | IGHG4      | PSMD2   |
|  | IGHM       | PSMD3   |
|  | IGHV1-18   | PSMD5   |
|  | IGHV1-69-2 | PSMD6   |
|  | IGHV2-26   | PSMD7   |
|  | IGHV3-15   | PSMD8   |
|  | IGHV3-23   | PSME1   |
|  | IGHV3-49   | PSME2   |
|  | IGHV3-64   | PTGES3  |
|  | IGHV3-72   | PTGFRN  |
|  | IGHV3-73   | PTK7    |
|  | IGHV3-74   | PTP4A2  |
|  | IGHV4-28   | PTPN23  |
|  | IGHV4-4    | PTPRA   |
|  | IGHV5-51   | PTPRF   |
|  | IGHV6-1    | PTPRG   |
|  | IGJ        | PTPRJ   |
|  | IGKC       | PTPRS   |
|  | IGKV1-12   | PTTG1IP |

|  |           |         |
|--|-----------|---------|
|  | IGKV1-27  | PTX3    |
|  | IGKV1-5   | PVR     |
|  | IGKV1-6   | PXDN    |
|  | IGKV1-8   | PYGB    |
|  | IGKV1D-13 | PYGL    |
|  | IGKV1D-8  | QDPR    |
|  | IGKV2-24  | RAB10   |
|  | IGKV2-40  | RAB11B  |
|  | IGKV2D-28 | RAB13   |
|  | IGKV2D-29 | RAB14   |
|  | IGKV3D-11 | RAB1A   |
|  | IGKV4-1   | RAB1B   |
|  | IGLL1     | RAB21   |
|  | IGLL5     | RAB22A  |
|  | IGLV3-10  | RAB27A  |
|  | IGLV3-9   | RAB2A   |
|  | IGLV4-69  | RAB32   |
|  | IGLV7-46  | RAB34   |
|  | IGLV8-61  | RAB35   |
|  | IGLV9-49  | RAB38   |
|  | ILK       | RAB5B   |
|  | ILVBL     | RAB5C   |
|  | IMPDH1    | RAB6A   |
|  | IMPDH2    | RAB7A   |
|  | IPO5      | RAB8A   |
|  | IPO7      | RAB8B   |
|  | IPO9      | RAB9A   |
|  | IQGAP1    | RAC1    |
|  | IQGAP2    | RACGAP1 |
|  | ISOC1     | RACK1   |

|  |        |        |
|--|--------|--------|
|  | ITGA2B | RALA   |
|  | ITGA5  | RALB   |
|  | ITGA6  | RAN    |
|  | ITGA7  | RANBP1 |
|  | ITGAL  | RAP1A  |
|  | ITGAM  | RAP1B  |
|  | ITGAV  | RAP2A  |
|  | ITGAX  | RAP2B  |
|  | ITGB1  | RAP2C  |
|  | ITGB2  | RARS   |
|  | ITGB3  | RBBP4  |
|  | ITIH1  | RBM3   |
|  | ITIH2  | RDX    |
|  | ITIH3  | RELL1  |
|  | ITIH4  | RGS20  |
|  | KCMF1  | RHBDF1 |
|  | KCNAB2 | RHOA   |
|  | KCNN4  | RHOC   |
|  | KEL    | RHOG   |
|  | KLHL41 | RNF149 |
|  | KLKB1  | RNH1   |
|  | KNG1   | RNPEP  |
|  | KPNA4  | ROBO1  |
|  | KPNB1  | ROR1   |
|  | KRT1   | RP2    |
|  | KRT10  | RPL10  |
|  | KRT13  | RPL10A |
|  | KRT14  | RPL11  |
|  | KRT16  | RPL12  |
|  | KRT17  | RPL13  |

|  |          |        |
|--|----------|--------|
|  | KRT2     | RPL13A |
|  | KRT4     | RPL14  |
|  | KRT5     | RPL15  |
|  | KRT6B    | RPL17  |
|  | KRT73    | RPL18  |
|  | KRT9     | RPL18A |
|  | LAMA2    | RPL19  |
|  | LAMA4    | RPL21  |
|  | LAMB2    | RPL23A |
|  | LAMC1    | RPL24  |
|  | LAMP1    | RPL27A |
|  | LAMP2    | RPL28  |
|  | LAMTOR1  | RPL3   |
|  | LAMTOR2  | RPL30  |
|  | LAMTOR5  | RPL32  |
|  | LANCL1   | RPL4   |
|  | LAP3     | RPL5   |
|  | LASP1    | RPL6   |
|  | LBP      | RPL7   |
|  | LBR      | RPL7A  |
|  | LCAT     | RPL8   |
|  | LCN2     | RPL9   |
|  | LCP1     | RPLP0  |
|  | LDB3     | RPLP2  |
|  | LDHA     | RPN1   |
|  | LDHB     | RPS10  |
|  | LGALS1   | RPS11  |
|  | LGALS3   | RPS12  |
|  | LGALS3BP | RPS14  |
|  | LGALS9   | RPS15A |

|  |        |         |
|--|--------|---------|
|  | LILRA3 | RPS16   |
|  | LILRA6 | RPS17   |
|  | LILRB1 | RPS18   |
|  | LILRB2 | RPS2    |
|  | LILRB3 | RPS20   |
|  | LIPE   | RPS23   |
|  | LMAN1  | RPS24   |
|  | LMAN2  | RPS25   |
|  | LMNA   | RPS26   |
|  | LMNB1  | RPS27   |
|  | LNP    | RPS3    |
|  | LNPEP  | RPS3A   |
|  | LPA    | RPS4X   |
|  | LPCAT2 | RPS5    |
|  | LPCAT3 | RPS6    |
|  | LPGAT1 | RPS7    |
|  | LPIN2  | RPS8    |
|  | LRG1   | RPS9    |
|  | LRP1   | RPSA    |
|  | LRRC25 | RRAGC   |
|  | LRRK2  | RRAS    |
|  | LTA4H  | RRAS2   |
|  | LTB4R  | RRM1    |
|  | LTBP1  | RTCB    |
|  | LTF    | RTN4    |
|  | LUM    | RUVBL1  |
|  | LXN    | RUVBL2  |
|  | LYN    | S100A1  |
|  | LYPLA1 | S100A10 |
|  | LYZ    | S100A11 |

|  |          |          |
|--|----------|----------|
|  | M6PR     | S100A13  |
|  | MANF     | S100A6   |
|  | MAOA     | S100B    |
|  | MAOB     | SARS     |
|  | MAP2K1   | SBDS     |
|  | MAP2K3   | SCAMP1   |
|  | MARCKS   | SCAMP2   |
|  | MARCKSL1 | SCAMP3   |
|  | MASP1    | SCAMP4   |
|  | MASP2    | SCARB1   |
|  | MB       | SCARB2   |
|  | MBL2     | SCRIB    |
|  | MBOAT2   | SCRN1    |
|  | MBOAT7   | SDC1     |
|  | MCAM     | SDC2     |
|  | MCEMP1   | SDC4     |
|  | MCTS1    | SDCBP    |
|  | MDH1     | SEC22B   |
|  | MDH2     | SEC23A   |
|  | ME1      | SEC31A   |
|  | MEST     | SEMA7A   |
|  | METTL7A  | SERINC1  |
|  | MFAP4    | SERINC3  |
|  | MFAP5    | SERINC5  |
|  | MFGE8    | SERPINB6 |
|  | MGAM     | SERPINC1 |
|  | MGLL     | SERPINF2 |
|  | MIF      | SERPINH1 |
|  | MINPP1   | SF3B1    |
|  | MLEC     | SFRP1    |

|  | MME    | SGCB     |
|--|--------|----------|
|  | MMP2   | SGCD     |
|  | MMP25  | SH3BP4   |
|  | MMP8   | SH3GL1   |
|  | MMP9   | SH3KBP1  |
|  | MMRN1  | SIRPA    |
|  | MNDA   | SKP1     |
|  | MOGS   | SLC12A2  |
|  | MPO    | SLC16A1  |
|  | MPP1   | SLC16A3  |
|  | MPST   | SLC16A6  |
|  | MRC1   | SLC1A4   |
|  | MRC2   | SLC1A5   |
|  | MSN    | SLC20A1  |
|  | MST1   | SLC23A2  |
|  | MTCH2  | SLC25A6  |
|  | MT-CO2 | SLC26A2  |
|  | MTHFD1 | SLC29A1  |
|  | MTPN   | SLC2A1   |
|  | MUC1   | SLC2A3   |
|  | MUC5B  | SLC30A1  |
|  | MVP    | SLC38A2  |
|  | MYBPC1 | SLC39A10 |
|  | MYBPC2 | SLC39A14 |
|  | MYCBP2 | SLC3A2   |
|  | MYDGF  | SLC43A3  |
|  | MYH1   | SLC44A1  |
|  | MYH10  | SLC4A2   |
|  | MYH14  | SLC4A7   |
|  | MYH2   | SLC5A3   |

|  |         |          |
|--|---------|----------|
|  | MYH4    | SLC5A6   |
|  | MYH7    | SLC6A6   |
|  | MYH9    | SLC6A8   |
|  | MYL1    | SLC7A1   |
|  | MYL12A  | SLC7A11  |
|  | MYL2    | SLC7A5   |
|  | MYL3    | SLC7A8   |
|  | MYL4    | SLC9A3R1 |
|  | MYL5    | SLC9A3R2 |
|  | MYL6    | SMS      |
|  | MYL9    | SMURF2   |
|  | MYLPF   | SNAP23   |
|  | MYO18A  | SND1     |
|  | MYO1C   | SNTB1    |
|  | MYO1F   | SNTB2    |
|  | MYO1G   | SNX2     |
|  | MYOC    | SNX3     |
|  | MYOF    | SNX33    |
|  | MYOM1   | SNX9     |
|  | MYOM2   | SOD1     |
|  | MYOT    | SORT1    |
|  | NACA    | SPTAN1   |
|  | NADSYN1 | SPTBN1   |
|  | NAGK    | SQSTM1   |
|  | NAMPT   | SRC      |
|  | NAP1L1  | SRI      |
|  | NAP1L4  | SRM      |
|  | NAPA    | SRP14    |
|  | NAPRT   | SRP9     |
|  | NBAS    | SRSF3    |



|  |         |          |
|--|---------|----------|
|  | NCEH1   | ST13     |
|  | NCF1    | STAM     |
|  | NCF2    | STAM2    |
|  | NCF4    | STAMBP   |
|  | NCKAP1L | STAT1    |
|  | NCL     | STIP1    |
|  | NDRG1   | STK10    |
|  | NEB     | STK24    |
|  | NID1    | STOM     |
|  | NIF3L1  | STRAP    |
|  | NME1    | STUB1    |
|  | NME2    | STX12    |
|  | NONO    | STX3     |
|  | NPC2    | STX4     |
|  | NPEPPS  | STX7     |
|  | NPM1    | STXBP1   |
|  | NRAS    | STXBP2   |
|  | NRP1    | STXBP3   |
|  | NSF     | SVIP     |
|  | NSFL1C  | SYNCRIP  |
|  | NT5E    | SYPL1    |
|  | NUCB1   | TAGLN2   |
|  | NUCB2   | TALDO1   |
|  | NUTF2   | TAOK1    |
|  | OGN     | TAOK3    |
|  | OLA1    | TARS     |
|  | OLFM4   | TBC1D10A |
|  | OPTN    | TBCA     |
|  | ORM1    | TCP1     |
|  | ORM2    | TENM3    |

|  |          |           |
|--|----------|-----------|
|  | OSTF1    | TFG       |
|  | OTUB1    | TFRC      |
|  | OXR1     | TG        |
|  | P4HB     | TGFBI     |
|  | PA2G4    | TGOLN2    |
|  | PABPC1   | THBS1     |
|  | PADI2    | TIMP3     |
|  | PADI4    | TIPRL     |
|  | PAFAH1B1 | TJP1      |
|  | PAFAH1B2 | TJP2      |
|  | PAFAH1B3 | TKT       |
|  | PAICS    | TLN1      |
|  | PARK7    | TM9SF2    |
|  | PARP4    | TMED10    |
|  | PARVB    | TMEM30A   |
|  | PCBP1    | TMEM59    |
|  | PCBP2    | TNC       |
|  | PCMT1    | TNFRSF10B |
|  | PCOLCE   | TNIK      |
|  | PCYOX1   | TNPO1     |
|  | PDCD6    | TNS3      |
|  | PDCD6IP  | TOLLIP    |
|  | PDIA3    | TOM1      |
|  | PDIA4    | TOM1L1    |
|  | PDIA6    | TP11      |
|  | PDLIM3   | TPM4      |
|  | PDXK     | TPP2      |
|  | PEBP1    | TPT1      |
|  | PECAM1   | TRIP10    |
|  | PEF1     | TRPV2     |

|  |         |         |
|--|---------|---------|
|  | PF4     | TRPV4   |
|  | PFAS    | TSG101  |
|  | PFKL    | TSN     |
|  | PFKM    | TSPAN10 |
|  | PFN1    | TSPAN14 |
|  | PGAM1   | TSPAN3  |
|  | PGAM2   | TSPAN4  |
|  | PGD     | TSPAN6  |
|  | PGK1    | TSPAN9  |
|  | PGLYRP1 | TLL12   |
|  | PGLYRP2 | TTYH2   |
|  | PGM1    | TTYH3   |
|  | PGM2    | TUBA1A  |
|  | PGRMC1  | TUBA1B  |
|  | PGRMC2  | TUBA1C  |
|  | PHB     | TUBA4A  |
|  | PHB2    | TUBB    |
|  | PHGDH   | TUBB1   |
|  | PHKA2   | TUBB2B  |
|  | PHKB    | TUBB3   |
|  | PHPT1   | TUBB4A  |
|  | PI16    | TUBB4B  |
|  | PI4K2A  | TUBB6   |
|  | PIEZO1  | TUBB8   |
|  | PIGR    | TWF1    |
|  | PIP     | TXN     |
|  | PIP4K2A | TXNDC5  |
|  | PITHD1  | TXNL1   |
|  | PKLR    | TYRP1   |
|  | PKM     | UBA1    |

|  |         |         |
|--|---------|---------|
|  | PLAT    | UBA2    |
|  | PLAU    | UBA52   |
|  | PLAUR   | UBASH3B |
|  | PLBD1   | UBE2L3  |
|  | PLEC    | UBE2M   |
|  | PLEK    | UBE2N   |
|  | PLEKHO2 | UBE2V2  |
|  | PLG     | UBTD1   |
|  | PLIN1   | UEVLD   |
|  | PLIN3   | UGDH    |
|  | PLIN4   | UGP2    |
|  | PLSCR1  | ULBP3   |
|  | PLSCR4  | UPF1    |
|  | PLTP    | USP14   |
|  | PLXNC1  | USP5    |
|  | PNP     | USP9X   |
|  | PNPLA6  | UTRN    |
|  | PON1    | VAMP3   |
|  | PON2    | VAMP7   |
|  | POR     | VANGL1  |
|  | POSTN   | VARS    |
|  | PPA1    | VASP    |
|  | PPBP    | VAT1    |
|  | PPIA    | VCAN    |
|  | PPIB    | VCL     |
|  | PPME1   | VCP     |
|  | PPP1CB  | VDAC1   |
|  | PPP1R3D | VIM     |
|  | PPP2CA  | VPS25   |
|  | PPP2R1A | VPS28   |

|  |         |         |
|--|---------|---------|
|  | PPP2R2A | VPS29   |
|  | PPP2R4  | VPS35   |
|  | PRDX1   | VPS37B  |
|  | PRDX2   | VPS4A   |
|  | PRDX3   | VPS4B   |
|  | PRDX5   | VTA1    |
|  | PRDX6   | VTN     |
|  | PRELP   | WARS    |
|  | PRG4    | WASF2   |
|  | PRKACA  | WASL    |
|  | PRKAR1A | WBP2    |
|  | PRKAR2B | WDFY1   |
|  | PRKCB   | WDR1    |
|  | PRKCD   | WDR61   |
|  | PRKCSH  | XPNPEP1 |
|  | PRKDC   | XPO1    |
|  | PRMT5   | YBX1    |
|  | PROC    | YES1    |
|  | PROCR   | YKT6    |
|  | PROM1   | YWHAB   |
|  | PROS1   | YWHAE   |
|  | PROZ    | YWHAG   |
|  | PRPF19  | YWHAH   |
|  | PRPS1   | YWHAQ   |
|  | PRPS2   | YWHAZ   |
|  | PRPSAP1 | ZC3HAV1 |
|  | PRPSAP2 | ZDHHC5  |
|  | PRRC1   | ZYX     |
|  | PRTN3   |         |
|  | PSAP    |         |

|  |        |  |
|--|--------|--|
|  | PSMA1  |  |
|  | PSMA2  |  |
|  | PSMA3  |  |
|  | PSMA4  |  |
|  | PSMA5  |  |
|  | PSMA6  |  |
|  | PSMA7  |  |
|  | PSMB1  |  |
|  | PSMB10 |  |
|  | PSMB2  |  |
|  | PSMB3  |  |
|  | PSMB4  |  |
|  | PSMB5  |  |
|  | PSMB6  |  |
|  | PSMB7  |  |
|  | PSMB8  |  |
|  | PSMB9  |  |
|  | PSMC1  |  |
|  | PSMC2  |  |
|  | PSMC3  |  |
|  | PSMC4  |  |
|  | PSMC5  |  |
|  | PSMC6  |  |
|  | PSMD1  |  |
|  | PSMD10 |  |
|  | PSMD11 |  |
|  | PSMD12 |  |
|  | PSMD13 |  |
|  | PSMD14 |  |
|  | PSMD2  |  |

|  |        |  |
|--|--------|--|
|  | PSMD3  |  |
|  | PSMD4  |  |
|  | PSMD5  |  |
|  | PSMD6  |  |
|  | PSMD7  |  |
|  | PSMD8  |  |
|  | PSMD9  |  |
|  | PSME1  |  |
|  | PSME2  |  |
|  | PSMF1  |  |
|  | PTBP1  |  |
|  | PTGES3 |  |
|  | PTGFRN |  |
|  | PTGIS  |  |
|  | PTPN6  |  |
|  | PTPRC  |  |
|  | PTPRJ  |  |
|  | PTRF   |  |
|  | PTX3   |  |
|  | PURA   |  |
|  | PURB   |  |
|  | PXN    |  |
|  | PYCRL  |  |
|  | PYGB   |  |
|  | PYGL   |  |
|  | PYGM   |  |
|  | PZP    |  |
|  | QDPR   |  |
|  | QPCT   |  |
|  | QSOX1  |  |

|  |        |  |
|--|--------|--|
|  | RAB10  |  |
|  | RAB11B |  |
|  | RAB14  |  |
|  | RAB18  |  |
|  | RAB1A  |  |
|  | RAB1B  |  |
|  | RAB27A |  |
|  | RAB2A  |  |
|  | RAB31  |  |
|  | RAB35  |  |
|  | RAB3D  |  |
|  | RAB5B  |  |
|  | RAB5C  |  |
|  | RAB6B  |  |
|  | RAB7A  |  |
|  | RAB8A  |  |
|  | RAB8B  |  |
|  | RAC1   |  |
|  | RAC2   |  |
|  | RAD23A |  |
|  | RAD23B |  |
|  | RALA   |  |
|  | RALB   |  |
|  | RAN    |  |
|  | RANBP1 |  |
|  | RAP1A  |  |
|  | RAP1B  |  |
|  | RAP2A  |  |
|  | RAP2B  |  |
|  | RAP2C  |  |



|  |        |  |
|--|--------|--|
|  | RARS   |  |
|  | RBP4   |  |
|  | RDH11  |  |
|  | RDH5   |  |
|  | RECQL  |  |
|  | REEP5  |  |
|  | RETN   |  |
|  | RETSAT |  |
|  | RGS19  |  |
|  | RHAG   |  |
|  | RHCE   |  |
|  | RHD    |  |
|  | RHOA   |  |
|  | RHOG   |  |
|  | RILP   |  |
|  | RNASE1 |  |
|  | RNASE3 |  |
|  | RNASE4 |  |
|  | RNF123 |  |
|  | RNH1   |  |
|  | RNPEP  |  |
|  | RP2    |  |
|  | RPA1   |  |
|  | RPA2   |  |
|  | RPA3   |  |
|  | RPL10  |  |
|  | RPL10A |  |
|  | RPL11  |  |
|  | RPL12  |  |
|  | RPL13  |  |

|  |        |  |
|--|--------|--|
|  | RPL14  |  |
|  | RPL15  |  |
|  | RPL18  |  |
|  | RPL18A |  |
|  | RPL22  |  |
|  | RPL23  |  |
|  | RPL28  |  |
|  | RPL3   |  |
|  | RPL30  |  |
|  | RPL32  |  |
|  | RPL4   |  |
|  | RPL5   |  |
|  | RPL6   |  |
|  | RPL7   |  |
|  | RPL7A  |  |
|  | RPL9   |  |
|  | RPLP0  |  |
|  | RPLP2  |  |
|  | RPN1   |  |
|  | RPN2   |  |
|  | RPS11  |  |
|  | RPS12  |  |
|  | RPS14  |  |
|  | RPS15A |  |
|  | RPS16  |  |
|  | RPS18  |  |
|  | RPS2   |  |
|  | RPS23  |  |
|  | RPS26  |  |
|  | RPS3   |  |

|  |         |  |
|--|---------|--|
|  | RPS3A   |  |
|  | RPS4X   |  |
|  | RPS6    |  |
|  | RPS7    |  |
|  | RPS8    |  |
|  | RPSA    |  |
|  | RRAS    |  |
|  | RSU1    |  |
|  | RTN4    |  |
|  | RUVBL1  |  |
|  | RUVBL2  |  |
|  | S100A10 |  |
|  | S100A11 |  |
|  | S100A12 |  |
|  | S100A4  |  |
|  | S100A6  |  |
|  | S100A8  |  |
|  | S100A9  |  |
|  | S100B   |  |
|  | S100P   |  |
|  | SAA1    |  |
|  | SAA2    |  |
|  | SAA4    |  |
|  | SACM1L  |  |
|  | SAMHD1  |  |
|  | SAR1A   |  |
|  | SCAMP2  |  |
|  | SCARB2  |  |
|  | SCCPDH  |  |
|  | SCGB1D2 |  |

|  |           |  |
|--|-----------|--|
|  | SCP2      |  |
|  | SDCBP     |  |
|  | SDPR      |  |
|  | SEC22B    |  |
|  | SEC31A    |  |
|  | SEC63     |  |
|  | SELENBP1  |  |
|  | SEMA7A    |  |
|  | SEPP1     |  |
|  | SERPINA1  |  |
|  | SERPINA10 |  |
|  | SERPINA3  |  |
|  | SERPINA4  |  |
|  | SERPINA5  |  |
|  | SERPINA6  |  |
|  | SERPINA7  |  |
|  | SERPINB1  |  |
|  | SERPINC1  |  |
|  | SERPIND1  |  |
|  | SERPINE1  |  |
|  | SERPINF1  |  |
|  | SERPINF2  |  |
|  | SERPING1  |  |
|  | SERPINH1  |  |
|  | SFPQ      |  |
|  | SFRP1     |  |
|  | SGTA      |  |
|  | SH3BGRL   |  |
|  | SH3BGRL2  |  |
|  | SH3BGRL3  |  |

|  |          |  |
|--|----------|--|
|  | SH3D19   |  |
|  | SH3GLB2  |  |
|  | SHMT1    |  |
|  | SIGLEC1  |  |
|  | SIGLEC5  |  |
|  | SIGLEC9  |  |
|  | SIRPB1   |  |
|  | SKP1     |  |
|  | SLC14A1  |  |
|  | SLC16A1  |  |
|  | SLC1A5   |  |
|  | SLC25A3  |  |
|  | SLC25A5  |  |
|  | SLC29A1  |  |
|  | SLC2A1   |  |
|  | SLC2A3   |  |
|  | SLC30A1  |  |
|  | SLC3A2   |  |
|  | SLC40A1  |  |
|  | SLC43A1  |  |
|  | SLC43A2  |  |
|  | SLC43A3  |  |
|  | SLC44A1  |  |
|  | SLC44A2  |  |
|  | SLC4A1   |  |
|  | SLC9A3R1 |  |
|  | SLK      |  |
|  | SLPI     |  |
|  | SMCHD1   |  |
|  | SMIM1    |  |

|  |          |  |
|--|----------|--|
|  | SNAP23   |  |
|  | SNCA     |  |
|  | SNRNP200 |  |
|  | SNRPD3   |  |
|  | SNX2     |  |
|  | SOD1     |  |
|  | SOD2     |  |
|  | SOD3     |  |
|  | SORL1    |  |
|  | SPCS2    |  |
|  | SPCS3    |  |
|  | SPN      |  |
|  | SPP2     |  |
|  | SPTA1    |  |
|  | SPTAN1   |  |
|  | SPTB     |  |
|  | SPTBN1   |  |
|  | SQRDL    |  |
|  | SRI      |  |
|  | SRSF1    |  |
|  | SRSF2    |  |
|  | SRSF3    |  |
|  | SRSF6    |  |
|  | SSR1     |  |
|  | SSR4     |  |
|  | ST13     |  |
|  | STAB1    |  |
|  | STAM     |  |
|  | STBD1    |  |
|  | STC2     |  |

|  |         |  |
|--|---------|--|
|  | STEAP3  |  |
|  | STEAP4  |  |
|  | STIM1   |  |
|  | STIP1   |  |
|  | STK10   |  |
|  | STK24   |  |
|  | STK4    |  |
|  | STOM    |  |
|  | STRADB  |  |
|  | STT3A   |  |
|  | STX11   |  |
|  | STX3    |  |
|  | STX4    |  |
|  | STX7    |  |
|  | STXBP2  |  |
|  | STXBP3  |  |
|  | SUB1    |  |
|  | SULT1A1 |  |
|  | SUN2    |  |
|  | SURF4   |  |
|  | SVEP1   |  |
|  | SVIP    |  |
|  | SYK     |  |
|  | TAGLN   |  |
|  | TAGLN2  |  |
|  | TALDO1  |  |
|  | TANGO2  |  |
|  | TAOK3   |  |
|  | TAP1    |  |
|  | TAPBP   |  |

|  |         |  |
|--|---------|--|
|  | TARDBP  |  |
|  | TBXAS1  |  |
|  | TCIRG1  |  |
|  | TCP1    |  |
|  | TECR    |  |
|  | TF      |  |
|  | TFRC    |  |
|  | TGFB1   |  |
|  | TGFBI   |  |
|  | TGM2    |  |
|  | THBS1   |  |
|  | THBS4   |  |
|  | THEM6   |  |
|  | THEMIS2 |  |
|  | THY1    |  |
|  | TIMP1   |  |
|  | TIMP2   |  |
|  | TKT     |  |
|  | TLN1    |  |
|  | TLN2    |  |
|  | TLR2    |  |
|  | TM9SF2  |  |
|  | TMED10  |  |
|  | TMED2   |  |
|  | TMED4   |  |
|  | TMED5   |  |
|  | TMED7   |  |
|  | TMED9   |  |
|  | TMEM109 |  |
|  | TMEM173 |  |



|  |           |  |
|--|-----------|--|
|  | TMEM222   |  |
|  | TMEM43    |  |
|  | TMEM63B   |  |
|  | TMOD1     |  |
|  | TMX1      |  |
|  | TMX4      |  |
|  | TNC       |  |
|  | TNFRSF10C |  |
|  | TNNC1     |  |
|  | TNNC2     |  |
|  | TNNI1     |  |
|  | TNNI2     |  |
|  | TNNT1     |  |
|  | TNS1      |  |
|  | TNXB      |  |
|  | TOLLIP    |  |
|  | TOM1      |  |
|  | TOP1      |  |
|  | TOR1AIP1  |  |
|  | TP53I11   |  |
|  | TPI1      |  |
|  | TPM1      |  |
|  | TPM2      |  |
|  | TPM3      |  |
|  | TPM4      |  |
|  | TPP1      |  |
|  | TPP2      |  |
|  | TPSAB1    |  |
|  | TREM1     |  |
|  | TRIM72    |  |

|  |         |  |
|--|---------|--|
|  | TSG101  |  |
|  | TSPAN14 |  |
|  | TSPAN2  |  |
|  | TSPO    |  |
|  | TSTA3   |  |
|  | TTL12   |  |
|  | TTN     |  |
|  | TTR     |  |
|  | TUBA1A  |  |
|  | TUBA1B  |  |
|  | TUBA4A  |  |
|  | TUBB    |  |
|  | TUBB1   |  |
|  | TUBB2A  |  |
|  | TUBB4B  |  |
|  | TUBB6   |  |
|  | TUBB8   |  |
|  | TUFM    |  |
|  | TXN     |  |
|  | TXNDC5  |  |
|  | TXNIP   |  |
|  | TXNL1   |  |
|  | TXNRD1  |  |
|  | TYMP    |  |
|  | TYROBP  |  |
|  | UBA1    |  |
|  | UBA52   |  |
|  | UBAC1   |  |
|  | UBE2D2  |  |
|  | UBE2L3  |  |

|  |         |  |
|--|---------|--|
|  | UBE2N   |  |
|  | UBE2O   |  |
|  | UBE2V1  |  |
|  | UBR4    |  |
|  | UCHL3   |  |
|  | UFM1    |  |
|  | UGDH    |  |
|  | UGGT1   |  |
|  | UGP2    |  |
|  | UNC13D  |  |
|  | UQCRC1  |  |
|  | UQCRC2  |  |
|  | UQCRFS1 |  |
|  | UROD    |  |
|  | USP14   |  |
|  | USP15   |  |
|  | USP5    |  |
|  | USP9X   |  |
|  | VAC14   |  |
|  | VAMP3   |  |
|  | VAMP7   |  |
|  | VAMP8   |  |
|  | VAPA    |  |
|  | VASP    |  |
|  | VAT1    |  |
|  | VAV1    |  |
|  | VCAN    |  |
|  | VCL     |  |
|  | VCP     |  |
|  | VDAC1   |  |

|  |        |  |
|--|--------|--|
|  | VDAC2  |  |
|  | VIM    |  |
|  | VMP1   |  |
|  | VNN1   |  |
|  | VNN2   |  |
|  | VPS13A |  |
|  | VPS28  |  |
|  | VPS29  |  |
|  | VPS35  |  |
|  | VPS37C |  |
|  | VTA1   |  |
|  | VTN    |  |
|  | VWF    |  |
|  | WARS   |  |
|  | WASF2  |  |
|  | WBP2   |  |
|  | WDR1   |  |
|  | WDR77  |  |
|  | WDR81  |  |
|  | WDR91  |  |
|  | WIPI2  |  |
|  | WISP2  |  |
|  | XK     |  |
|  | XPO1   |  |
|  | XPO7   |  |
|  | XRCC5  |  |
|  | XRCC6  |  |
|  | YBX1   |  |
|  | YOD1   |  |
|  | YWHAB  |  |

|  |       |  |
|--|-------|--|
|  | YWHAE |  |
|  | YWHAG |  |
|  | YWHAH |  |
|  | YWHAQ |  |
|  | YWHAZ |  |
|  | ZYX   |  |
