# Supplementary material for: Use of extracellular vesicles from lymphatic drainage as surrogate markers of melanoma progression and BRAFV600E mutation
Source: PubMed Central journal article supplement — J Exp Med. 2019 Apr 11;216(5):1061–70. doi: 10.1084/jem.20181522 (PMC6504207; doi:10.1084/jem.20181522), 2019-04-11
Supplement: JEM_20181522_TableS4.pdf [file JEM_20181522_TableS4.pdf]

**Table S4. Proteins identified in melanoma cell lines-derived exosomes**

| Entry  | Entry name  | Gene name | Protein names                                                                     |
|--------|-------------|-----------|-----------------------------------------------------------------------------------|
| P31946 | 1433B_HUMAN | YWHAB     | 14-3-3 protein beta/alpha                                                         |
| P62258 | 1433E_HUMAN | YWHAE     | 14-3-3 protein epsilon                                                            |
| Q04917 | 1433F_HUMAN | YWHAH     | 14-3-3 protein eta                                                                |
| P61981 | 1433G_HUMAN | YWHAG     | 14-3-3 protein gamma                                                              |
| P27348 | 1433T_HUMAN | YWHAQ     | 14-3-3 protein theta                                                              |
| P63104 | 1433Z_HUMAN | YWHAZ     | 14-3-3 protein zeta/delta                                                         |
| P13746 | 1A11_HUMAN  | HLA-A     | HLA class I histocompatibility antigen                                            |
| P16190 | 1A33_HUMAN  | HLA-A     | HLA class I histocompatibility antigen                                            |
| P30453 | 1A34_HUMAN  | HLA-A     | HLA class I histocompatibility antigen                                            |
| P30462 | 1B14_HUMAN  | HLA-B     | HLA class I histocompatibility antigen                                            |
| P10321 | 1C07_HUMAN  | HLA-C     | HLA class I histocompatibility antigen                                            |
| Q14738 | 2A5D_HUMAN  | PPP2R5D   | Serine/threonine-protein phosphatase 2A 56 kDa regulatory subunit delta isoform   |
| P30153 | 2AAA_HUMAN  | PPP2R1A   | Serine/threonine-protein phosphatase 2A 65 kDa regulatory subunit A alpha isoform |
| P63151 | 2ABA_HUMAN  | PPP2R2A   | Serine/threonine-protein phosphatase 2A 55 kDa regulatory subunit B alpha isoform |
| P01912 | 2B13_HUMAN  | HLA-DRB1  | HLA class II histocompatibility antigen                                           |
| P08195 | 4F2_HUMAN   | SLC3A2    | 4F2 cell-surface antigen heavy chain                                              |
| P21589 | 5NTD_HUMAN  | NT5E      | 5'-nucleotidase                                                                   |
| P52209 | 6PGD_HUMAN  | PGD       | 6-phosphogluconate dehydrogenase                                                  |
| O95336 | 6PGL_HUMAN  | PGLS      | 6-phosphogluconolactonase                                                         |
| Q8IZ83 | A16A1_HUMAN | ALDH16A1  | Aldehyde dehydrogenase family 16 member A1                                        |
| P08697 | A2AP_HUMAN  | SERPINF2  | Alpha-2-antiplasmin                                                               |
| P01023 | A2MG_HUMAN  | A2M       | Alpha-2-macroglobulin                                                             |
| Q15758 | AAAT_HUMAN  | SLC1A5    | Neutral amino acid transporter B                                                  |
| P17174 | AATC_HUMAN  | GOT1      | Aspartate aminotransferase                                                        |
| P61221 | ABCE1_HUMAN | ABCE1     | ATP-binding cassette sub-family E member 1                                        |
| Q8NE71 | ABCF1_HUMAN | ABCF1     | ATP-binding cassette sub-family F member 1                                        |
| Q8IZP0 | ABI1_HUMAN  | ABI1      | Abl interactor 1                                                                  |
| P53396 | ACLY_HUMAN  | ACLY      | ATP-citrate synthase                                                              |
| P21399 | ACOC_HUMAN  | ACO1      | Cytoplasmic aconitate hydratase                                                   |
| O95573 | ACSL3_HUMAN | ACSL3     | Long-chain-fatty-acid--CoA ligase 3                                               |
| O60488 | ACSL4_HUMAN | ACSL4     | Long-chain-fatty-acid--CoA ligase 4                                               |
| P62736 | ACTA_HUMAN  | ACTA2     | Actin                                                                             |
| P63261 | ACTG_HUMAN  | ACTG1     | Actin                                                                             |

|        |             |          |                                                                |
|--------|-------------|----------|----------------------------------------------------------------|
| P12814 | ACTN1_HUMAN | ACTN1    | Alpha-actinin-1                                                |
| O43707 | ACTN4_HUMAN | ACTN4    | Alpha-actinin-4                                                |
| P61163 | ACTZ_HUMAN  | ACTR1A   | Alpha-centractin                                               |
| O14672 | ADA10_HUMAN | ADAM10   | Disintegrin and metalloproteinase domain-containing protein 10 |
| P78536 | ADA17_HUMAN | ADAM17   | Disintegrin and metalloproteinase domain-containing protein 17 |
| Q13443 | ADAM9_HUMAN | ADAM9    | Disintegrin and metalloproteinase domain-containing protein 9  |
| P35611 | ADDA_HUMAN  | ADD1     | Alpha-adducin                                                  |
| P11766 | ADHX_HUMAN  | ADH5     | Alcohol dehydrogenase class-3                                  |
| P55263 | ADK_HUMAN   | ADK      | Adenosine kinase                                               |
| P12236 | ADT3_HUMAN  | SLC25A6  | ADP/ATP translocase 3                                          |
| Q9Y653 | AGRG1_HUMAN | ADGRG1   | Adhesion G-protein coupled receptor G1                         |
| Q86SQ4 | AGRG6_HUMAN | ADGRG6   | Adhesion G-protein coupled receptor G6                         |
| O00468 | AGRIN_HUMAN | AGRN     | Agrin                                                          |
| Q09666 | AHNK_HUMAN  | AHNAK    | Neuroblast differentiation-associated protein AHNAK            |
| Q96BJ3 | AIDA_HUMAN  | AIDA     | Axin interactor                                                |
| P14550 | AK1A1_HUMAN | AKR1A1   | Alcohol dehydrogenase [NADP                                    |
| Q02952 | AKA12_HUMAN | AKAP12   | A-kinase anchor protein 12                                     |
| P00352 | AL1A1_HUMAN | ALDH1A1  | Retinal dehydrogenase 1                                        |
| P47895 | AL1A3_HUMAN | ALDH1A3  | Aldehyde dehydrogenase family 1 member A3                      |
| P49189 | AL9A1_HUMAN | ALDH9A1  | 4-trimethylaminobutyraldehyde dehydrogenase                    |
| P02768 | ALBU_HUMAN  | ALB      | Serum albumin                                                  |
| P04075 | ALDOA_HUMAN | ALDOA    | Fructose-bisphosphate aldolase A                               |
| P09972 | ALDOC_HUMAN | ALDOC    | Fructose-bisphosphate aldolase C                               |
| P15121 | ALDR_HUMAN  | AKR1B1   | Aldose reductase                                               |
| Q9H4A4 | AMPB_HUMAN  | RNPEP    | Aminopeptidase B                                               |
| P28838 | AMPL_HUMAN  | LAP3     | Cytosol aminopeptidase                                         |
| P15144 | AMPN_HUMAN  | ANPEP    | Aminopeptidase N                                               |
| Q9UKU9 | ANGL2_HUMAN | ANGPTL2  | Angiopoietin-related protein 2                                 |
| Q9NQW6 | ANLN_HUMAN  | ANLN     | Anillin                                                        |
| Q99873 | ANM1_HUMAN  | PRMT1    | Protein arginine N-methyltransferase 1                         |
| Q4KMQ2 | ANO6_HUMAN  | ANO6     | Anoctamin-6                                                    |
| P01008 | ANT3_HUMAN  | SERPINC1 | Antithrombin-III                                               |
| Q9H6X2 | ANTR1_HUMAN | ANTXR1   | Anthrax toxin receptor 1                                       |
| P50995 | ANX11_HUMAN | ANXA11   | Annexin A11                                                    |
| P04083 | ANXA1_HUMAN | ANXA1    | Annexin A1                                                     |
| P07355 | ANXA2_HUMAN | ANXA2    | Annexin A2                                                     |

|        |             |         |                                                      |
|--------|-------------|---------|------------------------------------------------------|
| P09525 | ANXA4_HUMAN | ANXA4   | Annexin A4                                           |
| P08758 | ANXA5_HUMAN | ANXA5   | Annexin A5                                           |
| P08133 | ANXA6_HUMAN | ANXA6   | Annexin A6                                           |
| P20073 | ANXA7_HUMAN | ANXA7   | Annexin A7                                           |
| Q10567 | AP1B1_HUMAN | AP1B1   | AP-1 complex subunit beta-1                          |
| Q9BXS5 | AP1M1_HUMAN | AP1M1   | AP-1 complex subunit mu-1                            |
| O95782 | AP2A1_HUMAN | AP2A1   | AP-2 complex subunit alpha-1                         |
| O94973 | AP2A2_HUMAN | AP2A2   | AP-2 complex subunit alpha-2                         |
| P63010 | AP2B1_HUMAN | AP2B1   | AP-2 complex subunit beta                            |
| Q96CW1 | AP2M1_HUMAN | AP2M1   | AP-2 complex subunit mu                              |
| P04114 | APOB_HUMAN  | APOB    | Apolipoprotein B-100                                 |
| P02649 | APOE_HUMAN  | APOE    | Apolipoprotein E                                     |
| P02749 | APOH_HUMAN  | APOH    | Beta-2-glycoprotein 1                                |
| Q92747 | ARC1A_HUMAN | ARPC1A  | Actin-related protein 2/3 complex subunit 1A         |
| O15143 | ARC1B_HUMAN | ARPC1B  | Actin-related protein 2/3 complex subunit 1B         |
| P84077 | ARF1_HUMAN  | ARF1    | ADP-ribosylation factor 1                            |
| P61204 | ARF3_HUMAN  | ARF3    | ADP-ribosylation factor 3                            |
| P18085 | ARF4_HUMAN  | ARF4    | ADP-ribosylation factor 4                            |
| P62330 | ARF6_HUMAN  | ARF6    | ADP-ribosylation factor 6                            |
| Q9NVJ2 | ARL8B_HUMAN | ARL8B   | ADP-ribosylation factor-like protein 8B              |
| P61160 | ARP2_HUMAN  | ACTR2   | Actin-related protein 2                              |
| P61158 | ARP3_HUMAN  | ACTR3   | Actin-related protein 3                              |
| O15144 | ARPC2_HUMAN | ARPC2   | Actin-related protein 2/3 complex subunit 2          |
| O15145 | ARPC3_HUMAN | ARPC3   | Actin-related protein 2/3 complex subunit 3          |
| P59998 | ARPC4_HUMAN | ARPC4   | Actin-related protein 2/3 complex subunit 4          |
| O43681 | ASNA_HUMAN  | ASNA1   | ATPase ASNA1                                         |
| P08243 | ASNS_HUMAN  | ASNS    | Asparagine synthetase [glutamine-hydrolyzing]        |
| P00966 | ASSY_HUMAN  | ASS1    | Argininosuccinate synthase                           |
| P05023 | AT1A1_HUMAN | ATP1A1  | Sodium/potassium-transporting ATPase subunit alpha-1 |
| P05026 | AT1B1_HUMAN | ATP1B1  | Sodium/potassium-transporting ATPase subunit beta-1  |
| P54709 | AT1B3_HUMAN | ATP1B3  | Sodium/potassium-transporting ATPase subunit beta-3  |
| P20020 | AT2B1_HUMAN | ATP2B1  | Plasma membrane calcium-transporting ATPase 1        |
| P23634 | AT2B4_HUMAN | ATP2B4  | Plasma membrane calcium-transporting ATPase 4        |
| P25705 | ATPA_HUMAN  | ATP5F1A | ATP synthase subunit alpha                           |
| P06576 | ATPB_HUMAN  | ATP5F1B | ATP synthase subunit beta                            |
| O75882 | ATRN_HUMAN  | ATRN    | Attractin                                            |

|        |             |          |                                                                             |
|--------|-------------|----------|-----------------------------------------------------------------------------|
| Q8WWM7 | ATX2L_HUMAN | ATXN2L   | Ataxin-2-like protein                                                       |
| P61769 | B2MG_HUMAN  | B2M      | Beta-2-microglobulin                                                        |
| P04920 | B3A2_HUMAN  | SLC4A2   | Anion exchange protein 2                                                    |
| O00154 | BACH_HUMAN  | ACOT7    | Cytosolic acyl coenzyme A thioester hydrolase                               |
| O75531 | BAF_HUMAN   | BANF1    | Barrier-to-autointegration factor                                           |
| O95816 | BAG2_HUMAN  | BAG2     | BAG family molecular chaperone regulator 2                                  |
| Q9UL15 | BAG5_HUMAN  | BAG5     | BAG family molecular chaperone regulator 5                                  |
| Q9UQB8 | BAIP2_HUMAN | BAIAP2   | Brain-specific angiogenesis inhibitor 1-associated protein 2                |
| P35613 | BASI_HUMAN  | BSG      | Basigin                                                                     |
| P80723 | BASP1_HUMAN | BASP1    | Brain acid soluble protein 1                                                |
| Q15582 | BGH3_HUMAN  | TGFBI    | Transforming growth factor-beta-induced protein ig-h3                       |
| Q9UHR4 | BI2L1_HUMAN | BAIAP2L1 | Brain-specific angiogenesis inhibitor 1-associated protein 2-like protein 1 |
| P53004 | BIEA_HUMAN  | BLVRA    | Biliverdin reductase A                                                      |
| P11021 | BIP_HUMAN   | HSPA5    | Endoplasmic reticulum chaperone BiP                                         |
| O95861 | BPNT1_HUMAN | BPNT1    | 3'                                                                          |
| Q5VW32 | BROX_HUMAN  | BROX     | BRO1 domain-containing protein BROX                                         |
| Q7KYR7 | BT2A1_HUMAN | BTN2A1   | Butyrophilin subfamily 2 member A1                                          |
| P11586 | C1TC_HUMAN  | MTHFD1   | C-1-tetrahydrofolate synthase                                               |
| Q5T0F9 | C2D1B_HUMAN | CC2D1B   | Coiled-coil and C2 domain-containing protein 1B                             |
| P54289 | CA2D1_HUMAN | CACNA2D1 | Voltage-dependent calcium channel subunit alpha-2/delta-1                   |
| Q9Y376 | CAB39_HUMAN | CAB39    | Calcium-binding protein 39                                                  |
| P55290 | CAD13_HUMAN | CDH13    | Cadherin-13                                                                 |
| P19022 | CADH2_HUMAN | CDH2     | Cadherin-2                                                                  |
| Q9BY67 | CADM1_HUMAN | CADM1    | Cell adhesion molecule 1                                                    |
| P0DP23 | CALM1_HUMAN | CALM1    | Calmodulin-1                                                                |
| P27797 | CALR_HUMAN  | CALR     | Calreticulin                                                                |
| O43852 | CALU_HUMAN  | CALU     | Calumenin                                                                   |
| P27824 | CALX_HUMAN  | CANX     | Calnexin                                                                    |
| P07384 | CAN1_HUMAN  | CAPN1    | Calpain-1 catalytic subunit                                                 |
| P17655 | CAN2_HUMAN  | CAPN2    | Calpain-2 catalytic subunit                                                 |
| O15484 | CAN5_HUMAN  | CAPN5    | Calpain-5                                                                   |
| Q86VP6 | CAND1_HUMAN | CAND1    | Cullin-associated NEDD8-dissociated protein 1                               |
| Q01518 | CAP1_HUMAN  | CAP1     | Adenylyl cyclase-associated protein 1                                       |
| P40121 | CAPG_HUMAN  | CAPG     | Macrophage-capping protein                                                  |
| P47756 | CAPZB_HUMAN | CAPZB    | F-actin-capping protein subunit beta                                        |
| P07339 | CATD_HUMAN  | CTSD     | Cathepsin D                                                                 |

|        |             |         |                                                           |
|--------|-------------|---------|-----------------------------------------------------------|
| P52907 | CAZA1_HUMAN | CAPZA1  | F-actin-capping protein subunit alpha-1                   |
| P47755 | CAZA2_HUMAN | CAPZA2  | F-actin-capping protein subunit alpha-2                   |
| Q96IY4 | CBPB2_HUMAN | CPB2    | Carboxypeptidase B2                                       |
| P14384 | CBPM_HUMAN  | CPM     | Carboxypeptidase M                                        |
| P16152 | CBR1_HUMAN  | CBR1    | Carbonyl reductase [NADPH] 1                              |
| Q9NV96 | CC50A_HUMAN | TMEM30A | Cell cycle control protein 50A                            |
| Q8IVM0 | CCD50_HUMAN | CCDC50  | Coiled-coil domain-containing protein 50                  |
| A2RUB6 | CCD66_HUMAN | CCDC66  | Coiled-coil domain-containing protein 66                  |
| Q6YHK3 | CD109_HUMAN | CD109   | CD109 antigen                                             |
| P48509 | CD151_HUMAN | CD151   | CD151 antigen                                             |
| Q13740 | CD166_HUMAN | ALCAM   | CD166 antigen                                             |
| Q5ZPR3 | CD276_HUMAN | CD276   | CD276 antigen                                             |
| Q9Y5K6 | CD2AP_HUMAN | CD2AP   | CD2-associated protein                                    |
| P16671 | CD36_HUMAN  | CD36    | Platelet glycoprotein 4                                   |
| P16070 | CD44_HUMAN  | CD44    | CD44 antigen                                              |
| Q08722 | CD47_HUMAN  | CD47    | Leukocyte surface antigen CD47                            |
| P13987 | CD59_HUMAN  | CD59    | CD59 glycoprotein                                         |
| P08962 | CD63_HUMAN  | CD63    | CD63 antigen                                              |
| P60033 | CD81_HUMAN  | CD81    | CD81 antigen                                              |
| P27701 | CD82_HUMAN  | CD82    | CD82 antigen                                              |
| P21926 | CD9_HUMAN   | CD9     | CD9 antigen                                               |
| P48960 | CD97_HUMAN  | CD97    | CD97 antigen                                              |
| P14209 | CD99_HUMAN  | CD99    | CD99 antigen                                              |
| Q16543 | CDC37_HUMAN | CDC37   | Hsp90 co-chaperone Cdc37                                  |
| P60953 | CDC42_HUMAN | CDC42   | Cell division control protein 42 homolog                  |
| P06493 | CDK1_HUMAN  | CDK1    | Cyclin-dependent kinase 1                                 |
| P13688 | CEAM1_HUMAN | CEACAM1 | Carcinoembryonic antigen-related cell adhesion molecule 1 |
| Q53EZ4 | CEP55_HUMAN | CEP55   | Centrosomal protein of 55 kDa                             |
| P00751 | CFAB_HUMAN  | CFB     | Complement factor B                                       |
| P10809 | CH60_HUMAN  | HSPD1   | 60 kDa heat shock protein                                 |
| Q9UNE7 | CHIP_HUMAN  | STUB1   | E3 ubiquitin-protein ligase CHIP                          |
| Q9HD42 | CHM1A_HUMAN | CHMP1A  | Charged multivesicular body protein 1a                    |
| Q7LBR1 | CHM1B_HUMAN | CHMP1B  | Charged multivesicular body protein 1b                    |
| O43633 | CHM2A_HUMAN | CHMP2A  | Charged multivesicular body protein 2a                    |
| Q9UQN3 | CHM2B_HUMAN | CHMP2B  | Charged multivesicular body protein 2b                    |
| Q9BY43 | CHM4A_HUMAN | CHMP4A  | Charged multivesicular body protein 4a                    |

|        |             |         |                                                           |
|--------|-------------|---------|-----------------------------------------------------------|
| Q9H444 | CHM4B_HUMAN | CHMP4B  | Charged multivesicular body protein 4b                    |
| Q9Y3E7 | CHMP3_HUMAN | CHMP3   | Charged multivesicular body protein 3                     |
| Q9NZZ3 | CHMP5_HUMAN | CHMP5   | Charged multivesicular body protein 5                     |
| Q15642 | CIP4_HUMAN  | TRIP10  | Cdc42-interacting protein 4                               |
| P09496 | CLCA_HUMAN  | CLTA    | Clathrin light chain A                                    |
| Q9NY35 | CLDN1_HUMAN | CLDND1  | Claudin domain-containing protein 1                       |
| Q00610 | CLH1_HUMAN  | CLTC    | Clathrin heavy chain 1                                    |
| O00299 | CLIC1_HUMAN | CLIC1   | Chloride intracellular channel protein 1                  |
| Q9Y696 | CLIC4_HUMAN | CLIC4   | Chloride intracellular channel protein 4                  |
| P09543 | CN37_HUMAN  | CNP     | 2'-3'-Cyclic nucleotide 3' phosphodiesterase              |
| Q96KP4 | CNDP2_HUMAN | CNDP2   | Cytosolic non-specific dipeptidase                        |
| Q96F85 | CNRP1_HUMAN | CNRIP1  | CB1 cannabinoid receptor-interacting protein 1            |
| P08572 | CO4A2_HUMAN | COL4A2  | Collagen alpha-2                                          |
| P01031 | CO5_HUMAN   | C5      | Complement C5                                             |
| P12109 | CO6A1_HUMAN | COL6A1  | Collagen alpha-1                                          |
| P12110 | CO6A2_HUMAN | COL6A2  | Collagen alpha-2                                          |
| P12111 | CO6A3_HUMAN | COL6A3  | Collagen alpha-3                                          |
| P02748 | CO9_HUMAN   | C9      | Complement component C9                                   |
| Q99715 | COCA1_HUMAN | COL12A1 | Collagen alpha-1                                          |
| P23528 | COF1_HUMAN  | CFL1    | Cofilin-1                                                 |
| Q9Y281 | COF2_HUMAN  | CFL2    | Cofilin-2                                                 |
| P39060 | COIA1_HUMAN | COL18A1 | Collagen alpha-1                                          |
| P21964 | COMT_HUMAN  | COMT    | Catechol O-methyltransferase                              |
| P53621 | COPA_HUMAN  | COPA    | Coatmer subunit alpha                                     |
| P53618 | COPB_HUMAN  | COPB1   | Coatmer subunit beta                                      |
| P35606 | COPB2_HUMAN | COPB2   | Coatmer subunit beta'                                     |
| P48444 | COPD_HUMAN  | ARCN1   | Coatmer subunit delta                                     |
| Q9Y678 | COPG1_HUMAN | COPG1   | Coatmer subunit gamma-1                                   |
| Q9BR76 | COR1B_HUMAN | CORO1B  | Coronin-1B                                                |
| Q9ULV4 | COR1C_HUMAN | CORO1C  | Coronin-1C                                                |
| Q14019 | COTL1_HUMAN | COTL1   | Coactosin-like protein                                    |
| Q99829 | CPNE1_HUMAN | CPNE1   | Copine-1                                                  |
| O75131 | CPNE3_HUMAN | CPNE3   | Copine-3                                                  |
| Q86YQ8 | CPNE8_HUMAN | CPNE8   | Copine-8                                                  |
| P04632 | CPNS1_HUMAN | CAPNS1  | Calpain small subunit 1                                   |
| Q16630 | CPSF6_HUMAN | CPSF6   | Cleavage and polyadenylation specificity factor subunit 6 |

|        |             |         |                                                                         |
|--------|-------------|---------|-------------------------------------------------------------------------|
| Q96D31 | CRCM1_HUMAN | ORA1    | Calcium release-activated calcium channel protein 1                     |
| P52943 | CRIP2_HUMAN | CRIP2   | Cysteine-rich protein 2                                                 |
| P15509 | CSF2R_HUMAN | CSF2RA  | Granulocyte-macrophage colony-stimulating factor receptor subunit alpha |
| Q8NEV1 | CSK23_HUMAN | CSNK2A3 | Casein kinase II subunit alpha 3                                        |
| O14936 | CSKP_HUMAN  | CASK    | Peripheral plasma membrane protein CASK                                 |
| Q9BT78 | CSN4_HUMAN  | COPS4   | COP9 signalosome complex subunit 4                                      |
| Q92905 | CSN5_HUMAN  | COPS5   | COP9 signalosome complex subunit 5                                      |
| P13611 | CSPG2_HUMAN | VCAN    | Versican core protein                                                   |
| Q6UVK1 | CSPG4_HUMAN | CSPG4   | Chondroitin sulfate proteoglycan 4                                      |
| P21291 | CSRP1_HUMAN | CSRP1   | Cysteine and glycine-rich protein 1                                     |
| Q96CG8 | CTHR1_HUMAN | CTHRC1  | Collagen triple helix repeat-containing protein 1                       |
| Q8WWI5 | CTL1_HUMAN  | SLC44A1 | Choline transporter-like protein 1                                      |
| P35221 | CTNA1_HUMAN | CTNNA1  | Catenin alpha-1                                                         |
| P35222 | CTNB1_HUMAN | CTNNB1  | Catenin beta-1                                                          |
| O60716 | CTND1_HUMAN | CTNND1  | Catenin delta-1                                                         |
| P30825 | CTR1_HUMAN  | SLC7A1  | High affinity cationic amino acid transporter 1                         |
| O14578 | CTRO_HUMAN  | CIT     | Citron Rho-interacting kinase                                           |
| Q13618 | CUL3_HUMAN  | CUL3    | Cullin-3                                                                |
| O60888 | CUTA_HUMAN  | CUTA    | Protein CutA                                                            |
| P17302 | CXA1_HUMAN  | GJA1    | Gap junction alpha-1 protein                                            |
| P78310 | CXAR_HUMAN  | CXADR   | Coxsackievirus and adenovirus receptor                                  |
| P36383 | CXG1_HUMAN  | GJC1    | Gap junction gamma-1 protein                                            |
| Q9HB71 | CYBP_HUMAN  | CACYBP  | Calcyclin-binding protein                                               |
| Q7L576 | CYFP1_HUMAN | CYFIP1  | Cytoplasmic FMR1-interacting protein 1                                  |
| P04080 | CYTB_HUMAN  | CSTB    | Cystatin-B                                                              |
| Q86T65 | DAAM2_HUMAN | DAAM2   | Disheveled-associated activator of morphogenesis 2                      |
| P08174 | DAF_HUMAN   | CD55    | Complement decay-accelerating factor                                    |
| Q14118 | DAG1_HUMAN  | DAG1    | Dystroglycan                                                            |
| Q13409 | DC1I2_HUMAN | DYNC1I2 | Cytoplasmic dynein 1 intermediate chain 2                               |
| Q96PD2 | DCBD2_HUMAN | DCBLD2  | Discoidin                                                               |
| Q16531 | DDB1_HUMAN  | DDB1    | DNA damage-binding protein 1                                            |
| Q92499 | DDX1_HUMAN  | DDX1    | ATP-dependent RNA helicase DDX1                                         |
| O00571 | DDX3X_HUMAN | DDX3X   | ATP-dependent RNA helicase DDX3X                                        |
| P60981 | DEST_HUMAN  | DSTN    | Destrin                                                                 |
| P09417 | DHPR_HUMAN  | QDPR    | Dihydropteridine reductase                                              |
| Q08211 | DHX9_HUMAN  | DHX9    | ATP-dependent RNA helicase A                                            |

|        |             |          |                                                                  |
|--------|-------------|----------|------------------------------------------------------------------|
| Q14689 | DIP2A_HUMAN | DIP2A    | Disco-interacting protein 2 homolog A                            |
| Q9P265 | DIP2B_HUMAN | DIP2B    | Disco-interacting protein 2 homolog B                            |
| Q9Y2E4 | DIP2C_HUMAN | DIP2C    | Disco-interacting protein 2 homolog C                            |
| O75165 | DJC13_HUMAN | DNAJC13  | DnaJ homolog subfamily C member 13                               |
| Q12959 | DLG1_HUMAN  | DLG1     | Disks large homolog 1                                            |
| Q9UGM3 | DMBT1_HUMAN | DMBT1    | Deleted in malignant brain tumors 1 protein                      |
| P31689 | DNJA1_HUMAN | DNAJA1   | DnaJ homolog subfamily A member 1                                |
| O60884 | DNJA2_HUMAN | DNAJA2   | DnaJ homolog subfamily A member 2                                |
| Q8WW22 | DNJA4_HUMAN | DNAJA4   | DnaJ homolog subfamily A member 4                                |
| P25685 | DNJB1_HUMAN | DNAJB1   | DnaJ homolog subfamily B member 1                                |
| Q9H3Z4 | DNJC5_HUMAN | DNAJC5   | DnaJ homolog subfamily C member 5                                |
| Q99615 | DNJC7_HUMAN | DNAJC7   | DnaJ homolog subfamily C member 7                                |
| O00429 | DNM1L_HUMAN | DNM1L    | Dynamin-1-like protein                                           |
| Q9ULA0 | DNPEP_HUMAN | DNPEP    | Aspartyl aminopeptidase                                          |
| Q96BY6 | DOC10_HUMAN | DOCK10   | Dedicator of cytokinesis protein 10                              |
| P20036 | DPA1_HUMAN  | HLA-DPA1 | HLA class II histocompatibility antigen                          |
| P04440 | DPB1_HUMAN  | HLA-DPB1 | HLA class II histocompatibility antigen                          |
| Q16555 | DPYL2_HUMAN | DPYSL2   | Dihydropyrimidinase-related protein 2                            |
| Q9BPU6 | DPYL5_HUMAN | DPYSL5   | Dihydropyrimidinase-related protein 5                            |
| P01903 | DRA_HUMAN   | HLA-DRA  | HLA class II histocompatibility antigen                          |
| P79483 | DRB3_HUMAN  | HLA-DRB3 | HLA class II histocompatibility antigen                          |
| Q16643 | DREB_HUMAN  | DBN1     | Drebrin                                                          |
| Q02413 | DSG1_HUMAN  | DSG1     | Desmoglein-1                                                     |
| Q14126 | DSG2_HUMAN  | DSG2     | Desmoglein-2                                                     |
| Q13838 | DX39B_HUMAN | DDX39B   | Spliceosome RNA helicase DDX39B                                  |
| Q14204 | DYHC1_HUMAN | DYNC1H1  | Cytoplasmic dynein 1 heavy chain 1                               |
| P63167 | DYL1_HUMAN  | DYNLL1   | Dynein light chain 1                                             |
| Q96FJ2 | DYL2_HUMAN  | DYNLL2   | Dynein light chain 2                                             |
| P50570 | DYN2_HUMAN  | DNM2     | Dynamin-2                                                        |
| O43491 | E41L2_HUMAN | EPB41L2  | Band 4.1-like protein 2                                          |
| Q9Y2J2 | E41L3_HUMAN | EPB41L3  | Band 4.1-like protein 3                                          |
| P42892 | ECE1_HUMAN  | ECE1     | Endothelin-converting enzyme 1                                   |
| Q16610 | ECM1_HUMAN  | ECM1     | Extracellular matrix protein 1                                   |
| O43854 | EDIL3_HUMAN | EDIL3    | EGF-like repeat and discoidin I-like domain-containing protein 3 |
| P24530 | EDNRB_HUMAN | EDNRB    | Endothelin receptor type B                                       |
| Q15075 | EEA1_HUMAN  | EEA1     | Early endosome antigen 1                                         |



|        |             |         |                                                                   |
|--------|-------------|---------|-------------------------------------------------------------------|
| P68104 | EF1A1_HUMAN | EEF1A1  | Elongation factor 1-alpha 1                                       |
| Q05639 | EF1A2_HUMAN | EEF1A2  | Elongation factor 1-alpha 2                                       |
| P24534 | EF1B_HUMAN  | EEF1B2  | Elongation factor 1-beta                                          |
| P29692 | EF1D_HUMAN  | EEF1D   | Elongation factor 1-delta                                         |
| P26641 | EF1G_HUMAN  | EEF1G   | Elongation factor 1-gamma                                         |
| P13639 | EF2_HUMAN   | EEF2    | Elongation factor 2                                               |
| P52799 | EFNB2_HUMAN | EFNB2   | Ephrin-B2                                                         |
| P17813 | EGLN_HUMAN  | ENG     | Endoglin                                                          |
| Q9H4M9 | EHD1_HUMAN  | EHD1    | EH domain-containing protein 1                                    |
| Q9NZN4 | EHD2_HUMAN  | EHD2    | EH domain-containing protein 2                                    |
| Q9NZN3 | EHD3_HUMAN  | EHD3    | EH domain-containing protein 3                                    |
| Q9H223 | EHD4_HUMAN  | EHD4    | EH domain-containing protein 4                                    |
| Q14152 | EIF3A_HUMAN | EIF3A   | Eukaryotic translation initiation factor 3 subunit A              |
| P55884 | EIF3B_HUMAN | EIF3B   | Eukaryotic translation initiation factor 3 subunit B              |
| Q99613 | EIF3C_HUMAN | EIF3C   | Eukaryotic translation initiation factor 3 subunit C              |
| O15371 | EIF3D_HUMAN | EIF3D   | Eukaryotic translation initiation factor 3 subunit D              |
| P60228 | EIF3E_HUMAN | EIF3E   | Eukaryotic translation initiation factor 3 subunit E              |
| O00303 | EIF3F_HUMAN | EIF3F   | Eukaryotic translation initiation factor 3 subunit F              |
| Q9Y262 | EIF3L_HUMAN | EIF3L   | Eukaryotic translation initiation factor 3 subunit L              |
| Q00013 | EM55_HUMAN  | MPP1    | 55 kDa erythrocyte membrane protein                               |
| O95834 | EMAL2_HUMAN | EML2    | Echinoderm microtubule-associated protein-like 2                  |
| Q9Y6C2 | EMIL1_HUMAN | EMILIN1 | EMILIN-1                                                          |
| Q9BXX0 | EMIL2_HUMAN | EMILIN2 | EMILIN-2                                                          |
| Q8N8S7 | ENAH_HUMAN  | ENAH    | Protein enabled homolog                                           |
| P06733 | ENOA_HUMAN  | ENO1    | Alpha-enolase                                                     |
| P09104 | ENOG_HUMAN  | ENO2    | Gamma-enolase                                                     |
| P14625 | ENPL_HUMAN  | HSP90B1 | Endoplasmin                                                       |
| P22413 | ENPP1_HUMAN | ENPP1   | Ectonucleotide pyrophosphatase/phosphodiesterase family member 1  |
| Q9UNN8 | EPCR_HUMAN  | PROCR   | Endothelial protein C receptor                                    |
| P29317 | EPHA2_HUMAN | EPHA2   | Ephrin type-A receptor 2                                          |
| P29320 | EPHA3_HUMAN | EPHA3   | Ephrin type-A receptor 3                                          |
| Q96RT1 | ERBIN_HUMAN | ERBIN   | Erbin                                                             |
| P15170 | ERF3A_HUMAN | GSPT1   | Eukaryotic peptide chain release factor GTP-binding subunit ERF3A |
| P10768 | ESTD_HUMAN  | ESD     | S-formylglutathione hydrolase                                     |
| Q9BSJ8 | ESYT1_HUMAN | ESYT1   | Extended synaptotagmin-1                                          |
| Q9H8M9 | EVA1A_HUMAN | EVA1A   | Protein eva-1 homolog A                                           |

|        |             |         |                                              |
|--------|-------------|---------|----------------------------------------------|
| Q9NVM1 | EVA1B_HUMAN | EVA1B   | Protein eva-1 homolog B                      |
| Q96A65 | EXOC4_HUMAN | EXOC4   | Exocyst complex component 4                  |
| Q16394 | EXT1_HUMAN  | EXT1    | Exostosin-1                                  |
| P15311 | EZRI_HUMAN  | EZR     | Ezrin                                        |
| P50502 | F10A1_HUMAN | ST13    | Hsc70-interacting protein                    |
| P00488 | F13A_HUMAN  | F13A1   | Coagulation factor XIII A chain              |
| Q9H0X4 | F234A_HUMAN | FAM234A | Protein FAM234A                              |
| Q9NUQ9 | FA49B_HUMAN | FAM49B  | Protein FAM49B                               |
| P12259 | FA5_HUMAN   | F5      | Coagulation factor V                         |
| Q01469 | FABP5_HUMAN | FABP5   | Fatty acid-binding protein                   |
| Q9Y4F1 | FARP1_HUMAN | FARP1   | FERM                                         |
| P49327 | FAS_HUMAN   | FASN    | Fatty acid synthase                          |
| Q14517 | FAT1_HUMAN  | FAT1    | Protocadherin Fat 1                          |
| Q96AC1 | FERM2_HUMAN | FERMT2  | Fermitin family homolog 2                    |
| P02771 | FETA_HUMAN  | AFP     | Alpha-fetoprotein                            |
| P02671 | FIBA_HUMAN  | FGA     | Fibrinogen alpha chain                       |
| P02679 | FIBG_HUMAN  | FGG     | Fibrinogen gamma chain                       |
| Q5D862 | FILA2_HUMAN | FLG2    | Filaggrin-2                                  |
| P02751 | FINC_HUMAN  | FN1     | Fibronectin                                  |
| P62942 | FKB1A_HUMAN | FKBP1A  | Peptidyl-prolyl cis-trans isomerase FKBP1A   |
| P21333 | FLNA_HUMAN  | FLNA    | Filamin-A                                    |
| O75369 | FLNB_HUMAN  | FLNB    | Filamin-B                                    |
| O75955 | FLOT1_HUMAN | FLOT1   | Flotillin-1                                  |
| Q14254 | FLOT2_HUMAN | FLOT2   | Flotillin-2                                  |
| Q96PY5 | FMNL2_HUMAN | FMNL2   | Formin-like protein 2                        |
| Q9P2B2 | FPRP_HUMAN  | PTGFRN  | Prostaglandin F2 receptor negative regulator |
| P02794 | FRIH_HUMAN  | FTH1    | Ferritin heavy chain                         |
| P07954 | FUMH_HUMAN  | FH      | Fumarate hydratase                           |
| O75084 | FZD7_HUMAN  | FZD7    | Frizzled-7                                   |
| P04406 | G3P_HUMAN   | GAPDH   | Glyceraldehyde-3-phosphate dehydrogenase     |
| P11413 | G6PD_HUMAN  | G6PD    | Glucose-6-phosphate 1-dehydrogenase          |
| P06744 | G6PI_HUMAN  | GPI     | Glucose-6-phosphate isomerase                |
| Q14376 | GALE_HUMAN  | GALE    | UDP-glucose 4-epimerase                      |
| P51570 | GALK1_HUMAN | GALK1   | Galactokinase                                |
| Q14697 | GANAB_HUMAN | GANAB   | Neutral alpha-glucosidase AB                 |
| P41250 | GARS_HUMAN  | GARS    | Glycine--tRNA ligase                         |

|        |             |         |                                                                  |
|--------|-------------|---------|------------------------------------------------------------------|
| P62873 | GBB1_HUMAN  | GNB1    | Guanine nucleotide-binding protein G                             |
| P62879 | GBB2_HUMAN  | GNB2    | Guanine nucleotide-binding protein G                             |
| Q9HAV0 | GBB4_HUMAN  | GNB4    | Guanine nucleotide-binding protein subunit beta-4                |
| Q9UBI6 | GBG12_HUMAN | GNG12   | Guanine nucleotide-binding protein G                             |
| Q99988 | GDF15_HUMAN | GDF15   | Growth/differentiation factor 15                                 |
| P31150 | GDIA_HUMAN  | GDI1    | Rab GDP dissociation inhibitor alpha                             |
| P50395 | GDIB_HUMAN  | GDI2    | Rab GDP dissociation inhibitor beta                              |
| P52565 | GDIR1_HUMAN | ARHGDIA | Rho GDP-dissociation inhibitor 1                                 |
| P06396 | GELS_HUMAN  | GSN     | Gelsolin                                                         |
| Q06210 | GFPT1_HUMAN | GFPT1   | Glutamine--fructose-6-phosphate aminotransferase [isomerizing] 1 |
| O14908 | GIPC1_HUMAN | GIPC1   | PDZ domain-containing protein GIPC1                              |
| P04921 | GLPC_HUMAN  | GYPC    | Glycophorin-C                                                    |
| O76003 | GLRX3_HUMAN | GLRX3   | Glutaredoxin-3                                                   |
| Q9Y5P6 | GMPPB_HUMAN | GMPPB   | Mannose-1-phosphate guanyltransferase beta                       |
| P36959 | GMPR1_HUMAN | GMPR    | GMP reductase 1                                                  |
| P29992 | GNA11_HUMAN | GNA11   | Guanine nucleotide-binding protein subunit alpha-11              |
| Q14344 | GNA13_HUMAN | GNA13   | Guanine nucleotide-binding protein subunit alpha-13              |
| P63096 | GNAI1_HUMAN | GNAI1   | Guanine nucleotide-binding protein G                             |
| P04899 | GNAI2_HUMAN | GNAI2   | Guanine nucleotide-binding protein G                             |
| P08754 | GNAI3_HUMAN | GNAI3   | Guanine nucleotide-binding protein G                             |
| P09471 | GNAO_HUMAN  | GNAO1   | Guanine nucleotide-binding protein G                             |
| P50148 | GNAQ_HUMAN  | GNAQ    | Guanine nucleotide-binding protein G                             |
| P63092 | GNAS2_HUMAN | GNAS    | Guanine nucleotide-binding protein G                             |
| Q7Z5G4 | GOGA7_HUMAN | GOLGA7  | Golgin subfamily A member 7                                      |
| P35052 | GPC1_HUMAN  | GPC1    | Glypican-1 [Cleaved into: Secreted glypican-1]                   |
| Q9NZH0 | GPC5B_HUMAN | GPRC5B  | G-protein coupled receptor family C group 5 member B             |
| Q13491 | GPM6B_HUMAN | GPM6B   | Neuronal membrane glycoprotein M6-b                              |
| Q14956 | GNPMB_HUMAN | GNPMB   | Transmembrane glycoprotein NMB                                   |
| P62993 | GRB2_HUMAN  | GRB2    | Growth factor receptor-bound protein 2                           |
| P38646 | GRP75_HUMAN | HSPA9   | Stress-70 protein                                                |
| Q92896 | GSLG1_HUMAN | GLG1    | Golgi apparatus protein 1                                        |
| P78417 | GSTO1_HUMAN | GSTO1   | Glutathione S-transferase omega-1                                |
| P09211 | GSTP1_HUMAN | GSTP1   | Glutathione S-transferase P                                      |
| P11166 | GTR1_HUMAN  | SLC2A1  | Solute carrier family 2                                          |
| P11169 | GTR3_HUMAN  | SLC2A3  | Solute carrier family 2                                          |
| P49915 | GUAA_HUMAN  | GMPS    | GMP synthase [glutamine-hydrolyzing]                             |

|        |             |           |                                                              |
|--------|-------------|-----------|--------------------------------------------------------------|
| P10412 | H14_HUMAN   | HIST1H1E  | Histone H1.4                                                 |
| P16401 | H15_HUMAN   | HIST1H1B  | Histone H1.5                                                 |
| Q99878 | H2A1J_HUMAN | HIST1H2AJ | Histone H2A type 1-J                                         |
| Q71UI9 | H2AV_HUMAN  | H2AFV     | Histone H2A.V                                                |
| O75367 | H2AY_HUMAN  | H2AFY     | Core histone macro-H2A.1                                     |
| Q16778 | H2B2E_HUMAN | HIST2H2BE | Histone H2B type 2-E                                         |
| Q71DI3 | H32_HUMAN   | HIST2H3A  | Histone H3.2                                                 |
| P62805 | H4_HUMAN    | HIST1H4A  | Histone H4                                                   |
| Q58FF8 | H90B2_HUMAN | HSP90AB2P | Putative heat shock protein HSP 90-beta 2                    |
| P02008 | HBAZ_HUMAN  | HBZ       | Hemoglobin subunit zeta                                      |
| P02042 | HBD_HUMAN   | HBD       | Hemoglobin subunit delta                                     |
| Q9NRV9 | HEBP1_HUMAN | HEBP1     | Heme-binding protein 1                                       |
| Q9ULI3 | HEG1_HUMAN  | HEG1      | Protein HEG homolog 1                                        |
| P07686 | HEXB_HUMAN  | HEXB      | Beta-hexosaminidase subunit beta                             |
| Q04756 | HGFA_HUMAN  | HGFAC     | Hepatocyte growth factor activator                           |
| O14964 | HGS_HUMAN   | HGS       | Hepatocyte growth factor-regulated tyrosine kinase substrate |
| Q96JB3 | HIC2_HUMAN  | HIC2      | Hypermethylated in cancer 2 protein                          |
| P49773 | HINT1_HUMAN | HINT1     | Histidine triad nucleotide-binding protein 1                 |
| P31943 | HNRH1_HUMAN | HNRNPH1   | Heterogeneous nuclear ribonucleoprotein H                    |
| Q14103 | HNRPD_HUMAN | HNRNPD    | Heterogeneous nuclear ribonucleoprotein D0                   |
| P61978 | HNRPK_HUMAN | HNRNPK    | Heterogeneous nuclear ribonucleoprotein K                    |
| P14866 | HNRPL_HUMAN | HNRNPL    | Heterogeneous nuclear ribonucleoprotein L                    |
| O60506 | HNRPQ_HUMAN | SYNCRIP   | Heterogeneous nuclear ribonucleoprotein Q                    |
| Q00839 | HNRPU_HUMAN | HNRNPU    | Heterogeneous nuclear ribonucleoprotein U                    |
| Q86YZ3 | HORN_HUMAN  | HRNR      | Hornerin                                                     |
| P37235 | HPCL1_HUMAN | HPCAL1    | Hippocalcin-like protein 1                                   |
| P00492 | HPRT_HUMAN  | HPRT1     | Hypoxanthine-guanine phosphoribosyltransferase               |
| P00738 | HPT_HUMAN   | HP        | Haptoglobin                                                  |
| Q92598 | HS105_HUMAN | HSPH1     | Heat shock protein 105 kDa                                   |
| P0DMV8 | HS71A_HUMAN | HSPA1A    | Heat shock 70 kDa protein 1A                                 |
| P07900 | HS90A_HUMAN | HSP90AA1  | Heat shock protein HSP 90-alpha                              |
| P08238 | HS90B_HUMAN | HSP90AB1  | Heat shock protein HSP 90-beta                               |
| P54652 | HSP72_HUMAN | HSPA2     | Heat shock-related 70 kDa protein 2                          |
| P34932 | HSP74_HUMAN | HSPA4     | Heat shock 70 kDa protein 4                                  |
| P17066 | HSP76_HUMAN | HSPA6     | Heat shock 70 kDa protein 6                                  |
| P11142 | HSP7C_HUMAN | HSPA8     | Heat shock cognate 71 kDa protein                            |

|        |             |         |                                                      |
|--------|-------------|---------|------------------------------------------------------|
| P04792 | HSPB1_HUMAN | HSPB1   | Heat shock protein beta-1                            |
| Q92743 | HTRA1_HUMAN | HTRA1   | Serine protease HTRA1                                |
| Q9BY13 | HYCCI_HUMAN | FAM126A | Hyccin                                               |
| P07099 | HYEP_HUMAN  | EPHX1   | Epoxide hydrolase 1                                  |
| Q9Y4L1 | HYOU1_HUMAN | HYOU1   | Hypoxia up-regulated protein 1                       |
| P05362 | ICAM1_HUMAN | ICAM1   | Intercellular adhesion molecule 1                    |
| O75874 | IDHC_HUMAN  | IDH1    | Isocitrate dehydrogenase [NADP] cytoplasmic          |
| P47813 | IF1AX_HUMAN | EIF1AX  | Eukaryotic translation initiation factor 1A          |
| Q9Y6M1 | IF2B2_HUMAN | IGF2BP2 | Insulin-like growth factor 2 mRNA-binding protein 2  |
| P41091 | IF2G_HUMAN  | EIF2S3  | Eukaryotic translation initiation factor 2 subunit 3 |
| P60842 | IF4A1_HUMAN | EIF4A1  | Eukaryotic initiation factor 4A-I                    |
| Q14240 | IF4A2_HUMAN | EIF4A2  | Eukaryotic initiation factor 4A-II                   |
| P38919 | IF4A3_HUMAN | EIF4A3  | Eukaryotic initiation factor 4A-III                  |
| P63241 | IF5A1_HUMAN | EIF5A   | Eukaryotic translation initiation factor 5A-1        |
| P56537 | IF6_HUMAN   | EIF6    | Eukaryotic translation initiation factor 6           |
| Q01628 | IFM3_HUMAN  | IFITM3  | Interferon-induced transmembrane protein 3           |
| P08069 | IGF1R_HUMAN | IGF1R   | Insulin-like growth factor 1 receptor                |
| P01591 | IGJ_HUMAN   | JCHAIN  | Immunoglobulin J chain                               |
| B9A064 | IGLL5_HUMAN | IGLL5   | Immunoglobulin lambda-like polypeptide 5             |
| O75054 | IGSF3_HUMAN | IGSF3   | Immunoglobulin superfamily member 3                  |
| Q969P0 | IGSF8_HUMAN | IGSF8   | Immunoglobulin superfamily member 8                  |
| Q9NPH3 | IL1AP_HUMAN | IL1RAP  | Interleukin-1 receptor accessory protein             |
| Q12905 | ILF2_HUMAN  | ILF2    | Interleukin enhancer-binding factor 2                |
| Q12906 | ILF3_HUMAN  | ILF3    | Interleukin enhancer-binding factor 3                |
| Q13418 | ILK_HUMAN   | ILK     | Integrin-linked protein kinase                       |
| P52292 | IMA1_HUMAN  | KPNA2   | Importin subunit alpha-1                             |
| O00629 | IMA3_HUMAN  | KPNA4   | Importin subunit alpha-3                             |
| Q14974 | IMB1_HUMAN  | KPNB1   | Importin subunit beta-1                              |
| P12268 | IMDH2_HUMAN | IMPDH2  | Inosine-5'-monophosphate dehydrogenase 2             |
| Q9NQS7 | INCE_HUMAN  | INCENP  | Inner centromere protein                             |
| O00410 | IPO5_HUMAN  | IPO5    | Importin-5                                           |
| O95373 | IPO7_HUMAN  | IPO7    | Importin-7                                           |
| Q15181 | IPYR_HUMAN  | PPA1    | Inorganic pyrophosphatase                            |
| P46940 | IQGA1_HUMAN | IQGAP1  | Ras GTPase-activating-like protein IQGAP1            |
| P53990 | IST1_HUMAN  | IST1    | IST1 homolog                                         |
| P56199 | ITA1_HUMAN  | ITGA1   | Integrin alpha-1                                     |

|        |             |         |                                                               |
|--------|-------------|---------|---------------------------------------------------------------|
| P17301 | ITA2_HUMAN  | ITGA2   | Integrin alpha-2                                              |
| P26006 | ITA3_HUMAN  | ITGA3   | Integrin alpha-3                                              |
| P13612 | ITA4_HUMAN  | ITGA4   | Integrin alpha-4                                              |
| P08648 | ITA5_HUMAN  | ITGA5   | Integrin alpha-5                                              |
| P23229 | ITA6_HUMAN  | ITGA6   | Integrin alpha-6                                              |
| P06756 | ITAV_HUMAN  | ITGAV   | Integrin alpha-V                                              |
| P05556 | ITB1_HUMAN  | ITGB1   | Integrin beta-1                                               |
| P05106 | ITB3_HUMAN  | ITGB3   | Integrin beta-3                                               |
| P18084 | ITB5_HUMAN  | ITGB5   | Integrin beta-5                                               |
| P26012 | ITB8_HUMAN  | ITGB8   | Integrin beta-8                                               |
| Q96J02 | ITCH_HUMAN  | ITCH    | E3 ubiquitin-protein ligase Itchy homolog                     |
| Q9NQX7 | ITM2C_HUMAN | ITM2C   | Integral membrane protein 2C                                  |
| Q9Y624 | JAM1_HUMAN  | F11R    | Junctional adhesion molecule A                                |
| Q9BX67 | JAM3_HUMAN  | JAM3    | Junctional adhesion molecule C                                |
| P13645 | K1C10_HUMAN | KRT10   | Keratin 10                                                    |
| P02533 | K1C14_HUMAN | KRT14   | Keratin 14                                                    |
| P08779 | K1C16_HUMAN | KRT16   | Keratin 16                                                    |
| P35527 | K1C9_HUMAN  | KRT9    | Keratin 9                                                     |
| P35908 | K22E_HUMAN  | KRT2    | Keratin 2                                                     |
| P04264 | K2C1_HUMAN  | KRT1    | Keratin 1                                                     |
| P13647 | K2C5_HUMAN  | KRT5    | Keratin 5                                                     |
| P02538 | K2C6A_HUMAN | KRT6A   | Keratin 6A                                                    |
| P00568 | KAD1_HUMAN  | AK1     | Adenylate kinase isoenzyme 1                                  |
| P10644 | KAP0_HUMAN  | PRKAR1A | cAMP-dependent protein kinase type I-alpha regulatory subunit |
| P48729 | KC1A_HUMAN  | CSNK1A1 | Casein kinase I isoform alpha                                 |
| P78368 | KC1G2_HUMAN | CSNK1G2 | Casein kinase I isoform gamma-2                               |
| P30085 | KCY_HUMAN   | CMPK1   | UMP-CMP kinase                                                |
| Q13237 | KGP2_HUMAN  | PRKG2   | cGMP-dependent protein kinase 2                               |
| Q02241 | KIF23_HUMAN | KIF23   | Kinesin-like protein KIF23                                    |
| P33176 | KINH_HUMAN  | KIF5B   | Kinesin-1 heavy chain                                         |
| Q96J84 | KIRR1_HUMAN | KIRREL1 | Kin of IRRE-like protein 1                                    |
| Q07866 | KLC1_HUMAN  | KLC1    | Kinesin light chain 1                                         |
| P14618 | KPYM_HUMAN  | PKM     | Pyruvate kinase PKM                                           |
| Q86UP2 | KTN1_HUMAN  | KTN1    | Kinectin                                                      |
| P32004 | L1CAM_HUMAN | L1CAM   | Neural cell adhesion molecule L1                              |
| Q16363 | LAMA4_HUMAN | LAMA4   | Laminin subunit alpha-4                                       |

|        |             |          |                                                                 |
|--------|-------------|----------|-----------------------------------------------------------------|
| P07942 | LAMB1_HUMAN | LAMB1    | Laminin subunit beta-1                                          |
| P11047 | LAMC1_HUMAN | LAMC1    | Laminin subunit gamma-1                                         |
| P11279 | LAMP1_HUMAN | LAMP1    | Lysosome-associated membrane glycoprotein 1                     |
| P13473 | LAMP2_HUMAN | LAMP2    | Lysosome-associated membrane glycoprotein 2                     |
| O43813 | LANC1_HUMAN | LANCL1   | LanC-like protein 1                                             |
| Q01650 | LAT1_HUMAN  | SLC7A5   | Large neutral amino acids transporter small subunit 1           |
| Q9UHI5 | LAT2_HUMAN  | SLC7A8   | Large neutral amino acids transporter small subunit 2           |
| P00338 | LDHA_HUMAN  | LDHA     | L-lactate dehydrogenase A chain                                 |
| P07195 | LDHB_HUMAN  | LDHB     | L-lactate dehydrogenase B chain                                 |
| P01130 | LDLR_HUMAN  | LDLR     | Low-density lipoprotein receptor                                |
| P09382 | LEG1_HUMAN  | LGALS1   | Galectin-1                                                      |
| P17931 | LEG3_HUMAN  | LGALS3   | Galectin-3                                                      |
| Q08380 | LG3BP_HUMAN | LGALS3BP | Galectin-3-binding protein                                      |
| Q04760 | LGUL_HUMAN  | GLO1     | Lactoylglutathione lyase                                        |
| Q6ZUX7 | LHPL2_HUMAN | LHFPL2   | LHFPL tetraspan subfamily member 2 protein                      |
| P48059 | LIMS1_HUMAN | LIMS1    | LIM and senescent cell antigen-like-containing domain protein 1 |
| Q9NUP9 | LIN7C_HUMAN | LIN7C    | Protein lin-7 homolog C                                         |
| Q86W92 | LIPB1_HUMAN | PPFIBP1  | Liprin-beta-1                                                   |
| P43034 | LIS1_HUMAN  | PAFAH1B1 | Platelet-activating factor acetylhydrolase IB subunit alpha     |
| P09960 | LKHA4_HUMAN | LTA4H    | Leukotriene A-4 hydrolase                                       |
| Q9NUN5 | LMBD1_HUMAN | LMBRD1   | Probable lysosomal cobalamin transporter                        |
| P02545 | LMNA_HUMAN  | LMNA     | Prelamin-A/C [Cleaved into: Lamin-A/C                           |
| Q9Y4K0 | LOXL2_HUMAN | LOXL2    | Lysyl oxidase homolog 2                                         |
| Q93052 | LPP_HUMAN   | LPP      | Lipoma-preferred partner                                        |
| Q96AG4 | LRC59_HUMAN | LRRC59   | Leucine-rich repeat-containing protein 59                       |
| Q07954 | LRP1_HUMAN  | LRP1     | Prolow-density lipoprotein receptor-related protein 1           |
| Q13449 | LSAMP_HUMAN | LSAMP    | Limbic system-associated membrane protein                       |
| Q86X29 | LSR_HUMAN   | LSR      | Lipolysis-stimulated lipoprotein receptor                       |
| Q6IAA8 | LTOR1_HUMAN | LAMTOR1  | Ragulator complex protein LAMTOR1                               |
| Q9UHA4 | LTOR3_HUMAN | LAMTOR3  | Ragulator complex protein LAMTOR3                               |
| Q16553 | LY6E_HUMAN  | LY6E     | Lymphocyte antigen 6E                                           |
| P07948 | LYN_HUMAN   | LYN      | Tyrosine-protein kinase Lyn                                     |
| O75608 | LYPA1_HUMAN | LYPLA1   | Acyl-protein thioesterase 1                                     |
| O95372 | LYPA2_HUMAN | LYPLA2   | Acyl-protein thioesterase 2                                     |
| O95819 | M4K4_HUMAN  | MAP4K4   | Mitogen-activated protein kinase kinase kinase kinase 4         |
| O43708 | MAAI_HUMAN  | GSTZ1    | Maleylacetoacetate isomerase                                    |

|        |             |          |                                                            |
|--------|-------------|----------|------------------------------------------------------------|
| Q9UNF1 | MAGD2_HUMAN | MAGED2   | Melanoma-associated antigen D2                             |
| Q16655 | MAR1_HUMAN  | MLANA    | Melanoma antigen recognized by T-cells 1                   |
| P29966 | MARCS_HUMAN | MARCKS   | Myristoylated alanine-rich C-kinase substrate              |
| Q15691 | MARE1_HUMAN | MAPRE1   | Microtubule-associated protein RP/EB family member 1       |
| Q96EY5 | MB12A_HUMAN | MVB12A   | Multivesicular body subunit 12A                            |
| Q9H7P6 | MB12B_HUMAN | MVB12B   | Multivesicular body subunit 12B                            |
| P15529 | MCP_HUMAN   | CD46     | Membrane cofactor protein                                  |
| P40925 | MDHC_HUMAN  | MDH1     | Malate dehydrogenase                                       |
| P40926 | MDHM_HUMAN  | MDH2     | Malate dehydrogenase                                       |
| P31153 | METK2_HUMAN | MAT2A    | S-adenosylmethionine synthase isoform type-2               |
| P55083 | MFAP4_HUMAN | MFAP4    | Microfibril-associated glycoprotein 4                      |
| Q08431 | MFGM_HUMAN  | MFGE8    | Lactadherin                                                |
| Q6NUT3 | MFS12_HUMAN | MFSD12   | Major facilitator superfamily domain-containing protein 12 |
| O60291 | MGRN1_HUMAN | MGRN1    | E3 ubiquitin-protein ligase MGRN1                          |
| Q8TDZ2 | MICA1_HUMAN | MICAL1   | [F-actin]-monooxygenase MICAL1                             |
| P14174 | MIF_HUMAN   | MIF      | Macrophage migration inhibitory factor                     |
| Q8N3F8 | MILK1_HUMAN | MICALL1  | MICAL-like protein 1                                       |
| Q8N4C8 | MINK1_HUMAN | MINK1    | Misshapen-like kinase 1                                    |
| Q8WV92 | MITD1_HUMAN | MITD1    | MIT domain-containing protein 1                            |
| P21741 | MK_HUMAN    | MDK      | Midkine                                                    |
| P28482 | MK01_HUMAN  | MAPK1    | Mitogen-activated protein kinase 1                         |
| P19105 | ML12A_HUMAN | MYL12A   | Myosin regulatory light chain 12A                          |
| P50281 | MMP14_HUMAN | MMP14    | Matrix metalloproteinase-14                                |
| Q9H8S9 | MOB1A_HUMAN | MOB1A    | MOB kinase activator 1A                                    |
| P26038 | MOES_HUMAN  | MSN      | Moesin                                                     |
| P53985 | MOT1_HUMAN  | SLC16A1  | Monocarboxylate transporter 1                              |
| O15427 | MOT4_HUMAN  | SLC16A3  | Monocarboxylate transporter 4                              |
| O15403 | MOT7_HUMAN  | SLC16A6  | Monocarboxylate transporter 7                              |
| Q9HCE1 | MOV10_HUMAN | MOV10    | Putative helicase MOV-10                                   |
| Q02750 | MP2K1_HUMAN | MAP2K1   | Dual specificity mitogen-activated protein kinase kinase 1 |
| Q9NZW5 | MPP6_HUMAN  | MPP6     | MAGUK p55 subfamily member 6                               |
| P20645 | MPRD_HUMAN  | M6PR     | Cation-dependent mannose-6-phosphate receptor              |
| P11717 | MPRI_HUMAN  | IGF2R    | Cation-independent mannose-6-phosphate receptor            |
| O95297 | MPZL1_HUMAN | MPZL1    | Myelin protein zero-like protein 1                         |
| P49006 | MRP_HUMAN   | MARCKSL1 | MARCKS-related protein                                     |
| P33527 | MRP1_HUMAN  | ABCC1    | Multidrug resistance-associated protein 1                  |



|        |             |          |                                                 |
|--------|-------------|----------|-------------------------------------------------|
| O15439 | MRP4_HUMAN  | ABCC4    | Multidrug resistance-associated protein 4       |
| P58546 | MTPN_HUMAN  | MTPN     | Myotrophin                                      |
| P43121 | MUC18_HUMAN | MCAM     | Cell surface glycoprotein MUC18                 |
| Q14764 | MVP_HUMAN   | MVP      | Major vault protein                             |
| P35580 | MYH10_HUMAN | MYH10    | Myosin-10                                       |
| P35579 | MYH9_HUMAN  | MYH9     | Myosin-9                                        |
| P60660 | MYL6_HUMAN  | MYL6     | Myosin light polypeptide 6                      |
| Q9HD67 | MYO10_HUMAN | MYO10    | Unconventional myosin-X                         |
| O43795 | MYO1B_HUMAN | MYO1B    | Unconventional myosin-Ib                        |
| O00159 | MYO1C_HUMAN | MYO1C    | Unconventional myosin-Ic                        |
| O94832 | MYO1D_HUMAN | MYO1D    | Unconventional myosin-I d                       |
| Q12965 | MYO1E_HUMAN | MYO1E    | Unconventional myosin-Ie                        |
| Q9Y411 | MYO5A_HUMAN | MYO5A    | Unconventional myosin-Va                        |
| Q9NZM1 | MYOF_HUMAN  | MYOF     | Myoferlin                                       |
| P60201 | MYPR_HUMAN  | PLP1     | Myelin proteolipid protein                      |
| P43490 | NAMPT_HUMAN | NAMPT    | Nicotinamide phosphoribosyltransferase          |
| P13591 | NCAM1_HUMAN | NCAM1    | Neural cell adhesion molecule 1                 |
| Q9Y2A7 | NCKP1_HUMAN | NCKAP1   | Nck-associated protein 1                        |
| P62166 | NCS1_HUMAN  | NCS1     | Neuronal calcium sensor 1                       |
| P15531 | NDKA_HUMAN  | NME1     | Nucleoside diphosphate kinase A                 |
| P22392 | NDKB_HUMAN  | NME2     | Nucleoside diphosphate kinase B                 |
| Q9UGV2 | NDRG3_HUMAN | NDRG3    | Protein NDRG3                                   |
| Q9NQS3 | NECT3_HUMAN | NECTIN3  | Nectin-3                                        |
| Q96PU5 | NED4L_HUMAN | NEDD4L   | E3 ubiquitin-protein ligase NEDD4-like          |
| P46934 | NEDD4_HUMAN | NEDD4    | E3 ubiquitin-protein ligase NEDD4               |
| P08473 | NEP_HUMAN   | MME      | Neprilysin                                      |
| P17677 | NEUM_HUMAN  | GAP43    | Neuromodulin                                    |
| Q8NBF2 | NHLC2_HUMAN | NHLRC2   | NHL repeat-containing protein 2                 |
| O14745 | NHRF1_HUMAN | SLC9A3R1 | Na(+)/H(+) exchange regulatory cofactor NHE-RF1 |
| Q15599 | NHRF2_HUMAN | SLC9A3R2 | Na(+)/H(+) exchange regulatory cofactor NHE-RF2 |
| Q96TA1 | NIBL1_HUMAN | FAM129B  | Niban-like protein 1                            |
| Q92542 | NICA_HUMAN  | NCSTN    | Nicastrin                                       |
| Q04721 | NOTC2_HUMAN | NOTCH2   | Neurogenic locus notch homolog protein 2        |
| P55209 | NP1L1_HUMAN | NAP1L1   | Nucleosome assembly protein 1-like 1            |
| Q99733 | NP1L4_HUMAN | NAP1L4   | Nucleosome assembly protein 1-like 4            |
| O15118 | NPC1_HUMAN  | NPC1     | NPC intracellular cholesterol transporter 1     |

|        |             |          |                                                                   |
|--------|-------------|----------|-------------------------------------------------------------------|
| P06748 | NPM_HUMAN   | NPM1     | Nucleophosmin                                                     |
| Q9Y639 | NPTN_HUMAN  | NPTN     | Neuroplastin                                                      |
| P15559 | NQO1_HUMAN  | NQO1     | NAD                                                               |
| O14786 | NRP1_HUMAN  | NRP1     | Neuropilin-1                                                      |
| O60462 | NRP2_HUMAN  | NRP2     | Neuropilin-2                                                      |
| P61970 | NTF2_HUMAN  | NUTF2    | Nuclear transport factor 2                                        |
| Q9P121 | NTRI_HUMAN  | NTM      | Neurotrimin                                                       |
| Q9Y266 | NUDC_HUMAN  | NUDC     | Nuclear migration protein nudC                                    |
| Q9NTK5 | OLA1_HUMAN  | OLA1     | Obg-like ATPase 1                                                 |
| Q92882 | OSTF1_HUMAN | OSTF1    | Osteoclast-stimulating factor 1                                   |
| Q6GQQ9 | OTU7B_HUMAN | OTUD7B   | OTU domain-containing protein 7B                                  |
| Q96FW1 | OTUB1_HUMAN | OTUB1    | Ubiquitin thioesterase OTUB1                                      |
| Q04671 | P_HUMAN     | OCA2     | P protein                                                         |
| Q99571 | P2RX4_HUMAN | P2RX4    | P2X purinoceptor 4                                                |
| Q99572 | P2RX7_HUMAN | P2RX7    | P2X purinoceptor 7                                                |
| Q9BTU6 | P4K2A_HUMAN | PI4K2A   | Phosphatidylinositol 4-kinase type 2-alpha                        |
| P68402 | PA1B2_HUMAN | PAFAH1B2 | Platelet-activating factor acetylhydrolase IB subunit beta        |
| Q15102 | PA1B3_HUMAN | PAFAH1B3 | Platelet-activating factor acetylhydrolase IB subunit gamma       |
| Q9UQ80 | PA2G4_HUMAN | PA2G4    | Proliferation-associated protein 2G4                              |
| P11940 | PABP1_HUMAN | PABPC1   | Polyadenylate-binding protein 1                                   |
| Q13310 | PABP4_HUMAN | PABPC4   | Polyadenylate-binding protein 4                                   |
| Q9UNF0 | PACN2_HUMAN | PACSIN2  | Protein kinase C and casein kinase substrate in neurons protein 2 |
| Q9UKS6 | PACN3_HUMAN | PACSIN3  | Protein kinase C and casein kinase substrate in neurons protein 3 |
| Q13177 | PAK2_HUMAN  | PAK2     | Serine/threonine-protein kinase PAK 2                             |
| Q13219 | PAPP1_HUMAN | PAPPA    | Pappalysin-1                                                      |
| Q99497 | PARK7_HUMAN | PARK7    | Protein/nucleic acid deglycase DJ-1                               |
| Q15365 | PCBP1_HUMAN | PCBP1    | Poly(rC)-binding protein 1                                        |
| Q15366 | PCBP2_HUMAN | PCBP2    | Poly(rC)-binding protein 2                                        |
| Q9UN70 | PCDGK_HUMAN | PCDHGC3  | Protocadherin gamma-C3                                            |
| P12004 | PCNA_HUMAN  | PCNA     | Proliferating cell nuclear antigen                                |
| Q8WUM4 | PDC6I_HUMAN | PDCD6IP  | Programmed cell death 6-interacting protein                       |
| O75340 | PDCE6_HUMAN | PDCE6    | Programmed cell death protein 6                                   |
| P07237 | PDIA1_HUMAN | P4HB     | Protein disulfide-isomerase                                       |
| P30101 | PDIA3_HUMAN | PDIA3    | Protein disulfide-isomerase A3                                    |
| P13667 | PDIA4_HUMAN | PDIA4    | Protein disulfide-isomerase A4                                    |
| Q15084 | PDIA6_HUMAN | PDIA6    | Protein disulfide-isomerase A6                                    |

|        |             |         |                                                                          |
|--------|-------------|---------|--------------------------------------------------------------------------|
| Q15121 | PEA15_HUMAN | PEA15   | Astrocytic phosphoprotein PEA-15                                         |
| P30086 | PEBP1_HUMAN | PEBP1   | Phosphatidylethanolamine-binding protein 1                               |
| Q9UBV8 | PEF1_HUMAN  | PEF1    | Peflin                                                                   |
| Q9HAT8 | PELI2_HUMAN | PELI2   | E3 ubiquitin-protein ligase pellino homolog 2                            |
| P12955 | PEPD_HUMAN  | PEPD    | Xaa-Pro dipeptidase                                                      |
| P17858 | PFKAL_HUMAN | PFKL    | ATP-dependent 6-phosphofructokinase                                      |
| P08237 | PFKAM_HUMAN | PFKM    | ATP-dependent 6-phosphofructokinase                                      |
| Q01813 | PFKAP_HUMAN | PFKP    | ATP-dependent 6-phosphofructokinase                                      |
| P18669 | PGAM1_HUMAN | PGAM1   | Phosphoglycerate mutase 1                                                |
| P98160 | PGBM_HUMAN  | HSPG2   | Basement membrane-specific heparan sulfate proteoglycan core protein     |
| P00558 | PGK1_HUMAN  | PGK1    | Phosphoglycerate kinase 1                                                |
| P36871 | PGM1_HUMAN  | PGM1    | Phosphoglucomutase-1                                                     |
| Q9NWX8 | PHAG1_HUMAN | PAG1    | Phosphoprotein associated with glycosphingolipid-enriched microdomains 1 |
| Q99623 | PHB2_HUMAN  | PHB2    | Prohibitin-2                                                             |
| P42356 | PI4KA_HUMAN | PI4KA   | Phosphatidylinositol 4-kinase alpha                                      |
| Q13492 | PICAL_HUMAN | PICALM  | Phosphatidylinositol-binding clathrin assembly protein                   |
| P22061 | PIMT_HUMAN  | PCMT1   | Protein-L-isoaspartate                                                   |
| Q00169 | PIPNA_HUMAN | PITPNA  | Phosphatidylinositol transfer protein alpha isoform                      |
| P48739 | PIPNB_HUMAN | PITPNB  | Phosphatidylinositol transfer protein beta isoform                       |
| Q96CS7 | PKHB2_HUMAN | PLEKHB2 | Pleckstrin homology domain-containing family B member 2                  |
| Q8IV08 | PLD3_HUMAN  | PLD3    | Phospholipase D3                                                         |
| Q15149 | PLEC_HUMAN  | PLEC    | Plectin                                                                  |
| Q9NRY6 | PLS3_HUMAN  | PLSCR3  | Phospholipid scramblase 3                                                |
| P13797 | PLST_HUMAN  | PLS3    | Plastin-3                                                                |
| Q9UIW2 | PLXA1_HUMAN | PLXNA1  | Plexin-A1                                                                |
| O15031 | PLXB2_HUMAN | PLXNB2  | Plexin-B2                                                                |
| O60486 | PLXC1_HUMAN | PLXNC1  | Plexin-C1                                                                |
| P40967 | PMEL_HUMAN  | PMEL    | Melanocyte protein PMEL                                                  |
| P62136 | PP1A_HUMAN  | PPP1CA  | Serine/threonine-protein phosphatase PP1-alpha catalytic subunit         |
| P62140 | PP1B_HUMAN  | PPP1CB  | Serine/threonine-protein phosphatase PP1-beta catalytic subunit          |
| P36873 | PP1G_HUMAN  | PPP1CC  | Serine/threonine-protein phosphatase PP1-gamma catalytic subunit         |
| P67775 | PP2AA_HUMAN | PPP2CA  | Serine/threonine-protein phosphatase 2A catalytic subunit alpha isoform  |
| P62937 | PPIA_HUMAN  | PPIA    | Peptidyl-prolyl cis-trans isomerase A                                    |
| P23284 | PPIB_HUMAN  | PPIB    | Peptidyl-prolyl cis-trans isomerase B                                    |
| Q08752 | PPID_HUMAN  | PPID    | Peptidyl-prolyl cis-trans isomerase D                                    |
| O43447 | PPIH_HUMAN  | PPIH    | Peptidyl-prolyl cis-trans isomerase H                                    |

|        |             |        |                                                 |
|--------|-------------|--------|-------------------------------------------------|
| Q9Y570 | PPME1_HUMAN | PPME1  | Protein phosphatase methylesterase 1            |
| Q06830 | PRDX1_HUMAN | PRDX1  | Peroxiredoxin-1                                 |
| P32119 | PRDX2_HUMAN | PRDX2  | Peroxiredoxin-2                                 |
| P30041 | PRDX6_HUMAN | PRDX6  | Peroxiredoxin-6                                 |
| P04156 | PRIO_HUMAN  | PRNP   | Major prion protein                             |
| P78527 | PRKDC_HUMAN | PRKDC  | DNA-dependent protein kinase catalytic subunit  |
| P07737 | PROF1_HUMAN | PFN1   | Profilin-1                                      |
| P60891 | PRPS1_HUMAN | PRPS1  | Ribose-phosphate pyrophosphokinase 1            |
| P62333 | PRS10_HUMAN | PSMC6  | 26S proteasome regulatory subunit 10B           |
| O95084 | PRS23_HUMAN | PRSS23 | Serine protease 23                              |
| P62191 | PRS4_HUMAN  | PSMC1  | 26S proteasome regulatory subunit 4             |
| P17980 | PRS6A_HUMAN | PSMC3  | 26S proteasome regulatory subunit 6A            |
| P43686 | PRS6B_HUMAN | PSMC4  | 26S proteasome regulatory subunit 6B            |
| P35998 | PRS7_HUMAN  | PSMC2  | 26S proteasome regulatory subunit 7             |
| P62195 | PRS8_HUMAN  | PSMC5  | 26S proteasome regulatory subunit 8             |
| P55786 | PSA_HUMAN   | NPEPPS | Puromycin-sensitive aminopeptidase              |
| P25786 | PSA1_HUMAN  | PSMA1  | Proteasome subunit alpha type-1                 |
| P25787 | PSA2_HUMAN  | PSMA2  | Proteasome subunit alpha type-2                 |
| P25788 | PSA3_HUMAN  | PSMA3  | Proteasome subunit alpha type-3                 |
| P25789 | PSA4_HUMAN  | PSMA4  | Proteasome subunit alpha type-4                 |
| P28066 | PSA5_HUMAN  | PSMA5  | Proteasome subunit alpha type-5                 |
| P60900 | PSA6_HUMAN  | PSMA6  | Proteasome subunit alpha type-6                 |
| O14818 | PSA7_HUMAN  | PSMA7  | Proteasome subunit alpha type-7                 |
| P20618 | PSB1_HUMAN  | PSMB1  | Proteasome subunit beta type-1                  |
| P28070 | PSB4_HUMAN  | PSMB4  | Proteasome subunit beta type-4                  |
| P28074 | PSB5_HUMAN  | PSMB5  | Proteasome subunit beta type-5                  |
| O43653 | PSCA_HUMAN  | PSCA   | Prostate stem cell antigen                      |
| O00231 | PSD11_HUMAN | PSMD11 | 26S proteasome non-ATPase regulatory subunit 11 |
| O00232 | PSD12_HUMAN | PSMD12 | 26S proteasome non-ATPase regulatory subunit 12 |
| Q9UNM6 | PSD13_HUMAN | PSMD13 | 26S proteasome non-ATPase regulatory subunit 13 |
| Q99460 | PSMD1_HUMAN | PSMD1  | 26S proteasome non-ATPase regulatory subunit 1  |
| Q13200 | PSMD2_HUMAN | PSMD2  | 26S proteasome non-ATPase regulatory subunit 2  |
| O43242 | PSMD3_HUMAN | PSMD3  | 26S proteasome non-ATPase regulatory subunit 3  |
| Q16401 | PSMD5_HUMAN | PSMD5  | 26S proteasome non-ATPase regulatory subunit 5  |
| Q15008 | PSMD6_HUMAN | PSMD6  | 26S proteasome non-ATPase regulatory subunit 6  |
| P51665 | PSMD7_HUMAN | PSMD7  | 26S proteasome non-ATPase regulatory subunit 7  |

|        |             |         |                                                                         |
|--------|-------------|---------|-------------------------------------------------------------------------|
| P48556 | PSMD8_HUMAN | PSMD8   | 26S proteasome non-ATPase regulatory subunit 8                          |
| Q06323 | PSME1_HUMAN | PSME1   | Proteasome activator complex subunit 1                                  |
| Q9UL46 | PSME2_HUMAN | PSME2   | Proteasome activator complex subunit 2                                  |
| Q13308 | PTK7_HUMAN  | PTK7    | Inactive tyrosine-protein kinase 7                                      |
| Q9H3S7 | PTN23_HUMAN | PTPN23  | Tyrosine-protein phosphatase non-receptor type 23                       |
| P18433 | PTPRA_HUMAN | PTPRA   | Receptor-type tyrosine-protein phosphatase alpha                        |
| P10586 | PTPRF_HUMAN | PTPRF   | Receptor-type tyrosine-protein phosphatase F                            |
| P23470 | PTPRG_HUMAN | PTPRG   | Receptor-type tyrosine-protein phosphatase gamma                        |
| Q12913 | PTPRJ_HUMAN | PTPRJ   | Receptor-type tyrosine-protein phosphatase eta                          |
| Q13332 | PTPRS_HUMAN | PTPRS   | Receptor-type tyrosine-protein phosphatase S                            |
| P53801 | PTTG_HUMAN  | PTTG1IP | Pituitary tumor-transforming gene 1 protein-interacting protein         |
| P26022 | PTX3_HUMAN  | PTX3    | Pentraxin-related protein PTX3                                          |
| P22102 | PUR2_HUMAN  | GART    | Trifunctional purine biosynthetic protein adenosine-3                   |
| O15067 | PUR4_HUMAN  | PFAS    | Phosphoribosylformylglycinamide synthase                                |
| P22234 | PUR6_HUMAN  | PAICS   | Multifunctional protein ADE2                                            |
| P31939 | PUR9_HUMAN  | ATIC    | Bifunctional purine biosynthesis protein PURH                           |
| P15151 | PVR_HUMAN   | PVR     | Poliovirus receptor                                                     |
| Q92626 | PXDN_HUMAN  | PXDN    | Peroxidasin homolog                                                     |
| P11216 | PYGB_HUMAN  | PYGB    | Glycogen phosphorylase                                                  |
| P06737 | PYGL_HUMAN  | PYGL    | Glycogen phosphorylase                                                  |
| P27708 | PYR1_HUMAN  | CAD     | CAD protein [Includes: Glutamine-dependent carbamoyl-phosphate synthase |
| Q08257 | QOR_HUMAN   | CRYZ    | Quinone oxidoreductase                                                  |
| P61026 | RAB10_HUMAN | RAB10   | Ras-related protein Rab-10                                              |
| P51153 | RAB13_HUMAN | RAB13   | Ras-related protein Rab-13                                              |
| P61106 | RAB14_HUMAN | RAB14   | Ras-related protein Rab-14                                              |
| P62820 | RAB1A_HUMAN | RAB1A   | Ras-related protein Rab-1A                                              |
| Q9H0U4 | RAB1B_HUMAN | RAB1B   | Ras-related protein Rab-1B                                              |
| Q9UL25 | RAB21_HUMAN | RAB21   | Ras-related protein Rab-21                                              |
| P61019 | RAB2A_HUMAN | RAB2A   | Ras-related protein Rab-2A                                              |
| Q13637 | RAB32_HUMAN | RAB32   | Ras-related protein Rab-32                                              |
| Q9BZG1 | RAB34_HUMAN | RAB34   | Ras-related protein Rab-34                                              |
| Q15286 | RAB35_HUMAN | RAB35   | Ras-related protein Rab-35                                              |
| P57729 | RAB38_HUMAN | RAB38   | Ras-related protein Rab-38                                              |
| P61020 | RAB5B_HUMAN | RAB5B   | Ras-related protein Rab-5B                                              |
| P51148 | RAB5C_HUMAN | RAB5C   | Ras-related protein Rab-5C                                              |
| P20340 | RAB6A_HUMAN | RAB6A   | Ras-related protein Rab-6A                                              |

|        |             |         |                                                    |
|--------|-------------|---------|----------------------------------------------------|
| P51149 | RAB7A_HUMAN | RAB7A   | Ras-related protein Rab-7a                         |
| P61006 | RAB8A_HUMAN | RAB8A   | Ras-related protein Rab-8A                         |
| Q92930 | RAB8B_HUMAN | RAB8B   | Ras-related protein Rab-8B                         |
| P51151 | RAB9A_HUMAN | RAB9A   | Ras-related protein Rab-9A                         |
| P63000 | RAC1_HUMAN  | RAC1    | Ras-related C3 botulinum toxin substrate 1         |
| P63244 | RACK1_HUMAN | RACK1   | Receptor of activated protein C kinase 1           |
| P35241 | RADI_HUMAN  | RDX     | Radixin                                            |
| Q8NFI5 | RAI3_HUMAN  | GPRC5A  | Retinoic acid-induced protein 3                    |
| P11233 | RALA_HUMAN  | RALA    | Ras-related protein Ral-A                          |
| P11234 | RALB_HUMAN  | RALB    | Ras-related protein Ral-B                          |
| P62826 | RAN_HUMAN   | RAN     | GTP-binding nuclear protein Ran                    |
| P43487 | RANG_HUMAN  | RANBP1  | Ran-specific GTPase-activating protein             |
| P62834 | RAP1A_HUMAN | RAP1A   | Ras-related protein Rap-1A                         |
| P61224 | RAP1B_HUMAN | RAP1B   | Ras-related protein Rap-1b                         |
| P10114 | RAP2A_HUMAN | RAP2A   | Ras-related protein Rap-2a                         |
| P61225 | RAP2B_HUMAN | RAP2B   | Ras-related protein Rap-2b                         |
| Q9Y3L5 | RAP2C_HUMAN | RAP2C   | Ras-related protein Rap-2c                         |
| P01116 | RASK_HUMAN  | KRAS    | GTPase KRas                                        |
| P01111 | RASN_HUMAN  | NRAS    | GTPase NRas                                        |
| Q15907 | RB11B_HUMAN | RAB11B  | Ras-related protein Rab-11B                        |
| Q9UL26 | RB22A_HUMAN | RAB22A  | Ras-related protein Rab-22A                        |
| P51159 | RB27A_HUMAN | RAB27A  | Ras-related protein Rab-27A                        |
| Q09028 | RBBP4_HUMAN | RBBP4   | Histone-binding protein RBBP4                      |
| P98179 | RBM3_HUMAN  | RBM3    | RNA-binding protein 3                              |
| Q8IUW5 | RELL1_HUMAN | RELL1   | RELT-like protein 1                                |
| Q92900 | RENT1_HUMAN | UPF1    | Regulator of nonsense transcripts 1                |
| Q9H0H5 | RGAP1_HUMAN | RACGAP1 | Rac GTPase-activating protein 1                    |
| O76081 | RGS20_HUMAN | RGS20   | Regulator of G-protein signaling 20                |
| Q96CC6 | RHDF1_HUMAN | RHBDF1  | Inactive rhomboid protein 1                        |
| P61586 | RHOA_HUMAN  | RHOA    | Transforming protein RhoA                          |
| P08134 | RHOC_HUMAN  | RHOC    | Rho-related GTP-binding protein RhoC               |
| P84095 | RHOG_HUMAN  | RHOG    | Rho-related GTP-binding protein RhoG               |
| P13489 | RINI_HUMAN  | RNH1    | Ribonuclease inhibitor                             |
| P23921 | RIR1_HUMAN  | RRM1    | Ribonucleoside-diphosphate reductase large subunit |
| P27635 | RL10_HUMAN  | RPL10   | 60S ribosomal protein L10                          |
| P62906 | RL10A_HUMAN | RPL10A  | 60S ribosomal protein L10a                         |

|        |             |         |                                                                          |
|--------|-------------|---------|--------------------------------------------------------------------------|
| P62913 | RL11_HUMAN  | RPL11   | 60S ribosomal protein L11                                                |
| P30050 | RL12_HUMAN  | RPL12   | 60S ribosomal protein L12                                                |
| P26373 | RL13_HUMAN  | RPL13   | 60S ribosomal protein L13                                                |
| P40429 | RL13A_HUMAN | RPL13A  | 60S ribosomal protein L13a                                               |
| P50914 | RL14_HUMAN  | RPL14   | 60S ribosomal protein L14                                                |
| P61313 | RL15_HUMAN  | RPL15   | 60S ribosomal protein L15                                                |
| P18621 | RL17_HUMAN  | RPL17   | 60S ribosomal protein L17                                                |
| Q07020 | RL18_HUMAN  | RPL18   | 60S ribosomal protein L18                                                |
| Q02543 | RL18A_HUMAN | RPL18A  | 60S ribosomal protein L18a                                               |
| P84098 | RL19_HUMAN  | RPL19   | 60S ribosomal protein L19                                                |
| P46778 | RL21_HUMAN  | RPL21   | 60S ribosomal protein L21                                                |
| P62750 | RL23A_HUMAN | RPL23A  | 60S ribosomal protein L23a                                               |
| P83731 | RL24_HUMAN  | RPL24   | 60S ribosomal protein L24                                                |
| P46776 | RL27A_HUMAN | RPL27A  | 60S ribosomal protein L27a                                               |
| P46779 | RL28_HUMAN  | RPL28   | 60S ribosomal protein L28                                                |
| P39023 | RL3_HUMAN   | RPL3    | 60S ribosomal protein L3                                                 |
| P62888 | RL30_HUMAN  | RPL30   | 60S ribosomal protein L30                                                |
| P62910 | RL32_HUMAN  | RPL32   | 60S ribosomal protein L32                                                |
| P36578 | RL4_HUMAN   | RPL4    | 60S ribosomal protein L4                                                 |
| P62987 | RL40_HUMAN  | UBA52   | Ubiquitin-60S ribosomal protein L40                                      |
| P46777 | RL5_HUMAN   | RPL5    | 60S ribosomal protein L5                                                 |
| Q02878 | RL6_HUMAN   | RPL6    | 60S ribosomal protein L6                                                 |
| P18124 | RL7_HUMAN   | RPL7    | 60S ribosomal protein L7                                                 |
| P62424 | RL7A_HUMAN  | RPL7A   | 60S ribosomal protein L7a                                                |
| P62917 | RL8_HUMAN   | RPL8    | 60S ribosomal protein L8                                                 |
| P32969 | RL9_HUMAN   | RPL9    | 60S ribosomal protein L9                                                 |
| P05388 | RLA0_HUMAN  | RPLP0   | 60S acidic ribosomal protein P0                                          |
| P05387 | RLA2_HUMAN  | RPLP2   | 60S acidic ribosomal protein P2                                          |
| Q8NC42 | RN149_HUMAN | RNF149  | E3 ubiquitin-protein ligase RNF149                                       |
| P09651 | ROA1_HUMAN  | HNRNPA1 | Heterogeneous nuclear ribonucleoprotein A1                               |
| P51991 | ROA3_HUMAN  | HNRNPA3 | Heterogeneous nuclear ribonucleoprotein A3                               |
| Q9Y6N7 | ROBO1_HUMAN | ROBO1   | Roundabout homolog 1                                                     |
| Q01973 | ROR1_HUMAN  | ROR1    | Inactive tyrosine-protein kinase transmembrane receptor ROR1             |
| P04843 | RPN1_HUMAN  | RPN1    | Dolichyl-diphosphooligosaccharide--protein glycosyltransferase subunit 1 |
| Q9HB90 | RRAGC_HUMAN | RRAGC   | Ras-related GTP-binding protein C                                        |
| P10301 | RRAS_HUMAN  | RRAS    | Ras-related protein R-Ras                                                |

|        |             |         |                                   |
|--------|-------------|---------|-----------------------------------|
| P62070 | RRAS2_HUMAN | RRAS2   | Ras-related protein R-Ras2        |
| P46783 | RS10_HUMAN  | RPS10   | 40S ribosomal protein S10         |
| P62280 | RS11_HUMAN  | RPS11   | 40S ribosomal protein S11         |
| P25398 | RS12_HUMAN  | RPS12   | 40S ribosomal protein S12         |
| P62263 | RS14_HUMAN  | RPS14   | 40S ribosomal protein S14         |
| P62244 | RS15A_HUMAN | RPS15A  | 40S ribosomal protein S15a        |
| P62249 | RS16_HUMAN  | RPS16   | 40S ribosomal protein S16         |
| P08708 | RS17_HUMAN  | RPS17   | 40S ribosomal protein S17         |
| P62269 | RS18_HUMAN  | RPS18   | 40S ribosomal protein S18         |
| P15880 | RS2_HUMAN   | RPS2    | 40S ribosomal protein S2          |
| P60866 | RS20_HUMAN  | RPS20   | 40S ribosomal protein S20         |
| P62266 | RS23_HUMAN  | RPS23   | 40S ribosomal protein S23         |
| P62847 | RS24_HUMAN  | RPS24   | 40S ribosomal protein S24         |
| P62851 | RS25_HUMAN  | RPS25   | 40S ribosomal protein S25         |
| P62854 | RS26_HUMAN  | RPS26   | 40S ribosomal protein S26         |
| P42677 | RS27_HUMAN  | RPS27   | 40S ribosomal protein S27         |
| P23396 | RS3_HUMAN   | RPS3    | 40S ribosomal protein S3          |
| P61247 | RS3A_HUMAN  | RPS3A   | 40S ribosomal protein S3a         |
| P62701 | RS4X_HUMAN  | RPS4X   | 40S ribosomal protein S4          |
| P46782 | RS5_HUMAN   | RPS5    | 40S ribosomal protein S5          |
| P62753 | RS6_HUMAN   | RPS6    | 40S ribosomal protein S6          |
| P62081 | RS7_HUMAN   | RPS7    | 40S ribosomal protein S7          |
| P62241 | RS8_HUMAN   | RPS8    | 40S ribosomal protein S8          |
| P46781 | RS9_HUMAN   | RPS9    | 40S ribosomal protein S9          |
| P08865 | RSSA_HUMAN  | RPSA    | 40S ribosomal protein SA          |
| Q9Y310 | RTCB_HUMAN  | RTCB    | tRNA-splicing ligase RtcB homolog |
| Q9NQC3 | RTN4_HUMAN  | RTN4    | Reticulon-4                       |
| Q9Y265 | RUVB1_HUMAN | RUVBL1  | RuvB-like 1                       |
| Q9Y230 | RUVB2_HUMAN | RUVBL2  | RuvB-like 2                       |
| P04271 | S100B_HUMAN | S100B   | Protein S100-B                    |
| P23297 | S10A1_HUMAN | S100A1  | Protein S100-A1                   |
| P06703 | S10A6_HUMAN | S100A6  | Protein S100-A6                   |
| P60903 | S10AA_HUMAN | S100A10 | Protein S100-A10                  |
| P31949 | S10AB_HUMAN | S100A11 | Protein S100-A11                  |
| Q99584 | S10AD_HUMAN | S100A13 | Protein S100-A13                  |
| P55011 | S12A2_HUMAN | SLC12A2 | Solute carrier family 12 member 2 |



|        |             |          |                                                       |
|--------|-------------|----------|-------------------------------------------------------|
| Q8WUM9 | S20A1_HUMAN | SLC20A1  | Sodium-dependent phosphate transporter 1              |
| Q9UGH3 | S23A2_HUMAN | SLC23A2  | Solute carrier family 23 member 2                     |
| P50443 | S26A2_HUMAN | SLC26A2  | Sulfate transporter                                   |
| Q99808 | S29A1_HUMAN | SLC29A1  | Equilibrative nucleoside transporter 1                |
| Q96QD8 | S38A2_HUMAN | SLC38A2  | Sodium-coupled neutral amino acid transporter 2       |
| Q9ULF5 | S39AA_HUMAN | SLC39A10 | Zinc transporter ZIP10                                |
| Q15043 | S39AE_HUMAN | SLC39A14 | Zinc transporter ZIP14                                |
| Q8NBI5 | S43A3_HUMAN | SLC43A3  | Solute carrier family 43 member 3                     |
| Q9Y6M7 | S4A7_HUMAN  | SLC4A7   | Sodium bicarbonate cotransporter 3                    |
| Q9UBT2 | SAE2_HUMAN  | UBA2     | SUMO-activating enzyme subunit 2                      |
| P23526 | SAHH_HUMAN  | AHCY     | Adenosylhomocysteinase                                |
| O43865 | SAHH2_HUMAN | AHCYL1   | S-adenosylhomocysteine hydrolase-like protein 1       |
| P43007 | SATT_HUMAN  | SLC1A4   | Neutral amino acid transporter A                      |
| Q9Y3A5 | SBDS_HUMAN  | SBDS     | Ribosome maturation protein SBDS                      |
| O75396 | SC22B_HUMAN | SEC22B   | Vesicle-trafficking protein SEC22b                    |
| Q15436 | SC23A_HUMAN | SEC23A   | Protein transport protein Sec23A                      |
| O94979 | SC31A_HUMAN | SEC31A   | Protein transport protein Sec31A                      |
| P53794 | SC5A3_HUMAN | SLC5A3   | Sodium/myo-inositol cotransporter                     |
| Q9Y289 | SC5A6_HUMAN | SLC5A6   | Sodium-dependent multivitamin transporter             |
| P31641 | SC6A6_HUMAN | SLC6A6   | Sodium- and chloride-dependent taurine transporter    |
| P48029 | SC6A8_HUMAN | SLC6A8   | Sodium- and chloride-dependent creatine transporter 1 |
| O15126 | SCAM1_HUMAN | SCAMP1   | Secretory carrier-associated membrane protein 1       |
| O15127 | SCAM2_HUMAN | SCAMP2   | Secretory carrier-associated membrane protein 2       |
| O14828 | SCAM3_HUMAN | SCAMP3   | Secretory carrier-associated membrane protein 3       |
| Q969E2 | SCAM4_HUMAN | SCAMP4   | Secretory carrier-associated membrane protein 4       |
| Q8WTV0 | SCRB1_HUMAN | SCARB1   | Scavenger receptor class B member 1                   |
| Q14108 | SCRB2_HUMAN | SCARB2   | Lysosome membrane protein 2                           |
| Q14160 | SCRIB_HUMAN | SCRIB    | Protein scribble homolog                              |
| Q12765 | SCRN1_HUMAN | SCRN1    | Secernin-1                                            |
| P18827 | SDC1_HUMAN  | SDC1     | Syndecan-1                                            |
| P34741 | SDC2_HUMAN  | SDC2     | Syndecan-2                                            |
| P31431 | SDC4_HUMAN  | SDC4     | Syndecan-4                                            |
| O00560 | SDCB1_HUMAN | SDCBP    | Syntenin-1                                            |
| O75326 | SEM7A_HUMAN | SEMA7A   | Semaphorin-7A                                         |
| Q9NVA2 | SEP11_HUMAN | SEPT11   | Septin-11                                             |
| Q15019 | SEPT2_HUMAN | SEPT2    | Septin-2                                              |

|        |             |          |                                                            |
|--------|-------------|----------|------------------------------------------------------------|
| Q14141 | SEPT6_HUMAN | SEPT6    | Septin-6                                                   |
| Q16181 | SEPT7_HUMAN | SEPT7    | Septin-7                                                   |
| Q92599 | SEPT8_HUMAN | SEPT8    | Septin-8                                                   |
| Q9UHD8 | SEPT9_HUMAN | SEPT9    | Septin-9                                                   |
| O43175 | SERA_HUMAN  | PHGDH    | D-3-phosphoglycerate dehydrogenase                         |
| Q9Y617 | SERC_HUMAN  | PSAT1    | Phosphoserine aminotransferase                             |
| Q9NRX5 | SERC1_HUMAN | SERINC1  | Serine incorporator 1                                      |
| Q13530 | SERC3_HUMAN | SERINC3  | Serine incorporator 3                                      |
| Q86VE9 | SERC5_HUMAN | SERINC5  | Serine incorporator 5                                      |
| P50454 | SERPH_HUMAN | SERPINH1 | Serpin H1                                                  |
| O75533 | SF3B1_HUMAN | SF3B1    | Splicing factor 3B subunit 1                               |
| Q8N474 | SFRP1_HUMAN | SFRP1    | Secreted frizzled-related protein 1                        |
| Q16585 | SGCB_HUMAN  | SGCB     | Beta-sarcoglycan                                           |
| Q92629 | SGCD_HUMAN  | SGCD     | Delta-sarcoglycan                                          |
| Q9P0V3 | SH3B4_HUMAN | SH3BP4   | SH3 domain-binding protein 4                               |
| Q99961 | SH3G1_HUMAN | SH3GL1   | Endophilin-A2                                              |
| Q96B97 | SH3K1_HUMAN | SH3KBP1  | SH3 domain-containing kinase-binding protein 1             |
| P78324 | SHPS1_HUMAN | SIRPA    | Tyrosine-protein phosphatase non-receptor type substrate 1 |
| Q9NR45 | SIAS_HUMAN  | NANS     | Sialic acid synthase                                       |
| P63208 | SKP1_HUMAN  | SKP1     | S-phase kinase-associated protein 1                        |
| Q9HAU4 | SMUF2_HUMAN | SMURF2   | E3 ubiquitin-protein ligase SMURF2                         |
| P54920 | SNAA_HUMAN  | NAPA     | Alpha-soluble NSF attachment protein                       |
| Q7KZF4 | SND1_HUMAN  | SND1     | Staphylococcal nuclease domain-containing protein 1        |
| O00161 | SNP23_HUMAN | SNAP23   | Synaptosomal-associated protein 23                         |
| Q13884 | SNTB1_HUMAN | SNTB1    | Beta-1-syntrophin                                          |
| Q13425 | SNTB2_HUMAN | SNTB2    | Beta-2-syntrophin                                          |
| O60749 | SNX2_HUMAN  | SNX2     | Sorting nexin-2                                            |
| O60493 | SNX3_HUMAN  | SNX3     | Sorting nexin-3                                            |
| Q8WV41 | SNX33_HUMAN | SNX33    | Sorting nexin-33                                           |
| Q9Y5X1 | SNX9_HUMAN  | SNX9     | Sorting nexin-9                                            |
| P00441 | SODC_HUMAN  | SOD1     | Superoxide dismutase [Cu-Zn]                               |
| P30626 | SORCN_HUMAN | SRI      | Sorcin                                                     |
| Q99523 | SORT_HUMAN  | SORT1    | Sortilin                                                   |
| P35237 | SPB6_HUMAN  | SERPINB6 | Serpin B6                                                  |
| P19623 | SPEE_HUMAN  | SRM      | Spermidine synthase                                        |
| P52788 | SPSY_HUMAN  | SMS      | Spermine synthase                                          |

|        |             |        |                                                               |
|--------|-------------|--------|---------------------------------------------------------------|
| Q01082 | SPTB2_HUMAN | SPTBN1 | Spectrin beta chain                                           |
| Q13813 | SPTN1_HUMAN | SPTAN1 | Spectrin alpha chain                                          |
| Q13501 | SQSTM_HUMAN | SQSTM1 | Sequestosome-1                                                |
| P12931 | SRC_HUMAN   | SRC    | Proto-oncogene tyrosine-protein kinase Src                    |
| Q14247 | SRC8_HUMAN  | CTTN   | Src substrate cortactin                                       |
| P49458 | SRP09_HUMAN | SRP9   | Signal recognition particle 9 kDa protein                     |
| P37108 | SRP14_HUMAN | SRP14  | Signal recognition particle 14 kDa protein                    |
| P84103 | SRSF3_HUMAN | SRSF3  | Serine/arginine-rich splicing factor 3                        |
| O95630 | STABP_HUMAN | STAMBP | STAM-binding protein                                          |
| Q92783 | STAM1_HUMAN | STAM   | Signal transducing adapter molecule 1                         |
| O75886 | STAM2_HUMAN | STAM2  | Signal transducing adapter molecule 2                         |
| P42224 | STAT1_HUMAN | STAT1  | Signal transducer and activator of transcription 1-alpha/beta |
| P31948 | STIP1_HUMAN | STIP1  | Stress-induced-phosphoprotein 1                               |
| O94804 | STK10_HUMAN | STK10  | Serine/threonine-protein kinase 10                            |
| Q9Y6E0 | STK24_HUMAN | STK24  | Serine/threonine-protein kinase 24                            |
| P27105 | STOM_HUMAN  | STOM   | Erythrocyte band 7 integral membrane protein                  |
| Q9Y3F4 | STRAP_HUMAN | STRAP  | Serine-threonine kinase receptor-associated protein           |
| Q86Y82 | STX12_HUMAN | STX12  | Syntaxin-12                                                   |
| Q13277 | STX3_HUMAN  | STX3   | Syntaxin-3                                                    |
| Q12846 | STX4_HUMAN  | STX4   | Syntaxin-4                                                    |
| O15400 | STX7_HUMAN  | STX7   | Syntaxin-7                                                    |
| P61764 | STXB1_HUMAN | STXBP1 | Syntaxin-binding protein 1                                    |
| Q15833 | STXB2_HUMAN | STXBP2 | Syntaxin-binding protein 2                                    |
| O00186 | STXB3_HUMAN | STXBP3 | Syntaxin-binding protein 3                                    |
| Q8NHG7 | SVIP_HUMAN  | SVIP   | Small VCP/p97-interacting protein                             |
| P49588 | SYAC_HUMAN  | AARS   | Alanine--tRNA ligase                                          |
| P14868 | SYDC_HUMAN  | DARS   | Aspartate--tRNA ligase                                        |
| P07814 | SYEP_HUMAN  | EPRS   | Bifunctional glutamate/proline--tRNA ligase                   |
| P41252 | SYIC_HUMAN  | IARS   | Isoleucine--tRNA ligase                                       |
| P56192 | SYMC_HUMAN  | MARS   | Methionine--tRNA ligase                                       |
| Q16563 | SYPL1_HUMAN | SYPL1  | Synaptophysin-like protein 1                                  |
| P54136 | SYRC_HUMAN  | RARS   | Arginine--tRNA ligase                                         |
| P49591 | SYSC_HUMAN  | SARS   | Serine--tRNA ligase                                           |
| P26639 | SYTC_HUMAN  | TARS   | Threonine--tRNA ligase                                        |
| P26640 | SYVC_HUMAN  | VARS   | Valine--tRNA ligase                                           |
| P23381 | SYWC_HUMAN  | WARS   | Tryptophan--tRNA ligase                                       |

|        |             |          |                                                 |
|--------|-------------|----------|-------------------------------------------------|
| P37802 | TAGL2_HUMAN | TAGLN2   | Transgelin-2                                    |
| P37837 | TALDO_HUMAN | TALDO1   | Transaldolase                                   |
| Q7L7X3 | TAOK1_HUMAN | TAOK1    | Serine/threonine-protein kinase TAO1            |
| Q9H2K8 | TAOK3_HUMAN | TAOK3    | Serine/threonine-protein kinase TAO3            |
| Q9BXI6 | TB10A_HUMAN | TBC1D10A | TBC1 domain family member 10A                   |
| Q71U36 | TBA1A_HUMAN | TUBA1A   | Tubulin alpha-1A chain                          |
| P68363 | TBA1B_HUMAN | TUBA1B   | Tubulin alpha-1B chain                          |
| Q9BQE3 | TBA1C_HUMAN | TUBA1C   | Tubulin alpha-1C chain                          |
| P68366 | TBA4A_HUMAN | TUBA4A   | Tubulin alpha-4A chain                          |
| Q9H4B7 | TBB1_HUMAN  | TUBB1    | Tubulin beta-1 chain                            |
| Q9BVA1 | TBB2B_HUMAN | TUBB2B   | Tubulin beta-2B chain                           |
| Q13509 | TBB3_HUMAN  | TUBB3    | Tubulin beta-3 chain                            |
| P04350 | TBB4A_HUMAN | TUBB4A   | Tubulin beta-4A chain                           |
| P68371 | TBB4B_HUMAN | TUBB4B   | Tubulin beta-4B chain                           |
| P07437 | TBB5_HUMAN  | TUBB     | Tubulin beta chain                              |
| Q9BUF5 | TBB6_HUMAN  | TUBB6    | Tubulin beta-6 chain                            |
| Q3ZCM7 | TBB8_HUMAN  | TUBB8    | Tubulin beta-8 chain                            |
| O75347 | TBCA_HUMAN  | TBCA     | Tubulin-specific chaperone A                    |
| P17987 | TCPA_HUMAN  | TCP1     | T-complex protein 1 subunit alpha               |
| P78371 | TCPB_HUMAN  | CCT2     | T-complex protein 1 subunit beta                |
| P50991 | TCPD_HUMAN  | CCT4     | T-complex protein 1 subunit delta               |
| P48643 | TCPE_HUMAN  | CCT5     | T-complex protein 1 subunit epsilon             |
| P49368 | TCPG_HUMAN  | CCT3     | T-complex protein 1 subunit gamma               |
| Q99832 | TCPH_HUMAN  | CCT7     | T-complex protein 1 subunit eta                 |
| P50990 | TCPQ_HUMAN  | CCT8     | T-complex protein 1 subunit theta               |
| P40227 | TCPZ_HUMAN  | CCT6A    | T-complex protein 1 subunit zeta                |
| P13693 | TCTP_HUMAN  | TPT1     | Translationally-controlled tumor protein        |
| Q15185 | TEBP_HUMAN  | PTGES3   | Prostaglandin E synthase 3                      |
| Q9P273 | TEN3_HUMAN  | TENM3    | Teneurin-3                                      |
| P24821 | TENA_HUMAN  | TNC      | Tenascin                                        |
| Q68CZ2 | TENS3_HUMAN | TNS3     | Tensin-3                                        |
| P55072 | TERA_HUMAN  | VCP      | Transitional endoplasmic reticulum ATPase       |
| Q92734 | TFG_HUMAN   | TFG      | Protein TFG                                     |
| P02786 | TFR1_HUMAN  | TFRC     | Transferrin receptor protein 1                  |
| O43493 | TGON2_HUMAN | TGOLN2   | Trans-Golgi network integral membrane protein 2 |
| Q9BWD1 | THIC_HUMAN  | ACAT2    | Acetyl-CoA acetyltransferase                    |

|        |             |           |                                                                  |
|--------|-------------|-----------|------------------------------------------------------------------|
| P10599 | THIO_HUMAN  | TXN       | Thioredoxin                                                      |
| P00734 | THRB_HUMAN  | F2        | Prothrombin                                                      |
| P01266 | THYG_HUMAN  | TG        | Thyroglobulin                                                    |
| P35625 | TIMP3_HUMAN | TIMP3     | Metalloproteinase inhibitor 3                                    |
| O75663 | TIPRL_HUMAN | TIPRL     | TIP41-like protein                                               |
| P29401 | TKT_HUMAN   | TKT       | Transketolase                                                    |
| Q9Y490 | TLN1_HUMAN  | TLN1      | Talin-1                                                          |
| O75674 | TM1L1_HUMAN | TOM1L1    | TOM1-like protein 1                                              |
| Q99805 | TM9S2_HUMAN | TM9SF2    | Transmembrane 9 superfamily member 2                             |
| P49755 | TMEDA_HUMAN | TMED10    | Transmembrane emp24 domain-containing protein 10                 |
| Q9BXS4 | TMM59_HUMAN | TMEM59    | Transmembrane protein 59                                         |
| Q9UKE5 | TNIK_HUMAN  | TNIK      | TRAF2 and NCK-interacting protein kinase                         |
| Q92973 | TNPO1_HUMAN | TNPO1     | Transportin-1                                                    |
| P08138 | TNR16_HUMAN | NGFR      | Tumor necrosis factor receptor superfamily member 16             |
| Q9H0E2 | TOLIP_HUMAN | TOLLIP    | Toll-interacting protein                                         |
| O60784 | TOM1_HUMAN  | TOM1      | Target of Myb protein 1                                          |
| Q12974 | TP4A2_HUMAN | PTP4A2    | Protein tyrosine phosphatase type IVA 2                          |
| P00750 | TPA_HUMAN   | PLAT      | Tissue-type plasminogen activator                                |
| P60174 | TPIS_HUMAN  | TPI1      | Triosephosphate isomerase                                        |
| P67936 | TPM4_HUMAN  | TPM4      | Tropomyosin alpha-4 chain                                        |
| P29144 | TPP2_HUMAN  | TPP2      | Tripeptidyl-peptidase 2                                          |
| O14763 | TR10B_HUMAN | TNFRSF10B | Tumor necrosis factor receptor superfamily member 10B            |
| P08582 | TRFM_HUMAN  | MELTF     | Melanotransferrin                                                |
| Q9Y5S1 | TRPV2_HUMAN | TRPV2     | Transient receptor potential cation channel subfamily V member 2 |
| Q9HBA0 | TRPV4_HUMAN | TRPV4     | Transient receptor potential cation channel subfamily V member 4 |
| Q8NHM4 | TRY6_HUMAN  | PRSS3P2   | Putative trypsin-6                                               |
| Q99816 | TS101_HUMAN | TSG101    | Tumor susceptibility gene 101 protein                            |
| Q15631 | TSN_HUMAN   | TSN       | Translin                                                         |
| Q9H1Z9 | TSN10_HUMAN | TSPAN10   | Tetraspanin-10                                                   |
| Q8NG11 | TSN14_HUMAN | TSPAN14   | Tetraspanin-14                                                   |
| O60637 | TSN3_HUMAN  | TSPAN3    | Tetraspanin-3                                                    |
| O14817 | TSN4_HUMAN  | TSPAN4    | Tetraspanin-4                                                    |
| O43657 | TSN6_HUMAN  | TSPAN6    | Tetraspanin-6                                                    |
| O75954 | TSN9_HUMAN  | TSPAN9    | Tetraspanin-9                                                    |
| P07996 | TSP1_HUMAN  | THBS1     | Thrombospondin-1                                                 |
| Q14166 | TTL12_HUMAN | TTLL12    | Tubulin--tyrosine ligase-like protein 12                         |

|        |             |          |                                                          |
|--------|-------------|----------|----------------------------------------------------------|
| Q9BSA4 | TTYH2_HUMAN | TTYH2    | Protein tweety homolog 2                                 |
| Q9C0H2 | TTYH3_HUMAN | TTYH3    | Protein tweety homolog 3                                 |
| Q12792 | TWF1_HUMAN  | TWF1     | Twinfilin-1                                              |
| Q8NBS9 | TXND5_HUMAN | TXNDC5   | Thioredoxin domain-containing protein 5                  |
| O43396 | TXNL1_HUMAN | TXNL1    | Thioredoxin-like protein 1                               |
| P17643 | TYRP1_HUMAN | TYRP1    | 5,6-dihydroxyindole-2-carboxylic acid oxidase            |
| P68036 | UB2L3_HUMAN | UBE2L3   | Ubiquitin-conjugating enzyme E2 L3                       |
| Q15819 | UB2V2_HUMAN | UBE2V2   | Ubiquitin-conjugating enzyme E2 variant 2                |
| P22314 | UBA1_HUMAN  | UBA1     | Ubiquitin-like modifier-activating enzyme 1              |
| P61081 | UBC12_HUMAN | UBE2M    | NEDD8-conjugating enzyme Ubc12                           |
| P61088 | UBE2N_HUMAN | UBE2N    | Ubiquitin-conjugating enzyme E2 N                        |
| P54578 | UBP14_HUMAN | USP14    | Ubiquitin carboxyl-terminal hydrolase 14                 |
| P45974 | UBP5_HUMAN  | USP5     | Ubiquitin carboxyl-terminal hydrolase 5                  |
| Q8TF42 | UBS3B_HUMAN | UBASH3B  | Ubiquitin-associated and SH3 domain-containing protein B |
| Q9HAC8 | UBTD1_HUMAN | UBTD1    | Ubiquitin domain-containing protein 1                    |
| Q8IX04 | UEVLD_HUMAN | UEVLD    | Ubiquitin-conjugating enzyme E2 variant 3                |
| O60701 | UGDH_HUMAN  | UGDH     | UDP-glucose 6-dehydrogenase                              |
| Q16851 | UGPA_HUMAN  | UGP2     | UTP--glucose-1-phosphate uridylyltransferase             |
| Q9BZM4 | ULBP3_HUMAN | ULBP3    | UL16-binding protein 3                                   |
| Q03405 | UPAR_HUMAN  | PLAUR    | Urokinase plasminogen activator surface receptor         |
| Q86UX7 | URP2_HUMAN  | FERMT3   | Fermitin family homolog 3                                |
| Q93008 | USP9X_HUMAN | USP9X    | Probable ubiquitin carboxyl-terminal hydrolase FAF-X     |
| P46939 | UTRO_HUMAN  | UTRN     | Utrophin                                                 |
| P61421 | VA0D1_HUMAN | ATP6V0D1 | V-type proton ATPase subunit d 1                         |
| Q15836 | VAMP3_HUMAN | VAMP3    | Vesicle-associated membrane protein 3                    |
| P51809 | VAMP7_HUMAN | VAMP7    | Vesicle-associated membrane protein 7                    |
| Q8TAA9 | VANG1_HUMAN | VANGL1   | Vang-like protein 1                                      |
| P50552 | VASP_HUMAN  | VASP     | Vasodilator-stimulated phosphoprotein                    |
| Q99536 | VAT1_HUMAN  | VAT1     | Synaptic vesicle membrane protein VAT-1 homolog          |
| P38606 | VATA_HUMAN  | ATP6V1A  | V-type proton ATPase catalytic subunit A                 |
| P21281 | VATB2_HUMAN | ATP6V1B2 | V-type proton ATPase subunit B                           |
| P21283 | VATC1_HUMAN | ATP6V1C1 | V-type proton ATPase subunit C 1                         |
| P36543 | VATE1_HUMAN | ATP6V1E1 | V-type proton ATPase subunit E 1                         |
| Q9UI12 | VATH_HUMAN  | ATP6V1H  | V-type proton ATPase subunit H                           |
| P21796 | VDAC1_HUMAN | VDAC1    | Voltage-dependent anion-selective channel protein 1      |
| P08670 | VIME_HUMAN  | VIM      | Vimentin                                                 |

|        |             |          |                                                          |
|--------|-------------|----------|----------------------------------------------------------|
| P18206 | VINC_HUMAN  | VCL      | Vinculin                                                 |
| Q9H9H4 | VP37B_HUMAN | VPS37B   | Vacuolar protein sorting-associated protein 37B          |
| Q93050 | VPP1_HUMAN  | ATP6V0A1 | V-type proton ATPase 116 kDa subunit a isoform 1         |
| Q9BRG1 | VPS25_HUMAN | VPS25    | Vacuolar protein-sorting-associated protein 25           |
| Q9UK41 | VPS28_HUMAN | VPS28    | Vacuolar protein sorting-associated protein 28 homolog   |
| Q9UBQ0 | VPS29_HUMAN | VPS29    | Vacuolar protein sorting-associated protein 29           |
| Q96QK1 | VPS35_HUMAN | VPS35    | Vacuolar protein sorting-associated protein 35           |
| Q9UN37 | VPS4A_HUMAN | VPS4A    | Vacuolar protein sorting-associated protein 4A           |
| O75351 | VPS4B_HUMAN | VPS4B    | Vacuolar protein sorting-associated protein 4B           |
| Q9NP79 | VTA1_HUMAN  | VTA1     | Vacuolar protein sorting-associated protein VTA1 homolog |
| P04004 | VTNC_HUMAN  | VTN      | Vitronectin                                              |
| Q9Y6W5 | WASF2_HUMAN | WASF2    | Wiskott-Aldrich syndrome protein family member 2         |
| O00401 | WASL_HUMAN  | WASL     | Neural Wiskott-Aldrich syndrome protein                  |
| Q969T9 | WBP2_HUMAN  | WBP2     | WW domain-binding protein 2                              |
| Q8IWB7 | WDFY1_HUMAN | WDFY1    | WD repeat and FYVE domain-containing protein 1           |
| O75083 | WDR1_HUMAN  | WDR1     | WD repeat-containing protein 1                           |
| Q9GZS3 | WDR61_HUMAN | WDR61    | WD repeat-containing protein 61                          |
| Q9UPY5 | XCT_HUMAN   | SLC7A11  | Cystine/glutamate transporter                            |
| O14980 | XPO1_HUMAN  | XPO1     | Exportin-1                                               |
| Q9NQW7 | XPP1_HUMAN  | XPNPEP1  | Xaa-Pro aminopeptidase 1                                 |
| O75695 | XRP2_HUMAN  | RP2      | Protein XRP2                                             |
| P67809 | YBOX1_HUMAN | YBX1     | Nuclease-sensitive element-binding protein 1             |
| P07947 | YES_HUMAN   | YES1     | Tyrosine-protein kinase Yes                              |
| O15498 | YKT6_HUMAN  | YKT6     | Synaptobrevin homolog YKT6                               |
| Q7Z2W4 | ZCCHV_HUMAN | ZC3HAV1  | Zinc finger CCCH-type antiviral protein 1                |
| Q9C0B5 | ZDHC5_HUMAN | ZDHHC5   | Palmitoyltransferase ZDHHC5                              |
| Q9Y6M5 | ZNT1_HUMAN  | SLC30A1  | Zinc transporter 1                                       |
| Q07157 | ZO1_HUMAN   | TJP1     | Tight junction protein ZO-1                              |
| Q9UDY2 | ZO2_HUMAN   | TJP2     | Tight junction protein ZO-2                              |
| Q15942 | ZYX_HUMAN   | ZYX      | Zyxin                                                    |
