# Supplementary material for: Use of extracellular vesicles from lymphatic drainage as surrogate markers of melanoma progression and BRAFV600E mutation
Source: PubMed Central journal article supplement — J Exp Med. 2019 Apr 11;216(5):1061–70. doi: 10.1084/jem.20181522 (PMC6504207; doi:10.1084/jem.20181522), 2019-04-11
Supplement: JEM_20181522_TableS5.pdf [file JEM_20181522_TableS5.pdf]

**Table S5. Differentially expressed proteins between melanoma and melanocytes-derived exo**

| Gene names | Protein IDs | t-test Significant T vs C | Log2 ratio T vs C | t-test Significant WM164 vs C | Log2 ratio WM164 vs C | t-test Significant SKMel28 vs C | Log2 ratio SKMel28 vs C | t-test Significant SKMel103 vs C | Log2 ratio SKMel103 vs C |
|------------|-------------|---------------------------|-------------------|-------------------------------|-----------------------|---------------------------------|-------------------------|----------------------------------|--------------------------|
| TNC        | P24821      | +                         | 10.61             | +                             | 9.31                  | +                               | 10.00                   | +                                | 11.75                    |
| HSPG2      | P98160      | +                         | 9.51              | +                             | 11.54                 | +                               | 10.30                   | +                                | 7.82                     |
| ITGA4      | P13612      | +                         | 8.57              | +                             | 9.14                  | +                               | 8.20                    | +                                | 8.45                     |
| ITGA6      | P23229      | +                         | 7.29              | +                             | 7.14                  | +                               | 6.78                    | +                                | 7.69                     |
| HIC2       | Q96JB3      | +                         | 6.89              |                               | 0.23                  | +                               | 5.85                    | +                                | 11.52                    |
| VCAN       | P13611      | +                         | 6.80              | +                             | 5.77                  |                                 | 1.08                    | +                                | 10.84                    |
| EDIL3      | O43854      | +                         | 6.46              |                               | -0.41                 |                                 | -0.34                   | +                                | 14.67                    |
| ANXA1      | P04083      | +                         | 6.31              | +                             | 3.77                  | +                               | 7.11                    | +                                | 7.35                     |
| PLAUR      | Q03405      | +                         | 5.64              | +                             | 2.26                  | +                               | 5.14                    | +                                | 7.96                     |
| SH3GL1     | Q99961      | +                         | 5.63              | +                             | 5.86                  | +                               | 3.76                    | +                                | 6.60                     |
| CD55       | P08174      | +                         | 5.56              | +                             | 5.94                  | +                               | 5.16                    | +                                | 5.57                     |
| TSPAN6     | O43657      | +                         | 5.52              | +                             | 7.11                  | +                               | 4.67                    | +                                | 5.07                     |
| LGALS3BP   | Q08380      | +                         | 5.38              | +                             | 6.12                  | +                               | 4.19                    | +                                | 5.64                     |
| MCAM       | P43121      | +                         | 5.25              | +                             | 5.89                  | +                               | 6.34                    | +                                | 4.20                     |
| CPNE8      | Q86YQ8      | +                         | 5.16              | +                             | 4.43                  | +                               | 6.08                    | +                                | 5.05                     |
| CD151      | P48509      | +                         | 5.08              | +                             | 6.11                  | +                               | 5.24                    | +                                | 4.37                     |
| ITGA2      | P17301      | +                         | 4.96              | +                             | 3.06                  | +                               | 5.47                    | +                                | 5.80                     |
| SH3BP4     | Q9P0V3      | +                         | 4.89              | +                             | 5.12                  | +                               | 5.75                    | +                                | 4.23                     |
| SDC4       | P31431      | +                         | 4.75              | +                             | 4.05                  | +                               | 2.87                    | +                                | 6.30                     |
| PACSIN2    | Q9UNF0      | +                         | 4.59              | +                             | 5.29                  | +                               | 5.59                    | +                                | 3.57                     |
| PACSIN3    | Q9UKS6      | +                         | 4.55              | +                             | 5.22                  | +                               | 4.58                    | +                                | 4.12                     |
| HEG1       | Q9ULI3      | +                         | 4.51              | +                             | 3.18                  | +                               | 2.76                    | +                                | 6.35                     |
| GJC1       | P36383      | +                         | 4.50              | +                             | 5.87                  | +                               | 4.54                    | +                                | 3.66                     |
| BSG        | P35613      | +                         | 4.38              | +                             | 5.12                  | +                               | 4.42                    | +                                | 3.91                     |
| PVR        | P15151      | +                         | 4.36              | +                             | 2.46                  | +                               | 4.73                    | +                                | 5.27                     |
| NGFR       | P08138      | +                         | 4.29              |                               | -0.25                 | +                               | 3.03                    | +                                | 7.78                     |
| HLA-DRB1   | P01912      | +                         | 4.26              | +                             | -1.03                 | +                               | 3.44                    | +                                | 7.93                     |
| PTGFRN     | Q9P2B2      | +                         | 4.26              | +                             | 4.95                  | +                               | 3.56                    | +                                | 4.26                     |
| MELTF      | P08582      | +                         | 4.26              | +                             | 4.46                  | +                               | 4.05                    | +                                | 4.26                     |

|          |        |   |      |   |       |   |       |   |       |
|----------|--------|---|------|---|-------|---|-------|---|-------|
| EPHA2    | P29317 | + | 4.25 |   | 0.62  | + | 2.17  | + | 7.67  |
| SLC39A14 | Q15043 | + | 4.23 | + | 6.21  | + | 5.40  | + | 2.35  |
| HLA-B    | P30462 | + | 4.23 | + | 4.15  |   | 1.04  | + | 6.20  |
| SLC44A1  | Q8WWI5 | + | 4.21 | + | 4.93  | + | 3.73  | + | 4.07  |
| HP       | P00738 | + | 4.19 | + | 4.17  | + | 3.49  | + | 4.62  |
| HLA-DRA  | P01903 | + | 4.16 | + | -1.38 | + | 3.94  | + | 7.62  |
| CD82     | P27701 | + | 4.15 | + | 4.93  | + | 5.19  | + | 3.05  |
| PABPC1   | P11940 | + | 3.99 |   | -0.64 | + | 3.68  | + | 6.95  |
| ICAM1    | P05362 | + | 3.97 | + | 8.08  | + | 8.32  | + | -1.10 |
| FMNL2    | Q96PY5 | + | 3.96 | + | 4.18  | + | 3.97  | + | 3.82  |
| HLA-DPB1 | P04440 | + | 3.87 |   | 0.54  | + | 3.70  | + | 5.98  |
| SLC16A1  | P53985 | + | 3.86 | + | 4.70  | + | 5.06  | + | 2.63  |
| TFRC     | P02786 | + | 3.82 | + | 4.02  | + | 4.24  | + | 3.46  |
| AKAP12   | Q02952 | + | 3.81 | + | -2.59 | + | 3.16  | + | 8.05  |
| AGRN     | O00468 | + | 3.81 | + | 4.79  | + | 1.01  | + | 4.90  |
| YBX1     | P67809 | + | 3.80 |   | 1.52  | + | 4.25  | + | 4.91  |
| LAMA4    | Q16363 | + | 3.78 | + | 6.63  | + | 6.60  |   | 0.38  |
| IGF2R    | P11717 | + | 3.73 | + | 4.63  | + | 3.83  | + | 3.14  |
| SRP14    | P37108 | + | 3.69 |   | -0.21 | + | 2.93  | + | 6.48  |
| EMILIN2  | Q9BXX0 | + | 3.68 | + | 8.11  | + | 5.24  |   | 0.08  |
| TGFBI    | Q15582 | + | 3.61 |   | -0.40 |   | 0.25  | + | 8.03  |
| SH3KBP1  | Q96B97 | + | 3.58 | + | 3.38  | + | 3.58  | + | 3.69  |
| NT5E     | P21589 | + | 3.57 | + | 1.48  | + | 4.72  | + | 4.14  |
| SDC1     | P18827 | + | 3.52 |   | 0.39  | + | 4.22  | + | 4.97  |
| SLC16A3  | O15427 | + | 3.48 | + | 4.88  |   | -0.03 | + | 4.74  |
| SLC1A5   | Q15758 | + | 3.46 | + | 4.07  | + | 4.14  | + | 2.70  |
| SLC43A3  | Q8NBI5 | + | 3.46 | + | 4.34  | + | 4.17  | + | 2.50  |
| GPRC5A   | Q8NFJ5 | + | 3.45 | + | 3.98  |   | -0.76 | + | 5.66  |
| CDH2     | P19022 | + | 3.41 | + | 3.10  | + | 3.63  | + | 3.47  |
| PXDN     | Q92626 | + | 3.38 |   | -0.34 |   | 0.02  | + | 7.62  |
| HLA-A    | P30453 | + | 3.36 |   | -0.09 |   | 0.08  | + | 7.41  |
| NRP1     | O14786 | + | 3.36 |   | 0.54  |   | 0.18  | + | 6.96  |
| PTPRG    | P23470 | + | 3.35 | + | 5.26  | + | 4.65  | + | 1.43  |
| LDLR     | P01130 | + | 3.31 |   | 0.38  |   | 1.59  | + | 6.09  |
| ITGA3    | P26006 | + | 3.26 |   | 1.89  |   | -0.26 | + | 6.20  |

|          |        |   |             |   |       |   |       |   |       |
|----------|--------|---|-------------|---|-------|---|-------|---|-------|
| ENPP1    | P22413 | + | <b>3.23</b> | + | 5.82  | + | 6.52  |   | -0.29 |
| HLA-DRB3 | P79483 | + | <b>3.17</b> |   | 0.13  |   | 0.14  | + | 6.81  |
| TSPAN4   | O14817 | + | <b>3.15</b> | + | 4.80  | + | 3.38  | + | 2.02  |
| SIRPA    | P78324 | + | <b>3.14</b> | + | 5.57  | + | 7.56  |   | -0.96 |
| TOM1L1   | O75674 | + | <b>3.13</b> | + | 4.37  | + | 3.86  | + | 1.95  |
| NRP2     | O60462 | + | <b>3.12</b> |   | 0.29  | + | 4.30  | + | 4.11  |
| ITGB1    | P05556 | + | <b>3.09</b> | + | 2.42  | + | 2.00  | + | 4.15  |
| CD109    | Q6YHK3 | + | <b>3.08</b> | + | 2.58  | + | 4.18  | + | 2.72  |
| LOXL2    | Q9Y4K0 | + | <b>3.07</b> |   | 1.05  |   | -0.16 | + | 6.21  |
| CEP55    | Q53EZ4 | + | <b>3.04</b> | + | 4.50  | + | 2.52  | + | 2.48  |
| HIST1H1E | P10412 | + | <b>3.04</b> |   | 1.04  |   | 0.42  | + | 5.81  |
| PAPPA    | Q13219 | + | <b>3.03</b> |   | 0.68  |   | 1.01  | + | 5.66  |
| FAM234A  | Q9H0X4 | + | <b>3.02</b> | + | 3.51  | + | 2.95  | + | 2.78  |
| ITCH     | Q96J02 | + | <b>3.02</b> | + | 2.42  | + | 2.32  | + | 3.79  |
| NOTCH2   | Q04721 | + | <b>2.99</b> | + | 3.24  | + | 5.08  | + | 1.60  |
| PRSS3P2  | Q8NHM4 | + | <b>2.97</b> |   | 2.52  |   | 1.03  | + | 4.41  |
| LAMC1    | P11047 | + | <b>2.96</b> | + | 6.10  | + | 5.06  |   | -0.19 |
| HLA-DPA1 | P20036 | + | <b>2.93</b> |   | 0.44  |   | -0.58 | + | 6.52  |
| PTX3     | P26022 | + | <b>2.90</b> |   | -0.10 |   | 0.01  | + | 6.44  |
| MYO1B    | O43795 | + | <b>2.89</b> | + | 3.33  | + | 4.45  |   | 1.68  |
| IL1RAP   | Q9NPH3 | + | <b>2.88</b> | + | 4.09  | + | 3.40  | + | 1.84  |
| LSAMP    | Q13449 | + | <b>2.88</b> | + | 2.40  | + | 1.07  | + | 4.24  |
| GRB2     | P62993 | + | <b>2.87</b> | + | 2.21  | + | 2.72  | + | 3.35  |
| MPZL1    | O95297 | + | <b>2.85</b> | + | 4.59  | + | 3.45  | + | 1.44  |
| L1CAM    | P32004 | + | <b>2.84</b> | + | 3.79  | + | 3.34  | + | 1.96  |
| SLC12A2  | P55011 | + | <b>2.83</b> | + | 4.67  | + | 4.24  |   | 0.89  |
| LAMB1    | P07942 | + | <b>2.82</b> | + | 5.82  | + | 5.29  |   | -0.46 |
| ADAM9    | Q13443 | + | <b>2.81</b> | + | 3.12  | + | 2.49  | + | 2.82  |
| KIRREL1  | Q96J84 | + | <b>2.79</b> |   | 1.93  | + | 4.49  | + | 2.29  |
| VPS37B   | Q9H9H4 | + | <b>2.79</b> | + | 2.94  | + | 2.97  | + | 2.59  |
| CHMP5    | Q9NZZ3 | + | <b>2.79</b> | + | 4.79  | + | 4.11  |   | 0.80  |
| MITD1    | Q8WV92 | + | <b>2.78</b> | + | 4.49  | + | 3.73  |   | 1.20  |
| COTL1    | Q14019 | + | <b>2.78</b> | + | 3.02  | + | 3.52  | + | 2.20  |
| PTK7     | Q13308 | + | <b>2.76</b> | + | 2.71  | + | 3.69  | + | 2.24  |
| IMPDH2   | P12268 | + | <b>2.75</b> | + | 2.21  | + | 1.67  | + | 3.71  |

|         |        |   |      |   |       |   |       |   |       |
|---------|--------|---|------|---|-------|---|-------|---|-------|
| CHMP4B  | Q9H444 | + | 2.71 | + | 4.52  | + | 3.66  |   | 1.04  |
| PTPRJ   | Q12913 | + | 2.70 | + | 3.95  | + | 4.28  |   | 1.01  |
| MVB12B  | Q9H7P6 | + | 2.70 | + | 4.30  |   | -0.03 | + | 3.38  |
| CD63    | P08962 | + | 2.69 | + | 3.82  | + | 3.54  |   | 1.50  |
| ALB     | P02768 |   | 2.68 |   | 0.30  | + | 11.46 |   | -1.16 |
| CHMP4A  | Q9BY43 | + | 2.68 | + | 3.81  | + | 2.37  | + | 2.19  |
| DMBT1   | Q9UGM3 | + | 2.63 | + | 2.40  |   | 0.72  | + | 3.93  |
| PRNP    | P04156 | + | 2.60 |   | -0.36 | + | 6.72  | + | 1.90  |
| SLC5A6  | Q9Y289 | + | 2.58 | + | 2.93  | + | 3.50  | + | 1.82  |
| CD97    | P48960 | + | 2.58 |   | 1.42  | + | 3.13  | + | 2.95  |
| MVB12A  | Q96EY5 | + | 2.57 | + | 2.74  | + | 2.68  | + | 2.41  |
| PTPN23  | Q9H3S7 | + | 2.56 | + | 3.50  | + | 2.24  | + | 2.20  |
| HLA-A   | P16190 | + | 2.56 |   | 0.22  |   | -0.37 | + | 5.72  |
| TENM3   | Q9P273 | + | 2.54 | + | 2.14  | + | 2.77  | + | 2.64  |
| PLAT    | P00750 | + | 2.53 | + | 2.87  | + | 1.97  | + | 2.67  |
| SNAP23  | O00161 | + | 2.52 | + | 3.86  | + | 2.91  |   | 1.47  |
| SFRP1   | Q8N474 | + | 2.51 |   | 0.11  | + | 2.49  | + | 3.96  |
| VPS28   | Q9UK41 | + | 2.51 | + | 3.01  | + | 2.42  | + | 2.26  |
| ITGB5   | P18084 | + | 2.46 |   | 1.18  | + | 3.21  | + | 2.79  |
| PROCR   | Q9UNN8 | + | 2.45 |   | -0.55 | + | 4.07  | + | 3.29  |
| SVIP    | Q8NHG7 | + | 2.44 | + | 1.45  | + | 2.98  | + | 2.72  |
| ROR1    | Q01973 | + | 2.44 | + | 5.04  | + | 3.49  |   | 0.25  |
| AFP     | P02771 | + | 2.43 | + | 3.21  |   | 0.42  | + | 3.16  |
| JCHAIN  | P01591 | + | 2.42 | + | 1.89  | + | 1.76  | + | 3.14  |
| CD46    | P15529 | + | 2.42 | + | 2.44  | + | 2.02  | + | 2.65  |
| GPC1    | P35052 | + | 2.41 |   | 0.29  | + | 3.12  | + | 3.26  |
| TPT1    | P13693 | + | 2.37 |   | 2.42  |   | 2.46  | + | 2.28  |
| GNG12   | Q9UBI6 | + | 2.36 | + | 2.40  | + | 2.48  | + | 2.26  |
| PABPC4  | Q13310 | + | 2.35 | + | -1.92 | + | 2.46  | + | 4.85  |
| ALDH1A3 | P47895 | + | 2.33 |   | -0.06 | + | 2.25  | + | 3.81  |
| SERINC3 | Q13530 | + | 2.32 | + | 3.92  | + | 1.99  |   | 1.56  |
| SLC26A2 | P50443 | + | 2.32 | + | 4.17  | + | 3.39  |   | 0.56  |
| JAM3    | Q9BX67 | + | 2.31 | + | 1.74  | + | 3.38  | + | 2.02  |
| ANPEP   | P15144 | + | 2.31 |   | 0.27  |   | 0.17  | + | 4.82  |

|         |        |   |             |   |       |   |       |   |       |
|---------|--------|---|-------------|---|-------|---|-------|---|-------|
| PTPRF   | P10586 | + | <b>2.30</b> |   | 1.33  | + | 2.50  | + | 2.77  |
| CPNE1   | Q99829 | + | <b>2.28</b> | + | 2.62  | + | 2.88  | + | 1.73  |
| FZD7    | O75084 | + | <b>2.28</b> | + | 4.48  | + | 3.46  |   | 0.25  |
| TUBA1C  | Q9BQE3 | + | <b>2.27</b> |   | 1.26  | + | 3.14  | + | 2.36  |
| PSCA    | O43653 | + | <b>2.27</b> | + | 5.12  | + | 2.94  |   | 0.15  |
| RRAS2   | P62070 | + | <b>2.26</b> | + | 1.60  | + | 2.33  | + | 2.62  |
| CHMP2B  | Q9UQN3 | + | <b>2.26</b> | + | 4.88  | + | 3.45  |   | -0.02 |
| MYO1E   | Q12965 | + | <b>2.25</b> | + | 1.76  | + | 2.19  | + | 2.59  |
| LHFPL2  | Q6ZUX7 | + | <b>2.25</b> | + | 2.49  | + | 2.15  | + | 2.16  |
| CEACAM1 | P13688 |   | 2.25        | + | 5.10  | + | 6.13  | + | -1.80 |
| MIF     | P14174 | + | <b>2.23</b> | + | 3.50  | + | 3.34  |   | 0.80  |
| EPHA3   | P29320 | + | <b>2.23</b> | + | 6.67  | + | 2.71  |   | -0.72 |
| ECM1    | Q16610 | + | <b>2.22</b> | + | 5.02  | + | 2.96  |   | 0.10  |
| F11R    | Q9Y624 | + | <b>2.22</b> | + | 4.05  | + | 4.17  |   | -0.06 |
| CD276   | Q5ZPR3 | + | <b>2.20</b> | + | 2.61  | + | 2.68  | + | 1.66  |
| CDH13   | P55290 |   | 2.19        |   | 0.16  | + | -1.78 | + | 5.79  |
| COL18A1 | P39060 | + | <b>2.18</b> |   | -0.23 |   | -0.17 | + | 5.03  |
| RALA    | P11233 | + | <b>2.16</b> | + | 2.51  | + | 2.17  | + | 1.95  |
| GJA1    | P17302 | + | <b>2.16</b> |   | -0.15 |   | -0.81 | + | 5.33  |
| GNAI3   | P08754 | + | <b>2.16</b> | + | 2.62  | + | 2.93  | + | 1.42  |
| GYPC    | P04921 |   | 2.12        | + | 4.86  | + | 5.38  |   | -1.47 |
| CHMP2A  | O43633 | + | <b>2.11</b> | + | 2.89  | + | 3.05  |   | 1.08  |
| SEMA7A  | O75326 | + | <b>2.10</b> |   | -0.03 |   | 0.32  | + | 4.45  |
| RAP2C   | Q9Y3L5 | + | <b>2.10</b> | + | 3.54  | + | 1.99  | + | 1.30  |
| ZDHHC5  | Q9C0B5 | + | <b>2.10</b> |   | 1.83  |   | 2.28  | + | 2.15  |
| CLDND1  | Q9NY35 | + | <b>2.07</b> | + | 2.22  | + | 2.02  | + | 2.01  |
| DNAJC7  | Q99615 | + | <b>2.07</b> | + | 4.17  | + | 2.39  |   | 0.61  |
| SCRIB   | Q14160 | + | <b>2.06</b> | + | 3.35  | + | 2.67  |   | 0.92  |
| GIPC1   | O14908 | + | <b>2.05</b> | + | 2.72  | + | 3.94  |   | 0.51  |
| SLC5A3  | P53794 | + | <b>2.02</b> | + | 6.43  |   | 0.16  |   | 0.49  |
| SLC4A7  | Q9Y6M7 | + | <b>2.01</b> | + | 2.56  | + | 2.49  |   | 1.38  |
| CHMP1A  | Q9HD42 | + | <b>2.00</b> | + | 5.72  | + | 1.00  |   | 0.36  |
| NRAS    | P01111 | + | <b>2.00</b> |   | 2.14  | + | 2.67  |   | 1.51  |
| NTM     | Q9P121 | + | <b>1.99</b> |   | 0.40  |   | 0.42  | + | 3.89  |
| KPNA2   | P52292 | + | <b>1.99</b> | + | 2.77  | + | 1.99  | + | 1.52  |

|              |        |   |      |   |       |   |       |   |       |
|--------------|--------|---|------|---|-------|---|-------|---|-------|
| CPNE3        | O75131 | + | 1.96 | + | 3.45  | + | 2.93  |   | 0.49  |
| MARCKSL<br>1 | P49006 | + | 1.96 | + | 2.45  | + | 2.53  | + | 1.32  |
| RRM1         | P23921 | + | 1.95 | + | 1.92  |   | -0.08 | + | 3.19  |
| GNB4         | Q9HAV0 | + | 1.94 |   | 1.57  |   | 1.81  | + | 2.24  |
| TSG101       | Q99816 | + | 1.94 | + | 2.09  |   | 1.59  | + | 2.06  |
| ITGA5        | P08648 |   | 1.94 |   | 0.44  |   | -1.92 | + | 5.15  |
| TSPAN14      | Q8NG11 | + | 1.93 | + | 3.26  | + | 1.89  | + | 1.16  |
| CTHRC1       | Q96CG8 | + | 1.93 | + | 3.97  | + | 2.53  |   | 0.34  |
| PRSS23       | O95084 | + | 1.92 |   | 0.62  |   | 0.75  | + | 3.40  |
| DLG1         | Q12959 | + | 1.91 |   | 2.02  | + | 2.57  |   | 1.45  |
| ITGB8        | P26012 | + | 1.91 |   | -0.56 | + | 2.72  | + | 2.90  |
| SLC7A1       | P30825 | + | 1.90 | + | 3.88  |   | 1.44  |   | 1.00  |
| DAG1         | Q14118 | + | 1.90 |   | 1.35  | + | 3.45  |   | 1.29  |
| UBTD1        | Q9HAC8 | + | 1.89 | + | 3.23  | + | 2.62  |   | 0.65  |
| LSR          | Q86X29 | + | 1.88 | + | 5.34  | + | 1.24  |   | 0.19  |
| PPFIBP1      | Q86W92 | + | 1.88 | + | 1.89  | + | 4.76  |   | 0.14  |
| RALB         | P11234 | + | 1.87 | + | 2.80  | + | 2.46  |   | 0.96  |
| ITGAV        | P06756 | + | 1.85 | + | 1.90  | + | 2.82  | + | 1.23  |
| TSPAN3       | O60637 | + | 1.84 | + | 2.54  | + | 4.26  |   | -0.02 |
| SNX33        | Q8WV41 | + | 1.84 |   | 0.19  |   | -0.01 | + | 3.94  |
| BAG5         | Q9UL15 | + | 1.83 | + | 4.19  | + | 2.46  |   | 0.04  |
| HIST1H2AJ    | Q99878 | + | 1.82 |   | 1.77  |   | 0.57  | + | 2.60  |
| DIP2A        | Q14689 | + | 1.81 | + | 3.59  | + | 1.39  | + | 1.00  |
| PLEKHB2      | Q96CS7 | + | 1.81 | + | 3.48  | + | 3.24  |   | -0.05 |
| LY6E         | Q16553 |   | 1.80 | + | 5.14  |   | 2.91  |   | -0.86 |
| PLSCR3       | Q9NRY6 | + | 1.80 | + | 2.30  |   | -0.28 | + | 2.75  |
| FKBP1A       | P62942 | + | 1.80 |   | 1.75  |   | 2.63  |   | 1.33  |
| DCBLD2       | Q96PD2 | + | 1.79 | + | -1.37 |   | 0.55  | + | 4.44  |
| ITGB3        | P05106 | + | 1.78 | + | 2.53  | + | 2.39  | + | 0.96  |
| APOH         | P02749 | + | 1.77 | + | 1.91  |   | 0.28  | + | 2.58  |
| TG           | P01266 | + | 1.74 | + | 2.14  |   | -0.50 | + | 2.85  |
| ADGRG1       | Q9Y653 | + | 1.74 | + | 3.18  | + | 3.25  |   | -0.04 |
| HIST1H1B     | P16401 |   | 1.74 |   | -0.25 |   | -0.10 | + | 4.04  |
| STK10        | O94804 | + | 1.73 |   | 1.73  | + | 3.19  |   | 0.86  |

|         |            |   |      |   |       |   |       |   |       |
|---------|------------|---|------|---|-------|---|-------|---|-------|
| CNP     | P09543     | + | 1.73 | + | 2.41  | + | 2.76  |   | 0.71  |
| ITGA1   | P56199     | + | 1.71 |   | 1.14  | + | 3.63  |   | 0.90  |
| RAB35   | Q15286     | + | 1.71 | + | 1.45  | + | 1.52  | + | 1.98  |
| SLC2A3  | P11169     | + | 1.71 | + | 3.87  | + | 1.55  |   | 0.51  |
| H2AFV   | Q71UI9     | + | 1.67 | + | 2.38  |   | 0.94  |   | 1.67  |
| IGF2BP2 | Q9Y6M1     | + | 1.67 |   | -0.32 |   | 0.92  | + | 3.30  |
| KRT6A   | P02538     | + | 1.66 |   | 0.79  |   | 2.51  |   | 1.68  |
| SRP9    | P49458     | + | 1.66 |   | 0.38  |   | -0.44 | + | 3.70  |
| ZC3HAV1 | Q7Z2W4     | + | 1.66 | + | 1.30  | + | 1.71  | + | 1.86  |
| CAD     | P27708     | + | 1.66 | + | 2.60  | + | 1.48  | + | 1.21  |
| TAOK1   | Q7L7X3     | + | 1.64 | + | 1.86  | + | 1.90  | + | 1.34  |
| PDCD6IP | Q8WUM<br>4 | + | 1.63 | + | 2.86  | + | 1.55  | + | 0.94  |
| NECTIN3 | Q9NQS3     | + | 1.63 |   | 0.08  |   | -0.61 | + | 3.90  |
| PRKG2   | Q13237     | + | 1.63 | + | 3.38  | + | 2.41  |   | 0.10  |
| FASN    | P49327     | + | 1.62 | + | 2.28  | + | 1.55  | + | 1.26  |
| CLTA    | P09496     | + | 1.60 | + | 2.02  | + | 2.26  |   | 0.96  |
| GPRC5B  | Q9NZH0     | + | 1.60 | + | 2.02  | + | 2.68  |   | 0.71  |
| DSG2    | Q14126     | + | 1.59 |   | 0.07  | + | 3.11  | + | 1.59  |
| SLC29A1 | Q99808     | + | 1.57 | + | 1.96  | + | 1.75  | + | 1.22  |
| HTRA1   | Q92743     | + | 1.56 | + | 1.99  | + | 0.63  | + | 1.87  |
| HLA-A   | P13746     | + | 1.56 |   | 0.92  | + | 2.28  | + | 1.52  |
| CPM     | P14384     | + | 1.56 | + | 2.26  | + | 3.88  |   | -0.25 |
| SLC20A1 | Q8WUM<br>9 | + | 1.56 | + | 2.32  | + | 2.20  |   | 0.72  |
| GAPDH   | P04406     | + | 1.56 | + | 2.05  | + | 1.53  | + | 1.28  |
| HLA-C   | P10321     | + | 1.56 | + | 3.03  | + | 1.25  |   | 0.86  |
| RAB13   | P51153     | + | 1.54 | + | 2.21  |   | 0.91  | + | 1.52  |
| ANXA11  | P50995     | + | 1.54 | + | 2.40  | + | 2.06  | + | 0.70  |
| YES1    | P07947     | + | 1.53 |   | 1.37  | + | 2.92  |   | 0.79  |
| MMP14   | P50281     | + | 1.52 |   | 1.21  |   | 1.51  | + | 1.72  |
| B2M     | P61769     | + | 1.51 |   | 1.36  | + | 2.18  |   | 1.19  |
| PLXNA1  | Q9UIW2     | + | 1.50 |   | 1.98  |   | 2.11  |   | 0.85  |
| SLC6A8  | P48029     | + | 1.48 | + | 2.76  | + | 2.78  |   | -0.07 |
| FABP5   | Q01469     |   | 1.47 |   | 2.83  |   | 3.53  |   | -0.58 |
| RHOG    | P84095     | + | 1.47 |   | 1.03  | + | 1.53  | + | 1.70  |

|               |            |   |      |   |       |   |       |   |       |
|---------------|------------|---|------|---|-------|---|-------|---|-------|
| ADAM10        | O14672     | + | 1.47 | + | 2.68  | + | 1.30  | + | 0.84  |
| TUBA4A        | P68366     | + | 1.47 | + | 2.16  |   | -0.74 | + | 2.38  |
| NME2          | P22392     | + | 1.47 |   | 1.75  | + | 2.41  |   | 0.73  |
| UEVLD         | Q8IX04     |   | 1.46 | + | 3.22  | + | 3.50  |   | -0.82 |
| KRAS          | P01116     | + | 1.45 |   | 1.43  |   | 1.63  |   | 1.36  |
| HIST2H2B<br>E | Q16778     | + | 1.45 |   | 1.37  |   | 0.35  | + | 2.15  |
| RAP2A         | P10114     | + | 1.44 | + | 3.38  | + | 2.08  |   | -0.11 |
| TBC1D10A      | Q9BXI6     | + | 1.43 | + | 3.84  | + | 2.00  |   | -0.35 |
| DNAJA2        | O60884     | + | 1.43 | + | 3.33  | + | 1.52  |   | 0.23  |
| NEDD4         | P46934     | + | 1.42 | + | 2.12  |   | 0.87  | + | 1.33  |
| MME           | P08473     |   | 1.40 |   | 1.03  | + | 3.23  |   | 0.52  |
| UBE2V2        | Q15819     | + | 1.38 | + | 2.40  | + | 2.22  |   | 0.28  |
| ATXN2L        | Q8WWM<br>7 | + | 1.37 |   | 0.08  |   | -0.66 | + | 3.35  |
| ILF3          | Q12906     |   | 1.36 |   | -0.65 |   | -0.09 | + | 3.43  |
| ARF1          | P84077     | + | 1.34 | + | 2.60  |   | 0.02  | + | 1.38  |
| ACSL3         | O95573     | + | 1.34 | + | 2.46  |   | 0.68  | + | 1.06  |
| RAC1          | P63000     | + | 1.33 | + | 1.35  | + | 1.18  | + | 1.42  |
| RAP1B         | P61224     | + | 1.33 |   | 0.94  |   | 1.77  |   | 1.31  |
| SLC2A1        | P11166     | + | 1.33 |   | 0.40  | + | 0.99  | + | 2.10  |
| ENG           | P17813     | + | 1.33 |   | 0.84  | + | 2.11  |   | 1.15  |
| CD81          | P60033     | + | 1.33 | + | 2.24  | + | 2.15  |   | 0.28  |
| LRP1          | Q07954     | + | 1.33 |   | 1.21  |   | -0.89 | + | 2.72  |
| MARCKS        | P29966     | + | 1.32 |   | 0.73  | + | 2.04  | + | 1.25  |
| MOV10         | Q9HCE1     | + | 1.32 |   | -0.53 | + | 2.41  | + | 1.79  |
| CSF2RA        | P15509     | + | 1.31 | + | 2.96  | + | 1.06  |   | 0.47  |
| FAT1          | Q14517     | + | 1.31 | + | 2.26  | + | 2.70  |   | -0.09 |
| SLC38A2       | Q96QD8     |   | 1.30 |   | 2.14  |   | 2.45  |   | 0.12  |
| ACSL4         | O60488     | + | 1.30 |   | 0.68  | + | 1.88  | + | 1.33  |
| SYPL1         | Q16563     |   | 1.30 |   | 1.59  | + | 3.81  |   | -0.38 |
| STAMBP        | O95630     |   | 1.29 | + | 3.48  | + | 2.32  |   | -0.63 |
| MPP6          | Q9NZW5     | + | 1.29 |   | 1.48  | + | 2.04  |   | 0.73  |
| IGF1R         | P08069     | + | 1.28 | + | 1.59  | + | 2.78  |   | 0.20  |
| FGG           | P02679     |   | 1.27 |   | 1.25  |   | -0.86 | + | 2.56  |
| CD59          | P13987     | + | 1.27 |   | 0.74  | + | 1.50  | + | 1.45  |



|          |        |   |      |   |       |   |       |   |       |
|----------|--------|---|------|---|-------|---|-------|---|-------|
| ABI1     | Q8IZP0 |   | 1.27 |   | 0.23  |   | 0.89  | + | 2.13  |
| TBCA     | O75347 | + | 1.27 | + | 1.99  | + | 2.65  |   | 0.01  |
| PCBP2    | Q15366 | + | 1.27 | + | -0.83 | + | 0.60  | + | 2.93  |
| RAB22A   | Q9UL26 | + | 1.26 |   | 1.35  |   | 1.52  |   | 1.06  |
| BROX     | Q5VW32 | + | 1.26 | + | 2.04  |   | 1.23  |   | 0.82  |
| BASP1    | P80723 |   | 1.26 |   | -2.36 |   | -1.23 | + | 4.92  |
| SDCBP    | O00560 | + | 1.25 | + | 3.11  | + | 2.05  |   | -0.34 |
| DNAJA1   | P31689 | + | 1.25 | + | 3.14  | + | 1.44  |   | 0.01  |
| GART     | P22102 | + | 1.24 |   | 1.23  |   | 1.36  |   | 1.17  |
| KIF23    | Q02241 |   | 1.24 | + | 2.79  | + | 2.38  |   | -0.38 |
| PLXNB2   | O15031 |   | 1.23 |   | 1.25  |   | 1.27  |   | 1.18  |
| DDX3X    | O00571 | + | 1.22 |   | 0.53  |   | 1.26  | + | 1.61  |
| VPS4A    | Q9UN37 | + | 1.22 | + | 2.75  | + | 1.71  |   | 0.01  |
| CHMP1B   | Q7LBR1 |   | 1.22 | + | 2.76  | + | 3.33  |   | -0.97 |
| GLO1     | Q04760 | + | 1.21 |   | 0.48  |   | 1.84  |   | 1.28  |
| CPSF6    | Q16630 |   | 1.20 |   | -0.42 |   | -0.26 | + | 3.05  |
| ADGRG6   | Q86SQ4 | + | 1.20 | + | 2.10  | + | 2.63  |   | -0.20 |
| ANO6     | Q4KMQ2 | + | 1.20 |   | 0.73  | + | 2.45  |   | 0.73  |
| ULBP3    | Q9BZM4 | + | 1.19 |   | 0.44  |   | -0.23 | + | 2.50  |
| PDCD6    | O75340 | + | 1.19 | + | 1.35  | + | 1.33  | + | 1.02  |
| ENO1     | P06733 | + | 1.19 | + | 1.35  | + | 2.68  |   | 0.20  |
| ALCAM    | Q13740 |   | 1.19 |   | -2.54 |   | -0.11 | + | 4.21  |
| RELL1    | Q8IUW5 | + | 1.19 | + | 2.63  | + | 2.26  |   | -0.32 |
| PITPNB   | P48739 | + | 1.18 | + | 1.80  | + | 2.09  |   | 0.26  |
| TUBB6    | Q9BUF5 |   | 1.18 |   | -0.88 |   | 1.23  | + | 2.38  |
| TRIP10   | Q15642 |   | 1.18 | + | -1.27 |   | -0.09 | + | 3.40  |
| SLC39A10 | Q9ULF5 | + | 1.17 |   | -0.01 | + | 1.89  | + | 1.45  |
| NAP1L1   | P55209 | + | 1.16 |   | 0.53  |   | 1.28  | + | 1.47  |
| ST13     | P50502 | + | 1.15 | + | 3.47  | + | 1.71  | + | -0.57 |
| NCSTN    | Q92542 |   | 1.14 |   | 1.04  |   | 2.10  |   | 0.63  |
| RAB34    | Q9BZG1 | + | 1.14 |   | 1.30  |   | 0.18  | + | 1.61  |
| MFGE8    | Q08431 | + | 1.13 | + | 1.24  | + | 2.32  |   | 0.36  |
| PICALM   | Q13492 | + | 1.12 | + | 2.51  | + | 1.81  |   | -0.12 |
| SERINC5  | Q86VE9 |   | 1.12 | + | 3.71  | + | 3.16  | + | -1.66 |
| TRPV4    | Q9HBA0 |   | 1.12 | + | 0.95  | + | 4.09  |   | -0.56 |

|               |        |   |      |   |       |   |       |   |       |
|---------------|--------|---|------|---|-------|---|-------|---|-------|
| EVA1A         | Q9H8M9 |   | 1.11 | + | 3.54  | + | 3.44  | + | -1.75 |
| HSP90AB2<br>P | Q58FF8 |   | 1.11 |   | 0.51  |   | 1.96  |   | 0.95  |
| VTA1          | Q9NP79 |   | 1.11 | + | 3.36  | + | 2.62  |   | -1.15 |
| SLC6A6        | P31641 | + | 1.11 |   | 0.99  | + | 1.48  |   | 0.95  |
| BANF1         | O75531 |   | 1.10 | + | 1.86  |   | -0.78 |   | 1.78  |
| TAOK3         | Q9H2K8 | + | 1.10 |   | 0.18  | + | 3.21  |   | 0.38  |
| CD99          | P14209 |   | 1.09 | + | 2.35  | + | 2.98  |   | -0.79 |
| ANXA2         | P07355 | + | 1.09 |   | 0.59  | + | 1.60  | + | 1.09  |
| STUB1         | Q9UNE7 |   | 1.09 | + | 2.74  |   | 1.06  |   | 0.11  |
| EEF1B2        | P24534 |   | 1.08 |   | 0.91  | + | 2.63  |   | 0.25  |
| ARF4          | P18085 | + | 1.07 |   | 0.65  |   | 0.50  | + | 1.65  |
| CXADR         | P78310 | + | 1.06 | + | 2.28  |   | 0.25  |   | 0.83  |
| CFL2          | Q9Y281 | + | 1.06 |   | 1.25  |   | 1.15  |   | 0.90  |
| MAGED2        | Q9UNF1 | + | 1.06 | + | 1.40  | + | 1.93  |   | 0.34  |
| MYL12A        | P19105 |   | 1.06 |   | 1.00  | + | 2.12  |   | 0.45  |
| TSPAN9        | O75954 |   | 1.06 | + | 5.05  | + | 2.11  | + | -1.97 |
| INCENP        | Q9NQS7 | + | 1.06 | + | 2.72  | + | 1.14  |   | 0.01  |
| CD44          | P16070 | + | 1.05 |   | 0.64  | + | 1.75  |   | 0.88  |
| CD2AP         | Q9Y5K6 | + | 1.03 |   | 1.48  |   | 1.50  |   | 0.49  |
| VPS4B         | O75351 | + | 1.03 | + | 1.36  | + | 1.94  |   | 0.28  |
| MDK           | P21741 |   | 1.03 |   | -0.41 |   | -0.32 | + | 2.70  |
| IGSF8         | Q969P0 |   | 1.02 | + | 3.22  | + | 1.85  | + | -0.80 |
| ZYX           | Q15942 | + | 1.02 |   | 0.07  | + | 1.01  | + | 1.59  |
| UBA52         | P62987 | + | 1.01 | + | 1.73  |   | 0.95  |   | 0.61  |
| CTTN          | Q14247 |   | 1.00 | + | 2.85  |   | 0.87  |   | -0.03 |
| RANBP1        | P43487 |   | 1.00 |   | 1.34  |   | 1.92  |   | 0.23  |
| DAAM2         | Q86T65 |   | 1.00 |   | 0.99  | + | 2.36  |   | 0.18  |
| SRC           | P12931 | + | 0.99 |   | 0.20  | + | 1.61  | + | 1.10  |
| LIN7C         | Q9NUP9 | + | 0.99 | + | 1.80  | + | 1.89  |   | -0.03 |
| CALM          | P62158 | + | 0.99 |   | 1.18  |   | 1.70  |   | 0.44  |
| ATRN          | O75882 |   | 0.98 | + | 2.24  | + | 2.46  |   | -0.66 |
| TUBB8         | Q3ZCM7 |   | 0.97 |   | 1.16  |   | 1.59  |   | 0.48  |
| CD47          | Q08722 |   | 0.96 |   | 1.21  |   | 0.10  |   | 1.33  |
| PTTG1IP       | P53801 |   | 0.96 |   | 1.90  |   | 1.86  |   | -0.15 |

|          |        |   |      |   |       |   |       |   |       |
|----------|--------|---|------|---|-------|---|-------|---|-------|
| HEXB     | P07686 | + | 0.95 | + | 1.95  | + | 0.95  |   | 0.35  |
| DOCK10   | Q96BY6 |   | 0.93 | + | 1.52  | + | 2.87  |   | -0.58 |
| PDIA4    | P13667 | + | 0.93 |   | 0.09  | + | 2.21  |   | 0.67  |
| NCKAP1   | Q9Y2A7 |   | 0.92 |   | 0.17  |   | 0.91  |   | 1.38  |
| ATP1B3   | P54709 |   | 0.91 |   | 1.41  | + | 2.10  |   | -0.10 |
| CHMP3    | Q9Y3E7 |   | 0.91 | + | 2.85  | + | 1.87  | + | -0.83 |
| CAB39    | Q9Y376 | + | 0.90 |   | 1.07  |   | 0.69  |   | 0.92  |
| ALDH16A1 | Q8IZ83 |   | 0.90 | + | 2.28  |   | 0.61  |   | 0.25  |
| CDC37    | Q16543 |   | 0.90 |   | 0.30  |   | 2.07  |   | 0.56  |
| NUDC     | Q9Y266 | + | 0.90 |   | 0.68  | + | 1.97  |   | 0.39  |
| PSMA4    | P25789 |   | 0.89 |   | 0.65  |   | 0.23  |   | 1.43  |
| COL12A1  | Q99715 |   | 0.89 | + | -1.81 | + | -1.75 | + | 4.10  |
| SNX9     | Q9Y5X1 |   | 0.88 |   | 1.03  |   | 1.64  |   | 0.34  |
| CNRIP1   | Q96F85 |   | 0.87 | + | 1.48  | + | 1.83  |   | -0.06 |
| SMS      | P52788 |   | 0.87 |   | 1.43  |   | 1.30  |   | 0.28  |
| CALU     | O43852 |   | 0.87 |   | 0.37  | + | 3.70  |   | -0.53 |
| SQSTM1   | Q13501 |   | 0.87 | + | 2.19  | + | 4.05  | + | -1.84 |
| STAM2    | O75886 |   | 0.87 | + | 2.30  |   | 0.92  |   | -0.03 |
| PRDX6    | P30041 |   | 0.86 |   | 1.00  | + | 2.28  |   | -0.07 |
| RPL23A   | P62750 |   | 0.86 |   | 0.27  | + | 2.00  |   | 0.54  |
| EHD4     | Q9H223 | + | 0.86 |   | 1.18  |   | 0.64  |   | 0.80  |
| SCAMP4   | Q969E2 |   | 0.85 | + | 2.84  |   | -1.44 |   | 1.04  |
| BAIAP2L1 | Q9UHR4 | + | 0.85 |   | 0.54  | + | 2.24  |   | 0.20  |
| APOB     | P04114 |   | 0.85 | + | -2.83 |   | 0.22  | + | 3.44  |
| MAPRE1   | Q15691 | + | 0.84 |   | 0.31  | + | 1.49  |   | 0.77  |
| ATP2B1   | P20020 |   | 0.84 |   | 1.29  |   | 1.21  |   | 0.34  |
| NPTN     | Q9Y639 | + | 0.83 |   | 0.75  | + | 1.48  |   | 0.49  |
| FLOT2    | Q14254 | + | 0.83 | + | 1.54  | + | 1.03  |   | 0.29  |
| SLC23A2  | Q9UGH3 |   | 0.83 | + | 2.20  | + | 3.33  |   | -1.50 |
| EIF5A    | P63241 |   | 0.82 |   | 1.16  |   | 1.42  |   | 0.26  |
| CACYBP   | Q9HB71 |   | 0.82 |   | 1.33  | + | 1.88  |   | -0.12 |
| OTUD7B   | Q6GQQ9 | + | 0.82 | + | 1.53  |   | 0.59  |   | 0.53  |
| S100B    | P04271 |   | 0.82 |   | 1.86  | + | 2.54  |   | -0.84 |
| ABCC1    | P33527 |   | 0.80 |   | 1.02  | + | 2.00  |   | -0.05 |

|          |        |   |      |   |       |   |       |   |       |
|----------|--------|---|------|---|-------|---|-------|---|-------|
| CDC42    | P60953 | + | 0.80 |   | 0.03  |   | 0.59  | + | 1.38  |
| SDC2     | P34741 | + | 0.80 | + | 1.53  | + | 1.83  |   | -0.27 |
| GLRX3    | O76003 |   | 0.79 |   | 0.67  | + | 2.15  |   | 0.04  |
| NCS1     | P62166 |   | 0.78 |   | -1.38 |   | 1.50  | + | 1.65  |
| LYN      | P07948 |   | 0.78 | + | 2.04  |   | 0.63  |   | 0.11  |
| S100A1   | P23297 |   | 0.77 | + | 1.71  |   | 1.07  |   | 0.03  |
| HNRNPL   | P14866 | + | 0.76 |   | 0.42  |   | -0.02 | + | 1.44  |
| ESYT1    | Q9BSJ8 |   | 0.76 | + | 1.66  | + | 1.47  |   | -0.22 |
| IGLL5    | B9A064 |   | 0.76 |   | -0.28 | + | 2.81  |   | 0.14  |
| GNB2     | P62879 | + | 0.75 |   | 0.82  | + | 1.50  |   | 0.27  |
| ABCC4    | O15439 |   | 0.75 |   | 0.82  | + | 1.87  |   | 0.04  |
| GNB1     | P62873 | + | 0.75 | + | 1.20  | + | 1.64  |   | -0.06 |
| KRT14    | P02533 |   | 0.75 |   | -0.08 |   | 1.09  |   | 1.04  |
| IST1     | P53990 |   | 0.74 | + | 2.18  |   | 1.77  |   | -0.75 |
| AHSG     | P02765 |   | 0.72 | + | 0.92  |   | -0.59 | + | 1.38  |
| STX4     | Q12846 |   | 0.72 |   | 1.18  | + | 2.16  |   | -0.42 |
| PEF1     | Q9UBV8 |   | 0.71 |   | 1.34  |   | 1.18  |   | 0.06  |
| EZR      | P15311 |   | 0.70 | + | 1.23  | + | 1.79  |   | -0.27 |
| ARF6     | P62330 | + | 0.70 |   | 1.15  |   | 1.02  |   | 0.24  |
| CC2D1B   | Q5T0F9 |   | 0.70 | + | 1.80  | + | 1.32  |   | -0.34 |
| FAM129B  | Q96TA1 |   | 0.70 |   | -0.08 |   | 1.06  |   | 0.95  |
| TMEM30A  | Q9NV96 |   | 0.70 |   | 1.05  | + | 1.72  |   | -0.13 |
| SLC7A11  | Q9UPY5 |   | 0.69 | + | 1.58  | + | 1.82  |   | -0.53 |
| BTN2A1   | Q7KYR7 |   | 0.69 |   | 0.97  | + | 2.43  |   | -0.53 |
| PI4KA    | P42356 |   | 0.68 |   | 1.22  |   | 1.67  |   | -0.24 |
| HSPA6    | P17066 |   | 0.68 | + | 2.35  | + | 1.64  | + | -0.90 |
| RPLP2    | P05387 |   | 0.68 |   | -0.36 |   | 0.79  | + | 1.23  |
| BLVRA    | P53004 |   | 0.67 |   | 0.75  | + | 1.89  |   | -0.11 |
| YKT6     | O15498 |   | 0.66 | + | 1.29  | + | 1.49  |   | -0.22 |
| MAP4K4   | O95819 | + | 0.66 | + | 1.65  |   | 0.70  |   | 0.04  |
| GNAI2    | P04899 | + | 0.65 |   | 0.34  | + | 0.51  | + | 0.92  |
| ANXA5    | P08758 |   | 0.65 | + | 2.10  | + | 1.86  | + | -0.94 |
| MSN      | P26038 |   | 0.65 |   | 1.15  | + | 1.54  |   | -0.18 |
| COMT     | P21964 |   | 0.65 | + | 1.36  |   | 0.63  |   | 0.23  |
| SLC9A3R1 | O14745 |   | 0.65 | + | 3.88  |   | 2.32  | + | -2.30 |

|          |        |   |      |   |       |   |       |   |       |
|----------|--------|---|------|---|-------|---|-------|---|-------|
| MYO1C    | O00159 |   | 0.64 | + | 1.69  |   | 0.84  |   | -0.10 |
| RHBDF1   | Q96CC6 |   | 0.62 | + | 2.71  |   | 1.50  |   | -1.17 |
| RAP1A    | P62834 | + | 0.62 | + | 0.82  | + | 1.02  |   | 0.26  |
| LAMP1    | P11279 |   | 0.61 |   | 0.85  | + | 2.34  |   | -0.56 |
| EPB41L2  | O43491 | + | 0.61 | + | 1.14  |   | 0.87  |   | 0.14  |
| RP2      | O75695 |   | 0.60 |   | 1.29  |   | 1.05  |   | -0.08 |
| PELI2    | Q9HAT8 |   | 0.60 | + | 1.86  |   | 0.43  |   | -0.05 |
| RHOC     | P08134 |   | 0.59 |   | 1.25  | + | 2.27  |   | -0.82 |
| SNTB1    | Q13884 |   | 0.59 | + | 2.45  | + | 1.80  |   | -1.26 |
| PTPRA    | P18433 |   | 0.58 | + | 1.18  | + | 1.51  |   | -0.33 |
| KRT9     | P35527 |   | 0.58 |   | -0.43 |   | 1.26  |   | 0.78  |
| PSMA2    | P25787 |   | 0.58 |   | 0.50  |   | -0.12 |   | 1.05  |
| FN1      | P02751 |   | 0.58 | + | 2.11  |   | 1.12  |   | -0.67 |
| ADK      | P55263 |   | 0.56 |   | 1.14  |   | -0.28 |   | 0.72  |
| ADAM17   | P78536 |   | 0.55 | + | 2.29  | + | 1.32  | + | -0.96 |
| ACTN4    | O43707 |   | 0.55 |   | -0.22 | + | 1.30  |   | 0.55  |
| IGSF3    | O75054 |   | 0.54 | + | 2.09  |   | 0.17  |   | -0.16 |
| KPNA4    | O00629 |   | 0.54 |   | -0.42 |   | 1.18  |   | 0.74  |
| HSPA8    | P11142 |   | 0.54 | + | 2.36  | + | 1.02  | + | -0.84 |
| CCDC50   | Q8IVM0 |   | 0.54 | + | 4.33  | + | 2.94  | + | -3.18 |
| GALK1    | P51570 |   | 0.53 |   | 1.29  |   | -0.80 |   | 0.86  |
| SORT1    | Q99523 |   | 0.53 | + | 2.49  |   | 1.47  |   | -1.22 |
| GAP43    | P17677 |   | 0.52 |   | -0.79 |   | 0.45  | + | 1.34  |
| ORAI1    | Q96D31 |   | 0.51 |   | 1.72  |   | -0.42 |   | 0.35  |
| HIST2H3A | Q71DI3 |   | 0.51 |   | 1.44  |   | -1.02 |   | 0.87  |
| KRT16    | P08779 |   | 0.49 |   | 1.64  |   | 1.43  |   | -0.76 |
| UBE2L3   | P68036 |   | 0.49 |   | 1.37  |   | 2.03  |   | -0.96 |
| RNH1     | P13489 |   | 0.49 |   | 0.23  |   | 2.05  |   | -0.29 |
| PITPNA   | Q00169 |   | 0.49 |   | 0.30  | + | 1.52  |   | -0.01 |
| STK24    | Q9Y6E0 |   | 0.48 |   | 0.42  |   | 1.46  |   | -0.06 |
| TXN      | P10599 |   | 0.48 |   | 0.22  |   | 1.11  |   | 0.27  |
| TAGLN2   | P37802 |   | 0.48 |   | -0.02 |   | -0.10 |   | 1.13  |
| CSNK1G2  | P78368 |   | 0.46 |   | 0.63  |   | 0.60  |   | 0.27  |
| WASL     | O00401 |   | 0.46 |   | -0.26 | + | 2.22  |   | -0.17 |
| STOM     | P27105 |   | 0.45 | + | 1.27  | + | 1.58  | + | -0.71 |

|         |        |   |      |   |       |   |       |   |       |
|---------|--------|---|------|---|-------|---|-------|---|-------|
| PRKDC   | P78527 |   | 0.44 |   | 0.60  |   | 0.30  |   | 0.44  |
| ARHGDI2 | P52565 |   | 0.44 |   | 0.52  |   | 0.66  |   | 0.27  |
| PSMA3   | P25788 |   | 0.44 |   | -0.82 |   | 0.28  |   | 1.29  |
| CAPN5   | O15484 |   | 0.43 | + | 3.66  | + | -1.87 |   | -0.12 |
| GPM6B   | Q13491 |   | 0.43 | + | 2.98  |   | 2.28  | + | -2.21 |
| F5      | P12259 |   | 0.42 |   | 0.35  | + | -1.83 | + | 1.81  |
| FAM126A | Q9BY13 |   | 0.42 |   | 0.87  |   | 0.69  |   | -0.02 |
| DNAJB1  | P25685 |   | 0.41 |   | 0.99  | + | 1.27  |   | -0.44 |
| CLIC1   | O00299 |   | 0.41 |   | 0.52  |   | 0.97  |   | 0.02  |
| H3F3A   | P84243 |   | 0.41 |   | -1.06 |   | 0.79  |   | 1.07  |
| CLIC4   | Q9Y696 |   | 0.41 | + | 1.07  | + | 2.12  | + | -1.01 |
| ACTN1   | P12814 |   | 0.41 |   | 0.43  |   | 0.85  |   | 0.13  |
| MINK1   | Q8N4C8 |   | 0.39 | + | 1.79  | + | 1.61  | + | -1.18 |
| EIF4A1  | P60842 | + | 0.38 |   | 0.38  | + | 0.73  |   | 0.18  |
| RHOA    | P61586 |   | 0.38 |   | 0.09  |   | 0.14  |   | 0.69  |
| RAP2B   | P61225 |   | 0.37 | + | 0.86  | + | 0.97  |   | -0.28 |
| C9      | P02748 |   | 0.37 |   | 0.51  |   | -1.29 |   | 1.28  |
| FAM49B  | Q9NUQ9 | + | 0.36 |   | 0.36  |   | 0.33  |   | 0.39  |
| UBASH3B | Q8TF42 |   | 0.35 | + | 1.27  |   | 0.62  |   | -0.36 |
| PA2G4   | Q9UQ80 |   | 0.35 |   | -0.24 |   | 1.25  |   | 0.16  |
| ADSL    | P30566 |   | 0.35 |   | 0.58  |   | -0.15 |   | 0.51  |
| EHD1    | Q9H4M9 |   | 0.35 |   | 0.36  |   | -0.33 |   | 0.74  |
| ENAH    | Q8N8S7 |   | 0.35 |   | 0.33  |   | 0.86  |   | 0.05  |
| H2AFY   | O75367 |   | 0.34 |   | 0.24  |   | -0.96 |   | 1.19  |
| RTN4    | Q9NQC3 |   | 0.33 | + | -1.39 | + | 1.17  |   | 0.87  |
| EIF6    | P56537 |   | 0.31 |   | -0.39 |   | 1.12  |   | 0.25  |
| CYFIP1  | Q7L576 |   | 0.31 |   | -0.09 |   | -0.17 |   | 0.85  |
| PCDHGC3 | Q9UN70 |   | 0.30 |   | -0.74 |   | 0.86  |   | 0.59  |
| ROBO1   | Q9Y6N7 |   | 0.30 | + | 1.72  |   | 0.06  |   | -0.41 |
| ECE1    | P42892 |   | 0.30 |   | -0.26 |   | -0.38 |   | 1.04  |
| KRT1    | P04264 |   | 0.30 |   | -0.51 |   | 0.69  |   | 0.54  |
| SCARB1  | Q8WTV0 |   | 0.29 |   | 1.21  | + | 2.00  |   | -1.28 |
| CALR    | P27797 |   | 0.29 | + | -1.36 | + | 0.94  | + | 0.90  |
| MPP1    | Q00013 |   | 0.29 | + | 1.67  | + | 2.26  | + | -1.72 |
| VANGL1  | Q8TAA9 |   | 0.29 | + | 1.45  |   | 0.93  |   | -0.79 |

|              |            |  |      |   |       |   |       |   |       |
|--------------|------------|--|------|---|-------|---|-------|---|-------|
| DNM2         | P50570     |  | 0.29 |   | -0.31 |   | 1.15  |   | 0.12  |
| TPP2         | P29144     |  | 0.28 |   | -0.22 |   | -0.56 | + | 1.08  |
| CACNA2D<br>1 | P54289     |  | 0.28 |   | 0.83  | + | -1.81 |   | 1.20  |
| TFG          | Q92734     |  | 0.27 |   | 1.66  |   | 0.49  |   | -0.68 |
| ACAT2        | Q9BWD<br>1 |  | 0.25 |   | 0.22  |   | 2.21  |   | -0.90 |
| MGRN1        | O60291     |  | 0.24 |   | 0.58  |   | 1.04  |   | -0.45 |
| PTGES3       | Q15185     |  | 0.23 |   | -1.14 |   | 0.64  |   | 0.81  |
| RAB1A        | P62820     |  | 0.22 |   | 0.91  |   | 0.96  |   | -0.63 |
| COL6A2       | P12110     |  | 0.22 |   | 0.59  | + | -1.21 |   | 0.86  |
| GOLGA7       | Q7Z5G4     |  | 0.22 |   | 0.30  |   | 0.43  |   | 0.04  |
| KRT5         | P13647     |  | 0.22 |   | -0.88 |   | 0.75  |   | 0.55  |
| SERPINF2     | P08697     |  | 0.21 |   | 0.35  | + | -1.80 | + | 1.34  |
| ATP2B4       | P23634     |  | 0.21 |   | -0.21 | + | 0.98  |   | 0.00  |
| LYPLA1       | O75608     |  | 0.21 |   | 0.69  |   | 0.32  |   | -0.15 |
| GNA13        | Q14344     |  | 0.20 |   | 0.68  |   | 0.62  |   | -0.34 |
| CASK         | O14936     |  | 0.20 |   | 1.15  |   | 0.72  |   | -0.69 |
| TJP1         | Q07157     |  | 0.19 | + | 2.02  |   | -1.13 |   | -0.12 |
| EHD2         | Q9NZN4     |  | 0.19 | + | -1.62 |   | -0.49 | + | 1.67  |
| CIT          | O14578     |  | 0.18 | + | 2.73  | + | 1.61  | + | -2.20 |
| GDI2         | P50395     |  | 0.17 |   | -0.39 |   | 0.15  |   | 0.53  |
| ANGPTL2      | Q9UKU9     |  | 0.17 | + | 1.39  |   | -0.56 |   | -0.13 |
| FARP1        | Q9Y4F1     |  | 0.17 | + | 1.61  |   | 0.98  | + | -1.18 |
| RGS20        | O76081     |  | 0.17 |   | -0.02 | + | 1.50  |   | -0.52 |
| FLOT1        | O75955     |  | 0.16 |   | 0.56  |   | 0.45  |   | -0.25 |
| MOB1A        | Q9H8S9     |  | 0.16 | + | 1.47  |   | 0.33  |   | -0.72 |
| EHD3         | Q9NZN3     |  | 0.16 |   | 0.45  | + | -2.46 |   | 1.55  |
| WASF2        | Q9Y6W5     |  | 0.15 |   | 0.30  |   | 0.90  |   | -0.38 |
| TGOLN2       | O43493     |  | 0.14 |   | 0.72  |   | 0.30  |   | -0.30 |
| IPO7         | O95373     |  | 0.14 |   | -0.69 |   | 0.95  |   | 0.15  |
| F13A1        | P00488     |  | 0.14 |   | 0.47  |   | -1.76 |   | 1.08  |
| DIP2B        | Q9P265     |  | 0.13 | + | 1.89  | + | 1.38  | + | -1.67 |
| S100A13      | Q99584     |  | 0.13 |   | 0.77  |   | -0.03 |   | -0.16 |
| TIPRL        | O75663     |  | 0.13 |   | 0.20  |   | 1.03  |   | -0.46 |
| ERBIN        | Q96RT1     |  | 0.12 |   | 0.50  |   | 1.05  |   | -0.67 |

|           |        |  |       |   |       |   |       |   |       |
|-----------|--------|--|-------|---|-------|---|-------|---|-------|
| HBB       | P68871 |  | 0.11  |   | 0.66  | + | -1.40 |   | 0.69  |
| DYNC1H1   | Q14204 |  | 0.11  |   | 0.03  |   | -0.54 |   | 0.55  |
| KRT2      | P35908 |  | 0.11  |   | -0.57 |   | 0.38  |   | 0.36  |
| MICALL1   | Q8N3F8 |  | 0.10  |   | 0.29  |   | -0.07 |   | 0.10  |
| EEF1A1    | P68104 |  | 0.10  | + | -1.11 |   | 0.22  | + | 0.75  |
| HIST1H4A  | P62805 |  | 0.10  |   | 0.15  | + | -1.66 |   | 1.12  |
| RBM3      | P98179 |  | 0.09  | + | -1.70 |   | 0.25  | + | 1.07  |
| PSAT1     | Q9Y617 |  | 0.09  |   | -0.95 |   | 1.05  |   | 0.13  |
| GNAS      | P63092 |  | 0.09  |   | 0.06  | + | 0.83  | + | -0.33 |
| PLEC      | Q15149 |  | 0.08  |   | -0.29 |   | 1.58  |   | -0.61 |
| VPS45     | Q9NRW7 |  | 0.07  |   | 0.63  |   | 0.07  |   | -0.26 |
| PCBP1     | Q15365 |  | 0.06  | + | -0.90 |   | -0.19 | + | 0.79  |
| ATP1A1    | P05023 |  | 0.06  | + | 1.01  | + | 1.29  | + | -1.25 |
| CTNND1    | O60716 |  | 0.06  |   | -0.22 |   | -0.03 |   | 0.27  |
| LIMS1     | P48059 |  | 0.05  |   | -0.69 |   | -1.05 | + | 1.16  |
| TUBA1A    | Q71U36 |  | 0.04  |   | -0.93 |   | -0.17 |   | 0.76  |
| BAG2      | O95816 |  | 0.04  | + | 1.37  |   | -0.02 | + | -0.71 |
| DCLK1     | O15075 |  | 0.04  |   | 0.18  |   | -0.11 |   | 0.05  |
| PHGDH     | O43175 |  | 0.04  |   | 0.30  | + | 0.82  |   | -0.59 |
| TNFRSF10B | O14763 |  | 0.04  |   | -0.90 |   | -0.51 |   | 0.92  |
| EFNB2     | P52799 |  | 0.03  |   | -0.20 | + | -1.79 | + | 1.26  |
| PFAS      | O15067 |  | 0.03  |   | -0.16 |   | -0.04 |   | 0.18  |
| SMURF2    | Q9HAU4 |  | 0.03  |   | -0.78 |   | -0.69 | + | 0.94  |
| RACGAP1   | Q9H0H5 |  | 0.02  |   | 1.08  |   | 0.69  |   | -1.02 |
| SLC30A1   | Q9Y6M5 |  | 0.02  |   | 0.59  | + | 2.76  | + | -1.96 |
| SERPINA10 | Q9UK55 |  | 0.01  |   | -0.12 |   | 0.28  |   | -0.07 |
| RAB10     | P61026 |  | 0.00  |   | 0.31  |   | 0.37  |   | -0.41 |
| A2M       | P01023 |  | 0.00  | + | 1.88  |   | -1.67 |   | -0.13 |
| RPL30     | P62888 |  | 0.00  | + | -2.58 |   | 0.11  | + | 1.47  |
| EXT1      | Q16394 |  | -0.01 |   | 0.33  | + | -0.99 |   | 0.38  |
| SYNCRIP   | O60506 |  | -0.01 | + | -2.02 |   | 0.72  |   | 0.75  |
| HEBP1     | Q9NRV9 |  | -0.02 |   | 1.45  |   | 1.16  | + | -1.60 |
| TOLLIP    | Q9H0E2 |  | -0.02 | + | 1.86  |   | 1.35  | + | -1.97 |



|         |        |  |       |   |       |   |       |   |       |
|---------|--------|--|-------|---|-------|---|-------|---|-------|
| STXBP3  | O00186 |  | -0.02 |   | 0.06  | + | 1.11  |   | -0.75 |
| SLC3A2  | P08195 |  | -0.03 |   | 1.12  |   | 0.56  | + | -1.07 |
| SLC7A5  | Q01650 |  | -0.03 | + | 1.40  |   | 0.53  | + | -1.23 |
| CCT2    | P78371 |  | -0.04 |   | -0.44 |   | 0.15  |   | 0.08  |
| ILK     | Q13418 |  | -0.05 |   | -0.13 | + | -1.22 | + | 0.71  |
| CFL1    | P23528 |  | -0.05 |   | 0.31  |   | -0.02 |   | -0.28 |
| ANXA6   | P08133 |  | -0.05 | + | 1.14  | + | 1.01  | + | -1.41 |
| LDHA    | P00338 |  | -0.06 |   | -0.99 |   | 0.68  |   | 0.07  |
| NCAM1   | P13591 |  | -0.06 |   | 0.59  | + | -2.80 | + | 1.19  |
| LGALS1  | P09382 |  | -0.06 |   | -0.76 |   | 1.45  |   | -0.55 |
| YWHAE   | P62258 |  | -0.06 |   | 0.28  |   | 0.15  |   | -0.39 |
| MVP     | Q14764 |  | -0.07 |   | 0.35  | + | 1.38  | + | -1.19 |
| PTP4A2  | Q12974 |  | -0.08 |   | 0.56  |   | 0.65  |   | -0.90 |
| SLC12A7 | Q9Y666 |  | -0.08 |   | 0.50  |   | -0.21 |   | -0.35 |
| SRM     | P19623 |  | -0.08 |   | -0.21 | + | 1.43  | + | -0.92 |
| FTH1    | P02794 |  | -0.08 |   | 0.89  |   | -0.25 |   | -0.57 |
| SCAMP3  | O14828 |  | -0.09 | + | 0.71  |   | 0.37  | + | -0.85 |
| TNIK    | Q9UKE5 |  | -0.10 | + | 1.60  | + | 2.53  | + | -2.71 |
| NME1    | P15531 |  | -0.13 |   | -0.05 | + | 0.71  | + | -0.68 |
| STIP1   | P31948 |  | -0.13 | + | 0.53  |   | 0.07  | + | -0.65 |
| KRT10   | P13645 |  | -0.14 |   | -0.76 |   | 0.06  |   | 0.12  |
| CAP1    | Q01518 |  | -0.14 |   | -0.79 |   | 0.72  |   | -0.27 |
| CSNK1A1 | P48729 |  | -0.15 |   | 0.04  | + | -0.78 |   | 0.12  |
| STXBP2  | Q15833 |  | -0.15 |   | 0.55  | + | 2.12  | + | -1.93 |
| SCAMP1  | O15126 |  | -0.15 |   | 0.63  |   | 0.64  |   | -1.10 |
| AOX1    | Q06278 |  | -0.16 |   | -0.40 |   | 0.04  |   | -0.13 |
| FGB     | P02675 |  | -0.16 |   | -0.11 | + | -2.00 | + | 0.91  |
| CAPZA1  | P52907 |  | -0.16 |   | 0.31  | + | 0.71  | + | -0.97 |
| PHB2    | Q99623 |  | -0.17 |   | -1.39 |   | -1.48 |   | 1.35  |
| PSMB1   | P20618 |  | -0.18 | + | -0.65 |   | -0.56 |   | 0.33  |
| M6PR    | P20645 |  | -0.19 | + | 1.41  |   | -0.42 | + | -1.00 |
| HGS     | O14964 |  | -0.19 |   | 0.57  |   | 0.79  | + | -1.24 |
| PSMA1   | P25786 |  | -0.20 | + | -0.77 | + | -0.49 | + | 0.33  |
| PSMA5   | P28066 |  | -0.20 |   | -0.66 |   | -0.44 |   | 0.23  |
| RAB8A   | P61006 |  | -0.20 |   | 0.14  |   | 0.35  | + | -0.73 |

|         |             |   |       |   |       |   |       |   |       |
|---------|-------------|---|-------|---|-------|---|-------|---|-------|
| CLTC    | Q00610      |   | -0.20 | + | -1.39 | + | -0.64 | + | 0.78  |
| NEDD4L  | Q96PU5      |   | -0.21 |   | 0.54  |   | 0.71  | + | -1.21 |
| GSTZ1   | O43708      |   | -0.21 |   | -0.39 |   | -1.30 |   | 0.55  |
| EMILIN1 | Q9Y6C2      |   | -0.22 | + | 3.17  | + | -1.64 | + | -1.40 |
| PSMA7   | O14818      |   | -0.22 | + | -0.86 | + | -0.43 | + | 0.28  |
| SBDS    | Q9Y3A5      |   | -0.23 |   | 0.00  |   | 0.00  |   | -0.50 |
| WBP2    | Q969T9      |   | -0.23 |   | 1.13  |   | 0.28  | + | -1.35 |
| MTHFD1  | P11586      |   | -0.23 |   | -0.38 |   | -0.30 |   | -0.11 |
| COL6A3  | P12111      |   | -0.24 |   | -0.32 | + | -1.94 | + | 0.83  |
| PPIH    | O43447      |   | -0.24 |   | -0.09 | + | -1.02 |   | 0.14  |
| VPS25   | Q9BRG1      |   | -0.25 |   | -0.56 |   | -0.35 |   | 0.01  |
| ALDOA   | P04075      |   | -0.26 |   | 0.06  | + | 1.05  | + | -1.23 |
| YWHAZ   | P63104      |   | -0.26 |   | -0.06 |   | 0.50  | + | -0.84 |
| RUVBL2  | Q9Y230      |   | -0.27 | + | -1.82 |   | -0.79 |   | 0.97  |
| MYH9    | P35579      |   | -0.27 | + | -0.97 |   | 0.14  |   | -0.10 |
| FLNB    | O75369      |   | -0.27 | + | -2.84 |   | -2.45 | + | 2.57  |
| PEA15   | Q15121      |   | -0.27 |   | -0.39 |   | 0.31  |   | -0.56 |
| CCT6A   | P40227      | + | -0.27 | + | -0.67 |   | -0.01 |   | -0.20 |
| SGCB    | Q16585      |   | -0.28 |   | 0.59  |   | 1.25  | + | -1.71 |
| PAG1    | Q9NWWQ<br>8 |   | -0.28 |   | 0.32  |   | 0.91  |   | -1.35 |
| RAB5C   | P51148      |   | -0.28 | + | -0.58 | + | 0.46  | + | -0.55 |
| PSMA6   | P60900      |   | -0.28 | + | -0.50 | + | -1.02 |   | 0.29  |
| ANTXR1  | Q9H6X2      |   | -0.28 | + | -1.88 |   | -0.37 |   | 0.73  |
| CAPZB   | P47756      |   | -0.28 |   | 0.09  | + | 0.96  | + | -1.26 |
| SCARB2  | Q14108      |   | -0.29 |   | -0.02 |   | 2.16  | + | -1.93 |
| ESD     | P10768      |   | -0.30 |   | 0.12  |   | 0.29  |   | -0.90 |
| RPL32   | P62910      |   | -0.30 | + | -1.97 |   | 0.22  |   | 0.40  |
| LMNA    | P02545      |   | -0.30 |   | -0.42 |   | -0.24 |   | -0.27 |
| ADD1    | P35611      |   | -0.31 |   | -0.10 |   | -0.31 |   | -0.44 |
| PSMB4   | P28070      |   | -0.32 |   | -1.12 |   | -0.96 |   | 0.55  |
| NAMPT   | P43490      |   | -0.32 |   | -0.89 |   | 1.46  |   | -1.05 |
| MICAL1  | Q8TDZ2      |   | -0.32 |   | 0.42  |   | 0.78  | + | -1.42 |
| ANXA7   | P20073      |   | -0.32 | + | 1.02  |   | -0.42 | + | -1.07 |
| AARS    | P49588      |   | -0.32 |   | -0.51 |   | -0.10 |   | -0.34 |

|          |        |   |       |   |       |   |       |   |       |
|----------|--------|---|-------|---|-------|---|-------|---|-------|
| TSN      | Q15631 |   | -0.32 |   | -0.29 |   | 0.57  |   | -0.87 |
| SLC4A2   | P04920 |   | -0.33 |   | -1.03 |   | 2.34  |   | -1.50 |
| IFITM3   | Q01628 |   | -0.33 |   | 1.27  |   | -1.11 |   | -0.83 |
| PCNA     | P12004 |   | -0.34 |   | -0.16 |   | 1.48  |   | -1.55 |
| CDK1     | P06493 |   | -0.34 |   | 0.65  |   | -0.91 |   | -0.60 |
| MYOF     | Q9NZM1 |   | -0.34 | + | -4.56 | + | 2.76  |   | 0.32  |
| VIM      | P08670 |   | -0.35 | + | -1.02 | + | 0.56  | + | -0.50 |
| ARF3     | P61204 |   | -0.36 |   | -0.12 |   | -0.36 |   | -0.50 |
| RAB7A    | P51149 |   | -0.36 |   | -0.26 | + | 0.48  | + | -0.93 |
| PIIB     | P23284 |   | -0.37 |   | -0.60 |   | 0.08  |   | -0.50 |
| RDX      | P35241 |   | -0.37 |   | 1.81  |   | 1.59  | + | -2.85 |
| EIF5     | P55010 |   | -0.37 |   | 0.25  |   | -0.40 | + | -0.72 |
| TPI1     | P60174 |   | -0.38 |   | 0.12  |   | 0.20  | + | -1.01 |
| C5       | P01031 |   | -0.38 |   | -0.65 | + | -2.13 |   | 0.83  |
| SERPINH1 | P50454 |   | -0.39 |   | -0.15 |   | -0.64 |   | -0.39 |
| HSPA1A   | P08107 |   | -0.40 | + | 1.17  |   | 0.22  | + | -1.71 |
| TMEM59   | Q9BXS4 |   | -0.40 |   | 0.12  |   | 0.87  |   | -1.47 |
| RPS3A    | P61247 |   | -0.42 | + | -1.39 |   | -0.10 |   | -0.02 |
| S100A6   | P06703 |   | -0.42 |   | -1.75 |   | -1.70 |   | 1.16  |
| CAPG     | P40121 |   | -0.42 |   | 0.73  | + | 4.50  | + | -4.07 |
| TCP1     | P17987 | + | -0.43 | + | -0.74 | + | -0.44 |   | -0.23 |
| LMCD1    | Q9NZU5 |   | -0.43 |   | 0.09  |   | -0.69 |   | -0.58 |
| STX3     | Q13277 |   | -0.44 |   | 0.76  |   | 1.41  | + | -2.27 |
| CD9      | P21926 |   | -0.44 | + | -2.96 |   | 1.02  |   | 0.20  |
| BAIAP2   | Q9UQB8 |   | -0.44 |   | -0.75 |   | -0.27 |   | -0.36 |
| FGA      | P02671 |   | -0.46 |   | -0.49 | + | -2.67 |   | 0.89  |
| EXOC4    | Q96A65 |   | -0.46 |   | -0.48 |   | -0.06 |   | -0.69 |
| RPL17    | P18621 |   | -0.46 |   | -1.28 |   | -0.35 |   | -0.04 |
| NPM1     | P06748 | + | -0.47 | + | -1.22 |   | -0.38 |   | -0.07 |
| TUBA1B   | P68363 | + | -0.47 |   | -0.53 | + | -0.90 |   | -0.17 |
| CNDP2    | Q96KP4 |   | -0.47 |   | -0.84 |   | 0.96  |   | -1.10 |
| UBE2M    | P61081 |   | -0.47 |   | -0.15 |   | 0.06  | + | -0.99 |
| THBS1    | P07996 |   | -0.48 | + | -4.69 | + | -2.92 | + | 3.51  |
| TUBB     | P07437 | + | -0.48 | + | -0.88 |   | -0.35 |   | -0.32 |
| RPS17    | P0CW22 |   | -0.49 |   | -0.96 |   | 0.08  |   | -0.55 |

|          |            |   |       |   |       |   |       |   |       |
|----------|------------|---|-------|---|-------|---|-------|---|-------|
| FLG2     | Q5D862     |   | -0.49 |   | -1.66 |   | -1.14 |   | 0.60  |
| COL6A1   | P12109     |   | -0.49 |   | -0.33 | + | -1.51 |   | 0.03  |
| CTNNB1   | P35222     |   | -0.50 |   | -0.69 |   | -0.41 |   | -0.43 |
| P2RX7    | Q99572     |   | -0.50 |   | 1.54  |   | 0.23  | + | -2.17 |
| RNF149   | Q8NC42     |   | -0.50 |   | -0.09 |   | 0.94  | + | -1.62 |
| CDK5     | Q00535     | + | -0.51 |   | -0.41 | + | -0.83 |   | -0.38 |
| TTYH2    | Q9BSA4     |   | -0.51 | + | 2.36  | + | 2.92  | + | -4.29 |
| TWF1     | Q12792     |   | -0.52 |   | -1.21 |   | 0.76  |   | -0.87 |
| SERPINC1 | P01008     |   | -0.52 |   | -0.53 | + | -2.25 |   | 0.52  |
| CYSLTR2  | Q9NS75     |   | -0.53 |   | -0.87 |   | -0.14 |   | -0.55 |
| RAB9A    | P51151     |   | -0.53 |   | -1.05 |   | 0.57  |   | -0.87 |
| ENPP6    | Q6UWR<br>7 | + | -0.53 |   | -0.37 |   | -0.25 | + | -0.79 |
| ABCE1    | P61221     |   | -0.54 |   | -0.13 |   | -0.43 |   | -0.84 |
| SNX2     | O60749     |   | -0.54 |   | -0.11 |   | 0.18  | + | -1.22 |
| UGDH     | O60701     |   | -0.54 |   | 0.87  |   | -1.40 |   | -0.86 |
| USP5     | P45974     |   | -0.54 |   | -0.03 |   | -0.39 |   | -0.94 |
| CSTB     | P04080     |   | -0.54 |   | 0.64  |   | 1.84  | + | -2.67 |
| TSPAN10  | Q9H1Z9     |   | -0.55 |   | 1.99  |   | -1.24 | + | -1.65 |
| RPS8     | P62241     | + | -0.55 | + | -1.54 | + | -0.57 |   | 0.07  |
| TNS3     | Q68CZ2     |   | -0.55 |   | -0.55 |   | -0.32 |   | -0.69 |
| SCAMP2   | O15127     |   | -0.56 |   | -0.62 |   | 1.20  | + | -1.58 |
| TPM4     | P67936     |   | -0.58 | + | -2.19 |   | 0.24  |   | -0.11 |
| DYNLL2   | Q96FJ2     |   | -0.59 |   | -0.34 |   | 0.19  |   | -1.20 |
| SKIV2L   | Q15477     |   | -0.59 |   | -0.71 |   | -0.57 |   | -0.52 |
| CAPN2    | P17655     |   | -0.59 |   | -1.49 |   | 0.07  |   | -0.44 |
| PCMT1    | P22061     |   | -0.60 |   | -0.73 |   | 0.73  | + | -1.31 |
| XPO1     | O14980     |   | -0.60 |   | -0.97 |   | -0.36 |   | -0.52 |
| CORO1C   | Q9ULV4     |   | -0.60 |   | -0.98 |   | 0.50  | + | -1.03 |
| ANXA4    | P09525     |   | -0.60 |   | 0.16  |   | 0.56  | + | -1.75 |
| RPL6     | Q02878     |   | -0.60 | + | -2.19 |   | 0.21  |   | -0.13 |
| MTPN     | P58546     |   | -0.60 |   | -0.06 |   | 0.25  | + | -1.44 |
| EPB41L3  | Q9Y2J2     |   | -0.62 |   | -0.76 |   | 0.58  | + | -1.26 |
| THOP1    | P52888     |   | -0.63 |   | 0.08  |   | -0.72 |   | -0.99 |
| NAPRT    | Q6XQN6     |   | -0.63 |   | -0.92 |   | -0.27 |   | -0.67 |

|               |        |   |       |   |       |   |       |   |       |
|---------------|--------|---|-------|---|-------|---|-------|---|-------|
| CCT3          | P49368 | + | -0.63 | + | -1.10 | + | -0.75 |   | -0.28 |
| HPCAL1        | P37235 |   | -0.63 |   | -0.86 |   | -0.14 |   | -0.79 |
| PREP          | P48147 |   | -0.63 |   | -0.27 |   | -0.81 |   | -0.74 |
| VAMP7         | P51809 |   | -0.64 |   | -0.17 |   | -0.79 |   | -0.82 |
| VCL           | P18206 | + | -0.64 | + | -1.67 | + | -0.90 |   | 0.14  |
| C16orf62      | Q7Z3J2 |   | -0.65 |   | -0.72 |   | -0.56 |   | -0.66 |
| CCT7          | Q99832 | + | -0.65 | + | -1.12 | + | -0.45 | + | -0.49 |
| STAM          | Q92783 |   | -0.65 |   | 0.54  |   | 0.69  | + | -2.18 |
| RPS11         | P62280 |   | -0.66 |   | -1.31 |   | -0.84 |   | -0.15 |
| RAB11B        | Q15907 | + | -0.66 | + | -0.62 | + | -0.63 | + | -0.70 |
| TUBB4B        | P68371 | + | -0.66 | + | -0.95 |   | -0.69 |   | -0.47 |
| LUM           | P51884 | + | -0.66 | + | -1.09 |   | -0.15 |   | -0.72 |
| P2RX4         | Q99571 |   | -0.67 | + | -1.23 |   | 0.78  | + | -1.21 |
| GNAQ          | P50148 | + | -0.67 |   | -0.64 |   | -0.16 | + | -1.00 |
| PPP1CC        | P36873 |   | -0.68 |   | -0.38 |   | -0.18 |   | -1.17 |
| CSNK2A3       | Q8NEV1 |   | -0.68 |   | -0.66 |   | -0.26 |   | -0.95 |
| NDRG3         | Q9UGV2 |   | -0.69 |   | -1.23 |   | 1.27  | + | -1.54 |
| PSMD6         | Q15008 |   | -0.69 |   | -0.65 |   | -1.19 |   | -0.41 |
| DRG2          | P55039 | + | -0.69 |   | -0.79 |   | -0.41 | + | -0.79 |
| LMBRD1        | Q9NUN5 |   | -0.69 |   | -0.58 |   | -0.58 |   | -0.83 |
| SGCD          | Q92629 |   | -0.69 |   | -0.53 | + | 1.83  | + | -2.30 |
| SRI           | P30626 | + | -0.70 |   | 0.13  |   | -0.26 | + | -1.46 |
| PRPSAP1       | Q14558 |   | -0.70 |   | -0.55 |   | -0.55 |   | -0.88 |
| RRAGC         | Q9HB90 | + | -0.71 | + | -0.82 |   | -0.14 | + | -0.98 |
| RPS7          | P62081 |   | -0.71 | + | -2.24 |   | 0.11  |   | -0.29 |
| SOD1          | P00441 |   | -0.71 |   | 0.39  |   | 1.33  | + | -2.60 |
| USP7          | Q93009 | + | -0.72 |   | -0.37 |   | -0.80 | + | -0.87 |
| OSTF1         | Q92882 |   | -0.72 |   | -1.15 |   | 0.42  |   | -1.14 |
| HNRNPA2<br>B1 | P22626 | + | -0.72 |   | -0.76 |   | -0.52 | + | -0.83 |
| RPL21         | P46778 | + | -0.73 | + | -1.62 | + | -1.17 |   | 0.07  |
| AHNAK         | Q09666 |   | -0.73 |   | -0.40 |   | 1.20  | + | -2.09 |
| HSP90AB1      | P08238 | + | -0.73 | + | -1.31 |   | -0.40 | + | -0.58 |
| RAB8B         | Q92930 |   | -0.74 |   | 1.25  |   | 0.44  | + | -2.63 |
| PFKP          | Q01813 | + | -0.74 | + | -1.21 | + | -1.70 |   | 0.13  |

|             |            |   |       |   |       |   |       |   |       |
|-------------|------------|---|-------|---|-------|---|-------|---|-------|
| AP3D1       | O14617     | + | -0.74 |   | -0.76 |   | -0.73 |   | -0.74 |
| PLP1        | P60201     |   | -0.74 | + | 2.41  | + | 2.08  | + | -4.32 |
| APPL1       | Q9UKG1     | + | -0.74 |   | -1.05 |   | -0.75 |   | -0.56 |
| TUBB4A      | P04350     |   | -0.75 | + | -2.68 |   | -0.32 |   | 0.16  |
| POFUT1      | Q9H488     |   | -0.75 |   | -0.40 |   | -0.45 | + | -1.13 |
| GPI         | P06744     | + | -0.76 | + | -0.88 | + | 0.58  | + | -1.48 |
| CCT8        | P50990     | + | -0.76 | + | -1.17 | + | -0.84 | + | -0.47 |
| DBN1        | Q16643     |   | -0.76 | + | -1.92 |   | -1.04 |   | 0.10  |
| CCT4        | P50991     | + | -0.77 | + | -1.22 | + | -1.42 |   | -0.10 |
| UBE2N       | P61088     | + | -0.77 |   | -0.76 |   | -0.52 | + | -0.92 |
| MFSD12      | Q6NUT3     |   | -0.77 |   | -1.47 |   | 1.52  | + | -1.72 |
| POFUT2      | Q9Y2G5     |   | -0.78 |   | -0.27 |   | -0.91 |   | -1.00 |
| RTRAF       | Q9Y224     | + | -0.78 | + | -1.13 |   | -0.81 |   | -0.56 |
| GNA11       | P29992     | + | -0.78 | + | -1.02 |   | 0.27  | + | -1.28 |
| MAPRE2      | Q15555     | + | -0.79 |   | -0.82 |   | -0.94 |   | -0.68 |
| RRAS        | P10301     |   | -0.79 | + | -2.16 |   | -0.97 |   | 0.14  |
| AIDA        | Q96BJ3     |   | -0.79 |   | -0.50 |   | -0.11 | + | -1.38 |
| CAPN1       | P07384     | + | -0.79 | + | -1.86 |   | -0.72 |   | -0.20 |
| PTPRS       | Q13332     |   | -0.80 |   | 0.29  |   | 0.12  | + | -2.00 |
| CORO1B      | Q9BR76     |   | -0.80 |   | -1.01 |   | 0.20  |   | -1.27 |
| RRAGA       | Q7L523     |   | -0.80 | + | -1.52 |   | -0.44 |   | -0.57 |
| NAP1L4      | Q99733     |   | -0.80 | + | -0.68 |   | 0.49  | + | -1.66 |
| DNAJA4      | Q8WW2<br>2 |   | -0.82 |   | -1.08 |   | 0.12  |   | -1.23 |
| PRORS1<br>P | A6NEY8     | + | -0.82 |   | -0.51 | + | -1.03 | + | -0.89 |
| MYL6        | P60660     | + | -0.82 |   | -0.78 |   | -0.15 | + | -1.25 |
| EIF1AX      | P47813     |   | -0.83 |   | -0.56 |   | -0.38 |   | -1.26 |
| SNX3        | O60493     |   | -0.83 |   | -1.04 |   | 1.44  | + | -2.06 |
| CCT5        | P48643     | + | -0.83 | + | -1.04 | + | -0.61 | + | -0.84 |
| PEBP1       | P30086     |   | -0.84 |   | -0.39 |   | 0.49  | + | -1.90 |
| CAPZA2      | P47755     |   | -0.84 |   | -0.63 |   | 0.47  |   | -1.74 |
| PPP2R5D     | Q14738     | + | -0.84 |   | -0.18 |   | -0.45 | + | -1.47 |
| EPM2AIP1    | Q7L775     |   | -0.85 |   | -0.66 |   | -1.04 |   | -0.85 |
| NPC1        | O15118     |   | -0.85 |   | -0.32 |   | 0.52  | + | -1.99 |
| MATR3       | P43243     | + | -0.85 |   | -0.38 |   | -0.28 | + | -1.49 |

|           |        |   |       |   |       |   |       |   |       |
|-----------|--------|---|-------|---|-------|---|-------|---|-------|
| DSG1      | Q02413 |   | -0.86 |   | -1.77 |   | 0.17  |   | -0.93 |
| GSTO1     | P78417 |   | -0.86 |   | -0.35 |   | 1.06  | + | -2.31 |
| PPP2R5E   | Q16537 | + | -0.86 |   | -0.27 | + | -1.37 | + | -0.91 |
| TXNDC5    | Q8NBS9 |   | -0.86 |   | -1.22 |   | -0.39 |   | -0.92 |
| PFN1      | P07737 | + | -0.86 |   | -0.51 |   | -0.73 | + | -1.15 |
| KIF21A    | Q7Z4S6 | + | -0.86 |   | -0.64 |   | -1.18 |   | -0.80 |
| RUVBL1    | Q9Y265 | + | -0.87 | + | -1.26 | + | -1.02 |   | -0.54 |
| PDIA6     | Q15084 | + | -0.87 | + | -1.15 |   | -0.02 | + | -1.21 |
| LAMP2     | P13473 |   | -0.87 |   | -0.77 |   | 1.15  | + | -2.14 |
| PAPSS1    | O43252 |   | -0.88 |   | -0.75 |   | -1.32 |   | -0.68 |
| CCDC66    | A2RUB6 |   | -0.88 |   | 1.16  |   | -1.94 |   | -1.46 |
| RAB21     | Q9UL25 |   | -0.88 |   | -0.99 |   | -0.19 |   | -1.24 |
| DYNC1L1I2 | O43237 | + | -0.89 |   | -0.90 |   | -0.68 |   | -1.00 |
| SRP54     | P61011 | + | -0.89 | + | -1.08 | + | -0.94 | + | -0.74 |
| BLMH      | Q13867 | + | -0.89 |   | -0.90 |   | -0.32 | + | -1.23 |
| MYH10     | P35580 |   | -0.89 | + | 1.19  | + | 1.39  | + | -3.51 |
| EEF2      | P13639 | + | -0.90 | + | -1.54 | + | -0.60 | + | -0.69 |
| SCLY      | Q96I15 |   | -0.90 |   | -1.06 |   | -1.26 |   | -0.59 |
| MYO10     | Q9HD67 |   | -0.90 |   | -1.61 |   | -0.94 |   | -0.46 |
| PRPF8     | Q6P2Q9 | + | -0.91 | + | -0.98 | + | -1.27 | + | -0.64 |
| AAK1      | Q2M2I8 | + | -0.91 |   | -0.84 |   | -0.91 | + | -0.96 |
| ATL3      | Q6DD88 | + | -0.91 |   | -0.57 |   | -0.57 | + | -1.33 |
| CUTA      | O60888 |   | -0.92 |   | -0.89 |   | -0.52 |   | -1.18 |
| COL4A2    | P08572 |   | -0.92 | + | -2.43 | + | -2.32 |   | 0.81  |
| RPL7      | P18124 | + | -0.93 | + | -1.70 | + | -0.86 | + | -0.50 |
| PCSK1     | P29120 |   | -0.93 |   | -1.03 |   | -1.37 |   | -0.60 |
| SYN2      | Q92777 | + | -0.93 |   | -0.41 |   | -1.36 |   | -0.99 |
| MGEA5     | O60502 | + | -0.93 | + | -1.24 |   | -0.92 |   | -0.76 |
| ACP1      | P24666 |   | -0.93 |   | -0.65 |   | -1.47 |   | -0.79 |
| HSPA5     | P11021 | + | -0.94 | + | -2.70 |   | -0.28 |   | -0.27 |
| FRAS1     | Q86XX4 |   | -0.94 |   | -0.99 |   | -1.53 |   | -0.55 |
| SSB       | P05455 | + | -0.94 |   | -0.82 |   | -0.80 |   | -1.09 |
| SLC9A3R2  | Q15599 |   | -0.94 |   | 0.91  |   | -1.27 | + | -1.85 |
| KIF1A     | Q12756 | + | -0.94 |   | -0.74 |   | -0.93 | + | -1.08 |
| ACTG1     | P63261 | + | -0.95 | + | -0.65 |   | -0.22 | + | -1.56 |

|          |            |   |       |   |       |   |       |   |       |
|----------|------------|---|-------|---|-------|---|-------|---|-------|
| BLVRB    | P30043     | + | -0.96 |   | -1.02 |   | -0.87 |   | -0.97 |
| PSMD7    | P51665     |   | -0.96 |   | -1.83 |   | -1.11 |   | -0.35 |
| ACLY     | P53396     | + | -0.97 | + | -1.71 | + | -1.51 |   | -0.19 |
| MAP2K1   | Q02750     | + | -0.97 |   | -0.73 |   | -0.98 |   | -1.10 |
| EEF1D    | P29692     |   | -0.97 |   | -1.80 |   | 1.13  | + | -1.73 |
| HSP90AA1 | P07900     | + | -0.98 | + | -1.50 | + | -0.89 | + | -0.72 |
| AP2A1    | O95782     | + | -0.98 | + | -0.92 |   | -0.58 | + | -1.25 |
| PGK1     | P00558     | + | -0.98 | + | -1.02 |   | -0.40 | + | -1.31 |
| HTATSF1  | O43719     |   | -0.99 |   | -0.17 |   | -1.34 |   | -1.27 |
| ARPC1B   | O15143     | + | -0.99 | + | -1.49 |   | -0.32 | + | -1.09 |
| PRKAR1A  | P10644     |   | -1.00 |   | -0.31 |   | 0.94  | + | -2.58 |
| DYNLL1   | P63167     |   | -1.00 |   | -0.74 |   | 0.10  | + | -1.82 |
| GSN      | P06396     | + | -1.01 | + | -0.84 |   | 0.44  | + | -1.97 |
| RPS6     | P62753     | + | -1.01 | + | -2.11 |   | -0.29 | + | -0.77 |
| UBE2D2   | P62837     | + | -1.01 |   | -1.09 |   | -1.03 |   | -0.96 |
| SERINC1  | Q9NRX5     |   | -1.01 |   | 0.43  |   | 0.30  | + | -2.67 |
| ANLN     | Q9NQW<br>6 |   | -1.01 | + | 1.01  |   | 0.22  | + | -2.97 |
| PPP1CA   | P62136     | + | -1.03 | + | -1.20 | + | -0.76 | + | -1.09 |
| ATP6V1C1 | P21283     | + | -1.03 | + | -1.36 |   | -0.28 | + | -1.29 |
| NAA15    | Q9BXJ9     | + | -1.03 |   | -0.47 |   | -1.30 | + | -1.21 |
| GOLM1    | Q8NBJ4     | + | -1.03 |   | -1.08 |   | -1.07 |   | -0.98 |
| PARK7    | Q99497     |   | -1.04 |   | -0.68 |   | 1.06  | + | -2.52 |
| RPL19    | P84098     | + | -1.05 | + | -2.10 |   | -0.11 | + | -0.99 |
| ALDH3A2  | P51648     | + | -1.05 |   | -0.82 | + | -1.32 | + | -1.03 |
| YWHAB    | P31946     | + | -1.05 | + | -0.79 | + | -0.76 | + | -1.39 |
| XPNPEP1  | Q9NQW<br>7 | + | -1.06 | + | -2.19 | + | -0.97 |   | -0.42 |
| SRRT     | Q9BXP5     | + | -1.06 |   | -0.55 |   | -0.62 | + | -1.63 |
| DIP2C    | Q9Y2E4     |   | -1.06 | + | 1.42  |   | 0.76  | + | -3.64 |
| KTN1     | Q86UP2     | + | -1.08 |   | 0.11  |   | -1.16 | + | -1.74 |
| PDIA3    | P30101     | + | -1.08 | + | -1.62 |   | -0.58 | + | -1.05 |
| KPNB1    | Q14974     | + | -1.09 | + | -0.94 | + | -0.52 | + | -1.51 |
| IDI1     | Q13907     | + | -1.09 |   | -1.20 |   | -0.66 | + | -1.28 |
| GPMB     | Q14956     |   | -1.09 |   | 0.62  |   | -1.92 |   | -1.62 |
| ME1      | P48163     | + | -1.09 |   | -1.32 |   | -1.16 |   | -0.91 |



|         |        |   |       |   |       |   |       |   |       |
|---------|--------|---|-------|---|-------|---|-------|---|-------|
| STX12   | Q86Y82 |   | -1.09 |   | -1.90 |   | 0.81  | + | -1.75 |
| PPP1CB  | P62140 | + | -1.09 |   | -1.02 |   | -1.02 | + | -1.18 |
| APOE    | P02649 | + | -1.11 |   | 0.25  | + | -0.49 | + | -2.30 |
| HSPH1   | Q92598 | + | -1.11 | + | -0.79 | + | -0.79 | + | -1.50 |
| FERMT3  | Q86UX7 | + | -1.11 |   | -0.45 | + | -2.35 |   | -0.77 |
| GNPNAT1 | Q96EK6 | + | -1.11 | + | -1.61 |   | -1.52 |   | -0.57 |
| NAPA    | P54920 | + | -1.11 | + | -1.24 |   | -0.36 | + | -1.49 |
| LANCL1  | O43813 | + | -1.12 | + | -1.31 |   | -0.60 | + | -1.31 |
| MDH1    | P40925 | + | -1.12 |   | -0.39 |   | 0.03  | + | -2.24 |
| TP53RK  | Q96S44 | + | -1.12 |   | -1.38 |   | -0.64 |   | -1.25 |
| IQGAP1  | P46940 |   | -1.12 |   | -0.33 |   | 0.69  | + | -2.69 |
| USP9X   | Q93008 | + | -1.12 |   | -0.81 |   | -1.71 |   | -0.96 |
| HNRNPH1 | P31943 | + | -1.13 |   | -1.10 | + | -1.30 | + | -1.05 |
| PSMB5   | P28074 | + | -1.13 | + | -1.91 | + | -1.71 |   | -0.32 |
| RPS24   | P62847 | + | -1.14 |   | -1.83 |   | -0.63 |   | -1.04 |
| TLN1    | Q9Y490 | + | -1.14 | + | -1.68 | + | -0.77 | + | -1.05 |
| PRMT5   | O14744 | + | -1.15 |   | -1.11 |   | -0.58 | + | -1.51 |
| CUL3    | Q13618 |   | -1.16 |   | -1.67 |   | -1.14 |   | -0.85 |
| CADM1   | Q9BY67 |   | -1.16 | + | -1.98 |   | 1.59  | + | -2.32 |
| PPP6C   | O00743 | + | -1.17 |   | -1.31 |   | -1.13 |   | -1.10 |
| KCTD12  | Q96CX2 | + | -1.17 |   | -1.10 |   | -0.92 | + | -1.35 |
| CPOX    | P36551 | + | -1.17 |   | -1.05 |   | -0.99 | + | -1.34 |
| LYPLA2  | O95372 | + | -1.17 |   | -1.97 |   | -0.72 |   | -0.96 |
| GSTP1   | P09211 | + | -1.17 | + | -1.08 |   | -0.37 | + | -1.71 |
| FAP     | Q12884 |   | -1.17 |   | -1.43 |   | -0.66 |   | -1.32 |
| AMPD2   | Q01433 | + | -1.18 |   | -0.44 | + | -1.48 | + | -1.43 |
| HIBADH  | P31937 | + | -1.18 |   | -1.44 |   | -1.38 |   | -0.90 |
| VASP    | P50552 |   | -1.18 |   | -1.79 |   | -0.43 |   | -1.27 |
| SYNJ1   | O43426 | + | -1.19 |   | -0.95 |   | -0.89 | + | -1.50 |
| ATP1B1  | P05026 | + | -1.19 |   | 0.11  | + | -1.25 | + | -1.93 |
| RNMT    | O43148 | + | -1.19 |   | -1.00 |   | -1.64 | + | -1.03 |
| EPHX2   | P34913 | + | -1.19 |   | -0.94 | + | -1.51 | + | -1.15 |
| HRNR    | Q86YZ3 |   | -1.20 |   | -1.56 |   | 0.16  |   | -1.80 |
| S100A10 | P60903 | + | -1.20 |   | -0.48 |   | 0.06  | + | -2.39 |
| SNRPD3  | P62318 |   | -1.20 |   | -0.71 |   | -2.06 |   | -0.99 |

|         |        |   |       |   |       |   |       |   |       |
|---------|--------|---|-------|---|-------|---|-------|---|-------|
| PRDX1   | Q06830 | + | -1.21 |   | 0.32  | + | -1.29 | + | -2.07 |
| S100A11 | P31949 |   | -1.21 |   | -0.66 |   | 0.15  | + | -2.35 |
| SF3B1   | O75533 | + | -1.21 | + | -1.75 | + | -1.52 |   | -0.70 |
| RPL35A  | P18077 | + | -1.21 |   | -1.60 |   | -0.51 |   | -1.40 |
| USP14   | P54578 | + | -1.21 |   | -0.96 |   | -0.43 | + | -1.83 |
| PPP5C   | P53041 | + | -1.21 |   | -0.92 |   | -1.36 |   | -1.30 |
| EPB41L1 | Q9H4G0 | + | -1.22 |   | -1.22 | + | -1.44 | + | -1.08 |
| BPHL    | Q86WA6 | + | -1.22 | + | -1.25 |   | -0.52 | + | -1.63 |
| TJP2    | Q9UDY2 | + | -1.23 | + | -1.67 | + | -1.21 | + | -0.97 |
| UTRN    | P46939 |   | -1.23 |   | 0.81  |   | 0.86  | + | -3.70 |
| VWA5A   | O00534 | + | -1.24 | + | -1.67 |   | -0.60 | + | -1.36 |
| AHCYL2  | Q96HN2 | + | -1.24 | + | -1.16 | + | -1.67 | + | -1.03 |
| LRBA    | P50851 |   | -1.24 |   | -1.54 |   | -1.07 |   | -1.17 |
| MCCC2   | Q9HCC0 | + | -1.26 | + | -1.53 | + | -1.21 | + | -1.12 |
| YWHAQ   | P27348 | + | -1.27 | + | -1.25 |   | -0.77 | + | -1.59 |
| ACTR3   | P61158 | + | -1.28 | + | -2.02 | + | -1.20 | + | -0.88 |
| LPP     | Q93052 | + | -1.28 | + | -2.19 |   | -1.20 |   | -0.78 |
| AIMP2   | Q13155 | + | -1.28 | + | -1.44 | + | -1.38 | + | -1.12 |
| G6PD    | P11413 | + | -1.28 | + | -0.97 |   | -0.50 | + | -1.94 |
| SEC22B  | O75396 | + | -1.28 |   | -0.71 |   | 0.17  | + | -2.50 |
| DSTN    | P60981 | + | -1.29 |   | -0.25 |   | 0.24  | + | -2.82 |
| SEC23A  | Q15436 | + | -1.29 |   | -1.30 |   | -1.31 |   | -1.26 |
| TM9SF3  | Q9HD45 | + | -1.30 |   | -0.54 |   | -1.96 |   | -1.36 |
| GOT1    | P17174 | + | -1.30 |   | -0.51 |   | 0.26  | + | -2.71 |
| CLPP    | Q16740 | + | -1.31 |   | -1.52 | + | -1.61 |   | -0.99 |
| ATP9A   | O75110 | + | -1.32 |   | -1.15 | + | -1.65 | + | -1.21 |
| ARPC2   | O15144 | + | -1.32 | + | -2.61 | + | -1.43 |   | -0.48 |
| RAB1B   | Q9H0U4 | + | -1.32 | + | -1.06 | + | -1.06 | + | -1.63 |
| PPP2CA  | P67775 | + | -1.32 | + | -1.14 |   | -0.93 | + | -1.66 |
| TTYH3   | Q9C0H2 | + | -1.32 |   | -1.10 | + | -1.62 | + | -1.28 |
| DCTN1   | Q14203 | + | -1.32 |   | -1.08 | + | -1.70 | + | -1.24 |
| GCAT    | O75600 | + | -1.33 |   | -0.96 | + | -2.07 |   | -1.10 |
| GSK3A   | P49840 | + | -1.33 |   | -0.59 |   | -1.68 | + | -1.56 |
| PDLIM1  | O00151 | + | -1.34 | + | -1.03 | + | -1.42 | + | -1.47 |
| TWF2    | Q6IBS0 | + | -1.34 |   | -0.89 |   | -1.44 | + | -1.55 |

|          |        |   |       |   |       |   |       |   |       |
|----------|--------|---|-------|---|-------|---|-------|---|-------|
| RPL3     | P39023 | + | -1.35 | + | -2.29 | + | -1.26 | + | -0.84 |
| UHL5     | Q9Y5K5 | + | -1.35 |   | -1.35 |   | -1.04 | + | -1.53 |
| AP2B1    | P63010 | + | -1.35 | + | -1.54 | + | -1.00 | + | -1.44 |
| CSPG4    | Q6UVK1 |   | -1.35 | + | 4.54  | + | 2.60  | + | -7.26 |
| RPL1     | P05386 | + | -1.35 |   | -1.22 | + | -2.10 |   | -0.99 |
| MFAP2    | P55001 | + | -1.36 |   | -1.70 |   | -1.53 |   | -1.05 |
| DNAJC13  | O75165 | + | -1.36 |   | -0.91 |   | -0.77 | + | -1.98 |
| P4HB     | P07237 | + | -1.36 | + | -1.48 |   | -0.38 | + | -1.88 |
| AP2M1    | Q96CW1 | + | -1.37 |   | -0.62 |   | -0.90 | + | -2.10 |
| AP2A2    | O94973 | + | -1.37 |   | -0.45 |   | -0.15 | + | -2.66 |
| SKP1     | P63208 | + | -1.37 | + | -2.07 |   | -0.32 | + | -1.59 |
| TPP1     | O14773 | + | -1.38 |   | -1.58 |   | -0.70 | + | -1.67 |
| SERPINE2 | P07093 | + | -1.39 |   | -1.48 |   | -1.37 | + | -1.35 |
| PLS3     | P13797 | + | -1.39 | + | -2.19 |   | -0.04 | + | -1.72 |
| EPCAM    | P16422 | + | -1.40 |   | -1.13 |   | -1.09 | + | -1.75 |
| CSRP2    | Q16527 | + | -1.40 |   | -1.50 |   | -1.65 |   | -1.20 |
| EIF3E    | P60228 | + | -1.41 |   | -0.90 |   | -1.28 | + | -1.78 |
| CTSB     | P07858 | + | -1.41 | + | -1.76 |   | -1.41 | + | -1.19 |
| DBI      | P07108 |   | -1.41 |   | -0.68 |   | -1.82 |   | -1.60 |
| AP3M1    | Q9Y2T2 | + | -1.43 | + | -1.56 | + | -1.94 | + | -1.04 |
| GSK3B    | P49841 | + | -1.44 |   | -1.60 |   | -0.91 | + | -1.65 |
| HNRNPM   | P52272 | + | -1.44 | + | -1.71 | + | -2.44 |   | -0.67 |
| FARSA    | Q9Y285 | + | -1.44 | + | -1.61 |   | -1.06 | + | -1.56 |
| PSME2    | Q9UL46 | + | -1.44 | + | -1.82 |   | -0.87 | + | -1.55 |
| PPIA     | P62937 | + | -1.45 |   | -0.68 |   | -0.94 | + | -2.21 |
| RAB38    | P57729 | + | -1.45 |   | -0.20 |   | -0.10 | + | -3.01 |
| PYCR3    | Q53H96 | + | -1.45 |   | -1.74 |   | -1.45 |   | -1.28 |
| ACAA1    | P09110 | + | -1.46 | + | -1.28 | + | -1.92 | + | -1.30 |
| UAP1     | Q16222 | + | -1.46 |   | -0.54 | + | -1.62 | + | -1.92 |
| CAPNS1   | P04632 | + | -1.47 | + | -2.37 | + | -1.10 | + | -1.15 |
| RAB4B    | P61018 | + | -1.48 |   | -1.13 |   | -1.13 | + | -1.91 |
| QARS     | P47897 | + | -1.49 | + | -1.67 | + | -1.54 | + | -1.34 |
| PMPCB    | O75439 | + | -1.49 | + | -1.77 |   | -1.35 | + | -1.40 |
| RPL18    | Q07020 | + | -1.49 | + | -2.26 | + | -1.36 | + | -1.10 |
| ZRANB2   | O95218 | + | -1.49 | + | -1.36 | + | -1.38 | + | -1.64 |

|              |        |   |       |   |       |   |       |   |       |
|--------------|--------|---|-------|---|-------|---|-------|---|-------|
| RAB27A       | P51159 | + | -1.49 |   | 0.69  |   | -0.98 | + | -3.11 |
| UGP2         | Q16851 | + | -1.49 | + | -0.85 |   | 0.25  | + | -2.93 |
| EIF3F        | O00303 | + | -1.50 | + | -2.48 |   | 0.24  | + | -1.95 |
| GLOD4        | Q9HC38 | + | -1.50 | + | -1.26 | + | -1.25 | + | -1.79 |
| AHCY         | P23526 | + | -1.50 | + | -1.25 | + | -2.30 | + | -1.17 |
| NQO1         | P15559 | + | -1.50 | + | -1.25 |   | -0.06 | + | -2.52 |
| LMAN2        | Q12907 | + | -1.52 |   | -0.93 | + | -1.80 | + | -1.71 |
| RBBP7        | Q16576 | + | -1.52 |   | -2.01 |   | -1.25 |   | -1.40 |
| EDNRB        | P24530 | + | -1.53 |   | -0.04 |   | -0.24 | + | -3.20 |
| HDAC1        | Q13547 | + | -1.53 | + | -1.58 | + | -1.81 | + | -1.34 |
| UROD         | P06132 | + | -1.55 | + | -2.09 |   | -1.54 |   | -1.22 |
| GMPR         | P36959 | + | -1.55 | + | -2.55 |   | 0.23  | + | -2.02 |
| HACD3        | Q9P035 | + | -1.55 | + | -1.58 | + | -1.57 | + | -1.52 |
| RPS23        | P62266 | + | -1.55 | + | -2.76 | + | -1.60 | + | -0.79 |
| EVA1B        | Q9NVM1 | + | -1.56 | + | 0.94  |   | -0.12 | + | -3.92 |
| GALM         | Q96C23 | + | -1.56 |   | -1.65 | + | -1.82 | + | -1.35 |
| CUL2         | Q13617 | + | -1.56 |   | -1.21 |   | -1.40 | + | -1.87 |
| TOM1         | O60784 | + | -1.56 |   | 0.34  |   | -0.07 | + | -3.60 |
| KLC1         | Q07866 | + | -1.57 |   | -2.19 |   | -0.24 | + | -1.99 |
| LRRC59       | Q96AG4 | + | -1.57 | + | -1.82 |   | -1.01 | + | -1.76 |
| UBA1         | P22314 | + | -1.58 | + | -1.75 | + | -1.41 | + | -1.58 |
| RPL8         | P62917 | + | -1.58 | + | -2.89 | + | -0.85 | + | -1.24 |
| SEC23B       | Q15437 | + | -1.59 | + | -1.94 | + | -1.81 | + | -1.25 |
| FLNA         | P21333 | + | -1.59 | + | -1.68 | + | -1.50 | + | -1.60 |
| VPS35        | Q96QK1 | + | -1.61 | + | -1.89 | + | -0.91 | + | -1.86 |
| SRP72        | O76094 | + | -1.61 | + | -1.69 |   | -1.22 | + | -1.79 |
| FKBP5        | Q13451 | + | -1.61 |   | -1.38 |   | -1.52 | + | -1.80 |
| LZTFL1       | Q9NQ48 | + | -1.61 | + | -2.09 |   | -1.43 | + | -1.43 |
| HNRNPUL<br>2 | Q1KMD3 | + | -1.61 |   | -1.59 |   | -1.55 | + | -1.67 |
| YWHAG        | P61981 | + | -1.61 | + | -1.56 | + | -1.57 | + | -1.67 |
| RPS10        | P46783 | + | -1.62 | + | -2.19 | + | -1.84 | + | -1.13 |
| TARDBP       | Q13148 | + | -1.62 | + | -1.59 | + | -1.54 | + | -1.69 |
| EIF4A2       | Q14240 | + | -1.62 | + | -1.45 | + | -1.68 | + | -1.69 |
| FREM2        | Q5SZK8 | + | -1.62 |   | -1.28 | + | -2.44 |   | -1.33 |

|              |        |   |       |   |       |   |       |   |       |
|--------------|--------|---|-------|---|-------|---|-------|---|-------|
| EIF3I        | Q13347 | + | -1.62 |   | -1.49 |   | -1.15 | + | -1.99 |
| SNRPD1       | P62314 | + | -1.62 | + | -1.83 |   | -1.45 | + | -1.60 |
| RPL13        | P26373 | + | -1.63 | + | -2.88 | + | -1.21 | + | -1.12 |
| RPS4X        | P62701 | + | -1.63 | + | -2.69 | + | -1.93 | + | -0.82 |
| PKM          | P14618 | + | -1.64 | + | -1.69 | + | -1.08 | + | -1.94 |
| RAB18        | Q9NP72 | + | -1.64 |   | -1.88 |   | -1.76 |   | -1.42 |
| XPO7         | Q9UIA9 | + | -1.64 | + | -1.35 | + | -1.77 | + | -1.74 |
| GNAI1        | P63096 | + | -1.65 |   | -0.86 |   | 0.67  | + | -3.51 |
| RAP1GDS<br>1 | P52306 | + | -1.65 | + | -2.08 | + | -1.32 | + | -1.59 |
| DCTN2        | Q13561 | + | -1.65 |   | -1.75 | + | -2.36 |   | -1.16 |
| RPL7A        | P62424 | + | -1.65 | + | -3.16 | + | -1.50 | + | -0.83 |
| YWHAH        | Q04917 | + | -1.65 | + | -0.93 | + | -0.88 | + | -2.54 |
| LAMTOR1      | Q6IAA8 | + | -1.66 |   | 0.25  |   | -0.55 | + | -3.46 |
| VDAC1        | P21796 | + | -1.66 |   | -1.52 |   | -1.22 | + | -2.00 |
| EIF4A3       | P38919 | + | -1.66 | + | -3.54 | + | -2.47 |   | -0.05 |
| ABCF1        | Q8NE71 | + | -1.66 | + | -2.26 | + | -1.81 | + | -1.22 |
| RPL28        | P46779 | + | -1.67 |   | -0.87 |   | -2.62 |   | -1.58 |
| PSMD12       | O00232 | + | -1.67 | + | -1.80 | + | -2.81 |   | -0.92 |
| NHLRC2       | Q8NBF2 | + | -1.67 | + | -1.59 | + | -1.91 | + | -1.58 |
| TTLL12       | Q14166 | + | -1.68 |   | -0.70 |   | -0.51 | + | -2.96 |
| SSR4         | P51571 | + | -1.68 | + | -2.24 |   | -1.26 | + | -1.60 |
| PTPRM        | P28827 | + | -1.68 |   | -2.16 |   | -0.58 | + | -2.05 |
| CMBL         | Q96DG6 | + | -1.69 |   | -2.16 |   | -1.64 |   | -1.44 |
| PEPD         | P12955 | + | -1.70 | + | -2.12 |   | -0.11 | + | -2.39 |
| SF3A3        | Q12874 | + | -1.70 | + | -1.84 |   | -1.64 | + | -1.64 |
| B4GAT1       | O43505 | + | -1.70 |   | -1.28 | + | -2.14 | + | -1.69 |
| SRSF6        | Q13247 | + | -1.70 |   | -1.83 |   | -1.79 |   | -1.57 |
| RPL18A       | Q02543 | + | -1.71 | + | -2.98 | + | -2.67 |   | -0.36 |
| UQCRC1       | P31930 | + | -1.71 |   | -1.30 |   | -2.16 |   | -1.69 |
| NDUFS1       | P28331 | + | -1.71 | + | -1.72 | + | -2.52 |   | -1.23 |
| ACTR2        | P61160 | + | -1.72 | + | -2.58 | + | -1.99 | + | -1.04 |
| NMT1         | P30419 | + | -1.72 |   | -1.07 | + | -2.17 | + | -1.84 |
| RPS15A       | P62244 | + | -1.73 |   | -1.67 |   | -2.42 |   | -1.35 |
| SLC1A4       | P43007 |   | -1.73 |   | 1.21  | + | 1.56  | + | -5.47 |

|         |        |   |       |   |       |   |       |   |       |
|---------|--------|---|-------|---|-------|---|-------|---|-------|
| ACAA2   | P42765 | + | -1.74 |   | -1.12 |   | -1.45 | + | -2.28 |
| SNU13   | P55769 | + | -1.74 | + | -1.88 | + | -2.23 | + | -1.36 |
| PPP2R1A | P30153 | + | -1.74 | + | -2.01 | + | -1.29 | + | -1.84 |
| PSMC3   | P17980 | + | -1.74 | + | -1.45 | + | -2.49 | + | -1.47 |
| PFN2    | P35080 |   | -1.74 |   | -2.55 |   | -1.64 |   | -1.32 |
| OLA1    | Q9NTK5 | + | -1.75 | + | -1.81 |   | -0.61 | + | -2.40 |
| SPTBN1  | Q01082 | + | -1.76 |   | -0.37 | + | 0.74  | + | -4.09 |
| RBP4    | P02753 | + | -1.76 | + | -2.62 |   | -1.19 |   | -1.59 |
| KARS    | Q15046 | + | -1.76 | + | -2.13 |   | -1.26 | + | -1.85 |
| ISOC1   | Q96CN7 | + | -1.77 |   | -1.71 |   | -1.46 | + | -1.98 |
| ITM2C   | Q9NQX7 |   | -1.77 |   | -2.88 |   | 1.50  | + | -3.06 |
| ITM2B   | Q9Y287 | + | -1.77 |   | -1.28 |   | -2.43 |   | -1.67 |
| NARS    | O43776 | + | -1.77 | + | -1.58 | + | -2.15 | + | -1.67 |
| LGALS3  | P17931 |   | -1.78 |   | 1.16  |   | 0.65  | + | -4.99 |
| FOLH1   | Q04609 | + | -1.78 |   | -1.86 |   | -1.77 | + | -1.73 |
| EIF2S3  | P41091 | + | -1.79 | + | -2.12 | + | -2.61 |   | -1.10 |
| CTNNA1  | P35221 |   | -1.79 | + | -6.63 |   | 0.09  |   | -0.02 |
| RPL27A  | P46776 | + | -1.80 | + | -3.27 | + | -1.50 | + | -1.09 |
| GANAB   | Q14697 | + | -1.80 | + | -2.30 | + | -3.06 |   | -0.74 |
| WDR61   | Q9GZS3 | + | -1.80 |   | -1.00 |   | -1.83 | + | -2.27 |
| CORO7   | P57737 | + | -1.81 |   | -1.71 |   | -1.81 |   | -1.86 |
| PRDX2   | P32119 | + | -1.81 |   | 0.14  |   | -0.63 | + | -3.68 |
| AKR7A2  | O43488 | + | -1.81 |   | -1.54 |   | -1.51 | + | -2.14 |
| LARS    | Q9P2J5 | + | -1.81 | + | -1.91 | + | -1.37 | + | -2.02 |
| GMPS    | P49915 | + | -1.82 | + | -2.04 |   | -1.04 | + | -2.14 |
| RPS26   | P62854 | + | -1.82 | + | -2.53 | + | -1.71 | + | -1.46 |
| FGF2    | P09038 | + | -1.82 | + | -1.47 | + | -2.47 | + | -1.64 |
| ARL8B   | Q9NVJ2 | + | -1.83 |   | -1.30 |   | -0.56 | + | -2.91 |
| SDHA    | P31040 | + | -1.83 | + | -1.83 | + | -1.69 | + | -1.92 |
| GPR143  | P51810 | + | -1.83 | + | -2.81 |   | -1.30 |   | -1.57 |
| PDPR    | Q8NCN5 | + | -1.84 | + | -2.18 |   | -1.62 | + | -1.77 |
| GSPT1   | P15170 | + | -1.84 | + | -2.30 |   | -0.84 | + | -2.16 |
| ACADM   | P11310 | + | -1.85 | + | -1.88 | + | -2.00 | + | -1.75 |
| LDHB    | P07195 | + | -1.86 | + | -1.82 | + | -1.77 | + | -1.92 |
| PLXNC1  | O60486 | + | -1.86 |   | -1.98 |   | -0.07 | + | -2.86 |

|        |        |   |       |   |       |   |       |   |       |
|--------|--------|---|-------|---|-------|---|-------|---|-------|
| ARPC3  | O15145 | + | -1.86 | + | -2.68 | + | -1.57 | + | -1.55 |
| RPL10  | P27635 | + | -1.86 | + | -3.12 | + | -1.85 | + | -1.11 |
| STX7   | O15400 | + | -1.86 |   | -0.49 |   | 0.52  | + | -4.11 |
| HSPA4L | O95757 | + | -1.86 | + | -2.14 | + | -2.04 | + | -1.60 |
| EIF4E  | P06730 | + | -1.88 |   | -1.56 | + | -2.34 |   | -1.79 |
| ME2    | P23368 | + | -1.88 | + | -2.41 | + | -1.87 | + | -1.57 |
| VPS26A | O75436 | + | -1.88 | + | -2.28 | + | -1.93 | + | -1.62 |
| CANX   | P27824 | + | -1.89 | + | -2.21 | + | -1.23 | + | -2.10 |
| SNTB2  | Q13425 | + | -1.90 |   | -1.91 |   | -1.19 | + | -2.31 |
| PI4K2A | Q9BTU6 | + | -1.90 | + | -1.96 |   | -1.23 | + | -2.27 |
| WARS   | P23381 | + | -1.91 | + | -1.50 | + | -1.08 | + | -2.65 |
| RPL22  | P35268 | + | -1.91 | + | -2.39 |   | -2.31 |   | -1.38 |
| HSPA13 | P48723 | + | -1.92 | + | -2.07 | + | -2.80 | + | -1.29 |
| NEFH   | P12036 | + | -1.92 | + | -1.77 | + | -2.21 | + | -1.83 |
| CTSD   | P07339 | + | -1.92 |   | -1.47 |   | -0.66 | + | -2.94 |
| SND1   | Q7KZF4 | + | -1.92 | + | -2.36 |   | -0.29 | + | -2.63 |
| PSMD13 | Q9UNM6 | + | -1.92 | + | -2.68 | + | -2.88 |   | -0.89 |
| SORD   | Q00796 | + | -1.92 |   | -1.47 |   | -1.63 | + | -2.37 |
| PCCA   | P05165 | + | -1.93 |   | -1.59 | + | -1.98 | + | -2.10 |
| UPF1   | Q92900 | + | -1.94 | + | -3.00 | + | -1.34 | + | -1.66 |
| IARS   | P41252 | + | -1.94 | + | -2.33 | + | -2.32 | + | -1.49 |
| SNAP25 | P60880 | + | -1.94 | + | -1.98 | + | -2.55 | + | -1.56 |
| GALE   | Q14376 | + | -1.95 |   | -1.11 |   | -1.18 | + | -2.91 |
| NPLOC4 | Q8TAT6 | + | -1.95 | + | -2.30 |   | -1.48 | + | -2.02 |
| TALDO1 | P37837 | + | -1.96 | + | -3.15 | + | 1.20  | + | -3.14 |
| PSMD1  | Q99460 | + | -1.97 | + | -3.14 |   | -0.61 | + | -2.08 |
| CSNK2B | P67870 | + | -1.97 | + | -1.69 |   | -1.43 | + | -2.46 |
| RPL13A | P40429 | + | -1.97 | + | -2.25 | + | -2.18 | + | -1.69 |
| PRELP  | P51888 | + | -1.98 | + | -2.27 |   | -1.23 | + | -2.26 |
| UBA3   | Q8TBC4 | + | -1.98 |   | -1.90 |   | -1.92 | + | -2.06 |
| PTPA   | Q15257 | + | -1.99 |   | -1.79 |   | -1.60 | + | -2.34 |
| ILF2   | Q12905 | + | -1.99 | + | -3.59 | + | -3.45 |   | -0.15 |
| RPL24  | P83731 | + | -2.00 | + | -2.83 | + | -2.58 |   | -1.14 |
| HBZ    | P02008 | + | -2.00 | + | -1.79 | + | -3.33 | + | -1.32 |
| TRPV2  | Q9Y5S1 |   | -2.02 | + | 1.23  | + | 1.68  | + | -6.18 |

|          |        |   |       |   |       |   |       |   |       |
|----------|--------|---|-------|---|-------|---|-------|---|-------|
| WDR1     | O75083 | + | -2.04 | + | -1.74 | + | -1.63 | + | -2.45 |
| ATP1B2   | P14415 | + | -2.04 | + | -2.70 | + | -2.28 | + | -1.50 |
| DNM1L    | O00429 | + | -2.04 | + | -2.05 | + | -3.17 | + | -1.36 |
| PSME1    | Q06323 | + | -2.04 | + | -2.00 | + | -1.88 | + | -2.17 |
| HINT1    | P49773 | + | -2.05 |   | -1.36 |   | -0.50 | + | -3.39 |
| F10      | P00742 | + | -2.05 | + | -1.97 | + | -1.82 | + | -2.24 |
| MFAP4    | P55083 | + | -2.06 | + | -2.63 | + | -2.41 | + | -1.50 |
| WDFY1    | Q8IWB7 | + | -2.07 | + | -1.37 |   | 0.64  | + | -4.11 |
| RPL37A   | P61513 | + | -2.07 | + | -2.11 | + | -2.06 | + | -2.05 |
| CPD      | O75976 | + | -2.08 | + | -1.81 | + | -1.62 | + | -2.53 |
| ATP8A1   | Q9Y2Q0 | + | -2.08 |   | -1.73 | + | -1.97 | + | -2.37 |
| SERPINB6 | P35237 |   | -2.09 |   | -2.76 |   | 3.39  | + | -4.98 |
| PSMD8    | P48556 | + | -2.10 | + | -3.13 | + | -1.78 | + | -1.68 |
| PDCD4    | Q53EL6 | + | -2.11 | + | -2.60 |   | -1.63 | + | -2.10 |
| KIT      | P10721 | + | -2.11 |   | -1.74 | + | -2.95 |   | -1.82 |
| SNRPD2   | P62316 | + | -2.11 | + | -2.47 | + | -2.35 | + | -1.75 |
| CCAR1    | Q8IX12 | + | -2.12 | + | -2.15 | + | -2.25 | + | -2.01 |
| EEA1     | Q15075 | + | -2.13 | + | -2.32 | + | -2.13 | + | -2.02 |
| TNPO1    | Q92973 | + | -2.13 | + | -1.98 | + | -0.66 | + | -3.10 |
| COPS8    | Q99627 | + | -2.13 | + | -1.95 | + | -2.24 | + | -2.17 |
| MYO5A    | Q9Y4I1 | + | -2.13 | + | -3.21 |   | 0.71  | + | -3.19 |
| ACTR1B   | P42025 | + | -2.13 |   | -1.94 | + | -2.25 | + | -2.18 |
| LAMTOR3  | Q9UHA4 | + | -2.14 | + | -2.09 | + | -1.76 | + | -2.39 |
| CBR1     | P16152 | + | -2.14 | + | -2.45 |   | -0.21 | + | -3.11 |
| STAT1    | P42224 | + | -2.14 | + | -2.75 | + | -0.70 | + | -2.64 |
| CTPS2    | Q9NRF8 | + | -2.14 | + | -2.29 | + | -1.75 | + | -2.28 |
| PSMC5    | P62195 | + | -2.14 | + | -2.32 | + | -2.82 | + | -1.63 |
| PFKM     | P08237 | + | -2.15 | + | -3.80 |   | -0.87 | + | -1.93 |
| SEC24D   | O94855 | + | -2.15 | + | -2.14 | + | -2.03 | + | -2.23 |
| RAB32    | Q13637 | + | -2.15 | + | -2.02 |   | 0.21  | + | -3.66 |
| TMED4    | Q7Z7H5 | + | -2.15 | + | -1.91 | + | -2.34 | + | -2.18 |
| ACADSB   | P45954 | + | -2.16 | + | -2.48 |   | -1.53 | + | -2.34 |
| PIP4K2B  | P78356 | + | -2.16 | + | -2.06 |   | -1.79 | + | -2.44 |
| UBA6     | A0AVT1 | + | -2.16 | + | -2.30 |   | -1.74 | + | -2.33 |
| PYGB     | P11216 | + | -2.16 | + | -2.01 | + | -2.19 | + | -2.24 |



|         |        |   |       |   |       |   |       |   |       |
|---------|--------|---|-------|---|-------|---|-------|---|-------|
| RPS18   | P62269 | + | -2.16 | + | -3.74 | + | -1.90 | + | -1.38 |
| SLC7A8  | Q9UHI5 | + | -2.17 | + | -3.14 |   | 0.15  | + | -2.97 |
| RPL5    | P46777 | + | -2.17 | + | -3.58 | + | -1.85 | + | -1.51 |
| CRIP2   | P52943 | + | -2.17 | + | -3.21 |   | -0.34 | + | -2.64 |
| DDX1    | Q92499 | + | -2.17 | + | -2.97 |   | -1.62 | + | -2.01 |
| ALDOC   | P09972 | + | -2.17 | + | -2.00 |   | 0.09  | + | -3.63 |
| HNRNPU  | Q00839 | + | -2.19 | + | -1.27 | + | -5.62 | + | -0.69 |
| PSMD2   | Q13200 | + | -2.19 | + | -3.28 | + | -3.59 |   | -0.71 |
| PIP4P1  | Q86T03 | + | -2.20 | + | -2.74 | + | -1.83 | + | -2.09 |
| TMED10  | P49755 | + | -2.21 | + | -2.68 | + | -1.94 | + | -2.08 |
| PSMC4   | P43686 | + | -2.21 |   | -1.97 | + | -2.69 | + | -2.06 |
| RAB5B   | P61020 | + | -2.21 | + | -0.98 | + | -1.59 | + | -3.32 |
| PCK2    | Q16822 | + | -2.22 |   | -1.87 | + | -2.55 | + | -2.23 |
| STRAP   | Q9Y3F4 | + | -2.22 | + | -1.63 | + | -1.71 | + | -2.89 |
| EIF3D   | O15371 | + | -2.22 |   | -1.38 |   | -0.84 | + | -3.57 |
| ATP6V1D | Q9Y5K8 | + | -2.23 | + | -2.25 |   | -1.72 | + | -2.52 |
| RPN1    | P04843 | + | -2.23 | + | -2.96 | + | -1.66 | + | -2.14 |
| DNAJC5  | Q9H3Z4 | + | -2.24 |   | -0.43 | + | -1.44 | + | -3.80 |
| SART3   | Q15020 | + | -2.27 | + | -2.27 | + | -2.15 | + | -2.34 |
| EIF3B   | P55884 | + | -2.27 | + | -2.01 |   | -0.51 | + | -3.49 |
| RACK1   | P63244 | + | -2.28 | + | -2.61 | + | -1.87 | + | -2.33 |
| RPS2    | P15880 | + | -2.28 | + | -3.21 | + | -2.98 | + | -1.30 |
| RPL9    | P32969 | + | -2.28 | + | -3.48 | + | -1.91 | + | -1.79 |
| DHX9    | Q08211 | + | -2.29 | + | -2.79 | + | -2.37 | + | -1.94 |
| HADHA   | P40939 | + | -2.29 | + | -2.39 | + | -2.58 | + | -2.06 |
| PC      | P11498 | + | -2.30 | + | -2.73 |   | -1.55 | + | -2.50 |
| SRP68   | Q9UHB9 | + | -2.30 | + | -2.33 | + | -2.23 | + | -2.33 |
| PGM2L1  | Q6PCE3 | + | -2.30 | + | -2.04 | + | -2.40 | + | -2.41 |
| CSRP1   | P21291 | + | -2.31 | + | -2.42 | + | -2.06 | + | -2.39 |
| VAMP3   | Q15836 | + | -2.31 |   | -0.92 |   | 0.19  | + | -4.65 |
| RPS25   | P62851 | + | -2.33 | + | -4.68 | + | -1.02 | + | -1.70 |
| PSMD4   | P55036 | + | -2.34 | + | -2.28 |   | -1.50 | + | -2.87 |
| ASS1    | P00966 | + | -2.34 | + | -2.09 | + | -3.45 | + | -1.82 |
| RPL14   | P50914 | + | -2.35 | + | -3.99 | + | -2.18 | + | -1.46 |
| PTPRN   | Q16849 | + | -2.35 |   | -1.97 | + | -2.57 | + | -2.44 |

|         |        |   |       |   |       |   |       |   |       |
|---------|--------|---|-------|---|-------|---|-------|---|-------|
| TIMP3   | P35625 | + | -2.35 | + | -2.19 | + | -1.54 | + | -2.94 |
| RPL4    | P36578 | + | -2.36 | + | -3.82 | + | -2.58 | + | -1.36 |
| DARS    | P14868 | + | -2.37 | + | -2.58 | + | -2.82 | + | -1.97 |
| MYLK    | Q15746 | + | -2.37 | + | -2.39 | + | -2.23 | + | -2.44 |
| EML4    | Q9HC35 | + | -2.37 | + | -2.50 | + | -3.12 | + | -1.84 |
| ATIC    | P31939 | + | -2.38 | + | -2.70 | + | -1.82 | + | -2.52 |
| ALDH7A1 | P49419 | + | -2.38 | + | -2.55 | + | -2.52 | + | -2.20 |
| DHDH    | Q9UQ10 | + | -2.38 | + | -2.88 |   | -1.77 | + | -2.45 |
| TUBB3   | Q13509 | + | -2.39 | + | -3.09 | + | -1.97 | + | -2.22 |
| ASNS    | P08243 | + | -2.40 | + | -2.61 | + | -2.26 | + | -2.37 |
| BPNT1   | O95861 | + | -2.41 | + | -2.73 |   | -1.26 | + | -2.91 |
| HUWE1   | Q7Z6Z7 | + | -2.42 | + | -2.51 |   | -2.06 | + | -2.59 |
| PMM2    | O15305 | + | -2.43 | + | -2.83 |   | -1.58 | + | -2.69 |
| SAE1    | Q9UBE0 | + | -2.43 | + | -2.94 | + | -2.71 | + | -1.95 |
| SLC25A6 | P12236 | + | -2.43 | + | -3.46 | + | -2.21 | + | -1.95 |
| PSMC1   | P62191 | + | -2.44 | + | -3.02 | + | -3.44 | + | -1.50 |
| PAK2    | Q13177 | + | -2.45 | + | -2.67 |   | -1.55 | + | -2.87 |
| PPP2R2A | P63151 | + | -2.45 | + | -2.49 |   | -1.98 | + | -2.72 |
| AKR1A1  | P14550 | + | -2.46 |   | -0.89 | + | -2.44 | + | -3.42 |
| FERMT2  | Q96AC1 | + | -2.47 | + | -3.69 | + | -4.89 |   | -0.30 |
| RARS    | P54136 | + | -2.47 | + | -2.43 | + | -2.27 | + | -2.62 |
| NEFM    | P07197 | + | -2.47 |   | -1.64 | + | -3.24 | + | -2.52 |
| SEC31A  | O94979 | + | -2.48 |   | -2.05 | + | -2.54 | + | -2.70 |
| RPSA    | P08865 | + | -2.48 | + | -3.58 | + | -2.01 | + | -2.10 |
| QDPR    | P09417 | + | -2.49 | + | -1.23 | + | -1.08 | + | -4.08 |
| TST     | Q16762 | + | -2.51 |   | -2.17 |   | -2.30 | + | -2.84 |
| SEPT2   | Q15019 | + | -2.51 | + | -0.81 | + | -1.00 | + | -4.44 |
| RPS14   | P62263 | + | -2.51 | + | -3.87 | + | -1.92 | + | -2.06 |
| RABGGTA | Q92696 | + | -2.52 | + | -2.81 | + | -2.34 | + | -2.46 |
| PSMD11  | O00231 | + | -2.52 | + | -2.78 | + | -3.52 | + | -1.77 |
| EEF1G   | P26641 | + | -2.53 | + | -3.71 | + | -2.64 | + | -1.76 |
| SEPT3   | Q9UH03 | + | -2.54 | + | -2.28 | + | -2.81 | + | -2.52 |
| EPRS    | P07814 | + | -2.55 |   | -1.25 | + | -3.83 | + | -2.56 |
| PSMC6   | P62333 | + | -2.56 | + | -2.72 | + | -3.39 | + | -1.97 |
| CRYM    | Q14894 | + | -2.57 | + | -2.61 | + | -2.33 | + | -2.69 |

|         |        |   |       |   |       |   |       |   |       |
|---------|--------|---|-------|---|-------|---|-------|---|-------|
| SEPT9   | Q9UHD8 | + | -2.58 | + | -0.65 | + | -1.06 | + | -4.64 |
| RPLP0   | P05388 | + | -2.58 | + | -5.61 | + | -2.37 | + | -0.89 |
| CKMT1A  | P12532 | + | -2.61 |   | -2.27 | + | -2.42 | + | -2.93 |
| RAB6A   | P20340 | + | -2.62 | + | -1.58 | + | -2.70 | + | -3.19 |
| NAE1    | Q13564 | + | -2.62 | + | -2.28 | + | -2.71 | + | -2.77 |
| AP1G1   | O43747 | + | -2.62 | + | -3.05 | + | -1.99 | + | -2.74 |
| MLANA   | Q16655 | + | -2.62 |   | 0.26  |   | 0.53  | + | -6.25 |
| RAB5A   | P20339 | + | -2.62 | + | -3.09 |   | -2.14 | + | -2.63 |
| RPL15   | P61313 | + | -2.64 | + | -3.28 | + | -2.61 | + | -2.27 |
| KIF5B   | P33176 | + | -2.66 | + | -2.93 | + | -1.69 | + | -3.08 |
| SYT5    | O00445 | + | -2.66 | + | -2.47 | + | -2.81 | + | -2.68 |
| GSTM1   | P09488 | + | -2.66 | + | -2.57 | + | -2.52 | + | -2.80 |
| CYB5R3  | P00387 | + | -2.66 | + | -2.63 |   | -2.07 | + | -3.04 |
| SPTAN1  | Q13813 | + | -2.67 | + | -1.38 |   | 0.12  | + | -5.11 |
| PFKL    | P17858 | + | -2.67 | + | -3.32 | + | -2.55 | + | -2.35 |
| CMPK1   | P30085 | + | -2.68 | + | -3.04 | + | -1.20 | + | -3.35 |
| VAMP2   | P63027 | + | -2.68 |   | -2.46 | + | -3.13 | + | -2.55 |
| PDK3    | Q15120 | + | -2.69 | + | -2.59 | + | -2.40 | + | -2.92 |
| EIF3L   | Q9Y262 | + | -2.69 | + | -2.37 |   | -1.39 | + | -3.67 |
| DDB1    | Q16531 | + | -2.69 | + | -2.90 |   | -1.42 | + | -3.33 |
| AKR1B1  | P15121 | + | -2.70 | + | -2.93 | + | -1.90 | + | -3.04 |
| NPEPL1  | Q8NDH3 | + | -2.71 | + | -2.84 |   | -2.52 | + | -2.74 |
| PRPSAP2 | O60256 | + | -2.71 | + | -3.03 | + | -2.13 | + | -2.86 |
| PAICS   | P22234 | + | -2.71 | + | -2.84 | + | -2.82 | + | -2.57 |
| AP1B1   | Q10567 | + | -2.74 |   | -1.95 |   | -1.90 | + | -3.71 |
| PSMD5   | Q16401 | + | -2.74 | + | -2.54 | + | -3.73 | + | -2.27 |
| IPO5    | O00410 | + | -2.74 | + | -2.87 | + | -2.81 | + | -2.62 |
| RPS5    | P46782 | + | -2.76 | + | -2.93 | + | -2.01 | + | -3.11 |
| PCCB    | P05166 | + | -2.76 | + | -2.88 | + | -2.58 | + | -2.80 |
| RAB2A   | P61019 | + | -2.78 | + | -1.87 | + | -2.25 | + | -3.64 |
| RAN     | P62826 | + | -2.78 | + | -3.35 | + | -2.64 | + | -2.52 |
| ENO3    | P13929 | + | -2.78 | + | -3.25 |   | -2.65 | + | -2.58 |
| SYP     | P08247 | + | -2.80 | + | -2.97 | + | -2.69 | + | -2.77 |
| SRSF3   | P84103 | + | -2.81 | + | -3.41 | + | -3.66 | + | -1.96 |
| PLD3    | Q8IV08 | + | -2.82 | + | -3.09 | + | -2.82 | + | -2.66 |

|          |        |   |       |   |       |   |       |   |       |
|----------|--------|---|-------|---|-------|---|-------|---|-------|
| DCPS     | Q96C86 | + | -2.84 | + | -2.95 | + | -2.69 | + | -2.87 |
| PGAM1    | P18669 | + | -2.85 | + | -2.79 | + | -2.07 | + | -3.35 |
| SF3B3    | Q15393 | + | -2.85 | + | -2.91 | + | -3.39 | + | -2.48 |
| PRKAR2B  | P31323 | + | -2.86 | + | -2.45 | + | -2.98 | + | -3.04 |
| MARS     | P56192 | + | -2.88 | + | -2.49 | + | -4.39 | + | -2.21 |
| HSPA9    | P38646 | + | -2.88 | + | -4.52 | + | -1.78 | + | -2.56 |
| ACADS    | P16219 | + | -2.89 | + | -3.40 | + | -2.53 | + | -2.80 |
| GPX1     | P07203 | + | -2.89 | + | -3.29 | + | -3.07 | + | -2.54 |
| GDF15    | Q99988 | + | -2.90 |   | -0.03 | + | -4.59 | + | -3.60 |
| NAA50    | Q9GZZ1 | + | -2.90 | + | -3.53 | + | -2.90 | + | -2.53 |
| ASNA1    | O43681 | + | -2.91 | + | -3.66 | + | -1.84 | + | -3.10 |
| SARS     | P49591 | + | -2.92 | + | -2.67 | + | -1.57 | + | -3.87 |
| PAFAH1B2 | P68402 | + | -2.92 | + | -3.08 | + | -2.71 | + | -2.95 |
| BCKDHA   | P12694 | + | -2.93 | + | -3.00 | + | -3.02 | + | -2.83 |
| HSPA4    | P34932 | + | -2.93 | + | -1.69 | + | -1.33 | + | -4.64 |
| ALDH5A1  | P51649 | + | -2.93 | + | -3.11 | + | -2.98 | + | -2.79 |
| HSPD1    | P10809 | + | -2.93 | + | -4.19 | + | -2.81 | + | -2.25 |
| COPB2    | P35606 | + | -2.93 | + | -3.13 | + | -2.35 | + | -3.17 |
| EIF2A    | Q9BY44 | + | -2.94 | + | -2.77 | + | -2.39 | + | -3.37 |
| GFPT1    | Q06210 | + | -2.94 | + | -3.49 | + | -1.73 | + | -3.33 |
| ATP6V1H  | Q9UI12 | + | -2.94 | + | -2.72 | + | -2.52 | + | -3.32 |
| DYNC1I1  | O14576 | + | -2.94 | + | -2.84 | + | -3.14 | + | -2.89 |
| PPME1    | Q9Y570 | + | -2.96 | + | -2.46 | + | -2.96 | + | -3.26 |
| SRSF1    | Q07955 | + | -2.96 | + | -4.35 | + | -3.07 | + | -2.06 |
| RPL10A   | P62906 | + | -2.97 | + | -4.06 | + | -2.78 | + | -2.42 |
| MAT2B    | Q9NZL9 | + | -2.97 | + | -2.98 | + | -2.39 | + | -3.31 |
| AHCYL1   | O43865 | + | -2.97 | + | -1.72 | + | -1.08 | + | -4.85 |
| PLAA     | Q9Y263 | + | -2.97 | + | -3.24 | + | -2.18 | + | -3.28 |
| MLEC     | Q14165 | + | -2.97 | + | -3.19 | + | -1.89 | + | -3.49 |
| DCTN4    | Q9UJW0 | + | -2.97 | + | -1.94 | + | -3.39 | + | -3.34 |
| UBA2     | Q9UBT2 | + | -2.98 |   | -1.61 |   | -1.72 | + | -4.55 |
| RPS27    | P42677 | + | -2.98 | + | -4.67 | + | -2.32 | + | -2.37 |
| SEPT6    | Q14141 | + | -2.99 | + | -1.58 | + | -1.38 | + | -4.80 |
| GSTM2    | P28161 | + | -3.00 | + | -2.79 | + | -3.22 | + | -2.99 |
| RAB3C    | Q96E17 | + | -3.00 | + | -3.22 | + | -3.04 | + | -2.85 |

|          |        |   |       |   |       |   |       |   |       |
|----------|--------|---|-------|---|-------|---|-------|---|-------|
| SSR1     | P43307 | + | -3.01 | + | -2.91 | + | -2.58 | + | -3.33 |
| GARS     | P41250 | + | -3.02 | + | -3.42 |   | -1.16 | + | -3.90 |
| MAPK1    | P28482 | + | -3.02 | + | -2.94 | + | -2.35 | + | -3.47 |
| COPB1    | P53618 | + | -3.03 | + | -2.78 | + | -3.07 | + | -3.16 |
| PGLS     | O95336 | + | -3.04 | + | -3.22 | + | -1.86 | + | -3.63 |
| EIF3C    | Q99613 | + | -3.04 | + | -4.27 | + | -2.38 | + | -2.70 |
| CPE      | P16870 | + | -3.05 | + | -3.45 | + | -3.25 | + | -2.69 |
| OCA2     | Q04671 | + | -3.07 | + | -2.77 | + | -3.49 | + | -3.00 |
| DPYSL5   | Q9BPU6 | + | -3.07 | + | -3.74 | + | -3.59 | + | -2.36 |
| RPS9     | P46781 | + | -3.07 | + | -3.06 | + | -3.89 | + | -2.59 |
| EML2     | O95834 | + | -3.08 | + | -2.02 | + | -3.71 | + | -3.34 |
| NDRG2    | Q9UN36 | + | -3.09 | + | -3.02 | + | -3.31 | + | -3.00 |
| RRBP1    | Q9P2E9 | + | -3.10 | + | -3.27 | + | -3.41 | + | -2.81 |
| ACTA2    | P62736 | + | -3.12 | + | -3.17 | + | -2.14 | + | -3.67 |
| TMED7    | Q9Y3B3 | + | -3.13 | + | -3.18 | + | -2.60 | + | -3.40 |
| HINT2    | Q9BX68 | + | -3.13 | + | -3.21 | + | -3.56 | + | -2.82 |
| SUCLG2   | Q96I99 | + | -3.13 | + | -3.08 | + | -2.58 | + | -3.50 |
| RNPEP    | Q9H4A4 | + | -3.15 | + | -4.52 | + | -2.15 | + | -2.92 |
| PGM5     | Q15124 | + | -3.15 | + | -3.30 | + | -3.22 | + | -3.02 |
| DNPEP    | Q9ULA0 | + | -3.16 | + | -3.98 | + | -2.97 | + | -2.78 |
| HDHD2    | Q9H0R4 | + | -3.16 | + | -3.00 | + | -3.34 | + | -3.15 |
| GPS1     | Q13098 | + | -3.19 | + | -3.49 | + | -3.26 | + | -2.98 |
| OTUB1    | Q96FW1 | + | -3.20 | + | -3.08 | + | -2.78 | + | -3.52 |
| MYO1D    | O94832 | + | -3.21 |   | -1.11 |   | -0.42 | + | -6.15 |
| COPS6    | Q7L5N1 | + | -3.21 | + | -3.41 | + | -3.58 | + | -2.87 |
| SEC13    | P55735 | + | -3.23 | + | -3.80 | + | -3.51 | + | -2.71 |
| ALDH18A1 | P54886 | + | -3.23 | + | -2.94 | + | -3.05 | + | -3.51 |
| GSTM3    | P21266 | + | -3.23 | + | -2.30 | + | -4.08 | + | -3.28 |
| AP1M1    | Q9BXS5 | + | -3.23 | + | -4.25 | + | -2.35 | + | -3.16 |
| BUB3     | O43684 | + | -3.24 | + | -3.88 | + | -2.62 | + | -3.22 |
| SEPT11   | Q9NVA2 | + | -3.24 | + | -1.28 | + | -1.71 | + | -5.33 |
| PRPF19   | Q9UMS4 | + | -3.25 | + | -3.53 | + | -3.25 | + | -3.08 |
| RPS12    | P25398 | + | -3.25 | + | -4.39 | + | -1.77 | + | -3.46 |
| HNRNPK   | P61978 | + | -3.26 | + | -5.05 | + | -3.23 | + | -2.20 |
| ETFB     | P38117 | + | -3.27 | + | -3.34 | + | -3.25 | + | -3.23 |

|          |        |   |       |   |       |   |       |   |       |
|----------|--------|---|-------|---|-------|---|-------|---|-------|
| OSGEP    | Q9NPF4 | + | -3.29 | + | -2.62 | + | -3.27 | + | -3.70 |
| ACAT1    | P24752 | + | -3.29 | + | -3.07 | + | -4.08 | + | -2.94 |
| KATNAL2  | Q8IYT4 | + | -3.30 | + | -3.13 | + | -2.92 | + | -3.62 |
| ABHD14B  | Q96IU4 | + | -3.32 | + | -3.43 | + | -2.52 | + | -3.72 |
| PDXP     | Q96GD0 | + | -3.32 | + | -3.79 | + | -3.38 | + | -3.00 |
| ALDH6A1  | Q02252 | + | -3.32 | + | -3.62 | + | -3.78 | + | -2.87 |
| HNRNPA3  | P51991 | + | -3.33 | + | -4.01 | + | -2.93 | + | -3.16 |
| PHPT1    | Q9NRX4 | + | -3.33 | + | -2.61 | + | -3.85 | + | -3.46 |
| VAT1     | Q99536 | + | -3.34 | + | -2.12 | + | -1.51 | + | -5.17 |
| LMAN1    | P49257 | + | -3.35 | + | -2.84 | + | -4.55 | + | -2.92 |
| TM9SF4   | Q92544 | + | -3.35 | + | -3.50 | + | -2.97 | + | -3.48 |
| VCP      | P55072 | + | -3.35 | + | -4.03 | + | -1.69 | + | -3.93 |
| ABAT     | P80404 | + | -3.35 | + | -3.12 | + | -3.01 | + | -3.69 |
| PGRMC1   | O00264 | + | -3.35 | + | -4.33 | + | -2.71 | + | -3.14 |
| BCKDHB   | P21953 | + | -3.36 | + | -3.75 | + | -3.11 | + | -3.29 |
| PRKACB   | P22694 | + | -3.36 | + | -2.79 | + | -2.91 | + | -3.98 |
| COPS5    | Q92905 | + | -3.38 | + | -3.92 | + | -2.05 | + | -3.85 |
| GCLC     | P48506 | + | -3.38 | + | -3.49 | + | -3.09 | + | -3.49 |
| ATP6V1E1 | P36543 | + | -3.39 | + | -3.15 | + | -1.96 | + | -4.38 |
| C1orf123 | Q9NWV4 | + | -3.40 | + | -2.90 | + | -3.89 | + | -3.41 |
| PCSK2    | P16519 | + | -3.41 | + | -3.18 | + | -3.22 | + | -3.67 |
| GMPPB    | Q9Y5P6 | + | -3.42 | + | -3.75 | + | -2.30 | + | -3.90 |
| RPN2     | P04844 | + | -3.42 | + | -3.23 | + | -3.96 | + | -3.21 |
| ARPC1A   | Q92747 | + | -3.43 | + | -5.39 | + | -5.43 | + | -1.06 |
| TXNL1    | O43396 | + | -3.44 | + | -3.95 | + | -3.07 | + | -3.35 |
| TM9SF2   | Q99805 | + | -3.44 | + | -2.90 | + | -1.70 | + | -4.81 |
| EIF3A    | Q14152 | + | -3.44 | + | -3.92 | + | -3.74 | + | -2.98 |
| ETFA     | P13804 | + | -3.45 | + | -4.01 | + | -3.47 | + | -3.09 |
| VAMP8    | Q9BV40 | + | -3.46 | + | -3.70 | + | -2.67 | + | -3.78 |
| DDX39B   | Q13838 | + | -3.46 | + | -4.45 | + | -4.57 | + | -2.20 |
| PYGL     | P06737 | + | -3.48 | + | -1.92 | + | -4.28 | + | -3.93 |
| ACSS3    | Q9H6R3 | + | -3.49 | + | -3.33 | + | -2.99 | + | -3.89 |
| CORO1A   | P31146 | + | -3.49 | + | -3.47 | + | -2.92 | + | -3.85 |
| OAT      | P04181 | + | -3.49 | + | -3.70 | + | -3.10 | + | -3.60 |

|          |        |   |       |   |       |   |       |   |       |
|----------|--------|---|-------|---|-------|---|-------|---|-------|
| ARPC4    | P59998 | + | -3.50 | + | -5.05 | + | -4.19 | + | -2.15 |
| SYN1     | P17600 | + | -3.54 | + | -3.23 | + | -3.97 | + | -3.46 |
| AVP      | P01185 | + | -3.54 | + | -4.00 | + | -3.49 | + | -3.29 |
| PURA     | Q00577 | + | -3.55 | + | -3.83 | + | -2.77 | + | -3.84 |
| RPS20    | P60866 | + | -3.55 | + | -6.21 | + | -2.51 | + | -2.57 |
| ACO1     | P21399 | + | -3.55 | + | -2.52 | + | -5.72 | + | -2.87 |
| FSCN1    | Q16658 | + | -3.57 | + | -4.89 | + | -3.95 | + | -2.56 |
| ENO2     | P09104 | + | -3.59 | + | -2.56 | + | -3.21 | + | -4.43 |
| DDOST    | P39656 | + | -3.61 | + | -4.26 | + | -3.97 | + | -3.00 |
| RAB14    | P61106 | + | -3.61 | + | -3.84 | + | -3.02 | + | -3.82 |
| NSF      | P46459 | + | -3.63 | + | -4.49 | + | -2.75 | + | -3.63 |
| PRDX4    | Q13162 | + | -3.63 | + | -3.54 |   | -2.53 | + | -4.34 |
| NUTF2    | P61970 | + | -3.63 | + | -3.50 | + | -3.97 | + | -3.51 |
| ALDH9A1  | P49189 | + | -3.63 | + | -3.17 | + | -4.70 | + | -3.27 |
| PSMC2    | P35998 | + | -3.65 | + | -3.85 | + | -4.20 | + | -3.20 |
| IDH1     | O75874 | + | -3.65 | + | -2.85 | + | -1.41 | + | -5.48 |
| TUBB2B   | Q9BVA1 | + | -3.65 | + | -3.81 | + | -1.71 | + | -4.73 |
| HSPB1    | P04792 | + | -3.65 | + | -2.18 | + | -4.07 | + | -4.29 |
| AGL      | P35573 | + | -3.65 | + | -3.22 | + | -4.18 | + | -3.60 |
| PPA1     | Q15181 | + | -3.66 | + | -3.66 | + | -2.05 | + | -4.62 |
| UCHL3    | P15374 | + | -3.67 | + | -3.72 | + | -3.95 | + | -3.48 |
| ACOT7    | O00154 | + | -3.68 | + | -3.25 | + | -1.39 | + | -5.30 |
| VAT1L    | Q9HCJ6 | + | -3.68 | + | -3.95 | + | -3.58 | + | -3.57 |
| PSMD3    | O43242 | + | -3.68 | + | -4.21 | + | -3.79 | + | -3.30 |
| GDI1     | P31150 | + | -3.71 | + | -4.79 | + | -2.76 | + | -3.63 |
| SRSF7    | Q16629 | + | -3.71 | + | -3.94 | + | -2.81 | + | -4.11 |
| ATP6V0D1 | P61421 | + | -3.73 | + | -2.84 | + | -2.14 | + | -5.21 |
| SEPT8    | Q92599 | + | -3.73 | + | -4.07 | + | -2.64 | + | -4.18 |
| CLASP2   | O75122 | + | -3.73 |   | -3.37 |   | -4.04 | + | -3.76 |
| COPS3    | Q9UNS2 | + | -3.74 | + | -3.33 | + | -4.08 | + | -3.79 |
| USO1     | O60763 | + | -3.75 | + | -3.13 | + | -4.03 | + | -3.95 |
| PAFAH1B1 | P43034 | + | -3.75 | + | -3.57 | + | -2.66 | + | -4.51 |
| NDUFV1   | P49821 | + | -3.75 | + | -3.68 | + | -3.44 | + | -3.99 |
| GMPR2    | Q9P2T1 | + | -3.76 | + | -3.52 | + | -3.62 | + | -3.99 |
| SEPT5    | Q99719 | + | -3.77 | + | -3.79 | + | -3.67 | + | -3.80 |

|         |            |   |       |   |       |   |       |   |       |
|---------|------------|---|-------|---|-------|---|-------|---|-------|
| GLG1    | Q92896     | + | -3.77 | + | -4.91 | + | -2.54 | + | -3.83 |
| PGD     | P52209     | + | -3.77 | + | -3.26 | + | -3.37 | + | -4.32 |
| SHMT2   | P34897     | + | -3.79 | + | -4.22 | + | -3.80 | + | -3.51 |
| HNRNPD  | Q14103     | + | -3.80 | + | -4.36 | + | -3.04 | + | -3.92 |
| KHSRP   | Q92945     | + | -3.80 | + | -3.47 | + | -3.70 | + | -4.06 |
| RPL23   | P62829     | + | -3.82 | + | -3.59 | + | -4.74 | + | -3.40 |
| SEPT7   | Q16181     | + | -3.83 | + | -2.12 | + | -2.31 | + | -5.76 |
| VPS29   | Q9UBQ0     | + | -3.86 | + | -5.04 | + | -2.22 | + | -4.13 |
| RPL11   | P62913     | + | -3.86 | + | -4.62 | + | -1.87 | + | -4.60 |
| TCHH    | Q07283     | + | -3.86 |   | -4.00 |   | -3.79 | + | -3.82 |
| INA     | Q16352     | + | -3.88 | + | -4.09 | + | -4.18 | + | -3.56 |
| CD36    | P16671     | + | -3.89 | + | -5.81 | + | 1.88  | + | -6.21 |
| ACADVL  | P49748     | + | -3.90 | + | -3.91 | + | -3.24 | + | -4.28 |
| PGM3    | O95394     | + | -3.92 | + | -4.09 | + | -3.83 | + | -3.88 |
| PMEL    | P40967     | + | -3.93 |   | -0.86 |   | -1.32 | + | -7.33 |
| RPL12   | P30050     | + | -3.95 | + | -4.93 | + | -3.31 | + | -3.73 |
| BGN     | P21810     | + | -3.96 | + | -3.74 | + | -3.88 | + | -4.15 |
| DDX17   | Q92841     | + | -4.00 | + | -4.09 | + | -4.75 | + | -3.48 |
| SCFD1   | Q8WVM<br>8 | + | -4.01 | + | -4.37 | + | -3.68 | + | -3.99 |
| RPS16   | P62249     | + | -4.01 | + | -6.19 | + | -4.58 | + | -2.37 |
| EPHX1   | P07099     | + | -4.01 |   | -0.94 | + | -4.36 | + | -5.64 |
| GNAO1   | P09471     | + | -4.01 | + | -1.57 | + | -2.54 | + | -6.36 |
| MAT2A   | P31153     | + | -4.01 | + | -4.72 | + | -2.29 | + | -4.63 |
| AK1     | P00568     | + | -4.06 | + | -4.95 | + | -2.45 | + | -4.49 |
| HADHB   | P55084     | + | -4.07 | + | -4.04 | + | -3.94 | + | -4.16 |
| ARCN1   | P48444     | + | -4.08 | + | -4.04 | + | -3.56 | + | -4.42 |
| DYNC1I2 | Q13409     | + | -4.10 | + | -4.45 | + | -3.89 | + | -4.02 |
| HSP90B1 | P14625     | + | -4.13 | + | -5.71 | + | -3.19 | + | -3.76 |
| PRPS1   | P60891     | + | -4.14 | + | -4.96 | + | -3.41 | + | -4.08 |
| SYT1    | P21579     | + | -4.15 | + | -5.07 | + | -3.74 | + | -3.84 |
| TAGLN   | Q01995     | + | -4.15 | + | -4.47 | + | -3.27 | + | -4.49 |
| COPS4   | Q9BT78     | + | -4.17 | + | -3.88 | + | -4.41 | + | -4.21 |
| GSTM5   | P46439     | + | -4.18 | + | -4.42 | + | -4.17 | + | -4.04 |
| IDH3A   | P50213     | + | -4.18 | + | -3.81 | + | -4.14 | + | -4.42 |



|          |        |   |       |   |       |   |       |   |       |
|----------|--------|---|-------|---|-------|---|-------|---|-------|
| TKT      | P29401 | + | -4.20 | + | -5.61 | + | -2.16 | + | -4.58 |
| SLC16A6  | O15403 | + | -4.20 | + | -5.52 |   | -0.42 | + | -5.68 |
| SUCLG1   | P53597 | + | -4.21 | + | -4.13 | + | -4.36 | + | -4.16 |
| GNB3     | P16520 | + | -4.21 | + | -4.44 | + | -3.97 | + | -4.22 |
| PDHB     | P11177 | + | -4.21 | + | -4.23 | + | -3.74 | + | -4.48 |
| LGI3     | Q8N145 | + | -4.23 | + | -4.03 | + | -4.01 | + | -4.47 |
| RBBP4    | Q09028 | + | -4.23 | + | -4.10 | + | -4.03 | + | -4.43 |
| FH       | P07954 | + | -4.24 | + | -4.35 | + | -3.88 | + | -4.40 |
| VARS     | P26640 | + | -4.29 | + | -3.39 | + | -3.57 | + | -5.27 |
| SCRN1    | Q12765 | + | -4.30 | + | -4.79 | + | -3.04 | + | -4.76 |
| CMAS     | Q8NFW8 | + | -4.30 | + | -3.71 | + | -4.21 | + | -4.72 |
| HSPA2    | P54652 | + | -4.30 | + | -6.76 | + | 0.55  | + | -5.75 |
| COPG1    | Q9Y678 | + | -4.32 | + | -4.61 | + | -4.39 | + | -4.10 |
| COPS2    | P61201 | + | -4.36 | + | -5.15 | + | -4.01 | + | -4.11 |
| CRYZ     | Q08257 | + | -4.37 | + | -3.50 | + | -5.06 | + | -4.47 |
| IVD      | P26440 | + | -4.39 | + | -4.65 | + | -4.48 | + | -4.19 |
| PRMT1    | Q99873 | + | -4.40 | + | -5.44 | + | -4.38 | + | -3.79 |
| RTCB     | Q9Y310 | + | -4.40 | + | -3.76 | + | -2.29 | + | -6.06 |
| ACTR1A   | P61163 | + | -4.48 | + | -5.27 | + | -5.17 | + | -3.60 |
| ADH5     | P11766 | + | -4.51 | + | -3.85 | + | -4.41 | + | -4.96 |
| MAPK3    | P27361 | + | -4.53 | + | -4.64 | + | -4.11 | + | -4.71 |
| HNRNPA1  | P09651 | + | -4.61 | + | -6.19 | + | -4.72 | + | -3.60 |
| PGM1     | P36871 | + | -4.61 | + | -3.60 | + | -4.55 | + | -5.26 |
| COPA     | P53621 | + | -4.63 | + | -5.01 | + | -4.52 | + | -4.47 |
| CTBP1    | Q13363 | + | -4.65 | + | -4.54 | + | -4.24 | + | -4.96 |
| ARL3     | P36405 | + | -4.65 | + | -4.66 | + | -5.02 | + | -4.43 |
| KIAA1324 | Q6UXG2 | + | -4.72 | + | -4.80 | + | -4.32 | + | -4.91 |
| MAP1B    | P46821 | + | -4.73 | + | -4.92 | + | -4.91 | + | -4.51 |
| FARSB    | Q9NSD9 | + | -4.74 | + | -5.76 | + | -5.02 | + | -3.96 |
| TARS     | P26639 | + | -4.74 | + | -5.69 | + | -4.94 | + | -4.05 |
| PPID     | Q08752 | + | -4.75 | + | -4.73 | + | -4.66 | + | -4.81 |
| SUCLA2   | Q9P2R7 | + | -4.78 | + | -4.77 | + | -4.36 | + | -5.03 |
| HPRT1    | P00492 | + | -4.80 | + | -5.24 | + | -4.38 | + | -4.80 |
| ATP6V0A1 | Q93050 | + | -4.81 | + | -4.10 | + | -3.59 | + | -5.97 |
| GMPPA    | Q96IJ6 | + | -4.83 | + | -3.91 | + | -5.09 | + | -5.23 |

|          |        |   |       |   |       |   |       |   |       |
|----------|--------|---|-------|---|-------|---|-------|---|-------|
| TKFC     | Q3LXA3 | + | -4.89 | + | -5.05 | + | -4.32 | + | -5.14 |
| CAND1    | Q86VP6 | + | -4.90 | + | -5.74 | + | -3.25 | + | -5.39 |
| GBE1     | Q04446 | + | -4.96 | + | -4.54 | + | -5.13 | + | -5.11 |
| PAFAH1B3 | Q15102 | + | -4.98 | + | -5.67 | + | -3.36 | + | -5.53 |
| CTSK     | P43235 | + | -5.00 | + | -5.42 | + | -4.42 | + | -5.09 |
| NEFL     | P07196 | + | -5.03 | + | -5.39 | + | -5.08 | + | -4.80 |
| OXCT1    | P55809 | + | -5.07 | + | -5.29 | + | -4.48 | + | -5.30 |
| GOT2     | P00505 | + | -5.08 | + | -5.15 | + | -5.67 | + | -4.69 |
| PDHA1    | P08559 | + | -5.12 | + | -4.97 | + | -5.39 | + | -5.06 |
| LAP3     | P28838 | + | -5.16 | + | -5.18 | + | -3.85 | + | -5.94 |
| TYR      | P14679 | + | -5.17 | + | -5.13 | + | -5.48 | + | -5.00 |
| IDH2     | P48735 | + | -5.17 | + | -5.99 | + | -4.72 | + | -4.95 |
| CS       | O75390 | + | -5.23 | + | -5.19 | + | -5.42 | + | -5.15 |
| GPM6A    | P51674 | + | -5.25 | + | -4.87 | + | -5.63 | + | -5.24 |
| STXBP1   | P61764 | + | -5.42 | + | -5.36 | + | -2.80 | + | -7.04 |
| ATP1A3   | P13637 | + | -5.43 | + | -5.70 | + | -5.58 | + | -5.17 |
| ALDH1A2  | O94788 | + | -5.43 | + | -5.93 | + | -4.83 | + | -5.48 |
| PGAM4    | Q8N0Y7 | + | -5.44 | + | -5.42 | + | -5.24 | + | -5.56 |
| NANS     | Q9NR45 | + | -5.47 | + | -4.80 | + | -5.77 | + | -5.68 |
| DLD      | P09622 | + | -5.52 | + | -5.37 | + | -5.13 | + | -5.86 |
| LTA4H    | P09960 | + | -5.61 | + | -5.92 | + | -4.18 | + | -6.27 |
| ATP6V1B2 | P21281 | + | -5.62 | + | -4.56 | + | -3.61 | + | -7.46 |
| SELENBP1 | Q13228 | + | -5.64 | + | -5.79 | + | -6.17 | + | -5.23 |
| RAB3A    | P20336 | + | -5.71 | + | -6.32 | + | -5.38 | + | -5.53 |
| GLUD2    | P49448 | + | -5.88 | + | -5.39 | + | -6.46 | + | -5.83 |
| CADPS    | Q9ULU8 | + | -5.97 | + | -6.28 | + | -5.70 | + | -5.95 |
| OGDH     | Q02218 | + | -6.03 | + | -6.54 | + | -5.78 | + | -5.88 |
| CKB      | P12277 | + | -6.05 | + | -6.87 | + | -5.50 | + | -5.89 |
| RPS3     | P23396 | + | -6.07 | + | -7.36 | + | -6.87 | + | -4.81 |
| DLAT     | P10515 | + | -6.09 | + | -5.96 | + | -6.36 | + | -6.01 |
| HYOU1    | Q9Y4L1 | + | -6.26 | + | -6.56 | + | -5.98 | + | -6.25 |
| CNN1     | P51911 | + | -6.27 | + | -6.42 | + | -6.12 | + | -6.26 |
| TYRP1    | P17643 | + | -6.37 | + | -4.01 | + | -6.49 | + | -7.72 |
| MDH2     | P40926 | + | -6.46 | + | -6.20 | + | -6.50 | + | -6.60 |
| CRMP1    | Q14194 | + | -6.55 | + | -6.64 | + | -6.68 | + | -6.41 |

|         |        |   |       |   |        |   |       |   |       |
|---------|--------|---|-------|---|--------|---|-------|---|-------|
| ATP6V1A | P38606 | + | -6.57 | + | -5.62  | + | -5.08 | + | -8.03 |
| CUL4B   | Q13620 | + | -6.73 | + | -6.73  | + | -6.20 | + | -7.04 |
| NPEPPS  | P55786 | + | -6.73 | + | -6.41  | + | -6.28 | + | -7.20 |
| ALDH2   | P05091 | + | -6.79 | + | -7.44  | + | -6.49 | + | -6.59 |
| FBN1    | P35555 | + | -6.89 | + | -6.55  | + | -7.14 | + | -6.94 |
| ACTBL2  | Q562R1 | + | -6.92 | + | -8.23  | + | -7.54 | + | -5.75 |
| PGM2    | Q96G03 | + | -6.96 | + | -7.22  | + | -7.22 | + | -6.65 |
| DPP4    | P27487 | + | -7.02 | + | -7.59  | + | -7.20 | + | -6.57 |
| ATP5F1A | P25705 | + | -7.10 | + | -8.12  | + | -7.78 | + | -6.08 |
| EEF1A2  | Q05639 | + | -7.17 | + | -6.80  | + | -7.81 | + | -7.01 |
| DPYSL3  | Q14195 | + | -7.55 | + | -7.69  | + | -7.48 | + | -7.50 |
| ACO2    | Q99798 | + | -7.68 | + | -6.96  | + | -8.23 | + | -7.78 |
| ATP5F1B | P06576 | + | -7.77 | + | -9.79  | + | -8.51 | + | -6.11 |
| IGSF1   | Q8N6C5 | + | -8.62 | + | -8.32  | + | -8.95 | + | -8.61 |
| UCHL1   | P09936 | + | -9.06 | + | -9.16  | + | -8.46 | + | -9.37 |
| ALDH1A1 | P00352 | + | -9.24 | + | -10.03 | + | -7.66 | + | -9.71 |
| DPYSL2  | Q16555 | + | -9.66 | + | -10.44 | + | -9.46 | + | -9.31 |
