# Supplementary material for: Use of extracellular vesicles from lymphatic drainage as surrogate markers of melanoma progression and BRAFV600E mutation
Source: PubMed Central journal article supplement — J Exp Med. 2019 Apr 11;216(5):1061–70. doi: 10.1084/jem.20181522 (PMC6504207; doi:10.1084/jem.20181522), 2019-04-11
Supplement: JEM_20181522_TableS7.pdf [file JEM_20181522_TableS7.pdf]

**Table S7. Proteins found in melanoma patient seroma-derived exosomes**

| ID protein | Gene names | N1a   | N1b   | N2a   | N2b   | N3    |
|------------|------------|-------|-------|-------|-------|-------|
| P04217     | A1BG       | 20.57 | 20.35 | 21.36 | 21.35 | 20.93 |
| P01023     | A2M        | 30.33 | 30.05 | 30.21 | 30.35 | 29.87 |
| Q8IZP0     | ABI1       | 17.04 | 16.19 | 17.63 | 16.36 | 16.74 |
| Q7Z7G0     | ABI3BP     | 15.95 | 16.72 | 16.89 | 17.22 | 15.85 |
| P09110     | ACAA1      | 15.92 | 15.77 | 18.27 | 17.17 | 17.44 |
| P53396     | ACLY       | 15.97 | 15.41 | 18.03 | 18.55 | 17.86 |
| P21399     | ACO1       | 15.55 | 15.70 | 15.64 | 16.99 | 15.91 |
| Q15067     | ACOX1      | 16.49 | 16.49 | 18.45 | 17.69 | 16.68 |
| P33121     | ACSL1      | 19.37 | 20.18 | 20.12 | 20.95 | 19.92 |
| O95573     | ACSL3      | 15.45 | 15.50 | 16.05 | 15.74 | 15.85 |
| O60488     | ACSL4      | 15.77 | 16.02 | 17.17 | 15.26 | 16.40 |
| P60709     | ACTB       | 24.86 | 24.95 | 25.12 | 24.87 | 25.09 |
| P68032     | ACTC1      | 27.05 | 26.93 | 26.39 | 26.48 | 26.89 |
| P12814     | ACTN1      | 19.50 | 18.21 | 19.66 | 19.80 | 17.85 |
| P35609     | ACTN2      | 19.41 | 16.85 | 19.27 | 18.37 | 19.05 |
| Q08043     | ACTN3      | 17.03 | 16.27 | 17.35 | 17.54 | 15.92 |
| O43707     | ACTN4      | 18.17 | 16.18 | 19.16 | 18.10 | 18.01 |
| P61163     | ACTR1A     | 16.30 | 15.99 | 16.51 | 17.28 | 17.47 |
| P61160     | ACTR2      | 16.32 | 17.35 | 18.69 | 17.52 | 17.38 |
| P61158     | ACTR3      | 18.19 | 16.88 | 18.49 | 18.80 | 17.91 |
| O14672     | ADAM10     | 19.08 | 17.94 | 18.64 | 18.23 | 18.46 |
| P35611     | ADD1       | 17.08 | 15.49 | 17.19 | 17.53 | 15.65 |
| P00325     | ADH1B      | 19.49 | 19.02 | 21.83 | 22.62 | 20.07 |
| Q15848     | ADIPOQ     | 15.92 | 15.88 | 17.15 | 15.72 | 15.94 |
| Q9BRR6     | ADPGK      | 16.43 | 16.83 | 17.63 | 16.81 | 15.02 |
| P43652     | AFM        | 16.10 | 15.81 | 17.82 | 17.24 | 18.06 |
| P35573     | AGL        | 16.05 | 16.84 | 15.77 | 15.95 | 15.95 |

|        |          |       |       |       |       |       |
|--------|----------|-------|-------|-------|-------|-------|
| O15120 | AGPAT2   | 16.00 | 16.36 | 16.21 | 16.76 | 15.97 |
| Q53EU6 | AGPAT9   | 16.11 | 15.74 | 16.74 | 15.63 | 16.32 |
| O00116 | AGPS     | 16.28 | 15.50 | 18.09 | 17.25 | 15.75 |
| P01019 | AGT      | 20.29 | 18.77 | 19.85 | 19.03 | 19.83 |
| P23526 | AHCY     | 15.70 | 15.65 | 15.66 | 15.64 | 17.64 |
| Q09666 | AHNAK    | 20.30 | 19.85 | 22.72 | 21.95 | 19.04 |
| P02765 | AHSG     | 23.75 | 22.41 | 22.94 | 24.52 | 23.93 |
| P00568 | AK1      | 16.34 | 15.42 | 17.17 | 17.87 | 16.47 |
| P54819 | AK2      | 15.93 | 15.57 | 16.26 | 16.21 | 15.84 |
| Q04828 | AKR1C1   | 16.47 | 17.32 | 18.36 | 18.73 | 15.84 |
| P02768 | ALB      | 30.32 | 30.38 | 30.08 | 30.30 | 30.50 |
| Q8IZ83 | ALDH16A1 | 16.80 | 16.04 | 17.18 | 17.74 | 16.24 |
| P00352 | ALDH1A1  | 16.09 | 16.12 | 17.63 | 17.61 | 16.40 |
| P05091 | ALDH2    | 16.58 | 16.15 | 17.27 | 18.00 | 15.50 |
| P51648 | ALDH3A2  | 15.86 | 15.49 | 16.73 | 16.79 | 15.75 |
| P43353 | ALDH3B1  | 16.14 | 16.33 | 17.96 | 16.31 | 15.15 |
| P04075 | ALDOA    | 21.12 | 20.41 | 22.05 | 20.25 | 21.48 |
| Q9Y673 | ALG5     | 15.43 | 16.16 | 16.25 | 15.74 | 15.29 |
| P09917 | ALOX5    | 20.34 | 19.95 | 20.45 | 19.95 | 19.83 |
| P20292 | ALOX5AP  | 17.87 | 19.80 | 22.35 | 18.49 | 15.67 |
| P05186 | ALPL     | 16.24 | 17.73 | 18.57 | 16.77 | 16.36 |
| P02760 | AMBP     | 23.62 | 24.11 | 22.74 | 23.50 | 23.98 |
| Q01432 | AMPD3    | 16.20 | 15.89 | 16.71 | 16.22 | 17.49 |
| P03950 | ANG      | 15.88 | 15.94 | 15.64 | 16.26 | 16.78 |
| P16157 | ANK1     | 21.84 | 21.37 | 22.24 | 21.89 | 20.77 |
| Q5VYY1 | ANKRD22  | 16.56 | 15.90 | 17.66 | 16.77 | 16.51 |
| Q9NW15 | ANO10    | 17.15 | 16.56 | 18.70 | 17.30 | 16.65 |
| Q4KMQ2 | ANO6     | 15.65 | 15.69 | 17.23 | 16.18 | 16.12 |
| P39687 | ANP32A   | 18.79 | 16.76 | 15.95 | 17.77 | 18.20 |
| Q92688 | ANP32B   | 17.67 | 16.08 | 15.19 | 17.46 | 17.19 |

|        |         |       |       |       |       |       |
|--------|---------|-------|-------|-------|-------|-------|
| Q9BTT0 | ANP32E  | 17.55 | 15.68 | 15.82 | 17.08 | 15.28 |
| P15144 | ANPEP   | 21.42 | 21.58 | 22.57 | 22.12 | 21.52 |
| P58335 | ANTXR2  | 15.69 | 15.97 | 16.14 | 16.07 | 15.04 |
| P04083 | ANXA1   | 25.38 | 25.23 | 24.70 | 25.06 | 24.85 |
| P50995 | ANXA11  | 22.80 | 22.63 | 22.55 | 22.50 | 22.33 |
| P07355 | ANXA2   | 24.78 | 25.01 | 25.20 | 25.46 | 24.66 |
| P12429 | ANXA3   | 24.61 | 24.62 | 24.45 | 24.48 | 24.56 |
| P09525 | ANXA4   | 21.82 | 21.62 | 22.11 | 21.86 | 21.33 |
| P08758 | ANXA5   | 23.45 | 23.56 | 23.29 | 23.84 | 22.74 |
| P08133 | ANXA6   | 24.56 | 24.61 | 24.37 | 24.55 | 24.22 |
| P20073 | ANXA7   | 21.05 | 20.72 | 20.27 | 20.29 | 19.92 |
| Q16853 | AOC3    | 22.98 | 23.56 | 23.26 | 24.44 | 23.27 |
| O95782 | AP2A1   | 15.95 | 16.41 | 16.43 | 16.93 | 15.98 |
| P63010 | AP2B1   | 16.34 | 15.45 | 16.83 | 16.74 | 15.54 |
| Q7Z5R6 | APBB1IP | 16.39 | 15.51 | 16.82 | 15.96 | 16.46 |
| P02743 | APCS    | 26.83 | 26.85 | 20.77 | 24.13 | 24.95 |
| Q9HDC9 | APMAP   | 22.76 | 22.81 | 23.07 | 22.37 | 22.93 |
| P02647 | APOA1   | 27.16 | 26.76 | 26.59 | 26.87 | 27.38 |
| P02652 | APOA2   | 22.25 | 21.58 | 20.86 | 21.34 | 18.85 |
| P06727 | APOA4   | 21.90 | 21.22 | 22.96 | 22.28 | 24.06 |
| P04114 | APOB    | 22.04 | 21.51 | 22.38 | 21.65 | 22.59 |
| P02654 | APOC1   | 22.75 | 23.11 | 22.46 | 22.64 | 22.57 |
| P02655 | APOC2   | 16.82 | 19.02 | 17.12 | 18.66 | 18.66 |
| P02656 | APOC3   | 18.50 | 18.97 | 16.87 | 20.63 | 19.52 |
| P05090 | APOD    | 21.79 | 22.02 | 22.32 | 22.14 | 22.26 |
| P02649 | APOE    | 21.92 | 22.30 | 22.33 | 21.88 | 23.74 |
| Q13790 | APOF    | 15.86 | 16.22 | 18.35 | 16.98 | 18.03 |
| P02749 | APOH    | 23.64 | 24.44 | 24.74 | 24.40 | 24.35 |
| O14791 | APOL1   | 22.17 | 21.36 | 21.95 | 20.83 | 21.82 |
| O95445 | APOM    | 16.48 | 16.23 | 15.73 | 15.43 | 17.21 |

|        |          |       |       |       |       |       |
|--------|----------|-------|-------|-------|-------|-------|
| P07741 | APRT     | 15.98 | 16.36 | 16.34 | 16.52 | 16.24 |
| P84077 | ARF1     | 20.81 | 20.88 | 21.39 | 20.84 | 20.78 |
| P18085 | ARF4     | 15.88 | 16.47 | 16.51 | 16.21 | 15.60 |
| P62330 | ARF6     | 15.78 | 16.50 | 17.02 | 15.01 | 15.67 |
| P05089 | ARG1     | 15.61 | 16.59 | 16.75 | 17.09 | 16.45 |
| Q07960 | ARHGAP1  | 16.08 | 15.81 | 15.89 | 16.34 | 15.57 |
| Q9BRR9 | ARHGAP9  | 15.63 | 16.19 | 16.00 | 15.23 | 15.61 |
| P52565 | ARHGDI A | 17.13 | 16.37 | 19.17 | 18.05 | 16.41 |
| P52566 | ARHGDI B | 20.94 | 20.96 | 21.29 | 20.90 | 20.58 |
| Q92974 | ARHGEF2  | 15.24 | 15.94 | 15.63 | 16.26 | 15.48 |
| O75915 | ARL6IP5  | 17.42 | 16.82 | 20.49 | 17.69 | 17.86 |
| Q9NVJ2 | ARL8B    | 15.01 | 16.50 | 16.63 | 16.35 | 15.55 |
| O15143 | ARPC1B   | 15.76 | 15.80 | 16.92 | 17.42 | 16.80 |
| O15144 | ARPC2    | 16.73 | 16.01 | 18.02 | 17.48 | 16.91 |
| O15145 | ARPC3    | 17.12 | 15.22 | 18.24 | 17.65 | 17.82 |
| P59998 | ARPC4    | 16.89 | 17.69 | 17.50 | 16.83 | 17.26 |
| O15511 | ARPC5    | 15.47 | 16.67 | 18.62 | 17.65 | 17.43 |
| Q13510 | ASAH1    | 15.97 | 16.66 | 16.83 | 16.25 | 15.65 |
| Q12797 | ASPH     | 16.16 | 15.66 | 17.04 | 17.99 | 15.94 |
| Q9BXN1 | ASPN     | 18.25 | 19.20 | 18.31 | 18.55 | 19.07 |
| P31939 | ATIC     | 15.69 | 15.40 | 15.57 | 15.69 | 15.72 |
| Q6DD88 | ATL3     | 17.96 | 18.10 | 19.87 | 19.33 | 17.31 |
| P98196 | ATP11A   | 15.33 | 16.10 | 16.17 | 15.64 | 15.38 |
| Q9Y2G3 | ATP11B   | 15.86 | 15.90 | 16.87 | 16.14 | 16.06 |
| P05023 | ATP1A1   | 18.67 | 18.28 | 20.83 | 19.14 | 17.76 |
| P54709 | ATP1B3   | 15.77 | 15.80 | 18.66 | 17.29 | 16.80 |
| O14983 | ATP2A1   | 22.04 | 20.89 | 21.23 | 18.13 | 20.83 |
| P16615 | ATP2A2   | 17.09 | 15.64 | 16.24 | 16.95 | 15.99 |
| Q93084 | ATP2A3   | 19.81 | 19.11 | 20.24 | 18.33 | 19.37 |
| P23634 | ATP2B4   | 16.59 | 15.59 | 19.49 | 17.52 | 16.29 |

|        |          |       |       |       |       |       |
|--------|----------|-------|-------|-------|-------|-------|
| P25705 | ATP5A1   | 16.04 | 15.17 | 18.32 | 17.71 | 17.09 |
| P06576 | ATP5B    | 17.21 | 16.08 | 19.72 | 18.38 | 17.15 |
| P56134 | ATP5J2   | 16.06 | 15.83 | 16.37 | 15.03 | 16.07 |
| Q93050 | ATP6V0A1 | 16.72 | 16.11 | 17.77 | 16.24 | 17.15 |
| P38606 | ATP6V1A  | 16.88 | 15.87 | 17.80 | 17.20 | 16.89 |
| P21281 | ATP6V1B2 | 15.53 | 16.65 | 16.32 | 15.71 | 15.38 |
| O75348 | ATP6V1G1 | 15.32 | 15.72 | 16.41 | 16.46 | 16.02 |
| P25311 | AZGP1    | 17.45 | 17.55 | 19.00 | 17.69 | 18.09 |
| P20160 | AZU1     | 23.37 | 24.05 | 21.40 | 22.92 | 22.90 |
| P61769 | B2M      | 17.88 | 16.04 | 21.69 | 20.83 | 18.94 |
| O75531 | BANF1    | 17.55 | 17.60 | 18.97 | 17.82 | 18.63 |
| P80723 | BASP1    | 21.88 | 22.51 | 21.83 | 21.67 | 21.78 |
| P51572 | BCAP31   | 20.35 | 20.60 | 20.82 | 20.27 | 19.26 |
| P06276 | BCHE     | 16.30 | 16.07 | 17.29 | 15.17 | 17.28 |
| P21810 | BGN      | 18.59 | 18.03 | 19.04 | 18.22 | 18.26 |
| Q9UBW5 | BIN2     | 16.91 | 16.07 | 15.68 | 16.79 | 15.33 |
| P53004 | BLVRA    | 15.79 | 16.33 | 15.83 | 16.68 | 15.40 |
| P30043 | BLVRB    | 21.10 | 21.66 | 20.85 | 21.58 | 21.73 |
| P17213 | BPI      | 19.87 | 20.40 | 20.65 | 18.61 | 18.89 |
| P35613 | BSG      | 18.79 | 18.34 | 18.89 | 19.06 | 17.02 |
| Q10588 | BST1     | 20.53 | 20.43 | 20.45 | 20.96 | 21.24 |
| Q9H7M9 | C10orf54 | 17.89 | 15.75 | 20.02 | 18.26 | 16.68 |
| Q9BQA9 | C17orf62 | 15.69 | 16.34 | 16.31 | 15.60 | 16.36 |
| P02745 | C1QA     | 24.86 | 25.42 | 23.24 | 23.85 | 23.91 |
| P02746 | C1QB     | 25.60 | 25.99 | 23.43 | 24.38 | 24.61 |
| P02747 | C1QC     | 25.45 | 26.28 | 23.47 | 24.30 | 24.95 |
| P00736 | C1R      | 26.21 | 26.52 | 23.06 | 24.56 | 25.43 |
| P09871 | C1S      | 26.05 | 26.19 | 20.25 | 23.08 | 24.19 |
| P06681 | C2       | 16.38 | 15.75 | 18.13 | 17.80 | 17.05 |
| P01024 | C3       | 28.67 | 28.62 | 27.86 | 28.43 | 28.70 |

|        |        |       |       |       |       |       |
|--------|--------|-------|-------|-------|-------|-------|
| P0C0L4 | C4A    | 23.25 | 22.65 | 22.21 | 22.11 | 23.48 |
| P0C0L5 | C4B    | 27.70 | 27.65 | 26.46 | 27.08 | 27.46 |
| P04003 | C4BPA  | 27.67 | 27.81 | 25.44 | 26.67 | 26.60 |
| P20851 | C4BPB  | 23.31 | 23.29 | 21.63 | 22.38 | 22.08 |
| P01031 | C5     | 25.35 | 25.77 | 25.01 | 25.23 | 25.61 |
| P21730 | C5AR1  | 20.47 | 20.44 | 21.15 | 20.42 | 19.00 |
| P13671 | C6     | 22.79 | 23.20 | 22.82 | 22.86 | 23.01 |
| P10643 | C7     | 22.90 | 23.31 | 22.43 | 22.93 | 22.97 |
| P07357 | C8A    | 23.22 | 23.66 | 22.01 | 22.83 | 22.99 |
| P07358 | C8B    | 22.98 | 23.82 | 22.04 | 22.88 | 23.09 |
| P07360 | C8G    | 21.32 | 22.35 | 20.94 | 20.76 | 22.24 |
| P02748 | C9     | 25.14 | 25.74 | 24.86 | 25.20 | 25.24 |
| P00915 | CA1    | 22.01 | 22.65 | 22.07 | 21.53 | 22.95 |
| P00918 | CA2    | 18.06 | 17.82 | 18.97 | 18.15 | 19.91 |
| P07451 | CA3    | 17.34 | 15.69 | 16.00 | 16.12 | 16.19 |
| P22748 | CA4    | 18.89 | 18.21 | 19.86 | 19.40 | 17.94 |
| P27708 | CAD    | 15.62 | 16.68 | 17.18 | 16.03 | 15.47 |
| P62158 | CALM1  | 20.98 | 21.17 | 20.58 | 20.44 | 19.38 |
| P27797 | CALR   | 23.53 | 23.46 | 24.29 | 23.33 | 23.72 |
| Q13555 | CAMK2G | 15.79 | 16.65 | 16.44 | 16.37 | 16.30 |
| P49913 | CAMP   | 22.45 | 22.89 | 23.35 | 22.19 | 21.68 |
| Q86VP6 | CAND1  | 16.65 | 16.50 | 16.92 | 16.57 | 15.49 |
| P27824 | CANX   | 23.41 | 23.57 | 23.69 | 23.11 | 23.20 |
| Q01518 | CAP1   | 19.92 | 19.04 | 20.35 | 19.95 | 19.74 |
| P40121 | CAPG   | 15.79 | 16.12 | 17.35 | 16.58 | 15.78 |
| P07384 | CAPN1  | 16.74 | 16.18 | 18.31 | 16.99 | 17.31 |
| P17655 | CAPN2  | 14.92 | 15.97 | 16.13 | 16.64 | 16.19 |
| P52907 | CAPZA1 | 17.65 | 17.94 | 19.64 | 18.70 | 18.30 |
| P47756 | CAPZB  | 17.05 | 16.07 | 18.22 | 17.83 | 17.12 |
| P31415 | CASQ1  | 21.67 | 18.53 | 17.78 | 16.48 | 22.88 |

|        |         |       |       |       |       |       |
|--------|---------|-------|-------|-------|-------|-------|
| P04040 | CAT     | 23.66 | 23.85 | 23.05 | 23.90 | 22.86 |
| Q03135 | CAV1    | 19.69 | 20.27 | 21.77 | 23.51 | 19.69 |
| P51636 | CAV2    | 16.18 | 16.22 | 17.13 | 19.17 | 18.94 |
| Q8NDH2 | CCDC168 | 15.85 | 16.37 | 15.98 | 16.62 | 16.77 |
| P78371 | CCT2    | 16.86 | 16.10 | 17.73 | 17.29 | 17.07 |
| P49368 | CCT3    | 16.57 | 16.57 | 17.38 | 17.38 | 17.48 |
| P50991 | CCT4    | 15.46 | 15.96 | 16.01 | 17.36 | 15.56 |
| P48643 | CCT5    | 17.83 | 15.99 | 18.33 | 17.60 | 17.57 |
| P40227 | CCT6A   | 17.81 | 17.41 | 17.20 | 17.03 | 16.07 |
| P50990 | CCT8    | 18.30 | 17.06 | 18.05 | 17.97 | 16.23 |
| Q93033 | CD101   | 16.46 | 15.90 | 18.92 | 16.90 | 15.91 |
| P08571 | CD14    | 18.56 | 17.21 | 21.42 | 17.67 | 17.31 |
| Q8N6Q3 | CD177   | 18.13 | 17.82 | 19.17 | 17.10 | 17.97 |
| P16671 | CD36    | 21.98 | 22.04 | 22.10 | 22.76 | 21.16 |
| P16070 | CD44    | 20.27 | 20.44 | 21.34 | 20.90 | 20.36 |
| Q08722 | CD47    | 20.23 | 17.05 | 20.25 | 18.94 | 19.63 |
| P09326 | CD48    | 15.73 | 15.85 | 18.28 | 16.52 | 15.59 |
| P08174 | CD55    | 16.23 | 17.19 | 18.12 | 15.71 | 15.25 |
| P13987 | CD59    | 21.06 | 21.55 | 20.47 | 19.20 | 21.19 |
| O43866 | CD5L    | 26.49 | 25.88 | 24.34 | 24.78 | 25.14 |
| P60033 | CD81    | 18.01 | 20.08 | 18.96 | 20.30 | 19.23 |
| P27701 | CD82    | 15.90 | 16.06 | 19.06 | 17.37 | 16.44 |
| P21926 | CD9     | 20.94 | 20.31 | 20.96 | 19.66 | 20.34 |
| Q9NPY3 | CD93    | 15.28 | 15.97 | 17.43 | 16.13 | 15.68 |
| P48960 | CD97    | 18.73 | 18.00 | 19.58 | 18.41 | 17.74 |
| P32320 | CDA     | 15.67 | 16.38 | 16.01 | 16.29 | 16.62 |
| P60953 | CDC42   | 19.45 | 20.31 | 19.43 | 19.20 | 19.12 |
| Q99459 | CDC5L   | 18.10 | 15.64 | 20.22 | 18.42 | 17.12 |
| P13688 | CEACAM1 | 19.30 | 18.37 | 20.97 | 18.72 | 19.94 |
| P31997 | CEACAM8 | 17.31 | 16.34 | 19.49 | 17.51 | 16.88 |

|        |         |       |       |       |       |       |
|--------|---------|-------|-------|-------|-------|-------|
| P23141 | CES1    | 18.36 | 19.43 | 20.08 | 21.58 | 18.54 |
| P11597 | CETP    | 16.80 | 16.43 | 17.80 | 17.17 | 15.89 |
| P00751 | CFB     | 22.33 | 22.28 | 22.79 | 22.74 | 23.11 |
| P00746 | CFD     | 18.62 | 19.43 | 18.63 | 17.72 | 19.66 |
| P08603 | CFH     | 25.81 | 26.06 | 25.06 | 25.70 | 25.93 |
| Q03591 | CFHR1   | 22.89 | 22.63 | 21.58 | 21.65 | 18.11 |
| P36980 | CFHR2   | 17.58 | 16.39 | 16.45 | 15.58 | 15.67 |
| Q9BXR6 | CFHR5   | 16.47 | 15.40 | 16.31 | 16.95 | 15.98 |
| P05156 | CFI     | 21.03 | 20.57 | 19.83 | 20.50 | 20.05 |
| P23528 | CFL1    | 22.18 | 21.86 | 22.21 | 21.95 | 22.03 |
| P27918 | CFP     | 18.64 | 18.23 | 17.68 | 17.87 | 16.61 |
| P36222 | CHI3L1  | 15.61 | 16.30 | 17.37 | 17.57 | 15.80 |
| Q13231 | CHIT1   | 15.86 | 16.20 | 16.99 | 17.63 | 16.30 |
| Q99653 | CHP1    | 17.19 | 17.04 | 16.01 | 15.42 | 16.44 |
| Q99828 | CIB1    | 15.69 | 16.04 | 16.12 | 15.98 | 16.02 |
| Q07065 | CKAP4   | 17.23 | 17.29 | 19.46 | 18.05 | 17.51 |
| P12277 | CKB     | 16.24 | 15.30 | 15.57 | 17.40 | 15.60 |
| P06732 | CKM     | 19.14 | 16.34 | 19.40 | 18.18 | 19.35 |
| Q5QGZ9 | CLEC12A | 15.52 | 15.77 | 17.73 | 16.10 | 16.03 |
| P05452 | CLEC3B  | 19.25 | 19.10 | 18.53 | 19.45 | 19.22 |
| Q9NY25 | CLEC5A  | 15.39 | 16.00 | 16.58 | 14.37 | 16.29 |
| O00299 | CLIC1   | 20.24 | 20.47 | 20.72 | 20.55 | 20.67 |
| P09496 | CLTA    | 15.56 | 16.56 | 15.73 | 17.58 | 15.11 |
| Q00610 | CLTC    | 21.65 | 20.57 | 22.04 | 21.80 | 21.57 |
| P10909 | CLU     | 27.07 | 26.99 | 26.59 | 26.57 | 27.56 |
| Q96KP4 | CNDP2   | 15.88 | 16.48 | 15.89 | 15.44 | 17.72 |
| Q99439 | CNN2    | 16.20 | 15.60 | 16.45 | 16.91 | 16.04 |
| P09543 | CNP     | 16.13 | 16.53 | 18.60 | 15.67 | 15.66 |
| Q9BT09 | CNPY3   | 15.72 | 16.03 | 16.93 | 16.47 | 16.39 |
| Q99715 | COL12A1 | 16.12 | 15.97 | 16.70 | 16.18 | 15.35 |



|        |          |       |       |       |       |       |
|--------|----------|-------|-------|-------|-------|-------|
| Q05707 | COL14A1  | 18.91 | 17.25 | 18.30 | 17.93 | 19.22 |
| P02452 | COL1A1   | 16.74 | 16.79 | 17.00 | 15.71 | 18.81 |
| P08123 | COL1A2   | 15.73 | 15.29 | 17.08 | 16.37 | 16.60 |
| P02461 | COL3A1   | 16.21 | 15.60 | 15.85 | 16.72 | 16.02 |
| P12109 | COL6A1   | 17.40 | 18.52 | 20.14 | 19.28 | 20.15 |
| P12110 | COL6A2   | 17.55 | 17.89 | 19.06 | 18.87 | 18.59 |
| P12111 | COL6A3   | 20.53 | 20.55 | 22.15 | 21.29 | 21.43 |
| Q9BWP8 | COLEC11  | 15.71 | 16.03 | 17.48 | 15.04 | 16.78 |
| Q8NBJ5 | COLGALT1 | 15.76 | 16.61 | 16.50 | 16.15 | 15.65 |
| P49747 | COMP     | 20.61 | 20.99 | 19.48 | 18.72 | 20.37 |
| P21964 | COMT     | 17.94 | 17.35 | 18.33 | 17.14 | 18.54 |
| P53621 | COPA     | 17.22 | 16.25 | 18.12 | 17.62 | 17.18 |
| P53618 | COPB1    | 16.32 | 15.91 | 16.61 | 15.93 | 15.67 |
| P35606 | COPB2    | 15.70 | 16.01 | 16.19 | 16.87 | 15.42 |
| O14579 | COPE     | 16.95 | 16.58 | 17.35 | 16.05 | 16.61 |
| P31146 | CORO1A   | 20.76 | 19.04 | 20.86 | 20.70 | 19.03 |
| P57737 | CORO7    | 16.13 | 16.66 | 15.82 | 15.29 | 16.06 |
| Q14019 | COTL1    | 16.02 | 15.53 | 16.79 | 16.16 | 15.76 |
| P00450 | CP       | 27.96 | 28.11 | 27.78 | 28.15 | 27.87 |
| Q96IY4 | CPB2     | 19.70 | 20.34 | 18.96 | 19.07 | 18.95 |
| P15169 | CPN1     | 16.49 | 15.58 | 16.31 | 16.33 | 16.58 |
| P22792 | CPN2     | 18.50 | 15.91 | 18.46 | 17.35 | 19.22 |
| Q99829 | CPNE1    | 20.38 | 18.04 | 20.49 | 19.04 | 18.99 |
| Q96FN4 | CPNE2    | 16.79 | 16.26 | 17.78 | 16.42 | 16.20 |
| O75131 | CPNE3    | 21.66 | 21.28 | 20.96 | 21.39 | 20.79 |
| P17927 | CR1      | 19.68 | 20.26 | 21.80 | 20.22 | 19.86 |
| P54108 | CRISP3   | 16.20 | 15.93 | 17.04 | 17.96 | 16.10 |
| P02741 | CRP      | 19.41 | 17.24 | 18.50 | 20.46 | 20.58 |
| Q9NQ79 | CRTAC1   | 16.82 | 17.43 | 19.29 | 17.37 | 19.54 |
| P02511 | CRYAB    | 20.20 | 21.23 | 20.57 | 21.92 | 21.20 |

|        |         |       |       |       |       |       |
|--------|---------|-------|-------|-------|-------|-------|
| P41240 | CSK     | 15.99 | 15.56 | 16.57 | 16.32 | 16.16 |
| P50461 | CSRP3   | 17.49 | 16.26 | 15.75 | 17.22 | 16.34 |
| P01040 | CSTA    | 15.83 | 16.10 | 17.12 | 16.71 | 16.15 |
| P07339 | CTSD    | 16.66 | 16.64 | 16.67 | 17.56 | 17.43 |
| P08311 | CTSG    | 23.83 | 23.95 | 23.34 | 23.92 | 24.04 |
| P25774 | CTSS    | 15.99 | 15.64 | 16.46 | 16.29 | 16.34 |
| P25025 | CXCR2   | 17.43 | 17.33 | 15.48 | 15.61 | 16.00 |
| P00167 | CYB5A   | 16.20 | 16.59 | 16.57 | 17.07 | 15.32 |
| O43169 | CYB5B   | 15.70 | 16.14 | 17.66 | 16.70 | 15.99 |
| P00387 | CYB5R3  | 20.06 | 19.93 | 20.51 | 19.59 | 19.79 |
| P13498 | CYBA    | 21.21 | 21.81 | 21.74 | 21.25 | 21.82 |
| P04839 | CYBB    | 22.69 | 23.01 | 23.44 | 22.96 | 22.64 |
| Q7L576 | CYFIP1  | 15.82 | 15.95 | 16.14 | 16.03 | 15.83 |
| Q96F07 | CYFIP2  | 18.56 | 18.59 | 18.88 | 17.75 | 17.82 |
| Q08477 | CYP4F3  | 20.75 | 20.95 | 21.20 | 20.39 | 20.78 |
| Q9H1C7 | CYSTM1  | 17.49 | 17.93 | 15.82 | 16.51 | 15.90 |
| Q8NCG7 | DAGLB   | 15.66 | 16.62 | 16.11 | 15.50 | 16.10 |
| P07585 | DCN     | 20.70 | 21.52 | 20.88 | 20.60 | 20.87 |
| P39656 | DDOST   | 20.68 | 20.06 | 20.54 | 20.36 | 19.95 |
| P59666 | DEFA3   | 21.60 | 22.58 | 18.93 | 21.24 | 20.98 |
| Q9Y315 | DERA    | 16.38 | 16.40 | 15.48 | 16.00 | 15.40 |
| P17661 | DES     | 17.34 | 15.98 | 15.76 | 15.06 | 15.61 |
| Q9UBM7 | DHCR7   | 15.84 | 15.43 | 16.51 | 16.26 | 15.85 |
| Q9Y394 | DHRS7   | 19.55 | 20.24 | 20.46 | 19.71 | 19.41 |
| Q08211 | DHX9    | 15.48 | 15.45 | 17.02 | 16.13 | 16.03 |
| O60610 | DIAPH1  | 16.57 | 15.53 | 17.38 | 16.79 | 16.15 |
| P36957 | DLST    | 16.24 | 15.78 | 18.30 | 17.05 | 15.85 |
| Q9UBS4 | DNAJB11 | 16.44 | 15.48 | 17.17 | 15.62 | 15.70 |
| O75165 | DNAJC13 | 16.90 | 16.23 | 18.08 | 17.03 | 17.19 |
| P50570 | DNM2    | 15.05 | 16.16 | 17.10 | 16.85 | 16.70 |

|        |         |       |       |       |       |       |
|--------|---------|-------|-------|-------|-------|-------|
| Q92608 | DOCK2   | 16.19 | 15.66 | 18.63 | 17.58 | 17.71 |
| Q8NF50 | DOCK8   | 15.61 | 16.01 | 16.62 | 15.50 | 15.39 |
| Q16555 | DPYSL2  | 16.76 | 16.64 | 18.06 | 17.24 | 16.39 |
| Q08554 | DSC1    | 16.27 | 16.45 | 16.93 | 16.24 | 15.35 |
| P15924 | DSP     | 15.52 | 16.31 | 16.74 | 17.00 | 17.83 |
| P60981 | DSTN    | 16.30 | 15.84 | 16.21 | 17.10 | 16.11 |
| Q14204 | DYNC1H1 | 16.29 | 16.76 | 16.52 | 17.40 | 16.15 |
| O75923 | DYSF    | 20.43 | 19.44 | 22.33 | 20.57 | 20.40 |
| Q16610 | ECM1    | 20.62 | 21.13 | 20.31 | 20.68 | 19.78 |
| P68104 | EEF1A1  | 21.66 | 21.80 | 22.16 | 22.10 | 22.12 |
| Q05639 | EEF1A2  | 18.04 | 16.53 | 17.53 | 17.90 | 16.17 |
| P26641 | EEF1G   | 16.51 | 16.49 | 16.33 | 16.27 | 17.67 |
| P13639 | EEF2    | 16.75 | 16.35 | 18.65 | 17.01 | 17.36 |
| Q12805 | EFEMP1  | 16.41 | 16.66 | 17.97 | 16.61 | 15.27 |
| Q96C19 | EFHD2   | 15.98 | 15.62 | 15.92 | 15.28 | 16.36 |
| Q9H4M9 | EHD1    | 20.47 | 20.89 | 21.10 | 21.06 | 20.92 |
| Q9NZN4 | EHD2    | 18.52 | 19.78 | 20.54 | 21.82 | 20.26 |
| Q9H223 | EHD4    | 16.00 | 16.22 | 16.03 | 15.82 | 15.84 |
| Q99613 | EIF3C   | 16.31 | 15.55 | 15.62 | 16.38 | 16.66 |
| P60842 | EIF4A1  | 16.67 | 16.23 | 17.27 | 16.82 | 16.83 |
| P08246 | ELANE   | 18.72 | 19.75 | 20.36 | 19.58 | 19.20 |
| Q92556 | ELMO1   | 16.07 | 16.22 | 17.09 | 15.81 | 15.66 |
| Q6PCB8 | EMB     | 16.83 | 16.13 | 16.84 | 16.25 | 16.22 |
| Q9UHX3 | EMR2    | 15.94 | 15.85 | 16.21 | 15.93 | 15.18 |
| Q9BY15 | EMR3    | 15.86 | 15.67 | 18.33 | 17.64 | 15.42 |
| P06733 | ENO1    | 22.32 | 22.52 | 23.11 | 22.68 | 23.23 |
| P13929 | ENO3    | 17.38 | 16.93 | 17.70 | 17.45 | 16.26 |
| Q9Y6X5 | ENPP4   | 16.17 | 16.07 | 15.86 | 16.65 | 16.01 |
| P11171 | EPB41   | 19.28 | 19.43 | 19.40 | 18.48 | 17.31 |
| P16452 | EPB42   | 20.75 | 20.77 | 20.29 | 20.24 | 19.18 |

|        |         |       |       |       |       |       |
|--------|---------|-------|-------|-------|-------|-------|
| P07099 | EPHX1   | 21.13 | 21.50 | 21.68 | 22.47 | 20.76 |
| P11678 | EPX     | 16.82 | 18.20 | 19.20 | 16.27 | 18.34 |
| Q9NZ08 | ERAP1   | 16.63 | 16.36 | 18.27 | 17.22 | 15.26 |
| Q96RT1 | ERBB2IP | 16.23 | 16.72 | 17.43 | 16.95 | 16.51 |
| Q969X5 | ERGIC1  | 15.90 | 15.40 | 16.09 | 15.97 | 15.72 |
| O75477 | ERLIN1  | 17.79 | 17.47 | 19.11 | 18.38 | 16.26 |
| O94905 | ERLIN2  | 17.23 | 15.66 | 18.14 | 17.46 | 16.50 |
| Q96HE7 | ERO1L   | 16.52 | 15.10 | 18.78 | 17.16 | 17.43 |
| P30040 | ERP29   | 20.74 | 20.22 | 21.71 | 20.60 | 20.81 |
| Q9BS26 | ERP44   | 20.04 | 19.73 | 20.83 | 19.86 | 19.63 |
| P10768 | ESD     | 18.00 | 17.16 | 17.11 | 17.08 | 18.15 |
| Q9BSJ8 | ESYT1   | 16.85 | 16.78 | 19.29 | 18.08 | 16.99 |
| A0FGR8 | ESYT2   | 15.65 | 16.40 | 16.68 | 16.11 | 15.91 |
| P34910 | EVI2B   | 18.31 | 17.82 | 20.23 | 19.10 | 18.18 |
| P15311 | EZR     | 15.97 | 16.77 | 17.76 | 16.05 | 16.89 |
| P00742 | F10     | 22.08 | 20.09 | 19.20 | 22.25 | 22.53 |
| P03951 | F11     | 16.63 | 16.28 | 16.48 | 15.63 | 15.26 |
| Q9Y624 | F11R    | 16.69 | 16.22 | 18.74 | 15.80 | 17.38 |
| P00748 | F12     | 16.97 | 16.93 | 18.62 | 19.12 | 18.40 |
| P00488 | F13A1   | 20.28 | 19.82 | 20.30 | 20.32 | 20.43 |
| P05160 | F13B    | 17.11 | 16.00 | 17.79 | 17.42 | 16.07 |
| P00734 | F2      | 26.49 | 25.97 | 24.81 | 26.05 | 26.59 |
| P12259 | F5      | 18.05 | 17.47 | 20.25 | 17.96 | 19.50 |
| P00740 | F9      | 21.10 | 20.81 | 20.12 | 21.32 | 21.63 |
| P15090 | FABP4   | 20.61 | 21.87 | 21.58 | 22.39 | 21.85 |
| Q9NUU6 | FAM105A | 16.12 | 15.59 | 17.67 | 16.22 | 15.19 |
| Q9BRX8 | FAM213A | 16.54 | 17.78 | 18.48 | 18.11 | 17.00 |
| Q9NUQ9 | FAM49B  | 17.21 | 16.89 | 18.86 | 18.02 | 15.79 |
| P49327 | FASN    | 18.63 | 17.39 | 19.32 | 21.54 | 16.60 |
| P23142 | FBLN1   | 21.16 | 20.44 | 21.91 | 21.07 | 20.66 |

|        |        |       |       |       |       |       |
|--------|--------|-------|-------|-------|-------|-------|
| P35555 | FBN1   | 16.64 | 16.52 | 18.47 | 16.91 | 17.27 |
| P24071 | FCAR   | 18.12 | 18.50 | 18.50 | 19.70 | 16.89 |
| P30273 | FCER1G | 16.49 | 16.58 | 19.31 | 15.72 | 16.06 |
| Q9Y6R7 | FCGBP  | 21.30 | 20.91 | 22.01 | 20.91 | 21.14 |
| P12318 | FCGR2A | 17.62 | 18.17 | 19.05 | 18.03 | 16.76 |
| O75015 | FCGR3B | 21.64 | 22.19 | 23.01 | 22.07 | 21.04 |
| P55899 | FCGRT  | 17.31 | 16.37 | 17.58 | 16.99 | 15.89 |
| O00602 | FCN1   | 20.15 | 21.30 | 20.03 | 18.82 | 16.46 |
| Q15485 | FCN2   | 18.59 | 17.03 | 21.96 | 19.50 | 18.55 |
| O75636 | FCN3   | 23.33 | 24.28 | 23.08 | 23.48 | 23.67 |
| Q96AC1 | FERMT2 | 16.52 | 16.81 | 16.27 | 16.59 | 15.64 |
| Q86UX7 | FERMT3 | 20.64 | 20.92 | 20.92 | 20.59 | 20.67 |
| Q9UGM5 | FETUB  | 16.45 | 15.85 | 18.45 | 17.81 | 17.11 |
| P02671 | FGA    | 27.77 | 28.37 | 27.54 | 28.74 | 27.82 |
| P02675 | FGB    | 29.07 | 29.51 | 28.71 | 29.44 | 28.67 |
| P02679 | FGG    | 28.85 | 29.18 | 29.05 | 29.45 | 28.83 |
| P09769 | FGR    | 19.41 | 19.94 | 19.98 | 19.85 | 19.82 |
| Q13642 | FHL1   | 20.19 | 19.93 | 19.78 | 19.70 | 20.03 |
| P26885 | FKBP2  | 15.67 | 15.80 | 17.26 | 16.79 | 15.77 |
| Q5D862 | FLG2   | 16.74 | 15.51 | 16.50 | 18.07 | 16.44 |
| P21333 | FLNA   | 21.62 | 20.52 | 22.94 | 21.88 | 21.12 |
| Q14315 | FLNC   | 16.92 | 16.28 | 16.00 | 15.34 | 15.42 |
| O75955 | FLOT1  | 20.20 | 19.92 | 21.43 | 20.39 | 19.86 |
| Q14254 | FLOT2  | 20.78 | 20.63 | 21.59 | 21.06 | 20.04 |
| O95466 | FMNL1  | 17.43 | 16.67 | 19.41 | 18.76 | 17.61 |
| P02751 | FN1    | 27.77 | 28.31 | 27.85 | 26.59 | 27.57 |
| P02794 | FTH1   | 20.05 | 19.41 | 18.11 | 19.56 | 20.70 |
| P02792 | FTL    | 20.78 | 19.12 | 19.19 | 20.52 | 20.32 |
| P11413 | G6PD   | 18.95 | 17.01 | 18.90 | 19.20 | 17.87 |
| Q14697 | GANAB  | 20.16 | 19.90 | 21.26 | 20.10 | 19.82 |

|        |        |       |       |       |       |       |
|--------|--------|-------|-------|-------|-------|-------|
| P04406 | GAPDH  | 25.43 | 25.41 | 25.06 | 25.62 | 25.79 |
| P02774 | GC     | 23.56 | 23.31 | 23.14 | 23.68 | 24.01 |
| P28676 | GCA    | 23.77 | 23.64 | 22.91 | 23.08 | 23.07 |
| P50395 | GDI2   | 17.33 | 16.76 | 20.53 | 19.24 | 18.09 |
| P36269 | GGT5   | 16.92 | 15.94 | 16.81 | 15.97 | 15.80 |
| Q92896 | GLG1   | 15.75 | 16.05 | 16.22 | 15.85 | 15.55 |
| Q9H4G4 | GLIPR2 | 20.84 | 21.02 | 21.53 | 21.18 | 20.59 |
| P35754 | GLRX   | 15.79 | 16.65 | 15.97 | 16.70 | 15.97 |
| O60234 | GMFG   | 16.09 | 16.74 | 15.65 | 15.52 | 16.08 |
| Q14344 | GNA13  | 17.12 | 17.45 | 18.55 | 16.93 | 16.81 |
| P04899 | GNAI2  | 23.95 | 24.31 | 24.10 | 23.86 | 23.79 |
| P08754 | GNAI3  | 17.12 | 17.04 | 19.28 | 17.34 | 18.56 |
| P50148 | GNAQ   | 16.59 | 16.22 | 18.03 | 17.43 | 16.79 |
| P63092 | GNAS   | 17.54 | 16.79 | 19.03 | 18.90 | 17.08 |
| P62873 | GNB1   | 20.63 | 21.12 | 20.97 | 21.05 | 19.58 |
| P62879 | GNB2   | 22.97 | 23.04 | 22.91 | 22.91 | 22.57 |
| P63244 | GNB2L1 | 16.16 | 15.66 | 16.21 | 16.81 | 17.31 |
| Q9HAV0 | GNB4   | 16.32 | 16.41 | 18.02 | 17.41 | 15.97 |
| P63218 | GNG5   | 15.65 | 15.67 | 18.12 | 15.49 | 16.45 |
| P13224 | GP1BB  | 16.92 | 16.27 | 16.96 | 15.87 | 16.04 |
| P21695 | GPD1   | 16.77 | 19.09 | 19.48 | 21.05 | 19.03 |
| P06744 | GPI    | 19.25 | 19.31 | 20.11 | 19.89 | 18.93 |
| P80108 | GPLD1  | 16.40 | 15.61 | 15.95 | 15.73 | 18.43 |
| Q86Y34 | GPR97  | 16.69 | 17.10 | 18.95 | 17.67 | 17.23 |
| Q9Y4H4 | GPSM3  | 15.72 | 16.45 | 16.31 | 16.57 | 15.86 |
| P07203 | GPX1   | 17.04 | 17.18 | 17.47 | 17.91 | 16.83 |
| P22352 | GPX3   | 16.38 | 17.04 | 15.40 | 16.05 | 15.21 |
| P62993 | GRB2   | 16.23 | 16.97 | 17.63 | 16.69 | 15.61 |
| P43250 | GRK6   | 16.19 | 16.80 | 17.25 | 16.24 | 17.17 |
| P06396 | GSN    | 24.74 | 24.51 | 25.26 | 24.56 | 24.73 |

|        |           |       |       |       |       |       |
|--------|-----------|-------|-------|-------|-------|-------|
| Q9Y2Q3 | GSTK1     | 15.35 | 16.76 | 15.56 | 16.96 | 16.13 |
| P28161 | GSTM2     | 15.40 | 15.44 | 15.87 | 16.99 | 15.20 |
| P09211 | GSTP1     | 19.16 | 19.07 | 20.85 | 20.12 | 20.79 |
| P08236 | GUSB      | 16.10 | 15.96 | 15.98 | 16.30 | 15.17 |
| P46976 | GYG1      | 17.08 | 15.47 | 16.33 | 15.94 | 17.18 |
| P02724 | GYPA      | 16.06 | 17.58 | 15.33 | 17.35 | 16.49 |
| P13807 | GYS1      | 19.00 | 17.39 | 17.01 | 17.66 | 18.36 |
| Q71UI9 | H2AFV     | 18.70 | 19.84 | 17.30 | 18.13 | 18.80 |
| O75367 | H2AFY     | 19.85 | 20.66 | 19.18 | 20.02 | 20.33 |
| O95479 | H6PD      | 16.02 | 16.34 | 16.57 | 17.29 | 16.58 |
| Q14520 | HABP2     | 25.24 | 25.65 | 24.47 | 24.95 | 25.44 |
| Q16836 | HADH      | 15.90 | 16.66 | 16.29 | 17.08 | 16.08 |
| P40939 | HADHA     | 16.36 | 15.71 | 17.17 | 17.47 | 15.90 |
| P69905 | HBA1      | 27.78 | 28.30 | 27.41 | 27.88 | 28.63 |
| P68871 | HBB       | 28.47 | 28.77 | 28.01 | 28.45 | 28.91 |
| P02042 | HBD       | 22.00 | 22.85 | 20.89 | 21.96 | 23.03 |
| P69892 | HBG2      | 17.36 | 15.53 | 16.68 | 18.05 | 17.75 |
| P08631 | HCK       | 18.58 | 18.87 | 20.29 | 19.23 | 18.29 |
| Q99878 | HIST1H2AJ | 25.53 | 25.39 | 25.63 | 25.47 | 26.17 |
| Q99879 | HIST1H2BM | 25.28 | 25.73 | 25.23 | 25.45 | 26.05 |
| P62805 | HIST1H4A  | 27.61 | 27.93 | 27.68 | 27.85 | 28.04 |
| Q71DI3 | HIST2H3A  | 25.67 | 25.27 | 26.33 | 25.60 | 25.90 |
| P52790 | HK3       | 15.91 | 15.72 | 16.32 | 15.93 | 16.74 |
| P01892 | HLA-A     | 20.31 | 21.08 | 20.59 | 21.59 | 20.16 |
| P04439 | HLA-A     | 15.35 | 15.68 | 17.50 | 15.00 | 16.15 |
| P05534 | HLA-A     | 15.90 | 15.90 | 17.64 | 15.93 | 16.34 |
| P18463 | HLA-B     | 19.73 | 20.77 | 22.25 | 21.38 | 21.14 |
| P30508 | HLA-C     | 17.05 | 16.19 | 18.35 | 17.79 | 19.23 |
| P01903 | HLA-DRA   | 16.55 | 18.01 | 19.50 | 18.15 | 18.61 |
| Q5Y7A7 | HLA-DRB1  | 15.76 | 16.55 | 18.26 | 17.81 | 16.74 |

|        |          |       |       |       |       |       |
|--------|----------|-------|-------|-------|-------|-------|
| P79483 | HLA-DRB3 | 16.27 | 15.88 | 16.34 | 15.01 | 15.74 |
| Q8TCT9 | HM13     | 15.75 | 15.93 | 16.83 | 15.60 | 15.61 |
| P09429 | HMGB1    | 18.45 | 17.98 | 16.99 | 19.35 | 16.85 |
| P26583 | HMGB2    | 20.22 | 19.15 | 15.85 | 19.29 | 19.35 |
| Q92619 | HMHA1    | 15.95 | 15.61 | 15.97 | 15.67 | 15.25 |
| P07910 | HNRNPC   | 18.67 | 18.05 | 17.25 | 19.39 | 17.65 |
| Q14103 | HNRNPD   | 17.51 | 17.00 | 19.43 | 17.91 | 16.95 |
| P31943 | HNRNPH1  | 15.35 | 15.54 | 16.22 | 16.99 | 15.74 |
| P61978 | HNRNPK   | 15.98 | 15.97 | 18.17 | 17.66 | 17.86 |
| Q00839 | HNRNPU   | 17.38 | 18.11 | 17.00 | 17.59 | 17.34 |
| P00738 | HP       | 27.24 | 28.30 | 25.94 | 27.44 | 27.92 |
| P00739 | HPR      | 24.00 | 23.03 | 22.28 | 22.09 | 22.99 |
| P02790 | HPX      | 24.17 | 24.34 | 24.52 | 24.91 | 24.92 |
| P04196 | HRG      | 23.26 | 22.65 | 22.98 | 22.86 | 23.04 |
| Q8NBQ5 | HSD17B11 | 18.74 | 18.79 | 19.11 | 17.84 | 17.84 |
| Q53GQ0 | HSD17B12 | 16.63 | 16.70 | 19.16 | 17.90 | 17.84 |
| P51659 | HSD17B4  | 16.33 | 16.07 | 18.30 | 17.62 | 16.28 |
| P07900 | HSP90AA1 | 20.86 | 19.31 | 19.44 | 21.48 | 20.97 |
| P08238 | HSP90AB1 | 18.36 | 15.93 | 19.10 | 19.01 | 17.97 |
| P14625 | HSP90B1  | 22.09 | 21.67 | 23.15 | 22.24 | 22.04 |
| P08107 | HSPA1A   | 21.25 | 20.85 | 21.56 | 21.23 | 21.53 |
| P11021 | HSPA5    | 22.43 | 22.12 | 23.67 | 22.47 | 22.48 |
| P11142 | HSPA8    | 21.76 | 21.26 | 22.21 | 21.65 | 21.63 |
| P04792 | HSPB1    | 18.78 | 18.97 | 18.39 | 18.80 | 18.82 |
| O14558 | HSPB6    | 17.29 | 16.04 | 16.39 | 18.98 | 15.35 |
| P10809 | HSPD1    | 16.06 | 16.27 | 17.44 | 17.94 | 16.04 |
| P98160 | HSPG2    | 16.75 | 16.30 | 18.56 | 17.98 | 16.13 |
| Q92743 | HTRA1    | 15.76 | 15.94 | 16.59 | 15.07 | 15.28 |
| Q96D96 | HVCN1    | 15.53 | 16.63 | 17.44 | 16.00 | 15.03 |
| Q9Y4L1 | HYOU1    | 16.16 | 15.96 | 16.98 | 15.57 | 15.45 |



|        |          |       |       |       |       |       |
|--------|----------|-------|-------|-------|-------|-------|
| P05362 | ICAM1    | 16.21 | 15.52 | 15.98 | 15.58 | 15.45 |
| P32942 | ICAM3    | 21.34 | 21.41 | 22.17 | 21.55 | 21.00 |
| O75874 | IDH1     | 16.76 | 15.62 | 17.84 | 17.60 | 16.31 |
| P48735 | IDH2     | 16.07 | 16.60 | 17.57 | 17.49 | 16.98 |
| Q01628 | IFITM3   | 15.42 | 16.68 | 16.10 | 16.22 | 15.77 |
| P11717 | IGF2R    | 17.97 | 18.07 | 18.78 | 18.92 | 16.40 |
| P35858 | IGFALS   | 17.23 | 16.00 | 17.22 | 16.96 | 18.40 |
| P01876 | IGHA1    | 27.34 | 27.38 | 26.61 | 27.01 | 27.34 |
| P01877 | IGHA2    | 21.54 | 21.57 | 20.91 | 20.31 | 21.28 |
| P01880 | IGHD     | 17.17 | 18.38 | 17.33 | 15.12 | 18.05 |
| P01857 | IGHG1    | 29.04 | 29.27 | 28.76 | 29.08 | 28.96 |
| P01859 | IGHG2    | 27.69 | 27.75 | 27.50 | 27.43 | 27.91 |
| P01860 | IGHG3    | 26.19 | 25.79 | 24.77 | 25.94 | 25.29 |
| P01861 | IGHG4    | 23.15 | 24.99 | 23.40 | 25.07 | 24.08 |
| P01871 | IGHM     | 29.43 | 29.05 | 29.03 | 28.85 | 29.17 |
| P01764 | IGHV3-23 | 25.30 | 25.20 | 24.64 | 23.87 | 24.46 |
| P01591 | IGJ      | 25.72 | 24.99 | 24.81 | 24.33 | 25.14 |
| P01834 | IGKC     | 27.89 | 27.95 | 27.77 | 27.91 | 27.98 |
| P01602 | IGKV1-5  | 15.35 | 15.16 | 19.56 | 15.92 | 15.50 |
| P0CG05 | IGLC2    | 27.41 | 27.74 | 26.95 | 27.18 | 27.21 |
| B9A064 | IGLL5    | 24.71 | 23.72 | 23.78 | 24.10 | 21.46 |
| Q13418 | ILK      | 16.97 | 16.86 | 17.82 | 18.27 | 17.42 |
| P46940 | IQGAP1   | 17.19 | 15.76 | 19.78 | 18.03 | 17.86 |
| P08514 | ITGA2B   | 21.61 | 20.79 | 20.79 | 20.72 | 20.85 |
| P08648 | ITGA5    | 16.07 | 15.49 | 17.36 | 16.00 | 15.92 |
| P23229 | ITGA6    | 17.54 | 16.39 | 16.08 | 16.28 | 15.43 |
| P20701 | ITGAL    | 17.76 | 18.61 | 19.72 | 16.83 | 15.92 |
| P11215 | ITGAM    | 24.65 | 24.87 | 25.33 | 24.67 | 24.82 |
| P20702 | ITGAX    | 17.61 | 17.99 | 19.70 | 17.59 | 16.65 |
| P05556 | ITGB1    | 17.89 | 16.37 | 18.98 | 17.94 | 17.74 |

|        |        |       |       |       |       |       |
|--------|--------|-------|-------|-------|-------|-------|
| P05107 | ITGB2  | 24.65 | 25.10 | 24.91 | 24.62 | 24.59 |
| P05106 | ITGB3  | 21.54 | 21.04 | 20.30 | 20.35 | 20.14 |
| P19827 | ITIH1  | 25.17 | 24.87 | 24.74 | 24.88 | 25.76 |
| P19823 | ITIH2  | 25.69 | 25.48 | 25.66 | 25.67 | 26.66 |
| Q06033 | ITIH3  | 21.17 | 21.15 | 21.39 | 21.91 | 21.62 |
| Q14624 | ITIH4  | 23.69 | 23.70 | 23.19 | 23.75 | 23.55 |
| Q14571 | ITPR2  | 16.20 | 15.95 | 15.88 | 16.03 | 15.24 |
| Q8IWB1 | ITPRIP | 15.59 | 16.07 | 16.31 | 15.60 | 15.92 |
| P14923 | JUP    | 16.16 | 16.22 | 16.90 | 18.11 | 17.07 |
| Q13303 | KCNAB2 | 17.73 | 16.39 | 17.39 | 17.41 | 17.34 |
| Q96CX2 | KCTD12 | 15.75 | 14.77 | 16.40 | 16.12 | 15.77 |
| P03952 | KLKB1  | 19.62 | 19.21 | 19.95 | 19.54 | 19.63 |
| P01042 | KNG1   | 21.81 | 21.41 | 22.91 | 21.90 | 22.40 |
| Q14974 | KPNB1  | 16.93 | 15.62 | 17.35 | 17.73 | 16.39 |
| P01116 | KRAS   | 15.50 | 17.15 | 16.95 | 17.32 | 16.01 |
| P04264 | KRT1   | 26.53 | 26.37 | 26.76 | 26.14 | 25.82 |
| P13645 | KRT10  | 25.65 | 25.66 | 25.50 | 24.87 | 24.09 |
| P13646 | KRT13  | 15.20 | 15.44 | 17.11 | 16.70 | 15.37 |
| P02533 | KRT14  | 20.42 | 18.68 | 22.01 | 20.06 | 19.20 |
| P08779 | KRT16  | 18.12 | 16.17 | 17.42 | 18.21 | 18.00 |
| P35908 | KRT2   | 25.09 | 24.58 | 24.85 | 23.63 | 22.70 |
| P19013 | KRT4   | 16.22 | 15.90 | 17.05 | 16.55 | 15.55 |
| P13647 | KRT5   | 19.21 | 18.80 | 21.11 | 19.09 | 18.17 |
| P02538 | KRT6A  | 20.37 | 17.89 | 21.24 | 20.10 | 18.88 |
| Q7Z794 | KRT77  | 17.01 | 16.63 | 15.75 | 16.31 | 15.70 |
| P35527 | KRT9   | 24.85 | 23.74 | 25.49 | 24.71 | 23.94 |
| Q16363 | LAMA4  | 16.61 | 15.72 | 15.74 | 16.80 | 15.74 |
| P11047 | LAMC1  | 15.81 | 16.05 | 16.39 | 16.39 | 15.86 |
| P11279 | LAMP1  | 20.35 | 20.47 | 20.29 | 20.52 | 19.62 |
| P13473 | LAMP2  | 19.99 | 20.27 | 19.24 | 19.76 | 17.24 |

|        |          |       |       |       |       |       |
|--------|----------|-------|-------|-------|-------|-------|
| Q9UHA4 | LAMTOR3  | 16.57 | 16.21 | 18.03 | 16.76 | 15.86 |
| P18428 | LBP      | 20.44 | 21.01 | 22.79 | 21.41 | 20.92 |
| Q14739 | LBR      | 19.69 | 19.08 | 19.59 | 18.85 | 18.41 |
| P80188 | LCN2     | 22.73 | 22.92 | 23.00 | 22.90 | 22.31 |
| P13796 | LCP1     | 19.68 | 19.71 | 21.66 | 20.72 | 19.73 |
| P00338 | LDHA     | 19.78 | 20.16 | 20.55 | 19.77 | 19.80 |
| P07195 | LDHB     | 18.44 | 16.40 | 18.24 | 17.79 | 17.52 |
| P09382 | LGALS1   | 20.76 | 21.04 | 20.84 | 21.71 | 20.81 |
| P17931 | LGALS3   | 16.72 | 16.76 | 17.78 | 17.35 | 16.39 |
| Q08380 | LGALS3BP | 24.20 | 24.46 | 23.63 | 23.71 | 24.45 |
| Q6PI73 | LILRA6   | 15.45 | 16.10 | 18.04 | 16.57 | 17.02 |
| Q8N423 | LILRB2   | 16.22 | 17.07 | 19.15 | 17.74 | 17.08 |
| O75022 | LILRB3   | 15.89 | 15.57 | 17.12 | 16.88 | 15.81 |
| Q05469 | LIPE     | 16.42 | 17.32 | 18.27 | 18.09 | 15.86 |
| P49257 | LMAN1    | 18.13 | 18.31 | 18.53 | 18.12 | 17.53 |
| Q12907 | LMAN2    | 19.68 | 20.05 | 19.34 | 19.18 | 19.55 |
| P02545 | LMNA     | 15.92 | 16.02 | 16.59 | 16.83 | 15.03 |
| Q9C0E8 | LNP      | 15.41 | 16.46 | 17.48 | 17.43 | 15.76 |
| Q9UIQ6 | LNPEP    | 15.42 | 16.04 | 17.26 | 17.27 | 15.31 |
| P08519 | LPA      | 17.44 | 16.63 | 15.42 | 21.53 | 18.80 |
| Q7L5N7 | LPCAT2   | 18.76 | 18.99 | 19.49 | 18.67 | 18.23 |
| Q92604 | LPGAT1   | 16.55 | 16.62 | 18.53 | 17.34 | 16.32 |
| P02750 | LRG1     | 17.38 | 15.73 | 19.01 | 18.68 | 18.15 |
| Q07954 | LRP1     | 18.65 | 18.51 | 19.18 | 19.64 | 17.33 |
| Q8N386 | LRRC25   | 16.49 | 16.91 | 17.93 | 17.69 | 16.47 |
| P33241 | LSP1     | 15.79 | 15.12 | 16.40 | 16.51 | 15.76 |
| P09960 | LTA4H    | 17.34 | 17.63 | 18.05 | 18.29 | 17.39 |
| Q15722 | LTB4R    | 16.17 | 17.79 | 17.17 | 16.15 | 15.74 |
| P02788 | LTF      | 28.31 | 28.79 | 27.90 | 28.33 | 28.11 |
| P51884 | LUM      | 22.31 | 22.59 | 22.39 | 22.12 | 22.08 |

|        |         |       |       |       |       |       |
|--------|---------|-------|-------|-------|-------|-------|
| O60449 | LY75    | 15.48 | 16.23 | 16.18 | 16.11 | 15.84 |
| P07948 | LYN     | 19.08 | 19.41 | 20.87 | 19.67 | 18.94 |
| P61626 | LYZ     | 22.79 | 23.48 | 23.13 | 22.68 | 23.80 |
| P20645 | M6PR    | 15.42 | 16.38 | 16.31 | 15.92 | 15.40 |
| P33908 | MAN1A1  | 15.45 | 15.74 | 15.57 | 16.60 | 16.51 |
| P21397 | MAOA    | 16.18 | 15.86 | 17.18 | 17.61 | 15.29 |
| P28482 | MAPK1   | 15.96 | 15.60 | 15.13 | 16.10 | 16.54 |
| Q16539 | MAPK14  | 15.44 | 16.14 | 15.92 | 15.32 | 16.04 |
| P29966 | MARCKS  | 18.54 | 19.33 | 21.03 | 19.89 | 20.87 |
| P48740 | MASP1   | 21.05 | 21.08 | 17.78 | 20.31 | 18.42 |
| O00187 | MASP2   | 16.10 | 18.27 | 15.93 | 16.64 | 19.05 |
| P11226 | MBL2    | 18.28 | 18.20 | 17.02 | 16.27 | 15.59 |
| Q6ZWT7 | MBOAT2  | 16.05 | 16.72 | 16.56 | 15.87 | 15.62 |
| Q96N66 | MBOAT7  | 17.09 | 17.37 | 18.70 | 16.49 | 16.44 |
| P43121 | MCAM    | 16.79 | 16.25 | 18.14 | 17.44 | 15.12 |
| Q8IX19 | MCEMP1  | 16.27 | 16.91 | 18.62 | 18.03 | 17.27 |
| Q8NI22 | MCFD2   | 17.23 | 16.50 | 17.78 | 16.46 | 16.47 |
| P40925 | MDH1    | 15.73 | 17.11 | 16.25 | 17.08 | 15.58 |
| P40926 | MDH2    | 16.22 | 16.15 | 15.86 | 15.62 | 16.02 |
| Q9H8H3 | METTL7A | 16.86 | 15.67 | 17.72 | 17.33 | 16.66 |
| P55083 | MFAP4   | 18.38 | 16.33 | 15.18 | 15.61 | 16.83 |
| Q08431 | MFGE8   | 15.96 | 16.68 | 16.23 | 15.59 | 15.99 |
| Q14728 | MFSD10  | 15.82 | 16.28 | 18.70 | 16.55 | 15.77 |
| O43451 | MGAM    | 19.45 | 19.18 | 21.57 | 19.94 | 19.22 |
| Q99685 | MGLL    | 16.41 | 15.52 | 16.70 | 17.81 | 15.80 |
| P10620 | MGST1   | 16.96 | 18.50 | 15.89 | 18.55 | 17.73 |
| Q14165 | MLEC    | 16.73 | 16.35 | 18.85 | 17.71 | 16.62 |
| P08473 | MME     | 18.05 | 16.34 | 19.28 | 18.21 | 16.45 |
| P08253 | MMP2    | 17.01 | 15.92 | 15.72 | 16.09 | 15.71 |
| Q9NPA2 | MMP25   | 16.98 | 15.66 | 18.82 | 17.11 | 17.29 |

|        |        |       |       |       |       |       |
|--------|--------|-------|-------|-------|-------|-------|
| P22894 | MMP8   | 18.28 | 17.92 | 20.61 | 19.24 | 19.24 |
| P14780 | MMP9   | 23.50 | 23.18 | 24.15 | 24.09 | 23.54 |
| Q13201 | MMRN1  | 17.26 | 15.65 | 18.56 | 16.00 | 16.72 |
| P41218 | MNDA   | 20.50 | 21.09 | 20.22 | 20.41 | 21.51 |
| Q13724 | MOGS   | 16.76 | 16.13 | 17.50 | 16.72 | 15.44 |
| Q8NHP6 | MOSPD2 | 16.32 | 16.00 | 17.85 | 16.37 | 15.74 |
| P05164 | MPO    | 26.85 | 27.09 | 27.61 | 27.23 | 27.60 |
| Q00013 | MPP1   | 16.48 | 16.17 | 18.69 | 16.89 | 16.73 |
| P22897 | MRC1   | 16.20 | 16.06 | 16.92 | 16.95 | 15.72 |
| P26038 | MSN    | 21.88 | 21.98 | 22.70 | 22.26 | 22.12 |
| P11586 | MTHFD1 | 15.70 | 15.41 | 17.24 | 18.17 | 17.22 |
| Q14764 | MVP    | 24.62 | 24.55 | 24.64 | 24.66 | 24.67 |
| Q96S97 | MYADM  | 17.27 | 16.63 | 16.03 | 16.24 | 15.77 |
| Q00872 | MYBPC1 | 19.22 | 19.03 | 18.86 | 18.67 | 18.35 |
| Q14324 | MYBPC2 | 16.53 | 16.66 | 16.67 | 15.19 | 16.42 |
| P12882 | MYH1   | 22.21 | 21.36 | 22.36 | 18.57 | 22.86 |
| P35749 | MYH11  | 15.53 | 15.41 | 15.63 | 16.33 | 15.92 |
| Q9UKX2 | MYH2   | 18.99 | 16.54 | 19.24 | 17.53 | 20.91 |
| Q9Y623 | MYH4   | 15.91 | 15.27 | 16.37 | 15.93 | 15.89 |
| P12883 | MYH7   | 18.75 | 17.86 | 18.63 | 18.32 | 19.74 |
| P35579 | MYH9   | 23.31 | 22.53 | 23.40 | 23.59 | 23.72 |
| P05976 | MYL1   | 20.49 | 19.07 | 20.00 | 17.92 | 20.12 |
| P19105 | MYL12A | 19.42 | 17.29 | 19.99 | 19.96 | 19.88 |
| P08590 | MYL3   | 17.63 | 16.33 | 16.41 | 17.71 | 16.27 |
| P60660 | MYL6   | 20.00 | 20.74 | 20.50 | 21.06 | 21.23 |
| Q96A32 | MYLPF  | 18.02 | 17.04 | 17.86 | 17.14 | 18.88 |
| O00159 | MYO1C  | 17.01 | 17.29 | 18.40 | 20.42 | 18.24 |
| O00160 | MYO1F  | 20.53 | 20.05 | 20.37 | 20.11 | 20.08 |
| B0I1T2 | MYO1G  | 17.96 | 18.25 | 20.10 | 19.12 | 17.42 |
| Q9NZM1 | MYOF   | 15.31 | 16.31 | 17.21 | 16.47 | 15.35 |

|        |         |       |       |       |       |       |
|--------|---------|-------|-------|-------|-------|-------|
| P54296 | MYOM2   | 16.77 | 16.03 | 16.89 | 15.92 | 15.66 |
| Q13765 | NACA    | 16.99 | 16.02 | 15.81 | 16.76 | 15.52 |
| P43490 | NAMPT   | 15.59 | 15.93 | 18.11 | 17.83 | 18.17 |
| Q99733 | NAP1L4  | 16.60 | 15.76 | 16.01 | 15.56 | 16.13 |
| P54920 | NAPA    | 16.83 | 17.45 | 17.95 | 17.09 | 16.32 |
| P14598 | NCF1    | 17.25 | 16.18 | 18.18 | 17.64 | 17.53 |
| P19878 | NCF2    | 17.64 | 17.34 | 18.12 | 17.89 | 17.88 |
| Q15080 | NCF4    | 16.90 | 16.64 | 17.71 | 17.19 | 17.34 |
| P55160 | NCKAP1L | 17.70 | 17.78 | 17.26 | 16.63 | 16.57 |
| P19338 | NCL     | 19.24 | 17.92 | 19.32 | 18.38 | 19.09 |
| P20929 | NEB     | 16.72 | 15.34 | 15.84 | 15.60 | 15.95 |
| Q92982 | NINJ1   | 16.04 | 15.89 | 16.87 | 16.10 | 15.69 |
| P22392 | NME2    | 15.96 | 16.67 | 16.21 | 15.49 | 16.27 |
| Q15155 | NOMO1   | 15.91 | 16.29 | 15.77 | 15.51 | 16.52 |
| P06748 | NPM1    | 18.15 | 16.10 | 16.63 | 17.28 | 16.63 |
| Q9Y639 | NPTN    | 15.85 | 16.47 | 17.18 | 15.56 | 15.74 |
| P01111 | NRAS    | 16.07 | 15.85 | 18.09 | 17.06 | 15.75 |
| P21589 | NT5E    | 15.72 | 16.20 | 16.04 | 16.18 | 15.61 |
| Q02818 | NUCB1   | 17.08 | 17.06 | 19.76 | 18.79 | 15.99 |
| P80303 | NUCB2   | 17.75 | 16.51 | 19.67 | 17.59 | 17.42 |
| P20774 | OGN     | 21.87 | 22.06 | 21.67 | 21.64 | 21.56 |
| Q6UX06 | OLFM4   | 21.32 | 18.72 | 21.07 | 22.28 | 21.23 |
| P78380 | OLR1    | 15.71 | 16.52 | 16.34 | 16.95 | 16.52 |
| P02763 | ORM1    | 24.86 | 24.77 | 23.08 | 24.84 | 24.15 |
| P19652 | ORM2    | 23.62 | 23.34 | 23.62 | 23.23 | 23.02 |
| Q9BZF1 | OSBPL8  | 16.01 | 15.86 | 15.32 | 15.63 | 15.03 |
| Q92882 | OSTF1   | 18.33 | 17.61 | 20.01 | 19.06 | 19.34 |
| O95747 | OXSR1   | 16.45 | 16.39 | 16.27 | 16.43 | 16.50 |
| P07237 | P4HB    | 23.95 | 23.94 | 24.67 | 23.90 | 23.73 |
| P11940 | PABPC1  | 16.52 | 16.18 | 15.48 | 15.79 | 15.73 |

|        |         |       |       |       |       |       |
|--------|---------|-------|-------|-------|-------|-------|
| Q9UM07 | PADI4   | 18.34 | 16.45 | 17.88 | 17.81 | 18.73 |
| Q13177 | PAK2    | 15.01 | 15.59 | 15.93 | 14.98 | 15.77 |
| Q99497 | PARK7   | 16.04 | 15.52 | 16.62 | 16.79 | 16.81 |
| Q9UKK3 | PARP4   | 18.99 | 18.95 | 19.28 | 18.04 | 18.23 |
| Q9HBI0 | PARVG   | 16.07 | 16.16 | 16.86 | 16.24 | 17.15 |
| Q15365 | PCBP1   | 15.65 | 15.38 | 16.95 | 17.65 | 15.96 |
| Q15366 | PCBP2   | 15.79 | 16.52 | 16.38 | 16.69 | 16.05 |
| Q15113 | PCOLCE  | 18.60 | 18.65 | 16.88 | 17.47 | 18.26 |
| Q9UHG3 | PCYOX1  | 19.65 | 19.11 | 18.85 | 20.53 | 18.88 |
| O75340 | PDCD6   | 18.44 | 17.86 | 15.71 | 16.25 | 17.75 |
| Q8WUM4 | PDCD6IP | 18.26 | 17.91 | 19.41 | 18.14 | 17.61 |
| P30101 | PDIA3   | 23.41 | 23.32 | 23.85 | 23.08 | 23.15 |
| P13667 | PDIA4   | 18.03 | 18.78 | 20.01 | 19.30 | 17.67 |
| Q14554 | PDIA5   | 16.37 | 15.97 | 16.72 | 15.58 | 15.74 |
| Q15084 | PDIA6   | 19.45 | 18.33 | 20.76 | 19.88 | 19.32 |
| P30086 | PEBP1   | 15.77 | 16.70 | 16.82 | 16.92 | 15.98 |
| P16284 | PECAM1  | 19.61 | 19.32 | 20.75 | 19.84 | 18.73 |
| Q9UBV8 | PEF1    | 15.86 | 16.49 | 15.98 | 15.20 | 15.52 |
| P02776 | PF4     | 20.67 | 16.35 | 16.82 | 17.64 | 21.93 |
| P17858 | PFKL    | 15.51 | 16.22 | 17.45 | 17.07 | 15.91 |
| P08237 | PFKM    | 17.92 | 16.93 | 17.57 | 17.12 | 18.17 |
| P07737 | PFN1    | 22.53 | 22.73 | 22.65 | 22.49 | 22.27 |
| P18669 | PGAM1   | 16.33 | 16.93 | 17.99 | 17.37 | 17.36 |
| P52209 | PGD     | 19.19 | 19.01 | 19.77 | 18.84 | 18.81 |
| P00558 | PGK1    | 20.82 | 21.13 | 21.22 | 21.13 | 21.63 |
| O75594 | PGLYRP1 | 20.49 | 20.35 | 20.66 | 20.53 | 20.44 |
| Q96PD5 | PGLYRP2 | 18.33 | 16.17 | 19.44 | 19.57 | 17.87 |
| P36871 | PGM1    | 16.99 | 15.83 | 16.80 | 17.47 | 17.10 |
| Q96G03 | PGM2    | 15.45 | 15.70 | 15.86 | 15.25 | 16.09 |
| O00264 | PGRMC1  | 16.34 | 15.53 | 18.39 | 18.89 | 16.08 |

|        |         |       |       |       |       |       |
|--------|---------|-------|-------|-------|-------|-------|
| O43175 | PHGDH   | 16.80 | 16.02 | 17.43 | 18.03 | 15.56 |
| P46019 | PHKA2   | 16.26 | 15.58 | 16.00 | 16.19 | 15.22 |
| P01833 | PIGR    | 17.75 | 17.10 | 19.81 | 16.31 | 16.40 |
| P14618 | PKM     | 23.80 | 23.63 | 23.41 | 23.88 | 23.94 |
| P00749 | PLAU    | 15.63 | 16.25 | 16.73 | 15.90 | 15.62 |
| Q03405 | PLAUR   | 16.61 | 17.02 | 18.26 | 17.39 | 16.88 |
| Q6P4A8 | PLBD1   | 17.42 | 17.02 | 20.95 | 18.55 | 18.35 |
| P08567 | PLEK    | 17.79 | 15.43 | 18.60 | 18.00 | 17.23 |
| Q8TD55 | PLEKHO2 | 16.91 | 16.21 | 18.07 | 16.67 | 16.46 |
| P00747 | PLG     | 25.79 | 25.90 | 25.62 | 25.71 | 26.09 |
| O60240 | PLIN1   | 17.59 | 18.26 | 19.68 | 21.59 | 19.34 |
| Q96Q06 | PLIN4   | 17.78 | 17.70 | 21.21 | 21.68 | 17.13 |
| Q04941 | PLP2    | 17.82 | 19.74 | 16.25 | 15.62 | 16.39 |
| O15162 | PLSCR1  | 15.49 | 16.12 | 17.21 | 16.88 | 15.53 |
| P55058 | PLTP    | 17.07 | 16.04 | 18.48 | 17.02 | 17.37 |
| O15031 | PLXNB2  | 15.87 | 16.45 | 16.42 | 15.40 | 15.91 |
| O60486 | PLXNC1  | 16.43 | 15.59 | 18.15 | 16.69 | 15.86 |
| P00491 | PNP     | 16.39 | 17.20 | 17.36 | 16.81 | 17.31 |
| P27169 | PON1    | 19.51 | 19.16 | 21.65 | 21.13 | 22.34 |
| P16435 | POR     | 16.97 | 15.58 | 18.42 | 17.60 | 16.96 |
| Q15063 | POSTN   | 15.97 | 15.53 | 16.92 | 16.76 | 16.25 |
| P62937 | PPIA    | 20.78 | 20.85 | 21.18 | 21.15 | 20.95 |
| P23284 | PPIB    | 19.55 | 20.33 | 21.13 | 19.31 | 20.12 |
| P62136 | PPP1CA  | 17.91 | 16.85 | 17.84 | 18.60 | 17.15 |
| P67775 | PPP2CA  | 16.18 | 16.07 | 16.45 | 16.24 | 17.10 |
| P30153 | PPP2R1A | 17.11 | 15.93 | 17.51 | 17.51 | 17.06 |
| Q06830 | PRDX1   | 18.94 | 16.96 | 18.62 | 18.80 | 17.55 |
| P32119 | PRDX2   | 19.74 | 19.86 | 21.66 | 20.88 | 21.31 |
| P30048 | PRDX3   | 16.43 | 16.17 | 16.28 | 17.18 | 16.32 |
| P30044 | PRDX5   | 18.21 | 17.45 | 17.74 | 17.61 | 17.29 |



|        |         |       |       |       |       |       |
|--------|---------|-------|-------|-------|-------|-------|
| P30041 | PRDX6   | 19.95 | 20.01 | 21.25 | 20.92 | 21.05 |
| P51888 | PRELP   | 19.54 | 20.14 | 20.04 | 19.09 | 20.08 |
| Q92954 | PRG4    | 17.23 | 18.14 | 19.89 | 17.72 | 19.31 |
| P10644 | PRKAR1A | 16.37 | 15.92 | 16.54 | 16.91 | 17.13 |
| P31323 | PRKAR2B | 16.41 | 15.70 | 16.03 | 16.72 | 15.36 |
| P05771 | PRKCB   | 17.04 | 16.31 | 18.20 | 16.43 | 17.08 |
| Q05655 | PRKCD   | 16.36 | 16.20 | 17.11 | 16.91 | 17.06 |
| Q969G5 | PRKCDBP | 16.64 | 16.03 | 15.84 | 17.37 | 15.86 |
| P14314 | PRKCSH  | 20.05 | 19.29 | 20.61 | 19.79 | 19.53 |
| P78527 | PRKDC   | 16.97 | 15.90 | 17.03 | 16.34 | 16.65 |
| P04070 | PROC    | 19.74 | 17.07 | 15.80 | 19.94 | 19.53 |
| P07225 | PROS1   | 24.52 | 24.28 | 22.97 | 23.78 | 24.05 |
| P22891 | PROZ    | 21.14 | 19.33 | 17.46 | 20.09 | 19.45 |
| Q6P2Q9 | PRPF8   | 16.42 | 15.47 | 16.27 | 16.11 | 15.57 |
| P60891 | PRPS1   | 17.25 | 15.38 | 16.08 | 16.71 | 16.78 |
| Q96M27 | PRRC1   | 15.88 | 16.49 | 16.70 | 15.79 | 15.61 |
| P24158 | PRTN3   | 19.60 | 20.04 | 18.78 | 19.63 | 19.82 |
| P07602 | PSAP    | 18.42 | 18.16 | 16.98 | 18.79 | 16.44 |
| P25786 | PSMA1   | 16.56 | 15.36 | 17.56 | 15.45 | 16.59 |
| P25787 | PSMA2   | 17.08 | 16.74 | 18.10 | 18.26 | 16.70 |
| P25789 | PSMA4   | 16.06 | 16.46 | 17.02 | 15.95 | 16.28 |
| P28066 | PSMA5   | 17.68 | 15.38 | 18.40 | 20.19 | 18.71 |
| P60900 | PSMA6   | 17.25 | 17.79 | 18.64 | 18.42 | 16.13 |
| O14818 | PSMA7   | 16.53 | 16.34 | 16.85 | 16.68 | 16.39 |
| P20618 | PSMB1   | 16.04 | 16.23 | 16.70 | 15.72 | 15.80 |
| P49720 | PSMB3   | 16.62 | 15.45 | 17.17 | 16.44 | 15.65 |
| P28070 | PSMB4   | 16.54 | 16.12 | 16.98 | 17.15 | 15.75 |
| P28065 | PSMB9   | 16.41 | 16.49 | 17.37 | 15.49 | 17.13 |
| P35998 | PSMC2   | 16.66 | 15.69 | 16.34 | 16.85 | 16.39 |
| P43686 | PSMC4   | 15.24 | 16.39 | 15.70 | 16.13 | 15.17 |

|        |        |       |       |       |       |       |
|--------|--------|-------|-------|-------|-------|-------|
| P62195 | PSMC5  | 16.51 | 16.15 | 16.16 | 16.61 | 16.21 |
| P62333 | PSMC6  | 16.48 | 16.00 | 16.49 | 16.09 | 16.45 |
| Q99460 | PSMD1  | 17.09 | 16.33 | 16.69 | 16.48 | 16.46 |
| O00231 | PSMD11 | 16.95 | 16.72 | 16.22 | 17.03 | 15.61 |
| O00232 | PSMD12 | 15.94 | 15.97 | 15.78 | 15.94 | 15.46 |
| Q13200 | PSMD2  | 16.30 | 16.53 | 16.81 | 17.04 | 15.87 |
| Q06323 | PSME1  | 15.84 | 15.56 | 16.27 | 16.02 | 16.09 |
| P26599 | PTBP1  | 16.17 | 16.40 | 17.17 | 16.28 | 15.11 |
| Q15185 | PTGES3 | 16.99 | 15.88 | 16.05 | 17.90 | 16.03 |
| Q16647 | PTGIS  | 15.70 | 16.00 | 16.41 | 16.24 | 15.53 |
| Q14289 | PTK2B  | 15.91 | 15.42 | 15.91 | 17.06 | 15.87 |
| P29350 | PTPN6  | 18.09 | 16.87 | 19.59 | 18.58 | 20.17 |
| P08575 | PTPRC  | 23.30 | 23.45 | 24.08 | 23.50 | 23.03 |
| Q12913 | PTPRJ  | 19.20 | 19.62 | 20.85 | 19.95 | 19.76 |
| Q6NZI2 | PTRF   | 18.74 | 16.80 | 19.97 | 22.44 | 19.80 |
| P26022 | PTX3   | 17.21 | 16.34 | 17.18 | 16.53 | 17.00 |
| P49023 | PXN    | 15.85 | 15.49 | 16.96 | 15.38 | 16.19 |
| P06737 | PYGL   | 17.48 | 15.70 | 18.24 | 17.92 | 17.29 |
| P11217 | PYGM   | 21.33 | 20.39 | 20.52 | 20.14 | 20.84 |
| P20742 | PZP    | 18.14 | 17.25 | 17.17 | 20.51 | 17.38 |
| Q16769 | QPCT   | 16.22 | 16.03 | 15.90 | 16.17 | 16.44 |
| O00391 | QSOX1  | 16.00 | 16.21 | 18.55 | 15.20 | 16.28 |
| P61026 | RAB10  | 17.02 | 15.70 | 20.33 | 18.22 | 17.61 |
| Q15907 | RAB11B | 16.39 | 17.78 | 17.79 | 18.01 | 16.34 |
| P61106 | RAB14  | 17.18 | 15.53 | 18.33 | 17.28 | 16.86 |
| Q9H0U4 | RAB1B  | 19.10 | 17.71 | 20.50 | 19.10 | 20.13 |
| P51159 | RAB27A | 19.70 | 19.60 | 20.61 | 19.44 | 19.98 |
| P61019 | RAB2A  | 16.31 | 16.12 | 16.30 | 16.80 | 15.56 |
| Q13636 | RAB31  | 16.18 | 15.43 | 16.37 | 17.13 | 14.83 |
| Q15286 | RAB35  | 16.37 | 15.53 | 16.71 | 15.70 | 15.52 |

|        |        |       |       |       |       |       |
|--------|--------|-------|-------|-------|-------|-------|
| P51148 | RAB5C  | 18.69 | 18.00 | 18.87 | 17.26 | 16.97 |
| P20340 | RAB6A  | 16.78 | 15.31 | 16.43 | 15.27 | 16.74 |
| P51149 | RAB7A  | 19.72 | 20.13 | 20.30 | 20.06 | 20.00 |
| P61006 | RAB8A  | 16.65 | 16.44 | 18.79 | 17.22 | 16.89 |
| Q92930 | RAB8B  | 15.98 | 16.57 | 19.24 | 18.08 | 17.39 |
| P63000 | RAC1   | 15.66 | 16.54 | 17.19 | 15.23 | 15.49 |
| P15153 | RAC2   | 22.03 | 22.80 | 22.18 | 21.93 | 22.19 |
| P11234 | RALB   | 15.75 | 16.20 | 17.95 | 17.67 | 16.11 |
| P62826 | RAN    | 20.23 | 20.17 | 19.29 | 19.11 | 20.15 |
| P62834 | RAP1A  | 15.87 | 16.16 | 17.56 | 16.95 | 15.66 |
| P61224 | RAP1B  | 21.90 | 22.17 | 22.00 | 21.65 | 21.66 |
| P61225 | RAP2B  | 17.71 | 16.67 | 19.47 | 17.91 | 17.72 |
| P02753 | RBP4   | 17.64 | 16.59 | 20.30 | 18.10 | 20.20 |
| Q00765 | REEP5  | 18.01 | 16.25 | 18.71 | 17.49 | 16.28 |
| O15258 | RER1   | 16.69 | 16.92 | 17.30 | 15.96 | 15.75 |
| P49795 | RGS19  | 16.45 | 18.15 | 19.02 | 17.77 | 17.32 |
| P18577 | RHCE   | 18.02 | 18.58 | 16.29 | 16.88 | 17.09 |
| P61586 | RHOA   | 20.37 | 21.09 | 20.07 | 20.57 | 20.23 |
| P84095 | RHOG   | 19.23 | 21.04 | 20.75 | 20.24 | 19.62 |
| P07998 | RNASE1 | 16.78 | 15.71 | 16.95 | 15.22 | 16.27 |
| P12724 | RNASE3 | 16.69 | 15.32 | 17.06 | 16.96 | 16.00 |
| P13489 | RNH1   | 15.70 | 16.36 | 17.01 | 16.24 | 15.63 |
| Q9H4A4 | RNPEP  | 15.06 | 15.61 | 16.41 | 17.05 | 17.33 |
| O75695 | RP2    | 18.22 | 18.06 | 19.38 | 18.55 | 17.82 |
| P62913 | RPL11  | 15.12 | 15.70 | 15.94 | 16.22 | 16.61 |
| P05388 | RPLP0  | 16.99 | 16.30 | 17.38 | 17.29 | 16.52 |
| P05387 | RPLP2  | 15.86 | 16.05 | 15.87 | 17.51 | 16.78 |
| P04843 | RPN1   | 20.80 | 20.63 | 21.40 | 20.60 | 20.40 |
| P04844 | RPN2   | 17.79 | 16.13 | 20.79 | 18.48 | 18.59 |
| P62277 | RPS13  | 15.74 | 16.31 | 16.99 | 16.66 | 15.95 |

|        |         |       |       |       |       |       |
|--------|---------|-------|-------|-------|-------|-------|
| P62249 | RPS16   | 16.63 | 15.98 | 17.37 | 16.62 | 16.35 |
| P62269 | RPS18   | 17.08 | 17.12 | 16.00 | 16.43 | 15.89 |
| P15880 | RPS2    | 17.18 | 16.06 | 17.06 | 16.00 | 15.96 |
| P23396 | RPS3    | 15.91 | 15.80 | 15.51 | 16.64 | 15.75 |
| P62701 | RPS4X   | 17.07 | 17.82 | 17.82 | 17.91 | 15.29 |
| P62753 | RPS6    | 16.14 | 16.16 | 16.00 | 15.08 | 15.80 |
| P08865 | RPSA    | 16.35 | 16.05 | 15.86 | 16.38 | 17.17 |
| P10301 | RRAS    | 15.92 | 15.96 | 16.74 | 17.96 | 16.20 |
| Q15404 | RSU1    | 16.84 | 16.44 | 17.05 | 17.28 | 16.55 |
| Q9NQC3 | RTN4    | 20.58 | 20.80 | 20.69 | 20.58 | 20.40 |
| Q9Y265 | RUVBL1  | 15.96 | 15.69 | 15.70 | 16.52 | 15.78 |
| P60903 | S100A10 | 21.81 | 21.62 | 21.77 | 22.12 | 19.96 |
| P31949 | S100A11 | 20.53 | 20.07 | 22.20 | 21.84 | 21.67 |
| P80511 | S100A12 | 22.66 | 23.09 | 20.57 | 22.53 | 21.99 |
| P26447 | S100A4  | 19.24 | 21.02 | 20.39 | 17.92 | 18.60 |
| P06703 | S100A6  | 18.33 | 20.74 | 20.26 | 20.89 | 19.32 |
| P31151 | S100A7  | 15.28 | 17.34 | 16.42 | 16.47 | 18.30 |
| P05109 | S100A8  | 24.77 | 25.49 | 24.00 | 24.85 | 24.41 |
| P06702 | S100A9  | 25.41 | 26.05 | 25.17 | 25.46 | 25.36 |
| P35542 | SAA4    | 15.78 | 15.57 | 16.04 | 16.26 | 16.60 |
| Q9NTJ5 | SACM1L  | 18.21 | 18.44 | 20.08 | 17.38 | 18.18 |
| Q9Y3Z3 | SAMHD1  | 18.46 | 17.75 | 18.61 | 17.71 | 18.50 |
| O15127 | SCAMP2  | 17.75 | 16.97 | 18.29 | 16.69 | 16.50 |
| Q14108 | SCARB2  | 16.06 | 15.82 | 16.49 | 16.64 | 15.80 |
| P22307 | SCP2    | 17.60 | 17.22 | 17.74 | 17.59 | 16.25 |
| O00560 | SDCBP   | 21.67 | 21.89 | 21.83 | 21.70 | 22.05 |
| O95810 | SDPR    | 16.79 | 15.58 | 15.79 | 16.89 | 15.88 |
| P67812 | SEC11A  | 17.17 | 17.22 | 18.03 | 16.58 | 16.83 |
| O75396 | SEC22B  | 18.31 | 17.45 | 19.42 | 18.10 | 17.00 |
| Q9UGP8 | SEC63   | 14.91 | 16.14 | 16.97 | 15.07 | 15.78 |

|        |           |       |       |       |       |       |
|--------|-----------|-------|-------|-------|-------|-------|
| Q13228 | SELENBP1  | 17.15 | 16.69 | 17.10 | 18.20 | 16.65 |
| P49908 | SEPP1     | 18.56 | 17.34 | 19.70 | 17.59 | 17.97 |
| Q9NVA2 | SEPT11    | 16.37 | 15.44 | 15.85 | 16.14 | 15.45 |
| P01009 | SERPINA1  | 25.82 | 25.80 | 25.45 | 26.06 | 26.42 |
| Q9UK55 | SERPINA10 | 18.78 | 17.54 | 18.76 | 19.39 | 18.62 |
| P01011 | SERPINA3  | 26.25 | 26.77 | 25.32 | 26.17 | 26.33 |
| P29622 | SERPINA4  | 18.29 | 17.62 | 19.25 | 18.01 | 18.69 |
| P05154 | SERPINA5  | 16.99 | 15.86 | 17.57 | 17.24 | 16.80 |
| P30740 | SERPINB1  | 19.85 | 20.15 | 20.69 | 20.27 | 19.49 |
| P01008 | SERPINC1  | 22.71 | 22.64 | 22.62 | 21.95 | 22.76 |
| P05546 | SERPIND1  | 23.08 | 23.73 | 23.43 | 23.05 | 23.80 |
| P36955 | SERPINF1  | 21.51 | 21.01 | 22.03 | 23.14 | 22.24 |
| P08697 | SERPINF2  | 21.78 | 21.78 | 22.72 | 21.64 | 22.13 |
| P05155 | SERPING1  | 22.03 | 22.60 | 21.26 | 22.32 | 21.69 |
| P50454 | SERPINH1  | 16.39 | 15.49 | 16.22 | 16.50 | 15.35 |
| Q01105 | SET       | 17.64 | 16.42 | 15.81 | 18.50 | 17.28 |
| P04278 | SHBG      | 16.35 | 16.34 | 16.77 | 15.89 | 17.16 |
| O15389 | SIGLEC5   | 17.60 | 16.51 | 19.52 | 18.46 | 16.75 |
| Q9Y336 | SIGLEC9   | 16.23 | 15.47 | 17.89 | 15.58 | 15.38 |
| P78324 | SIRPA     | 16.80 | 16.07 | 19.35 | 17.33 | 19.47 |
| O15427 | SLC16A3   | 17.20 | 19.73 | 16.04 | 16.37 | 16.48 |
| Q00325 | SLC25A3   | 16.99 | 16.59 | 17.46 | 16.99 | 16.07 |
| P05141 | SLC25A5   | 16.24 | 16.06 | 16.75 | 16.60 | 15.69 |
| O14975 | SLC27A2   | 15.82 | 16.06 | 17.19 | 16.55 | 16.24 |
| P11166 | SLC2A1    | 21.83 | 22.32 | 21.10 | 21.18 | 20.57 |
| P11169 | SLC2A3    | 20.19 | 20.75 | 20.46 | 18.83 | 19.85 |
| P08195 | SLC3A2    | 15.74 | 16.50 | 18.36 | 17.39 | 15.69 |
| Q8WWI5 | SLC44A1   | 16.06 | 16.23 | 17.46 | 15.84 | 15.35 |
| Q8IWA5 | SLC44A2   | 16.70 | 17.65 | 17.00 | 16.43 | 16.24 |
| P02730 | SLC4A1    | 25.33 | 25.52 | 24.73 | 24.90 | 24.39 |

|        |        |       |       |       |       |       |
|--------|--------|-------|-------|-------|-------|-------|
| A6NHR9 | SMCHD1 | 16.02 | 16.29 | 17.32 | 16.19 | 17.38 |
| O00161 | SNAP23 | 15.71 | 15.79 | 18.13 | 17.44 | 15.41 |
| P04179 | SOD2   | 16.15 | 15.79 | 17.01 | 16.25 | 16.09 |
| P08294 | SOD3   | 16.80 | 16.90 | 16.69 | 18.17 | 15.84 |
| Q92673 | SORL1  | 16.76 | 16.79 | 17.93 | 15.81 | 16.71 |
| Q15005 | SPCS2  | 16.21 | 16.13 | 17.02 | 15.74 | 15.77 |
| P16150 | SPN    | 17.56 | 17.62 | 19.86 | 17.89 | 15.39 |
| P10451 | SPP1   | 16.32 | 15.86 | 15.96 | 16.24 | 15.77 |
| Q13103 | SPP2   | 20.94 | 17.06 | 17.92 | 20.90 | 20.15 |
| P02549 | SPTA1  | 21.43 | 20.55 | 22.47 | 21.76 | 20.03 |
| Q13813 | SPTAN1 | 17.00 | 17.99 | 20.32 | 19.25 | 17.02 |
| P11277 | SPTB   | 21.47 | 21.12 | 22.33 | 21.89 | 19.88 |
| Q01082 | SPTBN1 | 17.28 | 15.36 | 18.39 | 17.86 | 16.58 |
| Q6ZRS2 | SRCAP  | 17.15 | 18.20 | 17.02 | 18.21 | 17.20 |
| P30626 | SRI    | 21.65 | 21.10 | 20.92 | 20.43 | 20.07 |
| Q9Y5M8 | SRPRB  | 15.47 | 16.58 | 17.10 | 15.77 | 15.99 |
| Q07955 | SRSF1  | 19.01 | 16.41 | 15.45 | 18.26 | 18.23 |
| Q01130 | SRSF2  | 18.78 | 17.15 | 15.84 | 17.94 | 17.86 |
| Q16629 | SRSF7  | 17.62 | 17.41 | 15.88 | 17.34 | 16.99 |
| P43307 | SSR1   | 15.59 | 16.87 | 16.92 | 16.89 | 16.49 |
| Q08945 | SSRP1  | 15.21 | 16.89 | 16.47 | 16.14 | 14.87 |
| P50502 | ST13   | 17.54 | 16.14 | 15.84 | 17.12 | 17.48 |
| Q687X5 | STEAP4 | 16.54 | 17.29 | 17.78 | 16.87 | 16.24 |
| Q13586 | STIM1  | 16.10 | 16.14 | 17.71 | 16.71 | 16.99 |
| O94804 | STK10  | 16.27 | 16.27 | 17.05 | 16.45 | 16.66 |
| P27105 | STOM   | 23.53 | 23.64 | 23.24 | 23.16 | 23.23 |
| P46977 | STT3A  | 15.84 | 16.63 | 16.34 | 16.27 | 16.19 |
| Q8TCJ2 | STT3B  | 15.83 | 15.99 | 16.48 | 15.95 | 16.45 |
| O75558 | STX11  | 15.71 | 15.69 | 17.74 | 15.82 | 15.85 |
| Q13277 | STX3   | 15.47 | 15.41 | 17.54 | 16.10 | 15.49 |

|        |         |       |       |       |       |       |
|--------|---------|-------|-------|-------|-------|-------|
| O15400 | STX7    | 17.19 | 17.23 | 17.64 | 18.15 | 16.56 |
| Q15833 | STXBP2  | 17.48 | 16.97 | 19.29 | 18.07 | 17.42 |
| O00186 | STXBP3  | 15.42 | 15.02 | 17.39 | 15.37 | 15.76 |
| P53999 | SUB1    | 17.05 | 16.20 | 17.13 | 16.67 | 15.77 |
| P50225 | SULT1A1 | 16.31 | 15.56 | 17.63 | 17.71 | 17.58 |
| Q8NBJ7 | SUMF2   | 15.82 | 15.91 | 16.79 | 16.28 | 15.94 |
| Q9UH99 | SUN2    | 17.45 | 15.98 | 19.43 | 17.53 | 18.86 |
| O15260 | SURF4   | 17.58 | 18.15 | 18.32 | 16.79 | 16.29 |
| P43405 | SYK     | 16.08 | 15.91 | 16.41 | 15.62 | 15.46 |
| Q01995 | TAGLN   | 15.72 | 16.82 | 16.96 | 15.86 | 16.83 |
| P37802 | TAGLN2  | 17.08 | 16.35 | 18.79 | 17.71 | 17.36 |
| P37837 | TALDO1  | 15.81 | 17.03 | 15.39 | 15.60 | 16.24 |
| O15533 | TAPBP   | 16.61 | 15.62 | 17.09 | 16.04 | 16.07 |
| P24557 | TBXAS1  | 17.63 | 17.32 | 18.61 | 16.21 | 17.46 |
| Q13488 | TCIRG1  | 17.09 | 16.08 | 17.77 | 17.24 | 15.96 |
| P20061 | TCN1    | 15.77 | 16.05 | 16.29 | 17.10 | 15.91 |
| P17987 | TCP1    | 17.38 | 16.55 | 16.52 | 17.17 | 16.53 |
| Q9NZ01 | TECR    | 16.86 | 16.57 | 17.28 | 18.07 | 15.22 |
| P02787 | TF      | 27.21 | 27.17 | 27.21 | 27.47 | 27.48 |
| P02786 | TFRC    | 16.31 | 16.85 | 15.66 | 16.16 | 15.91 |
| Q15582 | TGFBI   | 17.77 | 17.46 | 20.67 | 18.34 | 18.75 |
| P21980 | TGM2    | 16.24 | 16.85 | 16.04 | 15.98 | 15.92 |
| P07996 | THBS1   | 20.01 | 16.86 | 16.82 | 15.89 | 18.28 |
| P35443 | THBS4   | 16.61 | 15.84 | 15.68 | 15.44 | 15.66 |
| P04216 | THY1    | 16.15 | 16.44 | 17.66 | 17.07 | 15.68 |
| P01033 | TIMP1   | 16.37 | 18.41 | 19.28 | 17.35 | 17.79 |
| P29401 | TKT     | 19.38 | 19.08 | 20.46 | 20.19 | 19.35 |
| Q9Y490 | TLN1    | 21.05 | 20.55 | 22.31 | 21.60 | 21.12 |
| O60603 | TLR2    | 19.06 | 18.08 | 20.35 | 17.52 | 17.71 |
| Q9NR97 | TLR8    | 16.15 | 15.94 | 15.96 | 16.51 | 16.49 |

|        |          |       |       |       |       |       |
|--------|----------|-------|-------|-------|-------|-------|
| Q99805 | TM9SF2   | 16.02 | 16.11 | 15.64 | 16.17 | 15.66 |
| Q9HD45 | TM9SF3   | 16.61 | 15.07 | 16.70 | 16.78 | 16.34 |
| Q9UM00 | TMCO1    | 15.63 | 15.78 | 17.50 | 15.67 | 16.34 |
| P49755 | TMED10   | 18.95 | 17.06 | 20.24 | 17.73 | 18.88 |
| Q15363 | TMED2    | 16.96 | 17.56 | 18.42 | 17.86 | 17.42 |
| Q9Y3A6 | TMED5    | 16.26 | 16.28 | 17.81 | 16.40 | 16.77 |
| Q9Y3B3 | TMED7    | 17.56 | 17.86 | 17.42 | 16.08 | 16.72 |
| Q9BVK6 | TMED9    | 18.75 | 17.80 | 18.33 | 16.73 | 17.10 |
| Q86WV6 | TMEM173  | 15.99 | 15.89 | 18.21 | 17.13 | 15.66 |
| Q9NV96 | TMEM30A  | 16.22 | 16.71 | 17.08 | 16.04 | 17.13 |
| P57088 | TMEM33   | 16.12 | 15.80 | 16.19 | 15.99 | 15.84 |
| Q9BTV4 | TMEM43   | 18.34 | 18.02 | 18.81 | 18.57 | 17.95 |
| O94886 | TMEM63A  | 15.85 | 15.54 | 16.44 | 15.85 | 16.12 |
| Q9H3N1 | TMX1     | 18.60 | 18.69 | 18.76 | 17.82 | 16.70 |
| Q96JJ7 | TMX3     | 16.35 | 15.78 | 17.08 | 16.08 | 16.71 |
| Q9H1E5 | TMX4     | 15.69 | 16.01 | 17.28 | 15.50 | 16.12 |
| O95379 | TNFAIP8  | 16.02 | 15.56 | 16.29 | 16.86 | 14.46 |
| P63316 | TNNC1    | 16.74 | 15.92 | 15.54 | 16.00 | 16.27 |
| P02585 | TNNC2    | 18.07 | 16.26 | 16.69 | 17.17 | 15.73 |
| P19237 | TNNI1    | 17.15 | 16.68 | 16.60 | 17.49 | 16.50 |
| P22105 | TNXB     | 16.54 | 19.10 | 18.97 | 18.03 | 15.63 |
| O60784 | TOM1     | 16.67 | 15.30 | 17.55 | 17.10 | 16.77 |
| Q5JTV8 | TOR1AIP1 | 18.33 | 18.13 | 19.86 | 18.86 | 19.28 |
| O14683 | TP53I11  | 15.55 | 16.12 | 16.67 | 15.34 | 15.14 |
| P60174 | TPI1     | 19.67 | 19.33 | 19.78 | 19.22 | 18.24 |
| P09493 | TPM1     | 17.24 | 15.95 | 18.23 | 15.92 | 18.15 |
| P06753 | TPM3     | 17.78 | 16.23 | 19.67 | 17.81 | 18.39 |
| O14773 | TPP1     | 16.33 | 15.33 | 17.12 | 17.55 | 16.13 |
| P29144 | TPP2     | 17.54 | 18.89 | 15.49 | 16.04 | 15.23 |
| Q8NG11 | TSPAN14  | 15.87 | 15.48 | 16.68 | 16.35 | 16.20 |



|        |         |       |       |       |       |       |
|--------|---------|-------|-------|-------|-------|-------|
| P30536 | TSPO    | 17.11 | 15.70 | 20.00 | 15.56 | 17.06 |
| Q8WZ42 | TTN     | 21.52 | 20.00 | 20.86 | 19.18 | 20.05 |
| P02766 | TTR     | 21.39 | 21.39 | 21.55 | 20.96 | 22.83 |
| P68363 | TUBA1B  | 22.33 | 22.74 | 22.29 | 22.92 | 22.69 |
| P68366 | TUBA4A  | 17.69 | 16.59 | 18.99 | 18.05 | 18.54 |
| P07437 | TUBB    | 20.23 | 20.22 | 20.32 | 20.39 | 20.10 |
| P68371 | TUBB4B  | 22.60 | 22.85 | 22.54 | 23.03 | 22.69 |
| P10599 | TXN     | 17.18 | 16.00 | 16.39 | 17.14 | 15.67 |
| Q8NBS9 | TXNDC5  | 16.05 | 15.54 | 17.82 | 17.58 | 16.79 |
| Q9H3M7 | TXNIP   | 15.92 | 16.75 | 15.93 | 16.24 | 16.79 |
| P19971 | TYMP    | 15.47 | 16.59 | 17.42 | 17.19 | 16.48 |
| O43914 | TYROBP  | 16.07 | 15.62 | 16.80 | 16.15 | 15.98 |
| P22314 | UBA1    | 16.76 | 15.86 | 17.62 | 17.59 | 17.70 |
| P62987 | UBA52   | 23.47 | 23.93 | 22.75 | 23.26 | 23.29 |
| P61088 | UBE2N   | 15.48 | 16.20 | 15.74 | 16.05 | 15.51 |
| Q5T4S7 | UBR4    | 16.34 | 16.38 | 16.05 | 15.94 | 15.03 |
| Q9NYU2 | UGGT1   | 17.25 | 16.56 | 18.69 | 17.82 | 17.12 |
| Q16851 | UGP2    | 17.92 | 16.55 | 19.20 | 19.48 | 18.13 |
| P22695 | UQCRC2  | 15.55 | 15.62 | 16.36 | 15.97 | 16.30 |
| P47985 | UQCRFS1 | 15.27 | 16.28 | 16.24 | 16.15 | 16.06 |
| Q15836 | VAMP3   | 16.53 | 14.96 | 17.68 | 16.34 | 15.67 |
| P51809 | VAMP7   | 15.99 | 15.53 | 16.40 | 15.68 | 15.33 |
| Q9P0L0 | VAPA    | 16.35 | 16.06 | 17.67 | 16.37 | 15.37 |
| P50552 | VASP    | 17.39 | 18.45 | 18.86 | 18.65 | 18.73 |
| Q99536 | VAT1    | 17.07 | 17.86 | 18.79 | 18.16 | 17.86 |
| P15498 | VAV1    | 15.66 | 16.38 | 15.81 | 15.49 | 16.43 |
| P18206 | VCL     | 18.04 | 16.08 | 20.09 | 18.42 | 17.93 |
| P55072 | VCP     | 20.72 | 21.13 | 22.50 | 20.46 | 20.73 |
| P45880 | VDAC2   | 16.33 | 15.75 | 16.04 | 16.73 | 15.66 |
| P08670 | VIM     | 22.74 | 22.87 | 23.52 | 23.76 | 23.06 |

|        |           |       |       |       |       |       |
|--------|-----------|-------|-------|-------|-------|-------|
| Q96GC9 | VMP1      | 16.03 | 15.66 | 15.95 | 15.57 | 15.86 |
| O95497 | VNN1      | 16.40 | 16.07 | 19.67 | 16.49 | 16.20 |
| O95498 | VNN2      | 22.14 | 21.47 | 22.87 | 22.63 | 21.36 |
| Q96QK1 | VPS35     | 15.58 | 15.49 | 16.23 | 17.23 | 15.80 |
| P04004 | VTN       | 27.26 | 27.84 | 27.09 | 27.47 | 28.09 |
| P04275 | VWF       | 16.90 | 16.63 | 20.31 | 19.00 | 18.18 |
| Q9Y6W5 | WASF2     | 16.50 | 15.87 | 18.37 | 16.85 | 16.94 |
| O75083 | WDR1      | 19.41 | 18.89 | 19.06 | 19.69 | 19.47 |
| P13010 | XRCC5     | 17.66 | 17.16 | 18.99 | 18.14 | 18.15 |
| P12956 | XRCC6     | 16.91 | 16.01 | 18.35 | 17.17 | 17.12 |
| P67809 | YBX1      | 16.35 | 16.22 | 16.60 | 17.21 | 15.28 |
| P31946 | YWHAB     | 18.52 | 18.47 | 19.60 | 18.25 | 18.18 |
| P62258 | YWHAE     | 16.96 | 16.41 | 19.18 | 17.53 | 15.73 |
| P61981 | YWHAG     | 16.11 | 15.26 | 17.43 | 17.13 | 16.86 |
| Q04917 | YWHAH     | 16.23 | 17.05 | 18.35 | 17.19 | 17.38 |
| P27348 | YWHAQ     | 15.60 | 14.98 | 15.70 | 17.30 | 15.84 |
| P63104 | YWHAZ     | 21.64 | 20.83 | 22.13 | 21.62 | 21.17 |
| Q15942 | ZYX       | 16.36 | 15.06 | 18.31 | 16.78 | 16.71 |
| P01598 | IGKV1-5   | 23.31 | 23.36 | 21.54 | 21.20 | 21.03 |
| P01610 | IGKV1-17  | 22.35 | 23.09 | 21.47 | 22.62 | 22.16 |
| P01611 | IGKV1D-12 | 17.79 | 18.54 | 15.91 | 16.97 | 17.37 |
| P01612 | IGKV1-39  | 15.97 | 15.94 | 16.64 | 16.79 | 16.38 |
| P01613 | IGKV1D-33 | 19.33 | 20.31 | 19.79 | 20.52 | 20.28 |
| P01617 | IGKV2D-28 | 21.36 | 22.02 | 20.87 | 21.06 | 21.21 |
| P01619 | IGKV3-20  | 17.04 | 16.51 | 17.31 | 18.07 | 17.65 |
| P01620 | IGKV3-20  | 25.04 | 25.29 | 24.83 | 24.82 | 24.83 |
| P01621 | IGKV3-20  | 20.70 | 22.67 | 22.67 | 22.82 | 22.89 |
| P01624 | IGKV3-15  | 15.89 | 15.17 | 16.19 | 16.06 | 15.67 |
| P01625 | IGKV4-1   | 25.16 | 24.73 | 23.71 | 23.74 | 24.19 |
| P01700 | IGLV1-47  | 17.35 | 16.40 | 17.87 | 18.65 | 16.57 |

|        |           |       |       |       |       |       |
|--------|-----------|-------|-------|-------|-------|-------|
| P01702 | IGLV1-51  | 19.97 | 20.60 | 16.19 | 16.47 | 15.81 |
| P01708 | IGLV2-11  | 18.48 | 18.17 | 16.84 | 18.67 | 18.46 |
| P01714 | IGLV3-19  | 18.09 | 15.68 | 21.91 | 18.72 | 20.69 |
| P01717 | IGLV3-25  | 16.59 | 21.11 | 15.52 | 17.20 | 17.04 |
| P01743 | IGHV1-46  | 21.71 | 22.95 | 21.56 | 22.03 | 20.32 |
| P01765 | IGHV3-23  | 17.93 | 16.29 | 22.23 | 18.66 | 19.60 |
| P01766 | IGHV3-13  | 25.27 | 25.08 | 24.09 | 24.92 | 25.11 |
| P01769 | IGHV3-30  | 17.38 | 17.93 | 16.70 | 18.20 | 16.11 |
| P01781 | IGHV3-7   | 23.50 | 22.35 | 22.31 | 22.96 | 23.34 |
| P04207 | IGKV3-15  | 22.64 | 21.22 | 21.78 | 20.85 | 22.83 |
| P04208 | IGLV1-47  | 18.05 | 19.32 | 15.89 | 15.71 | 18.33 |
| P04209 | IGLV2-14  | 16.59 | 16.67 | 15.96 | 16.51 | 15.44 |
| P04211 | IGLV7-43  | 15.45 | 17.14 | 16.42 | 15.44 | 16.94 |
| P04220 | IGHM      | 24.97 | 24.31 | 23.73 | 23.92 | 24.29 |
| P04430 | IGKV1-16  | 16.78 | 17.66 | 15.69 | 16.30 | 15.73 |
| P04433 | IGKV3-11  | 22.12 | 21.20 | 22.74 | 22.75 | 22.99 |
| P04438 | IGHV2-70  | 16.36 | 16.37 | 18.63 | 15.39 | 15.79 |
| P06309 | IGKV2D-28 | 19.85 | 20.68 | 18.77 | 19.74 | 19.79 |
| P06310 | IGKV2-30  | 23.67 | 23.64 | 23.09 | 23.11 | 23.23 |
| P06311 | IGKV3-20  | 16.59 | 15.24 | 19.66 | 17.10 | 17.06 |
| P06331 | IGHV4-34  | 21.58 | 22.26 | 20.83 | 20.69 | 20.75 |
| P23083 | IGHV1-2   | 20.39 | 19.53 | 19.18 | 20.34 | 16.96 |
| P80419 | IGHV3-7   | 17.74 | 16.59 | 16.97 | 16.18 | 16.85 |
| P80748 | IGLV3-21  | 23.81 | 24.49 | 23.14 | 23.63 | 22.48 |
