# Supplementary material for: Use of extracellular vesicles from lymphatic drainage as surrogate markers of melanoma progression and BRAFV600E mutation
Source: PubMed Central journal article supplement — J Exp Med. 2019 Apr 11;216(5):1061–70. doi: 10.1084/jem.20181522 (PMC6504207; doi:10.1084/jem.20181522), 2019-04-11
Supplement: JEM_20181522_TableS8.pdf [file JEM_20181522_TableS8.pdf]

**Table S8. Proteins found in melanoma patient ES-derived exosomes not found in human lymph data sets**

| Entry  | Entry name  | Protein names                                                  | Gene     |
|--------|-------------|----------------------------------------------------------------|----------|
| Q8IZP0 | ABI1_HUMAN  | Abl interactor 1                                               | ABI1     |
| Q7Z7G0 | TARSH_HUMAN | Target of Nesh-SH3                                             | ABI3BP   |
| P09110 | THIK_HUMAN  | 3-ketoacyl-CoA thiolase                                        | ACAA1    |
| P53396 | ACLY_HUMAN  | ATP-citrate synthase                                           | ACLY     |
| P21399 | ACOC_HUMAN  | Cytoplasmic aconitate hydratase                                | ACO1     |
| Q15067 | ACOX1_HUMAN | Peroxisomal acyl-coenzyme A oxidase 1                          | ACOX1    |
| P33121 | ACSL1_HUMAN | Long-chain-fatty-acid--CoA ligase 1                            | ACSL1    |
| O95573 | ACSL3_HUMAN | Long-chain-fatty-acid--CoA ligase 3                            | ACSL3    |
| O60488 | ACSL4_HUMAN | Long-chain-fatty-acid--CoA ligase 4                            | ACSL4    |
| P35609 | ACTN2_HUMAN | Alpha-actinin-2                                                | ACTN2    |
| Q08043 | ACTN3_HUMAN | Alpha-actinin-3                                                | ACTN3    |
| P61163 | ACTZ_HUMAN  | Alpha-centractin                                               | ACTR1A   |
| P61160 | ARP2_HUMAN  | Actin-related protein 2                                        | ACTR2    |
| P61158 | ARP3_HUMAN  | Actin-related protein 3                                        | ACTR3    |
| O14672 | ADA10_HUMAN | Disintegrin and metalloproteinase domain-containing protein 10 | ADAM10   |
| P35611 | ADDA_HUMAN  | Alpha-adducin                                                  | ADD1     |
| Q9BRR6 | ADPGK_HUMAN | ADP-dependent glucokinase                                      | ADPGK    |
| P35573 | GDE_HUMAN   | Glycogen debranching enzyme                                    | AGL      |
| O15120 | PLCB_HUMAN  | 1-acyl-sn-glycerol-3-phosphate acyltransferase beta            | AGPAT2   |
| Q53EU6 | GPAT3_HUMAN | Glycerol-3-phosphate acyltransferase 3                         | GPAT3    |
| O00116 | ADAS_HUMAN  | Alkyldihydroxyacetonephosphate synthase                        | AGPS     |
| Q09666 | AHNK_HUMAN  | Neuroblast differentiation-associated protein AHNAK            | AHNAK    |
| P54819 | KAD2_HUMAN  | Adenylate kinase 2                                             | AK2      |
| Q8IZ83 | A16A1_HUMAN | Aldehyde dehydrogenase family 16 member A1                     | ALDH16A1 |
| P51648 | AL3A2_HUMAN | Fatty aldehyde dehydrogenase                                   | ALDH3A2  |
| P43353 | AL3B1_HUMAN | Aldehyde dehydrogenase family 3 member B1                      | ALDH3B1  |
| Q9Y673 | ALG5_HUMAN  | Dolichyl-phosphate beta-glucosyltransferase                    | ALG5     |
| P09917 | LOX5_HUMAN  | Arachidonate 5-lipoxygenase                                    | ALOX5    |
| P20292 | AL5AP_HUMAN | Arachidonate 5-lipoxygenase-activating protein                 | ALOX5AP  |

|        |              |                                                                                 |         |
|--------|--------------|---------------------------------------------------------------------------------|---------|
| P05186 | PPBT_HUMAN   | Alkaline phosphatase                                                            | ALPL    |
| Q01432 | AMPD3_HUMAN  | AMP deaminase 3                                                                 | AMPD3   |
| P16157 | ANK1_HUMAN   | Ankyrin-1                                                                       | ANK1    |
| Q5VYY1 | ANR22_HUMAN  | Ankyrin repeat domain-containing protein 22                                     | ANKRD22 |
| Q9NW15 | ANO10_HUMAN  | Anoctamin-10                                                                    | ANO10   |
| Q4KMQ2 | ANO6_HUMAN   | Anoctamin-6                                                                     | ANO6    |
| P39687 | AN32A_HUMAN  | Acidic leucine-rich nuclear phosphoprotein 32 family member A                   | ANP32A  |
| Q92688 | AN32B_HUMAN  | Acidic leucine-rich nuclear phosphoprotein 32 family member B                   | ANP32B  |
| Q9BTT0 | AN32E_HUMAN  | Acidic leucine-rich nuclear phosphoprotein 32 family member E                   | ANP32E  |
| P15144 | AMPN_HUMAN   | Aminopeptidase N                                                                | ANPEP   |
| P58335 | ANTR2_HUMAN  | Anthrax toxin receptor 2                                                        | ANTXR2  |
| P50995 | ANX11_HUMAN  | Annexin A11                                                                     | ANXA11  |
| P12429 | ANXA3_HUMAN  | Annexin A3                                                                      | ANXA3   |
| P09525 | ANXA4_HUMAN  | Annexin A4                                                                      | ANXA4   |
| P08133 | ANXA6_HUMAN  | Annexin A6                                                                      | ANXA6   |
| P20073 | ANXA7_HUMAN  | Annexin A7                                                                      | ANXA7   |
| Q16853 | AOC3_HUMAN   | Membrane primary amine oxidase                                                  | AOC3    |
| O95782 | AP2A1_HUMAN  | AP-2 complex subunit alpha-1                                                    | AP2A1   |
| P63010 | AP2B1_HUMAN  | AP-2 complex subunit beta                                                       | AP2B1   |
| Q7Z5R6 | AB1IP_HUMAN  | Amyloid beta A4 precursor protein-binding family B member 1-interacting protein | APBB1IP |
| Q9HDC9 | APMAP_HUMAN  | Adipocyte plasma membrane-associated protein                                    | APMAP   |
| P07741 | APT_HUMAN    | Adenine phosphoribosyltransferase                                               | APRT    |
| P18085 | ARF4_HUMAN   | ADP-ribosylation factor 4                                                       | ARF4    |
| P62330 | ARF6_HUMAN   | ADP-ribosylation factor 6                                                       | ARF6    |
| Q07960 | RHG01_HUMAN  | Rho GTPase-activating protein 1                                                 | ARHGAP1 |
| Q9BRR9 | RHG09_HUMAN  | Rho GTPase-activating protein 9                                                 | ARHGAP9 |
| Q92974 | ARHG2_HUMAN  | Rho guanine nucleotide exchange factor 2                                        | ARHGEF2 |
| O75915 | PRAF3_HUMAN  | PRA1 family protein 3                                                           | ARL6IP5 |
| Q9NVJ2 | ARL8B_HUMAN  | ADP-ribosylation factor-like protein 8B                                         | ARL8B   |
| O15143 | ARPC1B_HUMAN | Actin-related protein 2/3 complex subunit 1B                                    | ARPC1B  |
| O15144 | ARPC2_HUMAN  | Actin-related protein 2/3 complex subunit 2                                     | ARPC2   |
| O15511 | ARPC5_HUMAN  | Actin-related protein 2/3 complex subunit 5                                     | ARPC5   |
| Q13510 | ASAH1_HUMAN  | Acid ceramidase                                                                 | ASAH1   |

|        |             |                                                                         |          |
|--------|-------------|-------------------------------------------------------------------------|----------|
| Q12797 | ASPH_HUMAN  | Aspartyl/asparaginyl beta-hydroxylase                                   | ASPH     |
| Q9BXN1 | ASPN_HUMAN  | Asporin                                                                 | ASPN     |
| P31939 | PUR9_HUMAN  | Bifunctional purine biosynthesis protein PURH                           | ATIC     |
| Q6DD88 | ATLA3_HUMAN | Atlastin-3                                                              | ATL3     |
| P98196 | AT11A_HUMAN | Probable phospholipid-transporting ATPase IH                            | ATP11A   |
| Q9Y2G3 | AT11B_HUMAN | Probable phospholipid-transporting ATPase IF                            | ATP11B   |
| P05023 | AT1A1_HUMAN | Sodium/potassium-transporting ATPase subunit alpha-1                    | ATP1A1   |
| P54709 | AT1B3_HUMAN | Sodium/potassium-transporting ATPase subunit beta-3                     | ATP1B3   |
| O14983 | AT2A1_HUMAN | Sarcoplasmic/endoplasmic reticulum calcium ATPase 1                     | ATP2A1   |
| P16615 | AT2A2_HUMAN | Sarcoplasmic/endoplasmic reticulum calcium ATPase 2                     | ATP2A2   |
| Q93084 | AT2A3_HUMAN | Sarcoplasmic/endoplasmic reticulum calcium ATPase 3                     | ATP2A3   |
| P23634 | AT2B4_HUMAN | Plasma membrane calcium-transporting ATPase 4                           | ATP2B4   |
| P56134 | ATPK_HUMAN  | ATP synthase subunit f                                                  | ATP5J2   |
| Q93050 | VPP1_HUMAN  | V-type proton ATPase 116 kDa subunit a isoform 1                        | ATP6V0A1 |
| P38606 | VATA_HUMAN  | V-type proton ATPase catalytic subunit A                                | ATP6V1A  |
| P21281 | VATB2_HUMAN | V-type proton ATPase subunit B                                          | ATP6V1B2 |
| O75348 | VATG1_HUMAN | V-type proton ATPase subunit G 1                                        | ATP6V1G1 |
| P20160 | CAP7_HUMAN  | Azurocidin                                                              | AZU1     |
| O75531 | BAF_HUMAN   | Barrier-to-autointegration factor                                       | BANF1    |
| P80723 | BASP1_HUMAN | Brain acid soluble protein 1                                            | BASP1    |
| P51572 | BAP31_HUMAN | B-cell receptor-associated protein 31                                   | BCAP31   |
| P21810 | PGS1_HUMAN  | Biglycan                                                                | BGN      |
| Q9UBW5 | BIN2_HUMAN  | Bridging integrator 2                                                   | BIN2     |
| P17213 | BPI_HUMAN   | Bactericidal permeability-increasing protein                            | BPI      |
| P35613 | BASI_HUMAN  | Basigin                                                                 | BSG      |
| Q10588 | BST1_HUMAN  | ADP-ribosyl cyclase/cyclic ADP-ribose hydrolase 2                       | BST1     |
| Q9H7M9 | VISTA_HUMAN | V-type immunoglobulin domain-containing suppressor of T-cell activation | VSIR     |
| Q9BQA9 | CQ062_HUMAN | Uncharacterized protein C17orf62                                        | C17orf62 |
| P21730 | C5AR1_HUMAN | C5a anaphylatoxin chemotactic receptor 1                                | C5AR1    |
| P22748 | CAH4_HUMAN  | Carbonic anhydrase 4                                                    | CA4      |
| P27708 | PYR1_HUMAN  | CAD protein [Includes: Glutamine-dependent carbamoyl-phosphate synthase | CAD      |
| P0DP23 | CALM1_HUMAN | Calmodulin-1                                                            | CALM1    |
| P0DP24 | CALM2_HUMAN | Calmodulin-2                                                            | CALM2    |

|        |             |                                                                   |         |
|--------|-------------|-------------------------------------------------------------------|---------|
| P0DP25 | CALM3_HUMAN | Calmodulin-3                                                      | CALM3   |
| P27797 | CALR_HUMAN  | Calreticulin                                                      | CALR    |
| Q13555 | KCC2G_HUMAN | Calcium/calmodulin-dependent protein kinase type II subunit gamma | CAMK2G  |
| P49913 | CAMP_HUMAN  | Cathelicidin antimicrobial peptide                                | CAMP    |
| Q86VP6 | CAND1_HUMAN | Cullin-associated NEDD8-dissociated protein 1                     | CAND1   |
| P27824 | CALX_HUMAN  | Calnexin                                                          | CANX    |
| Q01518 | CAP1_HUMAN  | Adenylyl cyclase-associated protein 1                             | CAP1    |
| P40121 | CAPG_HUMAN  | Macrophage-capping protein                                        | CAPG    |
| P07384 | CAN1_HUMAN  | Calpain-1 catalytic subunit                                       | CAPN1   |
| P17655 | CAN2_HUMAN  | Calpain-2 catalytic subunit                                       | CAPN2   |
| P52907 | CAZA1_HUMAN | F-actin-capping protein subunit alpha-1                           | CAPZA1  |
| P47756 | CAPZB_HUMAN | F-actin-capping protein subunit beta                              | CAPZB   |
| P31415 | CASQ1_HUMAN | Calsequestrin-1                                                   | CASQ1   |
| Q03135 | CAV1_HUMAN  | Caveolin-1                                                        | CAV1    |
| P51636 | CAV2_HUMAN  | Caveolin-2                                                        | CAV2    |
| Q8NDH2 | CC168_HUMAN | Coiled-coil domain-containing protein 168                         | CCDC168 |
| P78371 | TCPB_HUMAN  | T-complex protein 1 subunit beta                                  | CCT2    |
| P49368 | TCPG_HUMAN  | T-complex protein 1 subunit gamma                                 | CCT3    |
| P50991 | TCPD_HUMAN  | T-complex protein 1 subunit delta                                 | CCT4    |
| P48643 | TCPE_HUMAN  | T-complex protein 1 subunit epsilon                               | CCT5    |
| P40227 | TCPZ_HUMAN  | T-complex protein 1 subunit zeta                                  | CCT6A   |
| P50990 | TCPQ_HUMAN  | T-complex protein 1 subunit theta                                 | CCT8    |
| Q93033 | IGSF2_HUMAN | Immunoglobulin superfamily member 2                               | CD101   |
| Q8N6Q3 | CD177_HUMAN | CD177 antigen                                                     | CD177   |
| P16671 | CD36_HUMAN  | Platelet glycoprotein 4                                           | CD36    |
| P16070 | CD44_HUMAN  | CD44 antigen                                                      | CD44    |
| Q08722 | CD47_HUMAN  | Leukocyte surface antigen CD47                                    | CD47    |
| P09326 | CD48_HUMAN  | CD48 antigen                                                      | CD48    |
| P08174 | DAF_HUMAN   | Complement decay-accelerating factor                              | CD55    |
| P13987 | CD59_HUMAN  | CD59 glycoprotein                                                 | CD59    |
| P60033 | CD81_HUMAN  | CD81 antigen                                                      | CD81    |
| P27701 | CD82_HUMAN  | CD82 antigen                                                      | CD82    |
| P21926 | CD9_HUMAN   | CD9 antigen                                                       | CD9     |

|        |             |                                                           |          |
|--------|-------------|-----------------------------------------------------------|----------|
| Q9NPY3 | C1QR1_HUMAN | Complement component C1q receptor                         | CD93     |
| P48960 | CD97_HUMAN  | CD97 antigen                                              | CD97     |
| P32320 | CDD_HUMAN   | Cytidine deaminase                                        | CDA      |
| P60953 | CDC42_HUMAN | Cell division control protein 42 homolog                  | CDC42    |
| Q99459 | CDC5L_HUMAN | Cell division cycle 5-like protein                        | CDC5L    |
| P13688 | CEAM1_HUMAN | Carcinoembryonic antigen-related cell adhesion molecule 1 | CEACAM1  |
| P31997 | CEAM8_HUMAN | Carcinoembryonic antigen-related cell adhesion molecule 8 | CEACAM8  |
| P23141 | EST1_HUMAN  | Liver carboxylesterase 1                                  | CES1     |
| P11597 | CETP_HUMAN  | Cholesteryl ester transfer protein                        | CETP     |
| Q9BXR6 | FHR5_HUMAN  | Complement factor H-related protein 5                     | CFHR5    |
| Q13231 | CHIT1_HUMAN | Chitotriosidase-1                                         | CHIT1    |
| Q99653 | CHP1_HUMAN  | Calcineurin B homologous protein 1                        | CHP1     |
| Q99828 | CIB1_HUMAN  | Calcium and integrin-binding protein 1                    | CIB1     |
| Q07065 | CKAP4_HUMAN | Cytoskeleton-associated protein 4                         | CKAP4    |
| Q5QGZ9 | CL12A_HUMAN | C-type lectin domain family 12 member A                   | CLEC12A  |
| Q9NY25 | CLC5A_HUMAN | C-type lectin domain family 5 member A                    | CLEC5A   |
| P09496 | CLCA_HUMAN  | Clathrin light chain A                                    | CLTA     |
| Q96KP4 | CNDP2_HUMAN | Cytosolic non-specific dipeptidase                        | CNDP2    |
| Q99439 | CNN2_HUMAN  | Calponin-2                                                | CNN2     |
| P09543 | CN37_HUMAN  | 2',3'-cyclic-nucleotide 3'-phosphodiesterase              | CNP      |
| Q9BT09 | CNPY3_HUMAN | Protein canopy homolog 3                                  | CNPY3    |
| Q99715 | COCA1_HUMAN | Collagen alpha-1                                          | COL12A1  |
| Q05707 | COEA1_HUMAN | Collagen alpha-1                                          | COL14A1  |
| P12110 | CO6A2_HUMAN | Collagen alpha-2                                          | COL6A2   |
| Q9BWP8 | COL11_HUMAN | Collectin-11                                              | COLEC11  |
| Q8NBJS | GT251_HUMAN | Procollagen galactosyltransferase 1                       | COLGALT1 |
| P21964 | COMT_HUMAN  | Catechol O-methyltransferase                              | COMT     |
| P53621 | COPA_HUMAN  | Coatomer subunit alpha                                    | COPA     |
| P53618 | COPB_HUMAN  | Coatomer subunit beta                                     | COPB1    |
| P35606 | COPB2_HUMAN | Coatomer subunit beta'                                    | COPB2    |
| O14579 | COPE_HUMAN  | Coatomer subunit epsilon                                  | COPE     |
| P31146 | COR1A_HUMAN | Coronin-1A                                                | CORO1A   |
| P57737 | CORO7_HUMAN | Coronin-7                                                 | CORO7    |

|        |             |                                                                                                   |         |
|--------|-------------|---------------------------------------------------------------------------------------------------|---------|
| Q14019 | COTL1_HUMAN | Coactosin-like protein                                                                            | COTL1   |
| Q99829 | CPNE1_HUMAN | Copine-1                                                                                          | CPNE1   |
| Q96FN4 | CPNE2_HUMAN | Copine-2                                                                                          | CPNE2   |
| O75131 | CPNE3_HUMAN | Copine-3                                                                                          | CPNE3   |
| P17927 | CR1_HUMAN   | Complement receptor type 1                                                                        | CR1     |
| Q9NQ79 | CRAC1_HUMAN | Cartilage acidic protein 1                                                                        | CRTAC1  |
| P41240 | CSK_HUMAN   | Tyrosine-protein kinase CSK                                                                       | CSK     |
| P50461 | CSRP3_HUMAN | Cysteine and glycine-rich protein 3                                                               | CSRP3   |
| P08311 | CATG_HUMAN  | Cathepsin G                                                                                       | CTSG    |
| P25025 | CXCR2_HUMAN | C-X-C chemokine receptor type 2                                                                   | CXCR2   |
| P00167 | CYB5_HUMAN  | Cytochrome b5                                                                                     | CYB5A   |
| O43169 | CYB5B_HUMAN | Cytochrome b5 type B                                                                              | CYB5B   |
| P00387 | NB5R3_HUMAN | NADH-cytochrome b5 reductase 3                                                                    | CYB5R3  |
| P13498 | CY24A_HUMAN | Cytochrome b-245 light chain                                                                      | CYBA    |
| P04839 | CY24B_HUMAN | Cytochrome b-245 heavy chain                                                                      | CYBB    |
| Q7L576 | CYFP1_HUMAN | Cytoplasmic FMR1-interacting protein 1                                                            | CYFIP1  |
| Q96F07 | CYFP2_HUMAN | Cytoplasmic FMR1-interacting protein 2                                                            | CYFIP2  |
| Q08477 | CP4F3_HUMAN | Docosahexaenoic acid omega-hydroxylase CYP4F3                                                     | CYP4F3  |
| Q9H1C7 | CYTM1_HUMAN | Cysteine-rich and transmembrane domain-containing protein 1                                       | CYSTM1  |
| Q8NCG7 | DGLB_HUMAN  | Sn1-specific diacylglycerol lipase beta                                                           | DAGLB   |
| P07585 | PGS2_HUMAN  | Decorin                                                                                           | DCN     |
| P39656 | OST48_HUMAN | Dolichyl-diphosphooligosaccharide--protein glycosyltransferase 48 kDa subunit                     | DDOST   |
| P59666 | DEF3_HUMAN  | Neutrophil defensin 3                                                                             | DEFA3   |
| Q9Y315 | DEOC_HUMAN  | Deoxyribose-phosphate aldolase                                                                    | DERA    |
| P17661 | DESM_HUMAN  | Desmin                                                                                            | DES     |
| Q9UBM7 | DHCR7_HUMAN | 7-dehydrocholesterol reductase                                                                    | DHCR7   |
| Q9Y394 | DHRS7_HUMAN | Dehydrogenase/reductase SDR family member 7                                                       | DHRS7   |
| Q08211 | DHX9_HUMAN  | ATP-dependent RNA helicase A                                                                      | DHX9    |
| O60610 | DIAP1_HUMAN | Protein diaphanous homolog 1                                                                      | DIAPH1  |
| P36957 | ODO2_HUMAN  | Dihydrolipoyllysine-residue succinyltransferase component of 2-oxoglutarate dehydrogenase complex | DLST    |
| Q9UBS4 | DJB11_HUMAN | DnaJ homolog subfamily B member 11                                                                | DNAJB11 |
| O75165 | DJC13_HUMAN | DnaJ homolog subfamily C member 13                                                                | DNAJC13 |

|        |             |                                                                |         |
|--------|-------------|----------------------------------------------------------------|---------|
| P50570 | DYN2_HUMAN  | Dynamamin-2                                                    | DNM2    |
| Q92608 | DOCK2_HUMAN | Dedicator of cytokinesis protein 2                             | DOCK2   |
| Q8NF50 | DOCK8_HUMAN | Dedicator of cytokinesis protein 8                             | DOCK8   |
| Q16555 | DPYL2_HUMAN | Dihydropyrimidinase-related protein 2                          | DPYSL2  |
| P60981 | DEST_HUMAN  | Destrin                                                        | DSTN    |
| Q14204 | DYHC1_HUMAN | Cytoplasmic dynein 1 heavy chain 1                             | DYNC1H1 |
| O75923 | DYSF_HUMAN  | Dysferlin                                                      | DYSF    |
| Q05639 | EF1A2_HUMAN | Elongation factor 1-alpha 2                                    | EEF1A2  |
| P26641 | EF1G_HUMAN  | Elongation factor 1-gamma                                      | EEF1G   |
| Q96C19 | EFHD2_HUMAN | EF-hand domain-containing protein D2                           | EFHD2   |
| Q9H4M9 | EHD1_HUMAN  | EH domain-containing protein 1                                 | EHD1    |
| Q9NZN4 | EHD2_HUMAN  | EH domain-containing protein 2                                 | EHD2    |
| Q9H223 | EHD4_HUMAN  | EH domain-containing protein 4                                 | EHD4    |
| Q99613 | EIF3C_HUMAN | Eukaryotic translation initiation factor 3 subunit C           | EIF3C   |
| P08246 | ELNE_HUMAN  | Neutrophil elastase                                            | ELANE   |
| Q92556 | ELMO1_HUMAN | Engulfment and cell motility protein 1                         | ELMO1   |
| Q6PCB8 | EMB_HUMAN   | Embigin                                                        | EMB     |
| Q9UHX3 | AGRE2_HUMAN | Adhesion G protein-coupled receptor E2                         | ADGRE2  |
| Q9BY15 | AGRE3_HUMAN | Adhesion G protein-coupled receptor E3                         | ADGRE3  |
| Q9Y6X5 | ENPP4_HUMAN | Bis                                                            | ENPP4   |
| P11171 | 41_HUMAN    | Protein 4.1                                                    | EPB41   |
| P16452 | EPB42_HUMAN | Erythrocyte membrane protein band 4.2                          | EPB42   |
| P07099 | HYEP_HUMAN  | Epoxyde hydrolase 1                                            | EPHX1   |
| P11678 | PERE_HUMAN  | Eosinophil peroxidase                                          | EPX     |
| Q9NZ08 | ERAP1_HUMAN | Endoplasmic reticulum aminopeptidase 1                         | ERAP1   |
| Q96RT1 | ERBIN_HUMAN | Erbin                                                          | ERBIN   |
| Q969X5 | ERGI1_HUMAN | Endoplasmic reticulum-Golgi intermediate compartment protein 1 | ERGIC1  |
| O75477 | ERLN1_HUMAN | Erlin-1                                                        | ERLIN1  |
| O94905 | ERLN2_HUMAN | Erlin-2                                                        | ERLIN2  |
| Q96HE7 | ERO1A_HUMAN | ERO1-like protein alpha                                        | ERO1A   |
| P30040 | ERP29_HUMAN | Endoplasmic reticulum resident protein 29                      | ERP29   |
| Q9BS26 | ERP44_HUMAN | Endoplasmic reticulum resident protein 44                      | ERP44   |
| Q9BSJ8 | ESYT1_HUMAN | Extended synaptotagmin-1                                       | ESYT1   |

|        |             |                                                             |         |
|--------|-------------|-------------------------------------------------------------|---------|
| A0FGR8 | ESYT2_HUMAN | Extended synaptotagmin-2                                    | ESYT2   |
| P34910 | EVI2B_HUMAN | Protein EVI2B                                               | EVI2B   |
| Q9Y624 | JAM1_HUMAN  | Junctional adhesion molecule A                              | F11R    |
| Q9NUU6 | F105A_HUMAN | Inactive ubiquitin thioesterase FAM105A                     | FAM105A |
| Q9BRX8 | F213A_HUMAN | Redox-regulatory protein FAM213A                            | FAM213A |
| Q9NUQ9 | FA49B_HUMAN | Protein FAM49B                                              | FAM49B  |
| P35555 | FBN1_HUMAN  | Fibrillin-1 [Cleaved into: Asprosin]                        | FBN1    |
| P24071 | FCAR_HUMAN  | Immunoglobulin alpha Fc receptor                            | FCAR    |
| P30273 | FCERG_HUMAN | High affinity immunoglobulin epsilon receptor subunit gamma | FCER1G  |
| Q9Y6R7 | FCGBP_HUMAN | IgGFc-binding protein                                       | FCGBP   |
| P12318 | FCG2A_HUMAN | Low affinity immunoglobulin gamma Fc region receptor II-a   | FCGR2A  |
| O75015 | FCG3B_HUMAN | Low affinity immunoglobulin gamma Fc region receptor III-B  | FCGR3B  |
| P55899 | FCGRN_HUMAN | IgG receptor FcRn large subunit p51                         | FCGRT   |
| O00602 | FCN1_HUMAN  | Ficolin-1                                                   | FCN1    |
| Q96AC1 | FERM2_HUMAN | Fermitin family homolog 2                                   | FERMT2  |
| Q86UX7 | URP2_HUMAN  | Fermitin family homolog 3                                   | FERMT3  |
| P09769 | FGR_HUMAN   | Tyrosine-protein kinase Fgr                                 | FGR     |
| P26885 | FKBP2_HUMAN | Peptidyl-prolyl cis-trans isomerase FKBP2                   | FKBP2   |
| O75955 | FLOT1_HUMAN | Flotillin-1                                                 | FLOT1   |
| Q14254 | FLOT2_HUMAN | Flotillin-2                                                 | FLOT2   |
| O95466 | FMNL1_HUMAN | Formin-like protein 1                                       | FMNL1   |
| P11413 | G6PD_HUMAN  | Glucose-6-phosphate 1-dehydrogenase                         | G6PD    |
| Q14697 | GANAB_HUMAN | Neutral alpha-glucosidase AB                                | GANAB   |
| P28676 | GRAN_HUMAN  | Grancalcin                                                  | GCA     |
| P36269 | GGT5_HUMAN  | Glutathione hydrolase 5 proenzyme                           | GGT5    |
| Q92896 | GSLG1_HUMAN | Golgi apparatus protein 1                                   | GLG1    |
| Q9H4G4 | GAPR1_HUMAN | Golgi-associated plant pathogenesis-related protein 1       | GLIPR2  |
| P35754 | GLRX1_HUMAN | Glutaredoxin-1                                              | GLRX    |
| O60234 | GMFG_HUMAN  | Glia maturation factor gamma                                | GMFG    |
| Q14344 | GNA13_HUMAN | Guanine nucleotide-binding protein subunit alpha-13         | GNA13   |
| P04899 | GNAI2_HUMAN | Guanine nucleotide-binding protein G                        | GNAI2   |
| P08754 | GNAI3_HUMAN | Guanine nucleotide-binding protein G                        | GNAI3   |
| P50148 | GNAQ_HUMAN  | Guanine nucleotide-binding protein G                        | GNAQ    |



|        |             |                                                                              |           |
|--------|-------------|------------------------------------------------------------------------------|-----------|
| P63092 | GNAS2_HUMAN | Guanine nucleotide-binding protein G                                         | GNAS      |
| P62873 | GBB1_HUMAN  | Guanine nucleotide-binding protein G                                         | GNB1      |
| P62879 | GBB2_HUMAN  | Guanine nucleotide-binding protein G                                         | GNB2      |
| Q9HAV0 | GBB4_HUMAN  | Guanine nucleotide-binding protein subunit beta-4                            | GNB4      |
| P63218 | GBG5_HUMAN  | Guanine nucleotide-binding protein G                                         | GNG5      |
| P13224 | GP1BB_HUMAN | Platelet glycoprotein Ib beta chain                                          | GP1BB     |
| Q86Y34 | AGRG3_HUMAN | Adhesion G protein-coupled receptor G3                                       | ADGRG3    |
| Q9Y4H4 | GPSM3_HUMAN | G-protein-signaling modulator 3                                              | GPSM3     |
| P07203 | GPX1_HUMAN  | Glutathione peroxidase 1                                                     | GPX1      |
| P62993 | GRB2_HUMAN  | Growth factor receptor-bound protein 2                                       | GRB2      |
| P43250 | GRK6_HUMAN  | G protein-coupled receptor kinase 6                                          | GRK6      |
| Q9Y2Q3 | GSTK1_HUMAN | Glutathione S-transferase kappa 1                                            | GSTK1     |
| P28161 | GSTM2_HUMAN | Glutathione S-transferase Mu 2                                               | GSTM2     |
| P08236 | BGLR_HUMAN  | Beta-glucuronidase                                                           | GUSB      |
| P46976 | GLYG_HUMAN  | Glycogenin-1                                                                 | GYG1      |
| P02724 | GLPA_HUMAN  | Glycophorin-A                                                                | GYPA      |
| P13807 | GYS1_HUMAN  | Glycogen [starch] synthase                                                   | GYS1      |
| Q71U19 | H2AV_HUMAN  | Histone H2A.V                                                                | H2AFV     |
| O75367 | H2AY_HUMAN  | Core histone macro-H2A.1                                                     | H2AFY     |
| O95479 | G6PE_HUMAN  | GDH/6PGL endoplasmic bifunctional protein [Includes: Glucose 1-dehydrogenase | H6PD      |
| Q16836 | HCDH_HUMAN  | Hydroxyacyl-coenzyme A dehydrogenase                                         | HADH      |
| P40939 | ECHA_HUMAN  | Trifunctional enzyme subunit alpha                                           | HADHA     |
| P08631 | HCK_HUMAN   | Tyrosine-protein kinase HCK                                                  | HCK       |
| Q99878 | H2A1J_HUMAN | Histone H2A type 1-J                                                         | HIST1H2AJ |
| Q71D13 | H32_HUMAN   | Histone H3.2                                                                 | HIST2H3A; |
| P52790 | HXK3_HUMAN  | Hexokinase-3                                                                 | HK3       |
| P01892 | 1A02_HUMAN  | HLA class I histocompatibility antigen                                       | HLA-A     |
| P04439 | 1A03_HUMAN  | HLA class I histocompatibility antigen                                       | HLA-A     |
| P05534 | 1A24_HUMAN  | HLA class I histocompatibility antigen                                       | HLA-A     |
| P18463 | 1B37_HUMAN  | HLA class I histocompatibility antigen                                       | HLA-B     |
| P30508 | 1C12_HUMAN  | HLA class I histocompatibility antigen                                       | HLA-C     |
| P01903 | DRA_HUMAN   | HLA class II histocompatibility antigen                                      | HLA-DRA   |
| Q5Y7A7 | 2B1D_HUMAN  | HLA class II histocompatibility antigen                                      | HLA-DRB1  |

|        |             |                                                                                     |          |
|--------|-------------|-------------------------------------------------------------------------------------|----------|
| P79483 | DRB3_HUMAN  | HLA class II histocompatibility antigen                                             | HLA-DRB3 |
| Q8TCT9 | HM13_HUMAN  | Minor histocompatibility antigen H13                                                | HM13     |
| P09429 | HMGB1_HUMAN | High mobility group protein B1                                                      | HMGB1    |
| P26583 | HMGB2_HUMAN | High mobility group protein B2                                                      | HMGB2    |
| Q92619 | HMHA1_HUMAN | Rho GTPase-activating protein 45 [Cleaved into: Minor histocompatibility antigen HA | ARHGAP45 |
| Q14103 | HNRPD_HUMAN | Heterogeneous nuclear ribonucleoprotein D0                                          | HNRNPD   |
| P31943 | HNRH1_HUMAN | Heterogeneous nuclear ribonucleoprotein H                                           | HNRNPH1  |
| P61978 | HNRPK_HUMAN | Heterogeneous nuclear ribonucleoprotein K                                           | HNRNPK   |
| Q00839 | HNRPU_HUMAN | Heterogeneous nuclear ribonucleoprotein U                                           | HNRNPU   |
| Q8NBQ5 | DHB11_HUMAN | Estradiol 17-beta-dehydrogenase 11                                                  | HSD17B11 |
| Q53GQ0 | DHB12_HUMAN | Very-long-chain 3-oxoacyl-CoA reductase                                             | HSD17B12 |
| P51659 | DHB4_HUMAN  | Peroxisomal multifunctional enzyme type 2                                           | HSD17B4  |
| P08238 | HS90B_HUMAN | Heat shock protein HSP 90-beta                                                      | HSP90AB1 |
| P14625 | ENPL_HUMAN  | Endoplasmic                                                                         | HSP90B1  |
| P0DMV8 | HS71A_HUMAN | Heat shock 70 kDa protein 1A                                                        | HSPA1A   |
| P0DMV9 | HS71B_HUMAN | Heat shock 70 kDa protein 1B                                                        | HSPA1B   |
| O14558 | HSPB6_HUMAN | Heat shock protein beta-6                                                           | HSPB6    |
| P10809 | CH60_HUMAN  | 60 kDa heat shock protein                                                           | HSPD1    |
| Q92743 | HTRA1_HUMAN | Serine protease HTRA1                                                               | HTRA1    |
| Q96D96 | HVCN1_HUMAN | Voltage-gated hydrogen channel 1                                                    | HVCN1    |
| Q9Y4L1 | HYOU1_HUMAN | Hypoxia up-regulated protein 1                                                      | HYOU1    |
| P05362 | ICAM1_HUMAN | Intercellular adhesion molecule 1                                                   | ICAM1    |
| P32942 | ICAM3_HUMAN | Intercellular adhesion molecule 3                                                   | ICAM3    |
| P48735 | IDHP_HUMAN  | Isocitrate dehydrogenase [NADP]                                                     | IDH2     |
| Q01628 | IFM3_HUMAN  | Interferon-induced transmembrane protein 3                                          | IFITM3   |
| P11717 | MPRI_HUMAN  | Cation-independent mannose-6-phosphate receptor                                     | IGF2R    |
| P0DOY2 | IGLC2_HUMAN | Immunoglobulin lambda constant 2                                                    | IGLC2    |
| P0DOY3 | IGLC3_HUMAN | Immunoglobulin lambda constant 3                                                    | IGLC3    |
| B9A064 | IGLL5_HUMAN | Immunoglobulin lambda-like polypeptide 5                                            | IGLL5    |
| Q13418 | ILK_HUMAN   | Integrin-linked protein kinase                                                      | ILK      |
| P46940 | IQGA1_HUMAN | Ras GTPase-activating-like protein IQGAP1                                           | IQGAP1   |
| P08514 | ITA2B_HUMAN | Integrin alpha-IIb                                                                  | ITGA2B   |
| P08648 | ITA5_HUMAN  | Integrin alpha-5                                                                    | ITGA5    |

|        |             |                                                             |         |
|--------|-------------|-------------------------------------------------------------|---------|
| P23229 | ITA6_HUMAN  | Integrin alpha-6                                            | ITGA6   |
| P20701 | ITAL_HUMAN  | Integrin alpha-L                                            | ITGAL   |
| P11215 | ITAM_HUMAN  | Integrin alpha-M                                            | ITGAM   |
| P20702 | ITAX_HUMAN  | Integrin alpha-X                                            | ITGAX   |
| P05556 | ITB1_HUMAN  | Integrin beta-1                                             | ITGB1   |
| P05107 | ITB2_HUMAN  | Integrin beta-2                                             | ITGB2   |
| P05106 | ITB3_HUMAN  | Integrin beta-3                                             | ITGB3   |
| Q14571 | ITPR2_HUMAN | Inositol 1                                                  | ITPR2   |
| Q8IWB1 | IPRI_HUMAN  | Inositol 1                                                  | ITPRIP  |
| Q13303 | KCAB2_HUMAN | Voltage-gated potassium channel subunit beta-2              | KCNAB2  |
| Q14974 | IMB1_HUMAN  | Importin subunit beta-1                                     | KPNB1   |
| P01116 | RASK_HUMAN  | GTPase KRas                                                 | KRAS    |
| Q7Z794 | K2C1B_HUMAN | Keratin                                                     | KRT77   |
| P11279 | LAMP1_HUMAN | Lysosome-associated membrane glycoprotein 1                 | LAMP1   |
| P13473 | LAMP2_HUMAN | Lysosome-associated membrane glycoprotein 2                 | LAMP2   |
| Q9UHA4 | LTOR3_HUMAN | Ragulator complex protein LAMTOR3                           | LAMTOR3 |
| Q14739 | LBR_HUMAN   | Lamin-B receptor                                            | LBR     |
| P80188 | NGAL_HUMAN  | Neutrophil gelatinase-associated lipocalin                  | LCN2    |
| P17931 | LEG3_HUMAN  | Galectin-3                                                  | LGALS3  |
| Q6PI73 | LIRA6_HUMAN | Leukocyte immunoglobulin-like receptor subfamily A member 6 | LILRA6  |
| Q8N423 | LIRB2_HUMAN | Leukocyte immunoglobulin-like receptor subfamily B member 2 | LILRB2  |
| O75022 | LIRB3_HUMAN | Leukocyte immunoglobulin-like receptor subfamily B member 3 | LILRB3  |
| Q05469 | LIPS_HUMAN  | Hormone-sensitive lipase                                    | LIPE    |
| P49257 | LMAN1_HUMAN | Protein ERGIC-53                                            | LMAN1   |
| Q12907 | LMAN2_HUMAN | Vesicular integral-membrane protein VIP36                   | LMAN2   |
| P02545 | LMNA_HUMAN  | Prelamin-A/C [Cleaved into: Lamin-A/C                       | LMNA    |
| Q9C0E8 | LNP_HUMAN   | Endoplasmic reticulum junction formation protein lunapark   | LNPK    |
| Q9UIQ6 | LCAP_HUMAN  | Leucyl-cystinyl aminopeptidase                              | LNPEP   |
| Q7L5N7 | PCAT2_HUMAN | Lysophosphatidylcholine acyltransferase 2                   | LPCAT2  |
| Q92604 | LGAT1_HUMAN | Acyl-CoA:lysophosphatidylglycerol acyltransferase 1         | LPGAT1  |
| Q8N386 | LRC25_HUMAN | Leucine-rich repeat-containing protein 25                   | LRRC25  |
| P33241 | LSP1_HUMAN  | Lymphocyte-specific protein 1                               | LSP1    |
| P09960 | LKHA4_HUMAN | Leukotriene A-4 hydrolase                                   | LTA4H   |

|        |             |                                                            |         |
|--------|-------------|------------------------------------------------------------|---------|
| Q15722 | LT4R1_HUMAN | Leukotriene B4 receptor 1                                  | LTB4R   |
| O60449 | LY75_HUMAN  | Lymphocyte antigen 75                                      | LY75    |
| P07948 | LYN_HUMAN   | Tyrosine-protein kinase Lyn                                | LYN     |
| P20645 | MPRD_HUMAN  | Cation-dependent mannose-6-phosphate receptor              | M6PR    |
| P33908 | MA1A1_HUMAN | Mannosyl-oligosaccharide 1                                 | MAN1A1  |
| P21397 | AOFA_HUMAN  | Amine oxidase [flavin-containing] A                        | MAOA    |
| P28482 | MK01_HUMAN  | Mitogen-activated protein kinase 1                         | MAPK1   |
| Q16539 | MK14_HUMAN  | Mitogen-activated protein kinase 14                        | MAPK14  |
| P29966 | MARCS_HUMAN | Myristoylated alanine-rich C-kinase substrate              | MARCKS  |
| P48740 | MASP1_HUMAN | Mannan-binding lectin serine protease 1                    | MASP1   |
| Q6ZWT7 | MBOA2_HUMAN | Lysophospholipid acyltransferase 2                         | MBOAT2  |
| Q96N66 | MBOA7_HUMAN | Lysophospholipid acyltransferase 7                         | MBOAT7  |
| Q8IX19 | MCEM1_HUMAN | Mast cell-expressed membrane protein 1                     | MCEMP1  |
| Q8NI22 | MCFD2_HUMAN | Multiple coagulation factor deficiency protein 2           | MCFD2   |
| Q9H8H3 | MET7A_HUMAN | Methyltransferase-like protein 7A                          | METTL7A |
| P55083 | MFAP4_HUMAN | Microfibril-associated glycoprotein 4                      | MFAP4   |
| Q08431 | MFGM_HUMAN  | Lactadherin                                                | MFGE8   |
| Q14728 | MFS10_HUMAN | Major facilitator superfamily domain-containing protein 10 | MFSD10  |
| O43451 | MGA_HUMAN   | Maltase-glucoamylase                                       | MGAM    |
| Q99685 | MGLL_HUMAN  | Monoglyceride lipase                                       | MGLL    |
| P10620 | MGST1_HUMAN | Microsomal glutathione S-transferase 1                     | MGST1   |
| Q14165 | MLEC_HUMAN  | Malectin                                                   | MLEC    |
| P08473 | NEP_HUMAN   | Nepilysin                                                  | MME     |
| Q9NPA2 | MMP25_HUMAN | Matrix metalloproteinase-25                                | MMP25   |
| P22894 | MMP8_HUMAN  | Neutrophil collagenase                                     | MMP8    |
| P41218 | MNDA_HUMAN  | Myeloid cell nuclear differentiation antigen               | MNDA    |
| Q13724 | MOGS_HUMAN  | Mannosyl-oligosaccharide glucosidase                       | MOGS    |
| Q8NHP6 | MSPD2_HUMAN | Motile sperm domain-containing protein 2                   | MOSPD2  |
| P05164 | PERM_HUMAN  | Myeloperoxidase                                            | MPO     |
| Q00013 | EM55_HUMAN  | 55 kDa erythrocyte membrane protein                        | MPP1    |
| P11586 | C1TC_HUMAN  | C-1-tetrahydrofolate synthase                              | MTHFD1  |
| Q14764 | MVP_HUMAN   | Major vault protein                                        | MVP     |
| Q96S97 | MYADM_HUMAN | Myeloid-associated differentiation marker                  | MYADM   |

|        |             |                                                                               |         |
|--------|-------------|-------------------------------------------------------------------------------|---------|
| Q00872 | MYPC1_HUMAN | Myosin-binding protein C                                                      | MYBPC1  |
| Q14324 | MYPC2_HUMAN | Myosin-binding protein C                                                      | MYBPC2  |
| P12882 | MYH1_HUMAN  | Myosin-1                                                                      | MYH1    |
| P35749 | MYH11_HUMAN | Myosin-11                                                                     | MYH11   |
| Q9Y623 | MYH4_HUMAN  | Myosin-4                                                                      | MYH4    |
| P12883 | MYH7_HUMAN  | Myosin-7                                                                      | MYH7    |
| P05976 | MYL1_HUMAN  | Myosin light chain 1/3                                                        | MYL1    |
| P19105 | ML12A_HUMAN | Myosin regulatory light chain 12A                                             | MYL12A  |
| P08590 | MYL3_HUMAN  | Myosin light chain 3                                                          | MYL3    |
| P60660 | MYL6_HUMAN  | Myosin light polypeptide 6                                                    | MYL6    |
| Q96A32 | MLRS_HUMAN  | Myosin regulatory light chain 2                                               | MYLPF   |
| O00159 | MYO1C_HUMAN | Unconventional myosin-Ic                                                      | MYO1C   |
| O00160 | MYO1F_HUMAN | Unconventional myosin-I f                                                     | MYO1F   |
| B011T2 | MYO1G_HUMAN | Unconventional myosin-Ig [Cleaved into: Minor histocompatibility antigen HA-2 | MYO1G   |
| Q9NZM1 | MYOF_HUMAN  | Myoferlin                                                                     | MYOF    |
| P54296 | MYOM2_HUMAN | Myomesin-2                                                                    | MYOM2   |
| Q13765 | NACA_HUMAN  | Nascent polypeptide-associated complex subunit alpha                          | NACA    |
| P43490 | NAMPT_HUMAN | Nicotinamide phosphoribosyltransferase                                        | NAMPT   |
| Q99733 | NP1L4_HUMAN | Nucleosome assembly protein 1-like 4                                          | NAP1L4  |
| P54920 | SNAA_HUMAN  | Alpha-soluble NSF attachment protein                                          | NAPA    |
| P14598 | NCF1_HUMAN  | Neutrophil cytosol factor 1                                                   | NCF1    |
| P19878 | NCF2_HUMAN  | Neutrophil cytosol factor 2                                                   | NCF2    |
| Q15080 | NCF4_HUMAN  | Neutrophil cytosol factor 4                                                   | NCF4    |
| P55160 | NCKPL_HUMAN | Nck-associated protein 1-like                                                 | NCKAP1L |
| P19338 | NUCL_HUMAN  | Nucleolin                                                                     | NCL     |
| P20929 | NEBU_HUMAN  | Nebulin                                                                       | NEB     |
| Q92982 | NINJ1_HUMAN | Ninjurin-1                                                                    | NINJ1   |
| Q15155 | NOMO1_HUMAN | Nodal modulator 1                                                             | NOMO1   |
| P06748 | NPM_HUMAN   | Nucleophosmin                                                                 | NPM1    |
| Q9Y639 | NPTN_HUMAN  | Neuroplastin                                                                  | NPTN    |
| P01111 | RASN_HUMAN  | GTPase NRas                                                                   | NRAS    |
| P21589 | 5NTD_HUMAN  | 5'-nucleotidase                                                               | NT5E    |
| Q02818 | NUCB1_HUMAN | Nucleobindin-1                                                                | NUCB1   |

|        |             |                                                       |         |
|--------|-------------|-------------------------------------------------------|---------|
| P80303 | NUCB2_HUMAN | Nucleobindin-2                                        | NUCB2   |
| Q6UX06 | OLFM4_HUMAN | Olfactomedin-4                                        | OLFM4   |
| P78380 | OLR1_HUMAN  | Oxidized low-density lipoprotein receptor 1           | OLR1    |
| Q9BZF1 | OSBL8_HUMAN | Oxysterol-binding protein-related protein 8           | OSBPL8  |
| Q92882 | OSTF1_HUMAN | Osteoclast-stimulating factor 1                       | OSTF1   |
| O95747 | OXR1_HUMAN  | Serine/threonine-protein kinase OSR1                  | OXR1    |
| Q9UM07 | PADI4_HUMAN | Protein-arginine deiminase type-4                     | PADI4   |
| Q13177 | PAK2_HUMAN  | Serine/threonine-protein kinase PAK 2                 | PAK2    |
| Q9UUK3 | PARP4_HUMAN | Poly [ADP-ribose] polymerase 4                        | PARP4   |
| Q9HBI0 | PARVG_HUMAN | Gamma-parvin                                          | PARVG   |
| Q15365 | PCBP1_HUMAN | Poly                                                  | PCBP1   |
| Q15366 | PCBP2_HUMAN | Poly                                                  | PCBP2   |
| Q9UHG3 | PCYOX_HUMAN | Prenylcysteine oxidase 1                              | PCYOX1  |
| O75340 | PDCD6_HUMAN | Programmed cell death protein 6                       | PDCD6   |
| Q8WUM4 | PDC6I_HUMAN | Programmed cell death 6-interacting protein           | PDC6IP  |
| P30101 | PDIA3_HUMAN | Protein disulfide-isomerase A3                        | PDIA3   |
| P13667 | PDIA4_HUMAN | Protein disulfide-isomerase A4                        | PDIA4   |
| Q14554 | PDIA5_HUMAN | Protein disulfide-isomerase A5                        | PDIA5   |
| Q15084 | PDIA6_HUMAN | Protein disulfide-isomerase A6                        | PDIA6   |
| P16284 | PECA1_HUMAN | Platelet endothelial cell adhesion molecule           | PECAM1  |
| Q9UBV8 | PEF1_HUMAN  | Peflin                                                | PEF1    |
| P17858 | PFKAL_HUMAN | ATP-dependent 6-phosphofructokinase                   | PFKL    |
| P08237 | PFKAM_HUMAN | ATP-dependent 6-phosphofructokinase                   | PFKM    |
| P52209 | 6PGD_HUMAN  | 6-phosphogluconate dehydrogenase                      | PGD     |
| O75594 | PGRP1_HUMAN | Peptidoglycan recognition protein 1                   | PGLYRP1 |
| Q96G03 | PGM2_HUMAN  | Phosphoglucomutase-2                                  | PGM2    |
| O00264 | PGRC1_HUMAN | Membrane-associated progesterone receptor component 1 | PGRMC1  |
| O43175 | SERA_HUMAN  | D-3-phosphoglycerate dehydrogenase                    | PHGDH   |
| P46019 | KPB2_HUMAN  | Phosphorylase b kinase regulatory subunit alpha       | PHKA2   |
| P00749 | UROK_HUMAN  | Urokinase-type plasminogen activator                  | PLAU    |
| Q03405 | UPAR_HUMAN  | Urokinase plasminogen activator surface receptor      | PLAUR   |
| Q6P4A8 | PLBL1_HUMAN | Phospholipase B-like 1                                | PLBD1   |
| P08567 | PLEK_HUMAN  | Pleckstrin                                            | PLEK    |

|        |             |                                                                                   |         |
|--------|-------------|-----------------------------------------------------------------------------------|---------|
| Q8TD55 | PKHO2_HUMAN | Pleckstrin homology domain-containing family O member 2                           | PLEKHO2 |
| O60240 | PLIN1_HUMAN | Perilipin-1                                                                       | PLIN1   |
| Q96Q06 | PLIN4_HUMAN | Perilipin-4                                                                       | PLIN4   |
| Q04941 | PLP2_HUMAN  | Proteolipid protein 2                                                             | PLP2    |
| O15162 | PLS1_HUMAN  | Phospholipid scramblase 1                                                         | PLSCR1  |
| O15031 | PLXB2_HUMAN | Plexin-B2                                                                         | PLXNB2  |
| O60486 | PLXC1_HUMAN | Plexin-C1                                                                         | PLXNC1  |
| P16435 | NCPR_HUMAN  | NADPH--cytochrome P450 reductase                                                  | POR     |
| P62136 | PP1A_HUMAN  | Serine/threonine-protein phosphatase PP1-alpha catalytic subunit                  | PPP1CA  |
| P67775 | PP2AA_HUMAN | Serine/threonine-protein phosphatase 2A catalytic subunit alpha isoform           | PPP2CA  |
| P30153 | 2AAA_HUMAN  | Serine/threonine-protein phosphatase 2A 65 kDa regulatory subunit A alpha isoform | PPP2R1A |
| P30044 | PRDX5_HUMAN | Peroxiredoxin-5                                                                   | PRDX5   |
| P51888 | PRELP_HUMAN | Prolargin                                                                         | PRELP   |
| P10644 | KAP0_HUMAN  | cAMP-dependent protein kinase type I-alpha regulatory subunit                     | PRKAR1A |
| P31323 | KAP3_HUMAN  | cAMP-dependent protein kinase type II-beta regulatory subunit                     | PRKAR2B |
| P05771 | KPCB_HUMAN  | Protein kinase C beta type                                                        | PRKCB   |
| Q05655 | KPCD_HUMAN  | Protein kinase C delta type                                                       | PRKCD   |
| Q969G5 | CAVN3_HUMAN | Caveolae-associated protein 3                                                     | CAVIN3  |
| P14314 | GLU2B_HUMAN | Glucosidase 2 subunit beta                                                        | PRKCSH  |
| P78527 | PRKDC_HUMAN | DNA-dependent protein kinase catalytic subunit                                    | PRKDC   |
| P22891 | PROZ_HUMAN  | Vitamin K-dependent protein Z                                                     | PROZ    |
| Q6P2Q9 | PRP8_HUMAN  | Pre-mRNA-processing-splicing factor 8                                             | PRPF8   |
| P60891 | PRPS1_HUMAN | Ribose-phosphate pyrophosphokinase 1                                              | PRPS1   |
| Q96M27 | PRRC1_HUMAN | Protein PRRC1                                                                     | PRRC1   |
| P24158 | PRTN3_HUMAN | Myeloblastin                                                                      | PRTN3   |
| P07602 | SAP_HUMAN   | Prosaposin                                                                        | PSAP    |
| P25786 | PSA1_HUMAN  | Proteasome subunit alpha type-1                                                   | PSMA1   |
| P28065 | PSB9_HUMAN  | Proteasome subunit beta type-9                                                    | PSMB9   |
| P35998 | PRS7_HUMAN  | 26S proteasome regulatory subunit 7                                               | PSMC2   |
| P43686 | PRS6B_HUMAN | 26S proteasome regulatory subunit 6B                                              | PSMC4   |
| P62195 | PRS8_HUMAN  | 26S proteasome regulatory subunit 8                                               | PSMC5   |
| P62333 | PRS10_HUMAN | 26S proteasome regulatory subunit 10B                                             | PSMC6   |
| Q99460 | PSMD1_HUMAN | 26S proteasome non-ATPase regulatory subunit 1                                    | PSMD1   |

|        |             |                                                  |        |
|--------|-------------|--------------------------------------------------|--------|
| O00231 | PSD11_HUMAN | 26S proteasome non-ATPase regulatory subunit 11  | PSMD11 |
| O00232 | PSD12_HUMAN | 26S proteasome non-ATPase regulatory subunit 12  | PSMD12 |
| Q13200 | PSMD2_HUMAN | 26S proteasome non-ATPase regulatory subunit 2   | PSMD2  |
| Q06323 | PSME1_HUMAN | Proteasome activator complex subunit 1           | PSME1  |
| P26599 | PTBP1_HUMAN | Polypyrimidine tract-binding protein 1           | PTBP1  |
| Q15185 | TEBP_HUMAN  | Prostaglandin E synthase 3                       | PTGES3 |
| Q16647 | PTGIS_HUMAN | Prostacyclin synthase                            | PTGIS  |
| Q14289 | FAK2_HUMAN  | Protein-tyrosine kinase 2-beta                   | PTK2B  |
| P29350 | PTN6_HUMAN  | Tyrosine-protein phosphatase non-receptor type 6 | PTPN6  |
| P08575 | PTPRC_HUMAN | Receptor-type tyrosine-protein phosphatase C     | PTPRC  |
| Q12913 | PTPRJ_HUMAN | Receptor-type tyrosine-protein phosphatase eta   | PTPRJ  |
| Q6NZ12 | CAVN1_HUMAN | Caveolae-associated protein 1                    | CAVIN1 |
| P49023 | PAXI_HUMAN  | Paxillin                                         | PXN    |
| P11217 | PYGM_HUMAN  | Glycogen phosphorylase                           | PYGM   |
| Q16769 | QPCT_HUMAN  | Glutaminy-peptide cyclotransferase               | QPCT   |
| P61026 | RAB10_HUMAN | Ras-related protein Rab-10                       | RAB10  |
| Q15907 | RB11B_HUMAN | Ras-related protein Rab-11B                      | RAB11B |
| P61106 | RAB14_HUMAN | Ras-related protein Rab-14                       | RAB14  |
| Q9H0U4 | RAB1B_HUMAN | Ras-related protein Rab-1B                       | RAB1B  |
| P51159 | RB27A_HUMAN | Ras-related protein Rab-27A                      | RAB27A |
| P61019 | RAB2A_HUMAN | Ras-related protein Rab-2A                       | RAB2A  |
| Q13636 | RAB31_HUMAN | Ras-related protein Rab-31                       | RAB31  |
| Q15286 | RAB35_HUMAN | Ras-related protein Rab-35                       | RAB35  |
| P51148 | RAB5C_HUMAN | Ras-related protein Rab-5C                       | RAB5C  |
| P20340 | RAB6A_HUMAN | Ras-related protein Rab-6A                       | RAB6A  |
| P51149 | RAB7A_HUMAN | Ras-related protein Rab-7a                       | RAB7A  |
| P61006 | RAB8A_HUMAN | Ras-related protein Rab-8A                       | RAB8A  |
| Q92930 | RAB8B_HUMAN | Ras-related protein Rab-8B                       | RAB8B  |
| P63000 | RAC1_HUMAN  | Ras-related C3 botulinum toxin substrate 1       | RAC1   |
| P15153 | RAC2_HUMAN  | Ras-related C3 botulinum toxin substrate 2       | RAC2   |
| P11234 | RALB_HUMAN  | Ras-related protein Ral-B                        | RALB   |
| P62826 | RAN_HUMAN   | GTP-binding nuclear protein Ran                  | RAN    |
| P62834 | RAP1A_HUMAN | Ras-related protein Rap-1A                       | RAP1A  |



|        |              |                                                                          |         |
|--------|--------------|--------------------------------------------------------------------------|---------|
| P61224 | RAP1B_HUMAN  | Ras-related protein Rap-1b                                               | RAP1B   |
| P61225 | RAP2B_HUMAN  | Ras-related protein Rap-2b                                               | RAP2B   |
| Q00765 | REEP5_HUMAN  | Receptor expression-enhancing protein 5                                  | REEP5   |
| O15258 | RER1_HUMAN   | Protein RER1                                                             | RER1    |
| P49795 | RGS19_HUMAN  | Regulator of G-protein signaling 19                                      | RGS19   |
| P18577 | RHCE_HUMAN   | Blood group Rh                                                           | RHCE    |
| P84095 | RHOG_HUMAN   | Rho-related GTP-binding protein RhoG                                     | RHOG    |
| P12724 | ECP_HUMAN    | Eosinophil cationic protein                                              | RNASE3  |
| Q9H4A4 | AMPB_HUMAN   | Aminopeptidase B                                                         | RNPEP   |
| O75695 | XRP2_HUMAN   | Protein XRP2                                                             | RP2     |
| P62913 | RL11_HUMAN   | 60S ribosomal protein L11                                                | RPL11   |
| P04843 | RPN1_HUMAN   | Dolichyl-diphosphooligosaccharide--protein glycosyltransferase subunit 1 | RPN1    |
| P04844 | RPN2_HUMAN   | Dolichyl-diphosphooligosaccharide--protein glycosyltransferase subunit 2 | RPN2    |
| P62277 | RS13_HUMAN   | 40S ribosomal protein S13                                                | RPS13   |
| P62249 | RS16_HUMAN   | 40S ribosomal protein S16                                                | RPS16   |
| P62269 | RS18_HUMAN   | 40S ribosomal protein S18                                                | RPS18   |
| P15880 | RS2_HUMAN    | 40S ribosomal protein S2                                                 | RPS2    |
| P62701 | RS4X_HUMAN   | 40S ribosomal protein S4                                                 | RPS4X   |
| P62753 | RS6_HUMAN    | 40S ribosomal protein S6                                                 | RPS6    |
| P10301 | RRAS_HUMAN   | Ras-related protein R-Ras                                                | RRAS    |
| Q15404 | RSU1_HUMAN   | Ras suppressor protein 1                                                 | RSU1    |
| Q9NQC3 | RTN4_HUMAN   | Reticulon-4                                                              | RTN4    |
| Q9Y265 | RUVB1_HUMAN  | RuvB-like 1                                                              | RUVBL1  |
| P60903 | S10AA_HUMAN  | Protein S100-A10                                                         | S100A10 |
| P31949 | S10AB_HUMAN  | Protein S100-A11                                                         | S100A11 |
| P80511 | S10AC_HUMAN  | Protein S100-A12                                                         | S100A12 |
| P06703 | S10A6_HUMAN  | Protein S100-A6                                                          | S100A6  |
| Q9NTJ5 | SAC1_HUMAN   | Phosphatidylinositide phosphatase SAC1                                   | SACM1L  |
| Q9Y3Z3 | SAMH1_HUMAN  | Deoxynucleoside triphosphate triphosphohydrolase SAMHD1                  | SAMHD1  |
| O15127 | SCAM2_HUMAN  | Secretory carrier-associated membrane protein 2                          | SCAMP2  |
| Q14108 | SCRIB2_HUMAN | Lysosome membrane protein 2                                              | SCARB2  |
| P22307 | NLTP_HUMAN   | Non-specific lipid-transfer protein                                      | SCP2    |
| O00560 | SDCB1_HUMAN  | Syntenin-1                                                               | SDCBP   |

|        |             |                                                                                  |          |
|--------|-------------|----------------------------------------------------------------------------------|----------|
| P67812 | SC11A_HUMAN | Signal peptidase complex catalytic subunit SEC11A                                | SEC11A   |
| O75396 | SC22B_HUMAN | Vesicle-trafficking protein SEC22b                                               | SEC22B   |
| Q9UGP8 | SEC63_HUMAN | Translocation protein SEC63 homolog                                              | SEC63    |
| P49908 | SEPP1_HUMAN | Selenoprotein P                                                                  | SELENOP  |
| Q9NVA2 | SEP11_HUMAN | Septin-11                                                                        | 11-sept  |
| P50454 | SERPH_HUMAN | Serpin H1                                                                        | SERPINH1 |
| Q01105 | SET_HUMAN   | Protein SET                                                                      | SET      |
| O15389 | SIGL5_HUMAN | Sialic acid-binding Ig-like lectin 5                                             | SIGLEC5  |
| Q9Y336 | SIGL9_HUMAN | Sialic acid-binding Ig-like lectin 9                                             | SIGLEC9  |
| P78324 | SHPS1_HUMAN | Tyrosine-protein phosphatase non-receptor type substrate 1                       | SIRPA    |
| O15427 | MOT4_HUMAN  | Monocarboxylate transporter 4                                                    | SLC16A3  |
| Q00325 | MPCP_HUMAN  | Phosphate carrier protein                                                        | SLC25A3  |
| P05141 | ADT2_HUMAN  | ADP/ATP translocase 2                                                            | SLC25A5  |
| O14975 | S27A2_HUMAN | Very long-chain acyl-CoA synthetase                                              | SLC27A2  |
| P11166 | GTR1_HUMAN  | Solute carrier family 2                                                          | SLC2A1   |
| P11169 | GTR3_HUMAN  | Solute carrier family 2                                                          | SLC2A3   |
| P08195 | 4F2_HUMAN   | 4F2 cell-surface antigen heavy chain                                             | SLC3A2   |
| Q8WWI5 | CTL1_HUMAN  | Choline transporter-like protein 1                                               | SLC44A1  |
| Q8IWA5 | CTL2_HUMAN  | Choline transporter-like protein 2                                               | SLC44A2  |
| P02730 | B3AT_HUMAN  | Band 3 anion transport protein                                                   | SLC4A1   |
| A6NHR9 | SMHD1_HUMAN | Structural maintenance of chromosomes flexible hinge domain-containing protein 1 | SMCHD1   |
| O00161 | SNP23_HUMAN | Synaptosomal-associated protein 23                                               | SNAP23   |
| Q92673 | SORL_HUMAN  | Sortilin-related receptor                                                        | SORL1    |
| Q15005 | SPCS2_HUMAN | Signal peptidase complex subunit 2                                               | SPCS2    |
| P16150 | LEUK_HUMAN  | Leukosialin                                                                      | SPN      |
| P10451 | OSTP_HUMAN  | Osteopontin                                                                      | SPP1     |
| Q13103 | SPP24_HUMAN | Secreted phosphoprotein 24                                                       | SPP2     |
| P02549 | SPTA1_HUMAN | Spectrin alpha chain                                                             | SPTA1    |
| P11277 | SPTB1_HUMAN | Spectrin beta chain                                                              | SPTB     |
| Q6ZRS2 | SRCAP_HUMAN | Helicase SRCAP                                                                   | SRCAP    |
| P30626 | SORCN_HUMAN | Sorcin                                                                           | SRI      |
| Q9Y5M8 | SRPRB_HUMAN | Signal recognition particle receptor subunit beta                                | SRPRB    |
| Q01130 | SRSF2_HUMAN | Serine/arginine-rich splicing factor 2                                           | SRSF2    |

|        |             |                                                                              |         |
|--------|-------------|------------------------------------------------------------------------------|---------|
| Q16629 | SRSF7_HUMAN | Serine/arginine-rich splicing factor 7                                       | SRSF7   |
| P43307 | SSRA_HUMAN  | Translocon-associated protein subunit alpha                                  | SSR1    |
| Q08945 | SSRP1_HUMAN | FACT complex subunit SSRP1                                                   | SSRP1   |
| P50502 | F10A1_HUMAN | Hsc70-interacting protein                                                    | ST13    |
| Q687X5 | STEA4_HUMAN | Metalloreductase STEAP4                                                      | STEAP4  |
| O94804 | STK10_HUMAN | Serine/threonine-protein kinase 10                                           | STK10   |
| P27105 | STOM_HUMAN  | Erythrocyte band 7 integral membrane protein                                 | STOM    |
| P46977 | STT3A_HUMAN | Dolichyl-diphosphooligosaccharide--protein glycosyltransferase subunit STT3A | STT3A   |
| Q8TCJ2 | STT3B_HUMAN | Dolichyl-diphosphooligosaccharide--protein glycosyltransferase subunit STT3B | STT3B   |
| O75558 | STX11_HUMAN | Syntaxin-11                                                                  | STX11   |
| Q13277 | STX3_HUMAN  | Syntaxin-3                                                                   | STX3    |
| O15400 | STX7_HUMAN  | Syntaxin-7                                                                   | STX7    |
| Q15833 | STXB2_HUMAN | Syntaxin-binding protein 2                                                   | STXBP2  |
| O00186 | STXB3_HUMAN | Syntaxin-binding protein 3                                                   | STXBP3  |
| P53999 | TCP4_HUMAN  | Activated RNA polymerase II transcriptional coactivator p15                  | SUB1    |
| P50225 | ST1A1_HUMAN | Sulfotransferase 1A1                                                         | SULT1A1 |
| Q8NB7  | SUMF2_HUMAN | Sulfatase-modifying factor 2                                                 | SUMF2   |
| Q9UH99 | SUN2_HUMAN  | SUN domain-containing protein 2                                              | SUN2    |
| O15260 | SURF4_HUMAN | Surfeit locus protein 4                                                      | SURF4   |
| P43405 | KSYK_HUMAN  | Tyrosine-protein kinase SYK                                                  | SYK     |
| O15533 | TPSN_HUMAN  | Tapasin                                                                      | TAPBP   |
| P24557 | THAS_HUMAN  | Thromboxane-A synthase                                                       | TBXAS1  |
| Q13488 | VPP3_HUMAN  | V-type proton ATPase 116 kDa subunit a isoform 3                             | TCIRG1  |
| P20061 | TCO1_HUMAN  | Transcobalamin-1                                                             | TCN1    |
| P17987 | TCPA_HUMAN  | T-complex protein 1 subunit alpha                                            | TCP1    |
| Q9NZ01 | TECR_HUMAN  | Very-long-chain enoyl-CoA reductase                                          | TECR    |
| P21980 | TGM2_HUMAN  | Protein-glutamine gamma-glutamyltransferase 2                                | TGM2    |
| P04216 | THY1_HUMAN  | Thy-1 membrane glycoprotein                                                  | THY1    |
| O60603 | TLR2_HUMAN  | Toll-like receptor 2                                                         | TLR2    |
| Q9NR97 | TLR8_HUMAN  | Toll-like receptor 8                                                         | TLR8    |
| Q99805 | TM9S2_HUMAN | Transmembrane 9 superfamily member 2                                         | TM9SF2  |
| Q9HD45 | TM9S3_HUMAN | Transmembrane 9 superfamily member 3                                         | TM9SF3  |
| Q9UM00 | TMCO1_HUMAN | Calcium load-activated calcium channel                                       | TMCO1   |

|        |             |                                                  |          |
|--------|-------------|--------------------------------------------------|----------|
| P49755 | TMEDA_HUMAN | Transmembrane emp24 domain-containing protein 10 | TMED10   |
| Q15363 | TMED2_HUMAN | Transmembrane emp24 domain-containing protein 2  | TMED2    |
| Q9Y3A6 | TMED5_HUMAN | Transmembrane emp24 domain-containing protein 5  | TMED5    |
| Q9Y3B3 | TMED7_HUMAN | Transmembrane emp24 domain-containing protein 7  | TMED7    |
| Q9BVK6 | TMED9_HUMAN | Transmembrane emp24 domain-containing protein 9  | TMED9    |
| Q86WV6 | STING_HUMAN | Stimulator of interferon genes protein           | TMEM173  |
| Q9NV96 | CC50A_HUMAN | Cell cycle control protein 50A                   | TMEM30A  |
| P57088 | TMM33_HUMAN | Transmembrane protein 33                         | TMEM33   |
| Q9BTV4 | TMM43_HUMAN | Transmembrane protein 43                         | TMEM43   |
| O94886 | CSCL1_HUMAN | CSC1-like protein 1                              | TMEM63A  |
| Q9H3N1 | TMX1_HUMAN  | Thioredoxin-related transmembrane protein 1      | TMX1     |
| Q96JJ7 | TMX3_HUMAN  | Protein disulfide-isomerase TMX3                 | TMX3     |
| Q9H1E5 | TMX4_HUMAN  | Thioredoxin-related transmembrane protein 4      | TMX4     |
| O95379 | TFIP8_HUMAN | Tumor necrosis factor alpha-induced protein 8    | TNFAIP8  |
| P63316 | TNNC1_HUMAN | Troponin C                                       | TNNC1    |
| P02585 | TNNC2_HUMAN | Troponin C                                       | TNNC2    |
| P19237 | TNNI1_HUMAN | Troponin I                                       | TNNI1    |
| O60784 | TOM1_HUMAN  | Target of Myb protein 1                          | TOM1     |
| Q5JTV8 | TOIP1_HUMAN | Torsin-1A-interacting protein 1                  | TOR1AIP1 |
| O14683 | P5I11_HUMAN | Tumor protein p53-inducible protein 11           | TP53I11  |
| P09493 | TPM1_HUMAN  | Tropomyosin alpha-1 chain                        | TPM1     |
| O14773 | TPP1_HUMAN  | Tripeptidyl-peptidase 1                          | TPP1     |
| P29144 | TPP2_HUMAN  | Tripeptidyl-peptidase 2                          | TPP2     |
| Q8NG11 | TSN14_HUMAN | Tetraspanin-14                                   | TSPAN14  |
| P30536 | TSPO_HUMAN  | Translocator protein                             | TSPO     |
| P68366 | TBA4A_HUMAN | Tubulin alpha-4A chain                           | TUBA4A   |
| P07437 | TBB5_HUMAN  | Tubulin beta chain                               | TUBB     |
| Q8NBS9 | TXND5_HUMAN | Thioredoxin domain-containing protein 5          | TXNDC5   |
| Q9H3M7 | TXNIP_HUMAN | Thioredoxin-interacting protein                  | TXNIP    |
| P19971 | TYPH_HUMAN  | Thymidine phosphorylase                          | TYMP     |
| O43914 | TYOBP_HUMAN | TYRO protein tyrosine kinase-binding protein     | TYROBP   |
| P61088 | UBE2N_HUMAN | Ubiquitin-conjugating enzyme E2 N                | UBE2N    |
| Q5T4S7 | UBR4_HUMAN  | E3 ubiquitin-protein ligase UBR4                 | UBR4     |

|        |             |                                                          |           |
|--------|-------------|----------------------------------------------------------|-----------|
| Q9NYU2 | UGGG1_HUMAN | UDP-glucose:glycoprotein glucosyltransferase 1           | UGGT1     |
| P22695 | QCR2_HUMAN  | Cytochrome b-c1 complex subunit 2                        | UQCRC2    |
| P47985 | UCRI_HUMAN  | Cytochrome b-c1 complex subunit Rieske                   | UQCRFS1   |
| Q15836 | VAMP3_HUMAN | Vesicle-associated membrane protein 3                    | VAMP3     |
| P51809 | VAMP7_HUMAN | Vesicle-associated membrane protein 7                    | VAMP7     |
| Q9P0L0 | VAPA_HUMAN  | Vesicle-associated membrane protein-associated protein A | VAPA      |
| P50552 | VASP_HUMAN  | Vasodilator-stimulated phosphoprotein                    | VASP      |
| Q99536 | VAT1_HUMAN  | Synaptic vesicle membrane protein VAT-1 homolog          | VAT1      |
| P15498 | VAV_HUMAN   | Proto-oncogene vav                                       | VAV1      |
| P18206 | VINC_HUMAN  | Vinculin                                                 | VCL       |
| P45880 | VDAC2_HUMAN | Voltage-dependent anion-selective channel protein 2      | VDAC2     |
| Q96GC9 | VMP1_HUMAN  | Vacuole membrane protein 1                               | VMP1      |
| O95497 | VNN1_HUMAN  | Pantetheinase                                            | VNN1      |
| O95498 | VNN2_HUMAN  | Vascular non-inflammatory molecule 2                     | VNN2      |
| Q96QK1 | VPS35_HUMAN | Vacuolar protein sorting-associated protein 35           | VPS35     |
| Q9Y6W5 | WASF2_HUMAN | Wiskott-Aldrich syndrome protein family member 2         | WASF2     |
| O75083 | WDR1_HUMAN  | WD repeat-containing protein 1                           | WDR1      |
| P13010 | XRCC5_HUMAN | X-ray repair cross-complementing protein 5               | XRCC5     |
| P12956 | XRCC6_HUMAN | X-ray repair cross-complementing protein 6               | XRCC6     |
| P67809 | YBOX1_HUMAN | Nuclease-sensitive element-binding protein 1             | YBX1      |
| Q15942 | ZYX_HUMAN   | Zyxin                                                    | ZYX       |
| P01602 | KV105_HUMAN | Immunoglobulin kappa variable 1-5                        | IGKV1-5   |
| P01599 | KV117_HUMAN | Immunoglobulin kappa variable 1-17                       | IGKV1-17  |
| P01611 | KVD12_HUMAN | Immunoglobulin kappa variable 1D-12                      | IGKV1D-12 |
| P01597 | KV139_HUMAN | Immunoglobulin kappa variable 1-39                       | IGKV1-39  |
| P01593 | KVD33_HUMAN | Immunoglobulin kappa variable 1D-33                      | IGKV1D-33 |
| P06312 | KV401_HUMAN | Immunoglobulin kappa variable 4-1                        | IGKV4-1   |
| P01701 | LV151_HUMAN | Immunoglobulin lambda variable 1-51                      | IGLV1-51  |
| P01706 | LV211_HUMAN | Immunoglobulin lambda variable 2-11                      | IGLV2-11  |
| P01714 | LV319_HUMAN | Immunoglobulin lambda variable 3-19                      | IGLV3-19  |
| P01717 | LV325_HUMAN | Immunoglobulin lambda variable 3-25                      | IGLV3-25  |
| P01743 | HV146_HUMAN | Immunoglobulin heavy variable 1-46                       | IGHV1-46  |
| P01764 | HV323_HUMAN | Immunoglobulin heavy variable 3-23                       | IGHV3-23  |

|        |             |                                     |           |
|--------|-------------|-------------------------------------|-----------|
| P01768 | HV330_HUMAN | Immunoglobulin heavy variable 3-30  | IGHV3-30  |
| P01624 | KV315_HUMAN | Immunoglobulin kappa variable 3-15  | IGKV3-15  |
| P01700 | LV147_HUMAN | Immunoglobulin lambda variable 1-47 | IGLV1-47  |
| P01704 | LV214_HUMAN | Immunoglobulin lambda variable 2-14 | IGLV2-14  |
| P04211 | LV743_HUMAN | Immunoglobulin lambda variable 7-43 | IGLV7-43  |
| P01871 | IGHM_HUMAN  | Immunoglobulin heavy constant mu    | IGHM      |
| P04430 | KV116_HUMAN | Immunoglobulin kappa variable 1-16  | IGKV1-16  |
| P01814 | HV270_HUMAN | Immunoglobulin heavy variable 2-70  | IGHV2-70  |
| P01615 | KVD28_HUMAN | Immunoglobulin kappa variable 2D-28 | IGKV2D-28 |
| P06310 | KV230_HUMAN | Immunoglobulin kappa variable 2-30  | IGKV2-30  |
| P01619 | KV320_HUMAN | Immunoglobulin kappa variable 3-20  | IGKV3-20  |
| P23083 | HV102_HUMAN | Immunoglobulin heavy variable 1-2   | IGHV1-2   |
| P01780 | HV307_HUMAN | Immunoglobulin heavy variable 3-7   | IGHV3-7   |
