# Supplementary material for: Use of extracellular vesicles from lymphatic drainage as surrogate markers of melanoma progression and BRAFV600E mutation
Source: PubMed Central journal article supplement — J Exp Med. 2019 Apr 11;216(5):1061–70. doi: 10.1084/jem.20181522 (PMC6504207; doi:10.1084/jem.20181522), 2019-04-11
Supplement: JEM_20181522_TableS9.pdf [file JEM_20181522_TableS9.pdf]

**Table S9. Proteins upregulated in ES-derived exosomes from N3 vs. N1a melanoma patients**

| Entry  | Entry name  | Protein names                                                           | Gene name |
|--------|-------------|-------------------------------------------------------------------------|-----------|
| P61160 | ARP2_HUMAN  | Actin-related protein 2                                                 | ACTR2     |
| P80108 | PHLD_HUMAN  | Phosphatidylinositol-glycan-specific phospholipase D                    | GPLD1     |
| Q9H4A4 | AMPB_HUMAN  | Aminopeptidase B                                                        | RNPEP     |
| P11586 | C1TC_HUMAN  | C-1-tetrahydrofolate synthase                                           | MTHFD1    |
| Q13790 | APOF_HUMAN  | Apolipoprotein F                                                        | APOF      |
| P27169 | PON1_HUMAN  | Serum paraoxonase/arylesterase 1                                        | PON1      |
| O00187 | MASP2_HUMAN | Mannan-binding lectin serine protease 2                                 | MASP2     |
| Q9NQ79 | CRAC1_HUMAN | Cartilage acidic protein 1                                              | CRTAC1    |
| P31151 | S10A7_HUMAN | Protein S100-A7                                                         | S100A7    |
| P02452 | CO1A1_HUMAN | Collagen alpha-1                                                        | COL1A1    |
| P19971 | TYPH_HUMAN  | Thymidine phosphorylase                                                 | TYMP      |
| P43490 | NAMPT_HUMAN | Nicotinamide phosphoribosyltransferase                                  | NAMPT     |
| P08779 | K1C16_HUMAN | Keratin                                                                 | KRT16     |
| Q8IX19 | MCEM1_HUMAN | Mast cell-expressed membrane protein 1                                  | MCEMP1    |
| P60033 | CD81_HUMAN  | CD81 antigen                                                            | CD81      |
| P05387 | RLA2_HUMAN  | 60S acidic ribosomal protein P2                                         | RPLP2     |
| P24071 | FCAR_HUMAN  | Immunoglobulin alpha Fc receptor                                        | FCAR      |
| P43652 | AFAM_HUMAN  | Afamin                                                                  | AFM       |
| P69892 | HBG2_HUMAN  | Hemoglobin subunit gamma-2                                              | HBG2      |
| P50570 | DYN2_HUMAN  | Dynamin-2                                                               | DNM2      |
| Q9UM07 | PADI4_HUMAN | Protein-arginine deiminase type-4                                       | PADI4     |
| P08865 | RSSA_HUMAN  | 40S ribosomal protein SA                                                | RPSA      |
| P01880 | IGHD_HUMAN  | Immunoglobulin heavy constant delta                                     | IGHD      |
| P67775 | PP2AA_HUMAN | Serine/threonine-protein phosphatase 2A catalytic subunit alpha isoform | PPP2CA    |
| P49795 | RGS19_HUMAN | Regulator of G-protein signaling 19                                     | RGS19     |
| Q96KP4 | CNDP2_HUMAN | Cytosolic non-specific dipeptidase                                      | CNDP2     |
| P15924 | DESP_HUMAN  | Desmoplakin                                                             | DSP       |
| P09110 | THIK_HUMAN  | 3-ketoacyl-CoA thiolase                                                 | ACAA1     |
| P23526 | SAHH_HUMAN  | Adenosylhomocysteinase                                                  | AHCY      |
| P33908 | MA1A1_HUMAN | Mannosyl-oligosaccharide 1                                              | MAN1A1    |
| O15511 | ARPC5_HUMAN | Actin-related protein 2/3 complex subunit 5                             | ARPC5     |

|        |             |                                                           |          |
|--------|-------------|-----------------------------------------------------------|----------|
| P84095 | RHOG_HUMAN  | Rho-related GTP-binding protein RhoG                      | RHOG     |
| P14923 | PLAK_HUMAN  | Junction plakoglobin                                      | JUP      |
| P53396 | ACLY_HUMAN  | ATP-citrate synthase                                      | ACLY     |
| P43250 | GRK6_HUMAN  | G protein-coupled receptor kinase 6                       | GRK6     |
| O00186 | STXB3_HUMAN | Syntaxin-binding protein 3                                | STXBP3   |
| Q9BWP8 | COL11_HUMAN | Collectin-11                                              | COLEC11  |
| P02776 | PLF4_HUMAN  | Platelet factor 4                                         | PF4      |
| P06727 | APOA4_HUMAN | Apolipoprotein A-IV                                       | APOA4    |
| P06681 | CO2_HUMAN   | Complement C2                                             | C2       |
| P12110 | CO6A2_HUMAN | Collagen alpha-2                                          | COL6A2   |
| Q8NDH2 | CC168_HUMAN | Coiled-coil domain-containing protein 168                 | CCDC168  |
| P05109 | S10A8_HUMAN | Protein S100-A8                                           | S100A8   |
| P28482 | MK01_HUMAN  | Mitogen-activated protein kinase 1                        | MAPK1    |
| O15143 | ARC1B_HUMAN | Actin-related protein 2/3 complex subunit 1B              | ARPC1B   |
| P52790 | HXK3_HUMAN  | Hexokinase-3                                              | HK3      |
| P02655 | APOC2_HUMAN | Apolipoprotein C-II                                       | APOC2    |
| P00918 | CAH2_HUMAN  | Carbonic anhydrase 2                                      | CA2      |
| P08123 | CO1A2_HUMAN | Collagen alpha-2                                          | COL1A2   |
| Q9H1E5 | TMX4_HUMAN  | Thioredoxin-related transmembrane protein 4               | TMX4     |
| P50225 | ST1A1_HUMAN | Sulfotransferase 1A1                                      | SULT1A1  |
| P61978 | HNRPK_HUMAN | Heterogeneous nuclear ribonucleoprotein K                 | HNRNPK   |
| Q9BQA9 | CQ062_HUMAN | Uncharacterized protein C17orf62                          | C17orf62 |
| P61163 | ACTZ_HUMAN  | Alpha-centractin                                          | ACTR1A   |
| P00748 | FA12_HUMAN  | Coagulation factor XII                                    | F12      |
| Q01518 | CAP1_HUMAN  | Adenylyl cyclase-associated protein 1                     | CAP1     |
| Q8N1A0 | KT222_HUMAN | Keratin-like protein KRT222                               | KRT222   |
| P01706 | LV211_HUMAN | Immunoglobulin lambda variable 2-11                       | IGLV2-11 |
| P06733 | ENOA_HUMAN  | Alpha-enolase                                             | ENO1     |
| P21399 | ACOC_HUMAN  | Cytoplasmic aconitate hydratase                           | ACO1     |
| P06702 | S10A9_HUMAN | Protein S100-A9                                           | S100A9   |
| P31997 | CEAM8_HUMAN | Carcinoembryonic antigen-related cell adhesion molecule 8 | CEACAM8  |
| P05089 | ARG1_HUMAN  | Arginase-1                                                | ARG1     |
| Q9Y2Q3 | GSTK1_HUMAN | Glutathione S-transferase kappa 1                         | GSTK1    |
| P02649 | APOE_HUMAN  | Apolipoprotein E                                          | APOE     |

|        |             |                                                           |          |
|--------|-------------|-----------------------------------------------------------|----------|
| Q96C19 | EFHD2_HUMAN | EF-hand domain-containing protein D2                      | EFHD2    |
| Q96HE7 | ERO1A_HUMAN | ERO1-like protein alpha                                   | ERO1A    |
| Q8NBS9 | TXND5_HUMAN | Thioredoxin domain-containing protein 5                   | TXNDC5   |
| Q5Y7A7 | 2B1D_HUMAN  | HLA class II histocompatibility antigen                   | HLA-DRB1 |
| P14598 | NCF1_HUMAN  | Neutrophil cytosol factor 1                               | NCF1     |
| P11234 | RALB_HUMAN  | Ras-related protein Ral-B                                 | RALB     |
| P49023 | PAXI_HUMAN  | Paxillin                                                  | PXN      |
| Q9Y5M8 | SRPRB_HUMAN | Signal recognition particle receptor subunit beta         | SRPRB    |
| P02656 | APOC3_HUMAN | Apolipoprotein C-III                                      | APOC3    |
| P31146 | COR1A_HUMAN | Coronin-1A                                                | CORO1A   |
| P28065 | PSB9_HUMAN  | Proteasome subunit beta type-9                            | PSMB9    |
| P04278 | SHBG_HUMAN  | Sex hormone-binding globulin                              | SHBG     |
| Q08211 | DHX9_HUMAN  | ATP-dependent RNA helicase A                              | DHX9     |
| Q01432 | AMPD3_HUMAN | AMP deaminase 3                                           | AMPD3    |
| P41218 | MNDA_HUMAN  | Myeloid cell nuclear differentiation antigen              | MNDA     |
| P12318 | FCG2A_HUMAN | Low affinity immunoglobulin gamma Fc region receptor II-a | FCGR2A   |
| P01861 | IGHG4_HUMAN | Immunoglobulin heavy constant gamma 4                     | IGHG4    |
| P47756 | CAPZB_HUMAN | F-actin-capping protein subunit beta                      | CAPZB    |
| P62913 | RL11_HUMAN  | 60S ribosomal protein L11                                 | RPL11    |
| P54709 | AT1B3_HUMAN | Sodium/potassium-transporting ATPase subunit beta-3       | ATP1B3   |
| P02042 | HBD_HUMAN   | Hemoglobin subunit delta                                  | HBD      |
| P06276 | CHLE_HUMAN  | Cholinesterase                                            | BCHE     |
| P52907 | CAZA1_HUMAN | F-actin-capping protein subunit alpha-1                   | CAPZA1   |
| Q9C0E8 | LNP_HUMAN   | Endoplasmic reticulum junction formation protein lunapark | LNPK     |
| P57737 | CORO7_HUMAN | Coronin-7                                                 | CORO7    |
| P19878 | NCF2_HUMAN  | Neutrophil cytosol factor 2                               | NCF2     |
| Q00839 | HNRPU_HUMAN | Heterogeneous nuclear ribonucleoprotein U                 | HNRNPU   |
| P63218 | GBG5_HUMAN  | Guanine nucleotide-binding protein G                      | GNG5     |
| Q6UX06 | OLFM4_HUMAN | Olfactomedin-4                                            | OLFM4    |
| O60234 | GMFG_HUMAN  | Glia maturation factor gamma                              | GMFG     |
| Q9UGP8 | SEC63_HUMAN | Translocation protein SEC63 homolog                       | SEC63    |
| P11678 | PERE_HUMAN  | Eosinophil peroxidase                                     | EPX      |
| Q92608 | DOCK2_HUMAN | Dedicator of cytokinesis protein 2                        | DOCK2    |
| P17858 | PFKAL_HUMAN | ATP-dependent 6-phosphofructokinase                       | PFKL     |

|        |             |                                                                                  |              |
|--------|-------------|----------------------------------------------------------------------------------|--------------|
| P15498 | VAV_HUMAN   | Proto-oncogene vav                                                               | VAV1         |
| P07384 | CAN1_HUMAN  | Calpain-1 catalytic subunit                                                      | CAPN1        |
| P15311 | EZRI_HUMAN  | Ezrin                                                                            | EZR          |
| O94804 | STK10_HUMAN | Serine/threonine-protein kinase 10                                               | STK10        |
| A6NHR9 | SMHD1_HUMAN | Structural maintenance of chromosomes flexible hinge domain-containing protein 1 | SMCHD1       |
| Q8NCG7 | DGLB_HUMAN  | Sn1-specific diacylglycerol lipase beta                                          | DAGLB        |
| P37837 | TALDO_HUMAN | Transaldolase                                                                    | TALDO1       |
| Q9UBM7 | DHCR7_HUMAN | 7-dehydrocholesterol reductase                                                   | DHCR7        |
| P22894 | MMP8_HUMAN  | Neutrophil collagenase                                                           | MMP8         |
| P01116 | RASK_HUMAN  | GTPase KRas                                                                      | KRAS         |
| P46940 | IQGA1_HUMAN | Ras GTPase-activating-like protein IQGAP1                                        | IQGAP1       |
| P18669 | PGAM1_HUMAN | Phosphoglycerate mutase 1                                                        | PGAM1        |
| Q9BY15 | AGRE3_HUMAN | Adhesion G protein-coupled receptor E3                                           | ADGRE3       |
| P11413 | G6PD_HUMAN  | Glucose-6-phosphate 1-dehydrogenase                                              | G6PD         |
| Q14289 | FAK2_HUMAN  | Protein-tyrosine kinase 2-beta                                                   | PTK2B        |
| Q8N386 | LRC25_HUMAN | Leucine-rich repeat-containing protein 25                                        | LRRC25       |
| Q13586 | STIM1_HUMAN | Stromal interaction molecule 1                                                   | STIM1        |
| Q92930 | RAB8B_HUMAN | Ras-related protein Rab-8B                                                       | RAB8B        |
| P05154 | IPSP_HUMAN  | Plasma serine protease inhibitor                                                 | SERPINA<br>5 |
| Q9NY25 | CLC5A_HUMAN | C-type lectin domain family 5 member A                                           | CLEC5A       |
| Q96RT1 | ERBIN_HUMAN | Erbin                                                                            | ERBIN        |
| P05388 | RLA0_HUMAN  | 60S acidic ribosomal protein P0                                                  | RPLP0        |
| P07741 | APT_HUMAN   | Adenine phosphoribosyltransferase                                                | APRT         |
| P22695 | QCR2_HUMAN  | Cytochrome b-c1 complex subunit 2                                                | UQCRC2       |
| P31943 | HNRH1_HUMAN | Heterogeneous nuclear ribonucleoprotein H                                        | HNRNPH<br>1  |
| O60449 | LY75_HUMAN  | Lymphocyte antigen 75                                                            | LY75         |
| P13489 | RINI_HUMAN  | Ribonuclease inhibitor                                                           | RNH1         |
| P35606 | COPB2_HUMAN | Coatomer subunit beta'                                                           | COPB2        |
| Q6ZRS2 | SRCAP_HUMAN | Helicase SRCAP                                                                   | SRCAP        |
| Q96QK1 | VPS35_HUMAN | Vacuolar protein sorting-associated protein 35                                   | VPS35        |
| P02753 | RET4_HUMAN  | Retinol-binding protein 4                                                        | RBP4         |
| Q8IWA5 | CTL2_HUMAN  | Choline transporter-like protein 2                                               | SLC44A2      |
| O14975 | S27A2_HUMAN | Very long-chain acyl-CoA synthetase                                              | SLC27A2      |
| O00299 | CLIC1_HUMAN | Chloride intracellular channel protein 1                                         | CLIC1        |

|        |             |                                                                        |         |
|--------|-------------|------------------------------------------------------------------------|---------|
| O95497 | VNN1_HUMAN  | Pantetheinase                                                          | VNN1    |
| Q6P4A8 | PLBL1_HUMAN | Phospholipase B-like 1                                                 | PLBD1   |
| P17213 | BPI_HUMAN   | Bactericidal permeability-increasing protein                           | BPI     |
| P14618 | KPYM_HUMAN  | Pyruvate kinase PKM                                                    | PKM     |
| P10809 | CH60_HUMAN  | 60 kDa heat shock protein                                              | HSPD1   |
| O95573 | ACSL3_HUMAN | Long-chain-fatty-acid--CoA ligase 3                                    | ACSL3   |
| Q7Z7G0 | TARSH_HUMAN | Target of Nesh-SH3                                                     | ABI3BP  |
| P63000 | RAC1_HUMAN  | Ras-related C3 botulinum toxin substrate 1                             | RAC1    |
| Q6PI73 | LIRA6_HUMAN | Leukocyte immunoglobulin-like receptor subfamily A member 6            | LILRA6  |
| P25774 | CATS_HUMAN  | Cathepsin S                                                            | CTSS    |
| P09326 | CD48_HUMAN  | CD48 antigen                                                           | CD48    |
| Q14204 | DYHC1_HUMAN | Cytoplasmic dynein 1 heavy chain 1                                     | DYNC1H1 |
| P10620 | MGST1_HUMAN | Microsomal glutathione S-transferase 1                                 | MGST1   |
| P69905 | HBA_HUMAN   | Hemoglobin subunit alpha                                               | HBA1    |
| Q9BT09 | CNPY3_HUMAN | Protein canopy homolog 3                                               | CNPY3   |
| P02766 | TTHY_HUMAN  | Transthyretin                                                          | TTR     |
| P40926 | MDHM_HUMAN  | Malate dehydrogenase                                                   | MDH2    |
| P62136 | PP1A_HUMAN  | Serine/threonine-protein phosphatase PP1-alpha catalytic subunit       | PPP1CA  |
| Q5QGZ9 | CL12A_HUMAN | C-type lectin domain family 12 member A                                | CLEC12A |
| P59666 | DEF3_HUMAN  | Neutrophil defensin 3                                                  | DEFA3   |
| P20061 | TCO1_HUMAN  | Transcobalamin-1                                                       | TCN1    |
| P17655 | CAN2_HUMAN  | Calpain-2 catalytic subunit                                            | CAPN2   |
| O15400 | STX7_HUMAN  | Syntaxin-7                                                             | STX7    |
| P10909 | CLUS_HUMAN  | Clusterin                                                              | CLU     |
| P13647 | K2C5_HUMAN  | Keratin                                                                | KRT5    |
| Q13177 | PAK2_HUMAN  | Serine/threonine-protein kinase PAK 2                                  | PAK2    |
| P10768 | ESTD_HUMAN  | S-formylglutathione hydrolase                                          | ESD     |
| P35858 | ALS_HUMAN   | Insulin-like growth factor-binding protein complex acid labile subunit | IGFALS  |
| Q53EU6 | GPAT3_HUMAN | Glycerol-3-phosphate acyltransferase 3                                 | GPAT3   |
| Q14728 | MFS10_HUMAN | Major facilitator superfamily domain-containing protein 10             | MFSD10  |
| P35542 | SAA4_HUMAN  | Serum amyloid A-4 protein                                              | SAA4    |
| P00491 | PNPH_HUMAN  | Purine nucleoside phosphorylase                                        | PNP     |
| Q9UKX2 | MYH2_HUMAN  | Myosin-2                                                               | MYH2    |
| Q05707 | COEA1_HUMAN | Collagen alpha-1                                                       | COL14A1 |
| O75083 | WDR1_HUMAN  | WD repeat-containing protein 1                                         | WDR1    |

|        |             |                                                                              |              |
|--------|-------------|------------------------------------------------------------------------------|--------------|
| Q9NV96 | CC50A_HUMAN | Cell cycle control protein 50A                                               | TMEM30A      |
| P30508 | 1C12_HUMAN  | HLA class I histocompatibility antigen                                       | HLA-C        |
| Q9H4M9 | EHD1_HUMAN  | EH domain-containing protein 1                                               | EHD1         |
| Q9Y2G3 | AT11B_HUMAN | Probable phospholipid-transporting ATPase IF                                 | ATP11B       |
| Q15582 | BGH3_HUMAN  | Transforming growth factor-beta-induced protein ig-h3                        | TGFBI        |
| Q99828 | CIB1_HUMAN  | Calcium and integrin-binding protein 1                                       | CIB1         |
| P50552 | VASP_HUMAN  | Vasodilator-stimulated phosphoprotein                                        | VASP         |
| P63244 | RACK1_HUMAN | Receptor of activated protein C kinase 1                                     | RACK1        |
| O43914 | TYOBP_HUMAN | TYRO protein tyrosine kinase-binding protein                                 | TYROBP       |
| Q8NG11 | TSN14_HUMAN | Tetraspanin-14                                                               | TSPAN14      |
| Q15155 | NOMO1_HUMAN | Nodal modulator 1                                                            | NOMO1        |
| Q96JJ7 | TMX3_HUMAN  | Protein disulfide-isomerase TMX3                                             | TMX3         |
| P08519 | APOA_HUMAN  | Apolipoprotein                                                               | LPA          |
| P08246 | ELNE_HUMAN  | Neutrophil elastase                                                          | ELANE        |
| Q9Y4H4 | GPSM3_HUMAN | G-protein-signaling modulator 3                                              | GPSM3        |
| P49368 | TCPG_HUMAN  | T-complex protein 1 subunit gamma                                            | CCT3         |
| Q8TCJ2 | STT3B_HUMAN | Dolichyl-diphosphooligosaccharide--protein glycosyltransferase subunit STT3B | STT3B        |
| O75348 | VATG1_HUMAN | V-type proton ATPase subunit G 1                                             | ATP6V1G<br>1 |
| Q53GQ0 | DHB12_HUMAN | Very-long-chain 3-oxoacyl-CoA reductase                                      | HSD17B1<br>2 |
| Q01628 | IFM3_HUMAN  | Interferon-induced transmembrane protein 3                                   | IFITM3       |
| Q96G03 | PGM2_HUMAN  | Phosphoglucomutase-2                                                         | PGM2         |
| P24158 | PRTN3_HUMAN | Myeloblastin                                                                 | PRTN3        |
| Q9UGM5 | FETUB_HUMAN | Fetuin-B                                                                     | FETUB        |
| P02786 | TFR1_HUMAN  | Transferrin receptor protein 1                                               | TFRC         |
| P01111 | RASN_HUMAN  | GTPase NRas                                                                  | NRAS         |
| P26038 | MOES_HUMAN  | Moesin                                                                       | MSN          |
| P36222 | CH3L1_HUMAN | Chitinase-3-like protein 1                                                   | CHI3L1       |
| P41240 | CSK_HUMAN   | Tyrosine-protein kinase CSK                                                  | CSK          |
| Q16539 | MK14_HUMAN  | Mitogen-activated protein kinase 14                                          | MAPK14       |
| P30044 | PRDX5_HUMAN | Peroxiredoxin-5                                                              | PRDX5        |
| Q10588 | BST1_HUMAN  | ADP-ribosyl cyclase/cyclic ADP-ribose hydrolase 2                            | BST1         |
| P25789 | PSA4_HUMAN  | Proteasome subunit alpha type-4                                              | PSMA4        |
| Q14108 | SCRB2_HUMAN | Lysosome membrane protein 2                                                  | SCARB2       |
| P40925 | MDHC_HUMAN  | Malate dehydrogenase                                                         | MDH1         |

|        |             |                                                                                 |              |
|--------|-------------|---------------------------------------------------------------------------------|--------------|
| Q8N423 | LIRB2_HUMAN | Leukocyte immunoglobulin-like receptor subfamily B member 2                     | LILRB2       |
| P01903 | DRA_HUMAN   | HLA class II histocompatibility antigen                                         | HLA-DRA      |
| Q92896 | GSLG1_HUMAN | Golgi apparatus protein 1                                                       | GLG1         |
| O43451 | MGA_HUMAN   | Maltase-glucoamylase                                                            | MGAM         |
| P01764 | HV323_HUMAN | Immunoglobulin heavy variable 3-23                                              | IGHV3-23     |
| P15153 | RAC2_HUMAN  | Ras-related C3 botulinum toxin substrate 2                                      | RAC2         |
| P08697 | A2AP_HUMAN  | Alpha-2-antiplasmin                                                             | SERPINF<br>2 |
| Q15063 | POSTN_HUMAN | Periostin                                                                       | POSTN        |
| Q7Z5R6 | AB1IP_HUMAN | Amyloid beta A4 precursor protein-binding family B member 1-interacting protein | APBB1IP      |
| P78380 | OLR1_HUMAN  | Oxidized low-density lipoprotein receptor 1                                     | OLR1         |
| Q15722 | LT4R1_HUMAN | Leukotriene B4 receptor 1                                                       | LTB4R        |
| Q15404 | RSU1_HUMAN  | Ras suppressor protein 1                                                        | RSU1         |
| Q99829 | CPNE1_HUMAN | Copine-1                                                                        | CPNE1        |
| Q9UM00 | TMCO1_HUMAN | Calcium load-activated calcium channel                                          | TMCO1        |
| Q99439 | CNN2_HUMAN  | Calponin-2                                                                      | CNN2         |
| P60709 | ACTB_HUMAN  | Actin                                                                           | ACTB         |
| P02790 | HEMO_HUMAN  | Hemopexin                                                                       | HPX          |
| P07737 | PROF1_HUMAN | Profilin-1                                                                      | PFN1         |
| P09960 | LKHA4_HUMAN | Leukotriene A-4 hydrolase                                                       | LTA4H        |
| Q08380 | LG3BP_HUMAN | Galectin-3-binding protein                                                      | LGALS3B<br>P |
| P13796 | PLSL_HUMAN  | Plastin-2                                                                       | LCP1         |
| Q99497 | PARK7_HUMAN | Protein/nucleic acid deglycase DJ-1                                             | PARK7        |
| P98196 | AT11A_HUMAN | Probable phospholipid-transporting ATPase IH                                    | ATP11A       |
| P02724 | GLPA_HUMAN  | Glycophorin-A                                                                   | GYPA         |
| Q15907 | RB11B_HUMAN | Ras-related protein Rab-11B                                                     | RAB11B       |
| P09769 | FGR_HUMAN   | Tyrosine-protein kinase Fgr                                                     | FGR          |
| O15427 | MOT4_HUMAN  | Monocarboxylate transporter 4                                                   | SLC16A3      |
| P29350 | PTN6_HUMAN  | Tyrosine-protein phosphatase non-receptor type 6                                | PTPN6        |
| O94886 | CSCL1_HUMAN | CSC1-like protein 1                                                             | TMEM63A      |
| P00915 | CAH1_HUMAN  | Carbonic anhydrase 1                                                            | CA1          |
| P16070 | CD44_HUMAN  | CD44 antigen                                                                    | CD44         |
| O75558 | STX11_HUMAN | Syntaxin-11                                                                     | STX11        |
| Q9NZM1 | MYOF_HUMAN  | Myoferlin                                                                       | MYOF         |
| P00558 | PGK1_HUMAN  | Phosphoglycerate kinase 1                                                       | PGK1         |

|        |              |                                                                              |              |
|--------|--------------|------------------------------------------------------------------------------|--------------|
| P54819 | KAD2_HUMAN   | Adenylate kinase 2                                                           | AK2          |
| O00391 | QSOX1_HUMAN  | Sulfhydryl oxidase 1                                                         | QSOX1        |
| P02774 | VTDB_HUMAN   | Vitamin D-binding protein                                                    | GC           |
| P68366 | TBA4A_HUMAN  | Tubulin alpha-4A chain                                                       | TUBA4A       |
| Q687X5 | STEAP4_HUMAN | Metalloreductase STEAP4                                                      | STEAP4       |
| Q8N6Q3 | CD177_HUMAN  | CD177 antigen                                                                | CD177        |
| P32119 | PRDX2_HUMAN  | Peroxiredoxin-2                                                              | PRDX2        |
| P32320 | CDD_HUMAN    | Cytidine deaminase                                                           | CDA          |
| P04433 | KV311_HUMAN  | Immunoglobulin kappa variable 3-11                                           | IGKV3-11     |
| Q9Y3A6 | TMED5_HUMAN  | Transmembrane emp24 domain-containing protein 5                              | TMED5        |
| Q86Y34 | AGRG3_HUMAN  | Adhesion G protein-coupled receptor G3                                       | ADGRG3       |
| Q9H3M7 | TXNIP_HUMAN  | Thioredoxin-interacting protein                                              | TXNIP        |
| P07339 | CATD_HUMAN   | Cathepsin D                                                                  | CTSD         |
| P11215 | ITAM_HUMAN   | Integrin alpha-M                                                             | ITGAM        |
| Q15080 | NCF4_HUMAN   | Neutrophil cytosol factor 4                                                  | NCF4         |
| Q02818 | NUCB1_HUMAN  | Nucleobindin-1                                                               | NUCB1        |
| P13688 | CEAM1_HUMAN  | Carcinoembryonic antigen-related cell adhesion molecule 1                    | CEACAM<br>1  |
| P05546 | HEP2_HUMAN   | Heparin cofactor 2                                                           | SERPIND<br>1 |
| P04114 | APOB_HUMAN   | Apolipoprotein B-100                                                         | APOB         |
| P80188 | NGAL_HUMAN   | Neutrophil gelatinase-associated lipocalin                                   | LCN2         |
| P01008 | ANT3_HUMAN   | Antithrombin-III                                                             | SERPINC<br>1 |
| P60660 | MYL6_HUMAN   | Myosin light polypeptide 6                                                   | MYL6         |
| P51149 | RAB7A_HUMAN  | Ras-related protein Rab-7a                                                   | RAB7A        |
| P46977 | STT3A_HUMAN  | Dolichyl-diphosphooligosaccharide--protein glycosyltransferase subunit STT3A | STT3A        |
| P03950 | ANG1_HUMAN   | Angiogenin                                                                   | ANG          |
| P60842 | IF4A1_HUMAN  | Eukaryotic initiation factor 4A-I                                            | EIF4A1       |
| P04406 | G3P_HUMAN    | Glyceraldehyde-3-phosphate dehydrogenase                                     | GAPDH        |
| Q86UX7 | URP2_HUMAN   | Fermitin family homolog 3                                                    | FERMT3       |
| Q99536 | VAT1_HUMAN   | Synaptic vesicle membrane protein VAT-1 homolog                              | VAT1         |
| P80303 | NUCB2_HUMAN  | Nucleobindin-2                                                               | NUCB2        |
| P10644 | KAP0_HUMAN   | cAMP-dependent protein kinase type I-alpha regulatory subunit                | PRKAR1A      |
| P08238 | HS90B_HUMAN  | Heat shock protein HSP 90-beta                                               | HSP90AB<br>1 |



|        |             |                                                                   |          |
|--------|-------------|-------------------------------------------------------------------|----------|
| P36871 | PGM1_HUMAN  | Phosphoglucomutase-1                                              | PGM1     |
| P05186 | PPBT_HUMAN  | Alkaline phosphatase                                              | ALPL     |
| P51648 | AL3A2_HUMAN | Fatty aldehyde dehydrogenase                                      | ALDH3A2  |
| P05155 | IC1_HUMAN   | Plasma protease C1 inhibitor                                      | SERPING1 |
| P50991 | TCPD_HUMAN  | T-complex protein 1 subunit delta                                 | CCT4     |
| P04004 | VTNC_HUMAN  | Vitronectin                                                       | VTN      |
| Q96CX2 | KCD12_HUMAN | BTB/POZ domain-containing protein KCTD12                          | KCTD12   |
| Q12913 | PTPRJ_HUMAN | Receptor-type tyrosine-protein phosphatase eta                    | PTPRJ    |
| Q9NPA2 | MMP25_HUMAN | Matrix metalloproteinase-25                                       | MMP25    |
| Q13555 | KCC2G_HUMAN | Calcium/calmodulin-dependent protein kinase type II subunit gamma | CAMK2G   |
| O15120 | PLCB_HUMAN  | 1-acyl-sn-glycerol-3-phosphate acyltransferase beta               | AGPAT2   |
| O15260 | SURF4_HUMAN | Surfeit locus protein 4                                           | SURF4    |
| P15144 | AMPN_HUMAN  | Aminopeptidase N                                                  | ANPEP    |
| P68871 | HBB_HUMAN   | Hemoglobin subunit beta                                           | HBB      |
| O15145 | ARPC3_HUMAN | Actin-related protein 2/3 complex subunit 3                       | ARPC3    |
| Q9Y6R7 | FCGBP_HUMAN | IgGfC-binding protein                                             | FCGBP    |
| P01814 | HV270_HUMAN | Immunoglobulin heavy variable 2-70                                | IGHV2-70 |
| P02741 | CRP_HUMAN   | C-reactive protein [Cleaved into: C-reactive protein              | CRP      |
| P20292 | AL5AP_HUMAN | Arachidonate 5-lipoxygenase-activating protein                    | ALOX5AP  |
| P01009 | A1AT_HUMAN  | Alpha-1-antitrypsin                                               | SERPINA1 |
| P05534 | 1A24_HUMAN  | HLA class I histocompatibility antigen                            | HLA-A    |
| P18577 | RHCE_HUMAN  | Blood group Rh                                                    | RHCE     |
| P19823 | ITIH2_HUMAN | Inter-alpha-trypsin inhibitor heavy chain H2                      | ITIH2    |
| P01040 | CYTA_HUMAN  | Cystatin-A                                                        | CSTA     |
| P29401 | TKT_HUMAN   | Transketolase                                                     | TKT      |
| O95466 | FMNL1_HUMAN | Formin-like protein 1                                             | FMNL1    |
| O75594 | PGRP1_HUMAN | Peptidoglycan recognition protein 1                               | PGLYRP1  |
| P22314 | UBA1_HUMAN  | Ubiquitin-like modifier-activating enzyme 1                       | UBA1     |
| P05090 | APOD_HUMAN  | Apolipoprotein D                                                  | APOD     |
| P68363 | TBA1B_HUMAN | Tubulin alpha-1B chain                                            | TUBA1B   |
| P38606 | VATA_HUMAN  | V-type proton ATPase catalytic subunit A                          | ATP6V1A  |
| P08195 | 4F2_HUMAN   | 4F2 cell-surface antigen heavy chain                              | SLC3A2   |
| O60784 | TOM1_HUMAN  | Target of Myb protein 1                                           | TOM1     |
| Q96GC9 | VMP1_HUMAN  | Vacuole membrane protein 1                                        | VMP1     |

|        |             |                                                                                   |         |
|--------|-------------|-----------------------------------------------------------------------------------|---------|
| O95479 | G6PE_HUMAN  | GDH/6PGL endoplasmic bifunctional protein [Includes: Glucose 1-dehydrogenase      | H6PD    |
| P06576 | ATPB_HUMAN  | ATP synthase subunit beta                                                         | ATP5F1B |
| P52209 | 6PGD_HUMAN  | 6-phosphogluconate dehydrogenase                                                  | PGD     |
| Q92882 | OSTF1_HUMAN | Osteoclast-stimulating factor 1                                                   | OSTF1   |
| P50502 | F10A1_HUMAN | Hsc70-interacting protein                                                         | ST13    |
| P0DMV8 | HS71A_HUMAN | Heat shock 70 kDa protein 1A                                                      | HSPA1A  |
| P0DMV9 | HS71B_HUMAN | Heat shock 70 kDa protein 1B                                                      | HSPA1B  |
| Q13200 | PSMD2_HUMAN | 26S proteasome non-ATPase regulatory subunit 2                                    | PSMD2   |
| Q05655 | KPCD_HUMAN  | Protein kinase C delta type                                                       | PRKCD   |
| Q99805 | TM9S2_HUMAN | Transmembrane 9 superfamily member 2                                              | TM9SF2  |
| Q8TCT9 | HM13_HUMAN  | Minor histocompatibility antigen H13                                              | HM13    |
| Q9NVJ2 | ARL8B_HUMAN | ADP-ribosylation factor-like protein 8B                                           | ARL8B   |
| P05107 | ITB2_HUMAN  | Integrin beta-2                                                                   | ITGB2   |
| P12956 | XRCC6_HUMAN | X-ray repair cross-complementing protein 6                                        | XRCC6   |
| O15533 | TPSN_HUMAN  | Tapasin                                                                           | TAPBP   |
| P12109 | CO6A1_HUMAN | Collagen alpha-1                                                                  | COL6A1  |
| P30153 | 2AAA_HUMAN  | Serine/threonine-protein phosphatase 2A 65 kDa regulatory subunit A alpha isoform | PPP2R1A |
| P01033 | TIMP1_HUMAN | Metalloproteinase inhibitor 1                                                     | TIMP1   |
| P08294 | SODE_HUMAN  | Extracellular superoxide dismutase [Cu-Zn]                                        | SOD3    |
| A0FGR8 | ESYT2_HUMAN | Extended synaptotagmin-2                                                          | ESYT2   |
| P52566 | GDIR2_HUMAN | Rho GDP-dissociation inhibitor 2                                                  | ARHGDI2 |
| Q9H1C7 | CYTM1_HUMAN | Cysteine-rich and transmembrane domain-containing protein 1                       | CYSTM1  |
| O43169 | CYB5B_HUMAN | Cytochrome b5 type B                                                              | CYB5B   |
| P07437 | TBB5_HUMAN  | Tubulin beta chain                                                                | TUBB    |
| Q08431 | MFGM_HUMAN  | Lactadherin                                                                       | MFGE8   |
| P35579 | MYH9_HUMAN  | Myosin-9                                                                          | MYH9    |
| P53621 | COPA_HUMAN  | Coatamer subunit alpha                                                            | COPA    |
| P68371 | TBB4B_HUMAN | Tubulin beta-4B chain                                                             | TUBB4B  |
| P61626 | LYSC_HUMAN  | Lysozyme C                                                                        | LYZ     |
| P80723 | BASP1_HUMAN | Brain acid soluble protein 1                                                      | BASP1   |
| P02768 | ALBU_HUMAN  | Serum albumin                                                                     | ALB     |
| P00738 | HPT_HUMAN   | Haptoglobin                                                                       | HP      |
| P35749 | MYH11_HUMAN | Myosin-11                                                                         | MYH11   |
| Q15942 | ZYX_HUMAN   | Zyxin                                                                             | ZYX     |

|        |             |                                                         |           |
|--------|-------------|---------------------------------------------------------|-----------|
| P02647 | APOA1_HUMAN | Apolipoprotein A-I                                      | APOA1     |
| P01593 | KVD33_HUMAN | Immunoglobulin kappa variable 1D-33                     | IGKV1D-33 |
| P51159 | RB27A_HUMAN | Ras-related protein Rab-27A                             | RAB27A    |
| P02654 | APOC1_HUMAN | Apolipoprotein C-I                                      | APOC1     |
| P26641 | EF1G_HUMAN  | Elongation factor 1-gamma                               | EEF1G     |
| P55058 | PLTP_HUMAN  | Phospholipid transfer protein                           | PLTP      |
| Q9HDC9 | APMAP_HUMAN | Adipocyte plasma membrane-associated protein            | APMAP     |
| Q14697 | GANAB_HUMAN | Neutral alpha-glucosidase AB                            | GANAB     |
| P13987 | CD59_HUMAN  | CD59 glycoprotein                                       | CD59      |
| Q04917 | 1433F_HUMAN | 14-3-3 protein eta                                      | YWHAH     |
| Q06323 | PSME1_HUMAN | Proteasome activator complex subunit 1                  | PSME1     |
| Q9Y3Z3 | SAMH1_HUMAN | Deoxynucleoside triphosphate triphosphohydrolase SAMHD1 | SAMHD1    |
| Q9Y336 | SIGL9_HUMAN | Sialic acid-binding Ig-like lectin 9                    | SIGLEC9   |
| Q71DI3 | H32_HUMAN   | Histone H3.2                                            | HIST2H3A  |
| P61158 | ARP3_HUMAN  | Actin-related protein 3                                 | ACTR3     |
| P12259 | FA5_HUMAN   | Coagulation factor V                                    | F5        |
| P61981 | 1433G_HUMAN | 14-3-3 protein gamma                                    | YWHAG     |
| O00160 | MYO1F_HUMAN | Unconventional myosin-1f                                | MYO1F     |
| O15258 | RER1_HUMAN  | Protein RER1                                            | RER1      |
| P54108 | CRIS3_HUMAN | Cysteine-rich secretory protein 3                       | CRISP3    |
| P78527 | PRKDC_HUMAN | DNA-dependent protein kinase catalytic subunit          | PRKDC     |
| P30041 | PRDX6_HUMAN | Peroxiredoxin-6                                         | PRDX6     |
| P01602 | KV105_HUMAN | Immunoglobulin kappa variable 1-5                       | IGKV1-5   |
| P00338 | LDHA_HUMAN  | L-lactate dehydrogenase A chain                         | LDHA      |
| P27701 | CD82_HUMAN  | CD82 antigen                                            | CD82      |
| P34910 | EVI2B_HUMAN | Protein EVI2B                                           | EVI2B     |
| Q96FN4 | CPNE2_HUMAN | Copine-2                                                | CPNE2     |
| Q9H0U4 | RAB1B_HUMAN | Ras-related protein Rab-1B                              | RAB1B     |
| P14780 | MMP9_HUMAN  | Matrix metalloproteinase-9                              | MMP9      |
| P28161 | GSTM2_HUMAN | Glutathione S-transferase Mu 2                          | GSTM2     |
| P60953 | CDC42_HUMAN | Cell division control protein 42 homolog                | CDC42     |
| Q96S97 | MYADM_HUMAN | Myeloid-associated differentiation marker               | MYADM     |
| P51888 | PRELP_HUMAN | Prolargin                                               | PRELP     |
| Q9Y6X5 | ENPP4_HUMAN | Bis                                                     | ENPP4     |

|        |             |                                                                |         |
|--------|-------------|----------------------------------------------------------------|---------|
| P02750 | A2GL_HUMAN  | Leucine-rich alpha-2-glycoprotein                              | LRG1    |
| Q13277 | STX3_HUMAN  | Syntaxin-3                                                     | STX3    |
| P19827 | ITIH1_HUMAN | Inter-alpha-trypsin inhibitor heavy chain H1                   | ITIH1   |
| P62937 | PPIA_HUMAN  | Peptidyl-prolyl cis-trans isomerase A                          | PPIA    |
| O00232 | PSD12_HUMAN | 26S proteasome non-ATPase regulatory subunit 12                | PSMD12  |
| P49908 | SEPP1_HUMAN | Selenoprotein P                                                | SELENOP |
| P31949 | S10AB_HUMAN | Protein S100-A11                                               | S100A11 |
| P61088 | UBE2N_HUMAN | Ubiquitin-conjugating enzyme E2 N                              | UBE2N   |
| Q9H223 | EHD4_HUMAN  | EH domain-containing protein 4                                 | EHD4    |
| P00568 | KAD1_HUMAN  | Adenylate kinase isoenzyme 1                                   | AK1     |
| P18463 | 1B37_HUMAN  | HLA class I histocompatibility antigen                         | HLA-B   |
| P55160 | NCKPL_HUMAN | Nck-associated protein 1-like                                  | NCKAP1L |
| P25311 | ZA2G_HUMAN  | Zinc-alpha-2-glycoprotein                                      | AZGP1   |
| P31939 | PUR9_HUMAN  | Bifunctional purine biosynthesis protein PURH                  | ATIC    |
| Q14974 | IMB1_HUMAN  | Importin subunit beta-1                                        | KPNB1   |
| Q8NB7  | SUMF2_HUMAN | Sulfatase-modifying factor 2                                   | SUMF2   |
| P00751 | CFAB_HUMAN  | Complement factor B                                            | CFB     |
| O75915 | PRAF3_HUMAN | PRA1 family protein 3                                          | ARL6IP5 |
| P23528 | COF1_HUMAN  | Cofilin-1                                                      | CFL1    |
| P78324 | SHPS1_HUMAN | Tyrosine-protein phosphatase non-receptor type substrate 1     | SIRPA   |
| Q08477 | CP4F3_HUMAN | Docosahexaenoic acid omega-hydroxylase CYP4F3                  | CYP4F3  |
| P16435 | NCPR_HUMAN  | NADPH--cytochrome P450 reductase                               | POR     |
| O60488 | ACSL4_HUMAN | Long-chain-fatty-acid--CoA ligase 4                            | ACSL4   |
| P06744 | G6PI_HUMAN  | Glucose-6-phosphate isomerase                                  | GPI     |
| Q04941 | PLP2_HUMAN  | Proteolipid protein 2                                          | PLP2    |
| Q969X5 | ERGI1_HUMAN | Endoplasmic reticulum-Golgi intermediate compartment protein 1 | ERGIC1  |
| Q9Y623 | MYH4_HUMAN  | Myosin-4                                                       | MYH4    |
| P02788 | TRFL_HUMAN  | Lactotransferrin                                               | LTF     |
| O15389 | SIGL5_HUMAN | Sialic acid-binding Ig-like lectin 5                           | SIGLEC5 |
| P25705 | ATPA_HUMAN  | ATP synthase subunit alpha                                     | ATP5F1A |
| P02749 | APOH_HUMAN  | Beta-2-glycoprotein 1                                          | APOH    |
| P02787 | TRFE_HUMAN  | Serotransferrin                                                | TF      |
| O95445 | APOM_HUMAN  | Apolipoprotein M                                               | APOM    |
| Q12907 | LMAN2_HUMAN | Vesicular integral-membrane protein VIP36                      | LMAN2   |
| Q9HBI0 | PARVG_HUMAN | Gamma-parvin                                                   | PARVG   |

|        |             |                                                                               |          |
|--------|-------------|-------------------------------------------------------------------------------|----------|
| P01859 | IGHG2_HUMAN | Immunoglobulin heavy constant gamma 2                                         | IGHG2    |
| P23396 | RS3_HUMAN   | 40S ribosomal protein S3                                                      | RPS3     |
| P49913 | CAMP_HUMAN  | Cathelicidin antimicrobial peptide                                            | CAMP     |
| P13646 | K1C13_HUMAN | Keratin                                                                       | KRT13    |
| P20645 | MPRD_HUMAN  | Cation-dependent mannose-6-phosphate receptor                                 | M6PR     |
| Q15833 | STXB2_HUMAN | Syntaxin-binding protein 2                                                    | STXBP2   |
| P0C0L4 | CO4A_HUMAN  | Complement C4-A                                                               | C4A      |
| P02751 | FINC_HUMAN  | Fibronectin                                                                   | FN1      |
| P20774 | MIME_HUMAN  | Mimecan                                                                       | OGN      |
| P30740 | ILEU_HUMAN  | Leukocyte elastase inhibitor                                                  | SERPINB1 |
| Q96IY4 | CBPB2_HUMAN | Carboxypeptidase B2                                                           | CPB2     |
| O15031 | PLXB2_HUMAN | Plexin-B2                                                                     | PLXNB2   |
| P20340 | RAB6A_HUMAN | Ras-related protein Rab-6A                                                    | RAB6A    |
| P08571 | CD14_HUMAN  | Monocyte differentiation antigen CD14                                         | CD14     |
| P04179 | SODM_HUMAN  | Superoxide dismutase [Mn]                                                     | SOD2     |
| Q14764 | MVP_HUMAN   | Major vault protein                                                           | MVP      |
| Q15067 | ACOX1_HUMAN | Peroxisomal acyl-coenzyme A oxidase 1                                         | ACOX1    |
| O95498 | VNN2_HUMAN  | Vascular non-inflammatory molecule 2                                          | VNN2     |
| B011T2 | MYO1G_HUMAN | Unconventional myosin-Ig [Cleaved into: Minor histocompatibility antigen HA-2 | MYO1G    |
| Q9NPY3 | C1QR1_HUMAN | Complement component C1q receptor                                             | CD93     |
| Q92688 | AN32B_HUMAN | Acidic leucine-rich nuclear phosphoprotein 32 family member B                 | ANP32B   |
| O75695 | XRP2_HUMAN  | Protein XRP2                                                                  | RP2      |
| P13498 | CY24A_HUMAN | Cytochrome b-245 light chain                                                  | CYBA     |
| P23284 | PPIB_HUMAN  | Peptidyl-prolyl cis-trans isomerase B                                         | PPIB     |
| P04899 | GNAI2_HUMAN | Guanine nucleotide-binding protein G                                          | GNAI2    |
| P29966 | MARCS_HUMAN | Myristoylated alanine-rich C-kinase substrate                                 | MARCKS   |
| Q8TD55 | PKHO2_HUMAN | Pleckstrin homology domain-containing family O member 2                       | PLEKHO2  |
| P05771 | KPCB_HUMAN  | Protein kinase C beta type                                                    | PRKCB    |
| Q5JTV8 | TOIP1_HUMAN | Torsin-1A-interacting protein 1                                               | TOR1AIP1 |
| Q7L5N7 | PCAT2_HUMAN | Lysophosphatidylcholine acyltransferase 2                                     | LPCAT2   |
| P61586 | RHOA_HUMAN  | Transforming protein RhoA                                                     | RHOA     |
| P04839 | CY24B_HUMAN | Cytochrome b-245 heavy chain                                                  | CYBB     |
| P61224 | RAP1B_HUMAN | Ras-related protein Rap-1b                                                    | RAP1B    |

|        |             |                                                             |          |
|--------|-------------|-------------------------------------------------------------|----------|
| Q9BRR9 | RHG09_HUMAN | Rho GTPase-activating protein 9                             | ARHGAP9  |
| Q15365 | PCBP1_HUMAN | Poly                                                        | PCBP1    |
| P62277 | RS13_HUMAN  | 40S ribosomal protein S13                                   | RPS13    |
| Q92619 | HMHA1_HUMAN | Rho GTPase-activating protein 45                            | ARHGAP45 |
| P04217 | A1BG_HUMAN  | Alpha-1B-glycoprotein                                       | A1BG     |
| O75636 | FCN3_HUMAN  | Ficolin-3                                                   | FCN3     |
| P08575 | PTPRC_HUMAN | Receptor-type tyrosine-protein phosphatase C                | PTPRC    |
| Q9NTJ5 | SAC1_HUMAN  | Phosphatidylinositide phosphatase SAC1                      | SACM1L   |
| O75874 | IDHC_HUMAN  | Isocitrate dehydrogenase [NADP] cytoplasmic                 | IDH1     |
| P51884 | LUM_HUMAN   | Lumican                                                     | LUM      |
| P30040 | ERP29_HUMAN | Endoplasmic reticulum resident protein 29                   | ERP29    |
| P20618 | PSB1_HUMAN  | Proteasome subunit beta type-1                              | PSMB1    |
| P30048 | PRDX3_HUMAN | Thioredoxin-dependent peroxide reductase                    | PRDX3    |
| O00264 | PGRC1_HUMAN | Membrane-associated progesterone receptor component 1       | PGRMC1   |
| Q93050 | VPP1_HUMAN  | V-type proton ATPase 116 kDa subunit a isoform 1            | ATP6V0A1 |
| P26447 | S10A4_HUMAN | Protein S100-A4                                             | S100A4   |
| Q5VYY1 | ANR22_HUMAN | Ankyrin repeat domain-containing protein 22                 | ANKRD22  |
| P26885 | FKBP2_HUMAN | Peptidyl-prolyl cis-trans isomerase FKBP2                   | FKBP2    |
| P01876 | IGHA1_HUMAN | Immunoglobulin heavy constant alpha 1                       | IGHA1    |
| P17927 | CR1_HUMAN   | Complement receptor type 1                                  | CR1      |
| P43405 | KSYK_HUMAN  | Tyrosine-protein kinase SYK                                 | SYK      |
| Q14344 | GNA13_HUMAN | Guanine nucleotide-binding protein subunit alpha-13         | GNA13    |
| O75367 | H2AY_HUMAN  | Core histone macro-H2A.1                                    | H2AFY    |
| P61769 | B2MG_HUMAN  | Beta-2-microglobulin                                        | B2M      |
| O14579 | COPE_HUMAN  | Coatomer subunit epsilon                                    | COPE     |
| P35527 | K1C9_HUMAN  | Keratin                                                     | KRT9     |
| Q4KMQ2 | ANO6_HUMAN  | Anoctamin-6                                                 | ANO6     |
| P27797 | CALR_HUMAN  | Calreticulin                                                | CALR     |
| P01597 | KV139_HUMAN | Immunoglobulin kappa variable 1-39                          | IGKV1-39 |
| O75022 | LIRB3_HUMAN | Leukocyte immunoglobulin-like receptor subfamily B member 3 | LILRB3   |
| Q9Y394 | DHRS7_HUMAN | Dehydrogenase/reductase SDR family member 7                 | DHRS7    |
| P06737 | PYGL_HUMAN  | Glycogen phosphorylase                                      | PYGL     |
| Q16647 | PTGIS_HUMAN | Prostacyclin synthase                                       | PTGIS    |

|        |             |                                                             |              |
|--------|-------------|-------------------------------------------------------------|--------------|
| P12111 | CO6A3_HUMAN | Collagen alpha-3                                            | COL6A3       |
| P01834 | IGKC_HUMAN  | Immunoglobulin kappa constant                               | IGKC         |
| P01766 | HV313_HUMAN | Immunoglobulin heavy variable 3-13                          | IGHV3-13     |
| O75923 | DYSF_HUMAN  | Dysferlin                                                   | DYSF         |
| P08670 | VIME_HUMAN  | Vimentin                                                    | VIM          |
| P61225 | RAP2B_HUMAN | Ras-related protein Rap-2b                                  | RAP2B        |
| P07900 | HS90A_HUMAN | Heat shock protein HSP 90-alpha                             | HSP90AA<br>1 |
| P02652 | APOA2_HUMAN | Apolipoprotein A-II                                         | APOA2        |
| Q15848 | ADIPO_HUMAN | Adiponectin                                                 | ADIPOQ       |
| O43707 | ACTN4_HUMAN | Alpha-actinin-4                                             | ACTN4        |
| Q16363 | LAMA4_HUMAN | Laminin subunit alpha-4                                     | LAMA4        |
| Q9UBS4 | DJB11_HUMAN | DnaJ homolog subfamily B member 11                          | DNAJB11      |
| P01031 | CO5_HUMAN   | Complement C5                                               | C5           |
| P01024 | CO3_HUMAN   | Complement C3                                               | C3           |
| P01857 | IGHG1_HUMAN | Immunoglobulin heavy constant gamma 1                       | IGHG1        |
| O00560 | SDCB1_HUMAN | Syntenin-1                                                  | SDCBP        |
| P32942 | ICAM3_HUMAN | Intercellular adhesion molecule 3                           | ICAM3        |
| O95747 | OXSR1_HUMAN | Serine/threonine-protein kinase OSR1                        | OXSR1        |
| P00167 | CYB5_HUMAN  | Cytochrome b5                                               | CYB5A        |
| P62834 | RAP1A_HUMAN | Ras-related protein Rap-1A                                  | RAP1A        |
| P30101 | PDIA3_HUMAN | Protein disulfide-isomerase A3                              | PDIA3        |
| P00746 | CFAD_HUMAN  | Complement factor D                                         | CFD          |
| P30273 | FCERG_HUMAN | High affinity immunoglobulin epsilon receptor subunit gamma | FCER1G       |
| P01042 | KNG1_HUMAN  | Kininogen-1                                                 | KNG1         |
| P84077 | ARF1_HUMAN  | ADP-ribosylation factor 1                                   | ARF1         |
| P11279 | LAMP1_HUMAN | Lysosome-associated membrane glycoprotein 1                 | LAMP1        |
| Q7L576 | CYFP1_HUMAN | Cytoplasmic FMR1-interacting protein 1                      | CYFIP1       |
| P62873 | GNB1_HUMAN  | Guanine nucleotide-binding protein G                        | GNB1         |
| P49257 | LMAN1_HUMAN | Protein ERGIC-53                                            | LMAN1        |
| P37802 | TAGL2_HUMAN | Transgelin-2                                                | TAGLN2       |
| P40939 | ECHA_HUMAN  | Trifunctional enzyme subunit alpha                          | HADHA        |
| Q03405 | UPAR_HUMAN  | Urokinase plasminogen activator surface receptor            | PLAUR        |
| P07237 | PDIA1_HUMAN | Protein disulfide-isomerase                                 | P4HB         |
| Q9NYU2 | UGGG1_HUMAN | UDP-glucose:glycoprotein glucosyltransferase 1              | UGGT1        |

|        |             |                                             |              |
|--------|-------------|---------------------------------------------|--------------|
| Q9BXN1 | ASPN_HUMAN  | Asporin                                     | ASPN         |
| P14625 | ENPL_HUMAN  | Endoplasmin                                 | HSP90B1      |
| O75165 | DJC13_HUMAN | DnaJ homolog subfamily C member 13          | DNAJC13      |
| Q9BS26 | ERP44_HUMAN | Endoplasmic reticulum resident protein 44   | ERP44        |
| O14683 | P5I11_HUMAN | Tumor protein p53-inducible protein 11      | TP53I11      |
| P11021 | BIP_HUMAN   | Endoplasmic reticulum chaperone BiP         | HSPA5        |
| P36955 | PEDF_HUMAN  | Pigment epithelium-derived factor           | SERPINF<br>1 |
| Q8IWB1 | IPRI_HUMAN  | Inositol 1                                  | ITPRIP       |
| P06310 | KV230_HUMAN | Immunoglobulin kappa variable 2-30          | IGKV2-30     |
| P18428 | LBP_HUMAN   | Lipopolysaccharide-binding protein          | LBP          |
| P07585 | PGS2_HUMAN  | Decorin                                     | DCN          |
| B9A064 | IGLL5_HUMAN | Immunoglobulin lambda-like polypeptide 5    | IGLL5        |
| P13010 | XRCC5_HUMAN | X-ray repair cross-complementing protein 5  | XRCC5        |
| O15144 | ARPC2_HUMAN | Actin-related protein 2/3 complex subunit 2 | ARPC2        |
| P62333 | PRS10_HUMAN | 26S proteasome regulatory subunit 10B       | PSMC6        |
| P04264 | K2C1_HUMAN  | Keratin                                     | KRT1         |
| P30086 | PEBP1_HUMAN | Phosphatidylethanolamine-binding protein 1  | PEBP1        |
| P11047 | LAMC1_HUMAN | Laminin subunit gamma-1                     | LAMC1        |
| Q08722 | CD47_HUMAN  | Leukocyte surface antigen CD47              | CD47         |
| P02748 | CO9_HUMAN   | Complement component C9                     | C9           |
| P01023 | A2MG_HUMAN  | Alpha-2-macroglobulin                       | A2M          |
| P47985 | UCRI_HUMAN  | Cytochrome b-c1 complex subunit Rieske      | UQCRFS<br>1  |
| P33241 | LSP1_HUMAN  | Lymphocyte-specific protein 1               | LSP1         |
| P08311 | CATG_HUMAN  | Cathepsin G                                 | CTSG         |
| P13473 | LAMP2_HUMAN | Lysosome-associated membrane glycoprotein 2 | LAMP2        |
| P62826 | RAN_HUMAN   | GTP-binding nuclear protein Ran             | RAN          |
| P51636 | CAV2_HUMAN  | Caveolin-2                                  | CAV2         |
| Q03135 | CAV1_HUMAN  | Caveolin-1                                  | CAV1         |
| P21695 | GPDA_HUMAN  | Glycerol-3-phosphate dehydrogenase          | GPD1         |
| P09493 | TPM1_HUMAN  | Tropomyosin alpha-1 chain                   | TPM1         |
| Q9NZN4 | EHD2_HUMAN  | EH domain-containing protein 2              | EHD2         |
| P01714 | LV319_HUMAN | Immunoglobulin lambda variable 3-19         | IGLV3-19     |
| P31415 | CASQ1_HUMAN | Calsequestrin-1                             | CASQ1        |
| P08237 | PFKAM_HUMAN | ATP-dependent 6-phosphofructokinase         | PFKM         |



|        |             |                                                 |           |
|--------|-------------|-------------------------------------------------|-----------|
| Q92954 | PRG4_HUMAN  | Proteoglycan 4                                  | PRG4      |
| O00159 | MYO1C_HUMAN | Unconventional myosin-1c                        | MYO1C     |
| P04211 | LV743_HUMAN | Immunoglobulin lambda variable 7-43             | IGLV7-43  |
| P09211 | GSTP1_HUMAN | Glutathione S-transferase P                     | GSTP1     |
| P04070 | PROC_HUMAN  | Vitamin K-dependent protein C                   | PROC      |
| Q96Q06 | PLIN4_HUMAN | Perilipin-4                                     | PLIN4     |
| O60240 | PLIN1_HUMAN | Perilipin-1                                     | PLIN1     |
| Q6NZI2 | CAVN1_HUMAN | Caveolae-associated protein 1                   | CAVIN1    |
| P12883 | MYH7_HUMAN  | Myosin-7                                        | MYH7      |
| P15090 | FABP4_HUMAN | Fatty acid-binding protein                      | FABP4     |
| P02511 | CRYAB_HUMAN | Alpha-crystallin B chain                        | CRYAB     |
| P06753 | TPM3_HUMAN  | Tropomyosin alpha-3 chain                       | TPM3      |
| P00742 | FA10_HUMAN  | Coagulation factor X                            | F10       |
| Q07955 | SRSF1_HUMAN | Serine/arginine-rich splicing factor 1          | SRSF1     |
| P02794 | FRIH_HUMAN  | Ferritin heavy chain                            | FTH1      |
| Q9UK55 | ZPI_HUMAN   | Protein Z-dependent protease inhibitor          | SERPINA10 |
| Q00872 | MYPC1_HUMAN | Myosin-binding protein C                        | MYBPC1    |
| Q01995 | TAGL_HUMAN  | Transgelin                                      | TAGLN     |
| P08754 | GNAI3_HUMAN | Guanine nucleotide-binding protein G            | GNAI3     |
| P00325 | ADH1B_HUMAN | Alcohol dehydrogenase 1B                        | ADH1B     |
| P07360 | CO8G_HUMAN  | Complement component C8 gamma chain             | C8G       |
| P06732 | KCRM_HUMAN  | Creatine kinase M-type                          | CKM       |
| P09429 | HMGB1_HUMAN | High mobility group protein B1                  | HMGB1     |
| Q9BRX8 | F213A_HUMAN | Redox-regulatory protein FAM213A                | FAM213A   |
| P43307 | SSRA_HUMAN  | Translocon-associated protein subunit alpha     | SSR1      |
| Q15363 | TMED2_HUMAN | Transmembrane emp24 domain-containing protein 2 | TMED2     |
| P26583 | HMGB2_HUMAN | High mobility group protein B2                  | HMGB2     |
| O75531 | BAF_HUMAN   | Barrier-to-autointegration factor               | BANF1     |
| Q13642 | FHL1_HUMAN  | Four and a half LIM domains protein 1           | FHL1      |
| P28066 | PSA5_HUMAN  | Proteasome subunit alpha type-5                 | PSMA5     |
| P01611 | KVD12_HUMAN | Immunoglobulin kappa variable 1D-12             | IGKV1D-12 |
| P35555 | FBN1_HUMAN  | Fibrillin-1 [Cleaved into: Asprosin]            | FBN1      |
| Q16853 | AOC3_HUMAN  | Membrane primary amine oxidase                  | AOC3      |
| P12882 | MYH1_HUMAN  | Myosin-1                                        | MYH1      |

|        |             |                                                      |               |
|--------|-------------|------------------------------------------------------|---------------|
| Q96A32 | MLRS_HUMAN  | Myosin regulatory light chain 2                      | MYLPF         |
| P02792 | FRIL_HUMAN  | Ferritin light chain                                 | FTL           |
| P11217 | PYGM_HUMAN  | Glycogen phosphorylase                               | PYGM          |
| P04439 | 1A03_HUMAN  | HLA class I histocompatibility antigen               | HLA-A         |
| P01700 | LV147_HUMAN | Immunoglobulin lambda variable 1-47                  | IGLV1-47      |
| P00740 | FA9_HUMAN   | Coagulation factor IX                                | F9            |
| P01717 | LV325_HUMAN | Immunoglobulin lambda variable 3-25                  | IGLV3-25      |
| Q8WZ42 | TITIN_HUMAN | Titin                                                | TTN           |
| P02765 | FETUA_HUMAN | Alpha-2-HS-glycoprotein                              | AHSG          |
| Q9UH99 | SUN2_HUMAN  | SUN domain-containing protein 2                      | SUN2          |
| P00352 | AL1A1_HUMAN | Retinal dehydrogenase 1                              | ALDH1A1       |
| Q99879 | H2B1M_HUMAN | Histone H2B type 1-M                                 | HIST1H2<br>BM |
| Q14520 | HABP2_HUMAN | Hyaluronan-binding protein 2                         | HABP2         |
| Q99878 | H2A1J_HUMAN | Histone H2A type 1-J                                 | HIST1H2<br>AJ |
| P59998 | ARPC4_HUMAN | Actin-related protein 2/3 complex subunit 4          | ARPC4         |
| P22792 | CPN2_HUMAN  | Carboxypeptidase N subunit 2                         | CPN2          |
| Q16769 | QPCT_HUMAN  | Glutaminy-peptide cyclotransferase                   | QPCT          |
| P21964 | COMT_HUMAN  | Catechol O-methyltransferase                         | COMT          |
| P23141 | EST1_HUMAN  | Liver carboxylesterase 1                             | CES1          |
| P33121 | ACSL1_HUMAN | Long-chain-fatty-acid--CoA ligase 1                  | ACSL1         |
| P30043 | BLVRB_HUMAN | Flavin reductase                                     | BLVRB         |
| P07910 | HNRPC_HUMAN | Heterogeneous nuclear ribonucleoproteins C1/C2       | HNRNPC        |
| Q99613 | EIF3C_HUMAN | Eukaryotic translation initiation factor 3 subunit C | EIF3C         |
| Q9Y6W5 | WASF2_HUMAN | Wiskott-Aldrich syndrome protein family member 2     | WASF2         |
| P35609 | ACTN2_HUMAN | Alpha-actinin-2                                      | ACTN2         |
| Q13231 | CHIT1_HUMAN | Chitotriosidase-1                                    | CHIT1         |
| Q5D862 | FILA2_HUMAN | Filaggrin-2                                          | FLG2          |
| Q15366 | PCBP2_HUMAN | Poly                                                 | PCBP2         |
| P07099 | HYEP_HUMAN  | Epoxide hydrolase 1                                  | EPHX1         |
| P22891 | PROZ_HUMAN  | Vitamin K-dependent protein Z                        | PROZ          |
| P02671 | FIBA_HUMAN  | Fibrinogen alpha chain                               | FGA           |
| Q9Y639 | NPTN_HUMAN  | Neuroplastin                                         | NPTN          |
| P62805 | H4_HUMAN    | Histone H4                                           | HIST1H4<br>A  |

|        |             |                                                               |          |
|--------|-------------|---------------------------------------------------------------|----------|
| P48735 | IDHP_HUMAN  | Isocitrate dehydrogenase [NADP]                               | IDH2     |
| Q99685 | MGLL_HUMAN  | Monoglyceride lipase                                          | MGLL     |
| P13807 | GYS1_HUMAN  | Glycogen [starch] synthase                                    | GYS1     |
| Q06033 | ITIH3_HUMAN | Inter-alpha-trypsin inhibitor heavy chain H3                  | ITIH3    |
| P04275 | VWF_HUMAN   | von Willebrand factor                                         | VWF      |
| Q14165 | MLEC_HUMAN  | Malectin                                                      | MLEC     |
| P27348 | 1433T_HUMAN | 14-3-3 protein theta                                          | YWHAQ    |
| Q9H8H3 | MET7A_HUMAN | Methyltransferase-like protein 7A                             | METTTL7A |
| P04792 | HSPB1_HUMAN | Heat shock protein beta-1                                     | HSPB1    |
| P06703 | S10A6_HUMAN | Protein S100-A6                                               | S100A6   |
| O14818 | PSA7_HUMAN  | Proteasome subunit alpha type-7                               | PSMA7    |
| P39687 | AN32A_HUMAN | Acidic leucine-rich nuclear phosphoprotein 32 family member A | ANP32A   |
| P05164 | PERM_HUMAN  | Myeloperoxidase                                               | MPO      |
| P49755 | TMEDA_HUMAN | Transmembrane emp24 domain-containing protein 10              | TMED10   |
| P07358 | CO8B_HUMAN  | Complement component C8 beta chain                            | C8B      |
| Q92974 | ARHG2_HUMAN | Rho guanine nucleotide exchange factor 2                      | ARHGEF2  |
| P15169 | CBPN_HUMAN  | Carboxypeptidase N catalytic chain                            | CPN1     |
| P49747 | COMP_HUMAN  | Cartilage oligomeric matrix protein                           | COMP     |
| P51659 | DHB4_HUMAN  | Peroxisomal multifunctional enzyme type 2                     | HSD17B4  |
| P02760 | AMBP_HUMAN  | Protein AMBP [Cleaved into: Alpha-1-microglobulin             | AMBP     |
| Q9NR97 | TLR8_HUMAN  | Toll-like receptor 8                                          | TLR8     |
| Q14324 | MYPC2_HUMAN | Myosin-binding protein C                                      | MYBPC2   |
| P16615 | AT2A2_HUMAN | Sarcoplasmic/endoplasmic reticulum calcium ATPase 2           | ATP2A2   |
| P62330 | ARF6_HUMAN  | ADP-ribosylation factor 6                                     | ARF6     |
| P07355 | ANXA2_HUMAN | Annexin A2                                                    | ANXA2    |
| P04075 | ALDOA_HUMAN | Fructose-bisphosphate aldolase A                              | ALDOA    |
| Q05639 | EF1A2_HUMAN | Elongation factor 1-alpha 2                                   | EEF1A2   |
| P29622 | KAIN_HUMAN  | Kallistatin                                                   | SERPINA4 |
| P27708 | PYR1_HUMAN  | CAD protein                                                   | CAD      |
| Q13418 | ILK_HUMAN   | Integrin-linked protein kinase                                | ILK      |
| P00747 | PLMN_HUMAN  | Plasminogen                                                   | PLG      |
| Q15485 | FCN2_HUMAN  | Ficolin-2                                                     | FCN2     |
| Q9UHG3 | PCYOX_HUMAN | Prenylcysteine oxidase 1                                      | PCYOX1   |
| Q16610 | ECM1_HUMAN  | Extracellular matrix protein 1                                | ECM1     |

|        |             |                                           |          |
|--------|-------------|-------------------------------------------|----------|
| P68104 | EF1A1_HUMAN | Elongation factor 1-alpha 1               | EEF1A1   |
| P19105 | ML12A_HUMAN | Myosin regulatory light chain 12A         | MYL12A   |
| P09382 | LEG1_HUMAN  | Galectin-1                                | LGALS1   |
| P05976 | MYL1_HUMAN  | Myosin light chain 1/3                    | MYL1     |
| Q9Y624 | JAM1_HUMAN  | Junctional adhesion molecule A            | F11R     |
| Q16629 | SRSF7_HUMAN | Serine/arginine-rich splicing factor 7    | SRSF7    |
| P02747 | C1QC_HUMAN  | Complement C1q subcomponent subunit C     | C1QC     |
| P10643 | CO7_HUMAN   | Complement component C7                   | C7       |
| P63316 | TNNC1_HUMAN | Troponin C                                | TNNC1    |
| P00734 | THRB_HUMAN  | Prothrombin                               | F2       |
| P40121 | CAPG_HUMAN  | Macrophage-capping protein                | CAPG     |
| P02743 | SAMP_HUMAN  | Serum amyloid P-component                 | APCS     |
| P13671 | CO6_HUMAN   | Complement component C6                   | C6       |
| P55072 | TERA_HUMAN  | Transitional endoplasmic reticulum ATPase | VCP      |
| O95782 | AP2A1_HUMAN | AP-2 complex subunit alpha-1              | AP2A1    |
| P06396 | GELS_HUMAN  | Gelsolin                                  | GSN      |
| P08603 | CFAH_HUMAN  | Complement factor H                       | CFH      |
| P01011 | AACT_HUMAN  | Alpha-1-antichymotrypsin                  | SERPINA3 |
| O15162 | PLS1_HUMAN  | Phospholipid scramblase 1                 | PLSCR1   |
| P10301 | RRAS_HUMAN  | Ras-related protein R-Ras                 | RRAS     |
| O94905 | ERLN2_HUMAN | Erlin-2                                   | ERLIN2   |
| P62195 | PRS8_HUMAN  | 26S proteasome regulatory subunit 8       | PSMC5    |
| P25786 | PSA1_HUMAN  | Proteasome subunit alpha type-1           | PSMA1    |
| P26022 | PTX3_HUMAN  | Pentraxin-related protein PTX3            | PTX3     |
| P30536 | TSPO_HUMAN  | Translocator protein                      | TSPO     |
| P02679 | FIBG_HUMAN  | Fibrinogen gamma chain                    | FGG      |
| Q9BXR6 | FHR5_HUMAN  | Complement factor H-related protein 5     | CFHR5    |
| Q16555 | DPYL2_HUMAN | Dihydropyrimidinase-related protein 2     | DPYSL2   |
| P43686 | PRS6B_HUMAN | 26S proteasome regulatory subunit 6B      | PSMC4    |
| P50395 | GDIB_HUMAN  | Rab GDP dissociation inhibitor beta       | GDI2     |
| P08590 | MYL3_HUMAN  | Myosin light chain 3                      | MYL3     |
| P35754 | GLRX1_HUMAN | Glutaredoxin-1                            | GLRX     |
| Q01130 | SRSF2_HUMAN | Serine/arginine-rich splicing factor 2    | SRSF2    |
| P60981 | DEST_HUMAN  | Dextrin                                   | DSTN     |

|        |             |                                                                                                   |          |
|--------|-------------|---------------------------------------------------------------------------------------------------|----------|
| Q16836 | HCDH_HUMAN  | Hydroxyacyl-coenzyme A dehydrogenase                                                              | HADH     |
| P61006 | RAB8A_HUMAN | Ras-related protein Rab-8A                                                                        | RAB8A    |
| P78371 | TCPB_HUMAN  | T-complex protein 1 subunit beta                                                                  | CCT2     |
| P19338 | NUCL_HUMAN  | Nucleolin                                                                                         | NCL      |
| P68032 | ACTC_HUMAN  | Actin                                                                                             | ACTC1    |
| Q9Y265 | RUVB1_HUMAN | RuvB-like 1                                                                                       | RUVBL1   |
| O14983 | AT2A1_HUMAN | Sarcoplasmic/endoplasmic reticulum calcium ATPase 1                                               | ATP2A1   |
| Q92604 | LGAT1_HUMAN | Acyl-CoA:lysophosphatidylglycerol acyltransferase 1                                               | LPGAT1   |
| P11597 | CETP_HUMAN  | Cholesteryl ester transfer protein                                                                | CETP     |
| P00450 | CERU_HUMAN  | Ceruloplasmin                                                                                     | CP       |
| P36957 | ODO2_HUMAN  | Dihydrolipoyllysine-residue succinyltransferase component of 2-oxoglutarate dehydrogenase complex | DLST     |
| Q16851 | UGPA_HUMAN  | UTP--glucose-1-phosphate uridylyltransferase                                                      | UGP2     |
| Q01105 | SET_HUMAN   | Protein SET                                                                                       | SET      |
| P04844 | RPN2_HUMAN  | Dolichyl-diphosphooligosaccharide--protein glycosyltransferase subunit 2                          | RPN2     |
| P07357 | CO8A_HUMAN  | Complement component C8 alpha chain                                                               | C8A      |
| P00488 | F13A_HUMAN  | Coagulation factor XIII A chain                                                                   | F13A1    |
| P02746 | C1QB_HUMAN  | Complement C1q subcomponent subunit B                                                             | C1QB     |
| P20160 | CAP7_HUMAN  | Azurocidin                                                                                        | AZU1     |
| P55083 | MFAP4_HUMAN | Microfibril-associated glycoprotein 4                                                             | MFAP4    |
| P01743 | HV146_HUMAN | Immunoglobulin heavy variable 1-46                                                                | IGHV1-46 |
| Q8IZ83 | A16A1_HUMAN | Aldehyde dehydrogenase family 16 member A1                                                        | ALDH16A1 |
| P35573 | GDE_HUMAN   | Glycogen debranching enzyme                                                                       | AGL      |
| P50148 | GNAQ_HUMAN  | Guanine nucleotide-binding protein G                                                              | GNAQ     |
| P01619 | KV320_HUMAN | Immunoglobulin kappa variable 3-20                                                                | IGKV3-20 |
| P22392 | NDKB_HUMAN  | Nucleoside diphosphate kinase B                                                                   | NME2     |
| Q9NQC3 | RTN4_HUMAN  | Reticulon-4                                                                                       | RTN4     |
| Q8WWI5 | CTL1_HUMAN  | Choline transporter-like protein 1                                                                | SLC44A1  |
| P46976 | GLYG_HUMAN  | Glycogenin-1                                                                                      | GYG1     |
| Q93033 | IGSF2_HUMAN | Immunoglobulin superfamily member 2                                                               | CD101    |
| P07948 | LYN_HUMAN   | Tyrosine-protein kinase Lyn                                                                       | LYN      |
| P01892 | 1A02_HUMAN  | HLA class I histocompatibility antigen                                                            | HLA-A    |
| P22897 | MRC1_HUMAN  | Macrophage mannose receptor 1                                                                     | MRC1     |
| P01599 | KV117_HUMAN | Immunoglobulin kappa variable 1-17                                                                | IGKV1-17 |
| O14773 | TPP1_HUMAN  | Tripeptidyl-peptidase 1                                                                           | TPP1     |

|        |             |                                                       |              |
|--------|-------------|-------------------------------------------------------|--------------|
| P20742 | PZP_HUMAN   | Pregnancy zone protein                                | PZP          |
| Q9UHA4 | LTOR3_HUMAN | Ragulator complex protein LAMTOR3                     | LAMTOR3      |
| Q8NBJS | GT251_HUMAN | Procollagen galactosyltransferase 1                   | COLGALT<br>1 |
| P01780 | HV307_HUMAN | Immunoglobulin heavy variable 3-7                     | IGHV3-7      |
| Q15005 | SPCS2_HUMAN | Signal peptidase complex subunit 2                    | SPCS2        |
| P67809 | YBOX1_HUMAN | Nuclease-sensitive element-binding protein 1          | YBX1         |
| Q9NVA2 | SEP11_HUMAN | Septin-11                                             | 11-sept      |
| P02675 | FIBB_HUMAN  | Fibrinogen beta chain [Cleaved into: Fibrinopeptide B | FGB          |
| Q9Y673 | ALG5_HUMAN  | Dolichyl-phosphate beta-glucosyltransferase           | ALG5         |
| P00387 | NB5R3_HUMAN | NADH-cytochrome b5 reductase 3                        | CYB5R3       |
| P01624 | KV315_HUMAN | Immunoglobulin kappa variable 3-15                    | IGKV3-15     |
| P00736 | C1R_HUMAN   | Complement C1r subcomponent                           | C1R          |
| Q05469 | LIPS_HUMAN  | Hormone-sensitive lipase                              | LIPE         |
| P62987 | RL40_HUMAN  | Ubiquitin-60S ribosomal protein L40                   | UBA52        |
| P09496 | CLCA_HUMAN  | Clathrin light chain A                                | CLTA         |
| Q6P2Q9 | PRP8_HUMAN  | Pre-mRNA-processing-splicing factor 8                 | PRPF8        |
| P04216 | THY1_HUMAN  | Thy-1 membrane glycoprotein                           | THY1         |
| P0C0L5 | CO4B_HUMAN  | Complement C4-B                                       | C4B          |
| P62993 | GRB2_HUMAN  | Growth factor receptor-bound protein 2                | GRB2         |
| P63010 | AP2B1_HUMAN | AP-2 complex subunit beta                             | AP2B1        |
| P61106 | RAB14_HUMAN | Ras-related protein Rab-14                            | RAB14        |
| P08648 | ITA5_HUMAN  | Integrin alpha-5                                      | ITGA5        |
| Q9H4G4 | GAPR1_HUMAN | Golgi-associated plant pathogenesis-related protein 1 | GLIPR2       |
| P05452 | TETN_HUMAN  | Tetranectin                                           | CLEC3B       |
| P54920 | SNAA_HUMAN  | Alpha-soluble NSF attachment protein                  | NAPA         |
| O00161 | SNP23_HUMAN | Synaptosomal-associated protein 23                    | SNAP23       |
| Q14624 | ITIH4_HUMAN | Inter-alpha-trypsin inhibitor heavy chain H4          | ITIH4        |
| P21397 | AOFA_HUMAN  | Amine oxidase [flavin-containing] A                   | MAOA         |
| Q08043 | ACTN3_HUMAN | Alpha-actinin-3                                       | ACTN3        |
| P12429 | ANXA3_HUMAN | Annexin A3                                            | ANXA3        |
| Q00013 | EM55_HUMAN  | 55 kDa erythrocyte membrane protein                   | MPP1         |
| P13667 | PDIA4_HUMAN | Protein disulfide-isomerase A4                        | PDIA4        |
| P13639 | EF2_HUMAN   | Elongation factor 2                                   | EEF2         |
| P56134 | ATPK_HUMAN  | ATP synthase subunit f                                | ATP5J2       |

|        |             |                                                     |               |
|--------|-------------|-----------------------------------------------------|---------------|
| O00116 | ADAS_HUMAN  | Alkyldihydroxyacetonephosphate synthase             | AGPS          |
| P50461 | CSRP3_HUMAN | Cysteine and glycine-rich protein 3                 | CSRP3         |
| P17931 | LEG3_HUMAN  | Galectin-3                                          | LGALS3        |
| Q99715 | COCA1_HUMAN | Collagen alpha-1                                    | COL12A1       |
| Q92743 | HTRA1_HUMAN | Serine protease HTRA1                               | HTRA1         |
| P07203 | GPX1_HUMAN  | Glutathione peroxidase 1                            | GPX1          |
| P00749 | UROK_HUMAN  | Urokinase-type plasminogen activator                | PLAU          |
| P24557 | THAS_HUMAN  | Thromboxane-A synthase                              | TBXAS1        |
| P08133 | ANXA6_HUMAN | Annexin A6                                          | ANXA6         |
| P23229 | ITA6_HUMAN  | Integrin alpha-6                                    | ITGA6         |
| Q8NBQ5 | DHB11_HUMAN | Estradiol 17-beta-dehydrogenase 11                  | HSD17B1<br>1  |
| P21589 | 5NTD_HUMAN  | 5'-nucleotidase                                     | NT5E          |
| P45880 | VDAC2_HUMAN | Voltage-dependent anion-selective channel protein 2 | VDAC2         |
| P05160 | F13B_HUMAN  | Coagulation factor XIII B chain                     | F13B          |
| P51809 | VAMP7_HUMAN | Vesicle-associated membrane protein 7               | VAMP7         |
| P02745 | C1QA_HUMAN  | Complement C1q subcomponent subunit A               | C1QA          |
| Q14315 | FLNC_HUMAN  | Filamin-C                                           | FLNC          |
| P01615 | KVD28_HUMAN | Immunoglobulin kappa variable 2D-28                 | IGKV2D-<br>28 |
| P08758 | ANXA5_HUMAN | Annexin A5                                          | ANXA5         |
| Q9UIQ6 | LCAP_HUMAN  | Leucyl-cystinyl aminopeptidase                      | LNPEP         |
| P25787 | PSA2_HUMAN  | Proteasome subunit alpha type-2                     | PSMA2         |
| Q99653 | CHP1_HUMAN  | Calcineurin B homologous protein 1                  | CHP1          |
| Q92556 | ELMO1_HUMAN | Engulfment and cell motility protein 1              | ELMO1         |
| Q9BSJ8 | ESYT1_HUMAN | Extended synaptotagmin-1                            | ESYT1         |
| P08174 | DAF_HUMAN   | Complement decay-accelerating factor                | CD55          |
